# Supplementary material for: Metatranscriptomics Reveals Antibiotic-Induced Resistance Gene Expression in the Murine Gut Microbiota
Source: Front Microbiol. 2020 Mar 6;11:322. doi: 10.3389/fmicb.2020.00322 (PMC7069102; doi:10.3389/fmicb.2020.00322)
Supplement: Supplementary file 2 [file Data_Sheet_2.xlsx]

## Sheet: species_relativeabundance
Table S2 – Species relative abundance for each sample. Tab 1 contains abundances for each bacterial taxa, tab 2 contains the relative abundance of the top 250 most abundant taxa, and tab 3 contains the relative abundance of the top 25 most abundant taxa.
	Control 12 hours	Control 12 hours	Control 12 hours	Control 12 hours	Control 24 hours	Control 24 hours	Control 24 hours	Control 24 hours	Doxycycline	Doxycycline	Doxycycline	Doxycycline	Ciprofloxacin	Ciprofloxacin	Ciprofloxacin	Ciprofloxacin	Amoxicillin	Amoxicillin	Amoxicillin	Amoxicillin
Muribaculum intestinale	0.0809306	0.0672403	0.0400114	0.0264895	0.0185295	0.0380524	0.0375709	0.0463249	0.0267325	0.00734081	0.00965433	0.0295225	0.000684681	0.000599495	0.000616453	0.000456515	0.00285274	0.00498842	0.00395244	0.00296222
Lachnoclostridium sp. YL32	0.0481853	0.0427807	0.040067	0.0463814	0.042757	0.0365819	0.0391969	0.0391955	0.0435352	0.0599589	0.0474949	0.0421121	0.0563668	0.0599394	0.061245	0.0571426	0.00203458	0.0189709	0.0141416	0.0173879
Lachnospiraceae bacterium GAM79	0.0464622	0.044983	0.0297058	0.0465788	0.0625737	0.0508208	0.0589121	0.0665677	0.0696278	0.0784335	0.0694449	0.0708035	0.0849045	0.0892336	0.0843716	0.0831148	0.00311813	0.0194176	0.0115791	0.0169734
Bacteroides thetaiotaomicron	0.0427315	0.0396702	0.0638866	0.042909	0.0475538	0.0624874	0.0522137	0.0569606	0.00761202	0.00282787	0.00262791	0.0140263	0.0054411	0.00554285	0.00612945	0.00694145	0.808982	0.458258	0.574623	0.529782
Hungateiclostridiaceae bacterium KB18	0.0408601	0.0549627	0.0801481	0.0560705	0.050906	0.0525784	0.0556459	0.0430985	0.0642148	0.0467415	0.0782046	0.0576821	0.0428323	0.051376	0.0448193	0.0490036	0.00453633	0.0202693	0.0216177	0.0189882
Clostridiales bacterium CCNA10	0.0276608	0.0303334	0.0460885	0.0306155	0.0297472	0.024978	0.0312688	0.0284863	0.030462	0.0455674	0.0409876	0.0334766	0.0573154	0.0373934	0.047233	0.0606214	0.00537893	0.0220681	0.0225412	0.0213954
Roseburia hominis	0.0275852	0.0260985	0.0213713	0.0276836	0.0230087	0.0204884	0.0227749	0.0259189	0.0273536	0.0331751	0.0278688	0.0277355	0.0257373	0.025722	0.0258027	0.0243083	0.000968345	0.0061194	0.0038763	0.00488648
[Clostridium] scindens	0.0239349	0.0199334	0.0223935	0.0207013	0.0172162	0.0139461	0.0147238	0.0146609	0.0177049	0.0213567	0.0191022	0.0156473	0.0259564	0.0235717	0.028783	0.0229927	0.00102308	0.00600062	0.00450112	0.00644909
Oscillibacter sp. PEA192	0.0213827	0.0258216	0.0347717	0.0463728	0.0592227	0.0503233	0.0352526	0.0337965	0.0513522	0.0309319	0.051132	0.0452908	0.0176833	0.021606	0.0177827	0.0217219	0.00199681	0.0412935	0.0370375	0.0281644
Lachnoclostridium phocaeense	0.0172302	0.017184	0.0159698	0.0195641	0.0157677	0.0134935	0.0156436	0.0143193	0.0158703	0.0182365	0.0167562	0.0157785	0.0219176	0.0213822	0.021601	0.020551	0.00105555	0.00470626	0.0036665	0.00477709
Flavonifractor plautii	0.0169892	0.0179905	0.0200688	0.0213369	0.0219368	0.018091	0.0176609	0.0149505	0.0196469	0.0198826	0.0225895	0.0204968	0.0226034	0.0215456	0.022847	0.0248398	0.00169064	0.0149009	0.0153793	0.0141156
[Eubacterium] rectale	0.0157938	0.0155405	0.0126136	0.0160522	0.0148799	0.012798	0.0144552	0.0143344	0.0148041	0.0182483	0.0161369	0.015283	0.0159753	0.0161458	0.0174461	0.0153207	0.000744779	0.0042396	0.00305021	0.00377542
Intestinimonas butyriciproducens	0.0153722	0.0178536	0.0201303	0.0186035	0.0201526	0.0172155	0.0171021	0.0157323	0.0191043	0.0201717	0.0229104	0.019942	0.0214432	0.0188218	0.0207238	0.0232646	0.00180571	0.0138474	0.0131351	0.0126492
Akkermansia muciniphila	0.0142127	0.00393942	0.00888688	0.00955524	0.0054226	0.020532	0.0186715	0.0299722	0.0425313	0.00947146	0.0231252	0.0465882	0.0055384	0.00502035	0.00282422	0.00227188	0.00191833	0.0750336	0.00630189	0.0106498
[Clostridium] saccharolyticum	0.0134306	0.0178544	0.0170765	0.0197803	0.0150563	0.0162689	0.0165542	0.0133818	0.0169449	0.0214465	0.019848	0.0157088	0.0303605	0.0265178	0.0261758	0.0275329	0.00156783	0.00996824	0.00805322	0.0125849
Faecalibacterium prausnitzii	0.012384	0.0133376	0.0122564	0.0136192	0.0142805	0.0125776	0.0128682	0.0115909	0.0133087	0.0147513	0.0147463	0.0129527	0.0144187	0.0148978	0.0156856	0.0146603	0.00105611	0.00681259	0.00609462	0.00659591
Oscillibacter valericigenes	0.0121719	0.0150348	0.0192134	0.0222741	0.0292333	0.0257017	0.0180628	0.0184296	0.0257484	0.0187929	0.0252499	0.0223624	0.0134742	0.0175895	0.0143928	0.0171863	0.00131354	0.0179935	0.016156	0.0131734
Lachnospiraceae bacterium Choco86	0.0115745	0.0109312	0.0106168	0.0147028	0.00920293	0.00828828	0.0087228	0.00924531	0.0103988	0.012405	0.0107359	0.00957939	0.0110501	0.0107661	0.0107107	0.0101431	0.000760209	0.0026415	0.00193477	0.00301341
Mordavella sp. Marseille-P3756	0.0112645	0.00997227	0.0107434	0.0108678	0.00940569	0.00749335	0.00819752	0.00792982	0.00950871	0.0107431	0.0103941	0.00837657	0.0157592	0.0143161	0.015069	0.014072	0.000696742	0.00301299	0.0023306	0.00351106
Barnesiella viscericola	0.0111439	0.00946127	0.00687631	0.0046266	0.00345532	0.00706266	0.00688784	0.00856552	0.00455496	0.00134964	0.00169172	0.00506037	0.00031093	0.000283687	0.000298542	0.000272804	0.0014388	0.00165142	0.00154761	0.00130321
Blautia sp. YL58	0.00927629	0.0105608	0.00863687	0.0112002	0.00939352	0.00821912	0.00942459	0.00944512	0.00987165	0.0136413	0.0104566	0.00969039	0.012119	0.0129423	0.0114283	0.0118436	0.000651498	0.00291848	0.00230076	0.00294949
[Eubacterium] hallii	0.00881268	0.00858841	0.0078755	0.00894842	0.00873706	0.00732937	0.00828509	0.00827115	0.00863237	0.0100686	0.00955711	0.00878374	0.0107318	0.010496	0.0107877	0.0105178	0.00069737	0.00270509	0.00212162	0.00284825
[Clostridium] bolteae	0.00857632	0.0102383	0.00927147	0.0109661	0.01064	0.00939187	0.01078	0.0100074	0.0116677	0.013458	0.0127077	0.0110103	0.0149433	0.0139226	0.0142239	0.0141031	0.000826748	0.00581344	0.00450317	0.00595729
Lachnoclostridium phytofermentans	0.00842679	0.0100473	0.00761712	0.0116625	0.0105824	0.0111017	0.0102738	0.0101589	0.0105841	0.0121669	0.0114998	0.01114	0.0131927	0.012668	0.0126581	0.0116477	0.000872551	0.00300438	0.00212483	0.00332107
Blautia producta	0.00841804	0.00917244	0.0082113	0.0104028	0.00913389	0.00795258	0.00858422	0.00849013	0.00949124	0.0117419	0.0100493	0.00955795	0.011382	0.0121781	0.0118379	0.0112568	0.000672444	0.00372294	0.0025615	0.00318621
[Eubacterium] eligens	0.0077554	0.00804491	0.0072972	0.0086944	0.00859377	0.00926733	0.00943617	0.0088083	0.00859836	0.010227	0.00917276	0.00895357	0.00928523	0.00920811	0.00888838	0.00843769	0.000625734	0.0029668	0.00227262	0.00274981
Butyrivibrio proteoclasticus	0.00764589	0.00848843	0.00612813	0.00864622	0.00918832	0.00757476	0.00846671	0.00986983	0.0102297	0.0121236	0.0104916	0.0112866	0.0132377	0.0128611	0.0140073	0.0119426	0.000560242	0.00325017	0.00197499	0.002495
Anaerostipes hadrus	0.00741417	0.00730257	0.00650151	0.0077353	0.00776602	0.0066187	0.00722534	0.00664835	0.00707458	0.00920505	0.00805636	0.0071439	0.0093253	0.00916113	0.00882445	0.00853801	0.000589776	0.00230592	0.0017656	0.00258032
Blautia sp. N6H1-15	0.0073311	0.00686684	0.00633205	0.0076847	0.00688768	0.00614403	0.00662497	0.00650812	0.00707335	0.00877703	0.00755087	0.00692017	0.00916425	0.00916894	0.00892739	0.00857133	0.000465775	0.00233258	0.00157629	0.00222784
Butyrivibrio hungatei	0.00680693	0.00761528	0.00547269	0.00774134	0.00836318	0.00671908	0.00740575	0.00905012	0.00925454	0.0106186	0.0093197	0.0105667	0.0120133	0.0115747	0.0126554	0.0108377	0.000354829	0.00280526	0.0016254	0.00184352
Blautia hansenii	0.00678638	0.00692377	0.00665424	0.00761269	0.0072619	0.00602671	0.00690906	0.0072478	0.00809462	0.00971173	0.00833906	0.0080746	0.00868704	0.00790841	0.00866488	0.00779746	0.000536713	0.00237886	0.00171787	0.00250252
Clostridium sp. SY8519	0.00658718	0.00619532	0.00549779	0.00626574	0.00622948	0.00524253	0.00576655	0.00629089	0.00661159	0.00791264	0.00709079	0.0067192	0.00743474	0.00717247	0.00719805	0.00692078	0.000406636	0.00206115	0.00150349	0.0019198
Clostridioides difficile	0.00614805	0.00587733	0.00552658	0.00718115	0.00787593	0.00642132	0.00690605	0.0079394	0.00803165	0.00729044	0.00831062	0.00756817	0.00892098	0.00984558	0.0093641	0.0091205	0.000459979	0.00271259	0.00212292	0.00257497
Lachnoanaerobaculum umeaense	0.0053684	0.00627113	0.00581502	0.0067016	0.00559493	0.0052192	0.00564181	0.0054172	0.00604427	0.00746791	0.00673656	0.00599629	0.00831068	0.0074374	0.00777359	0.00765117	0.000431493	0.00252356	0.00201501	0.00302755
Enterococcus faecalis	0.00511203	0.00319014	0.00412366	0.00309143	0.00415107	0.00394205	0.00322559	0.00266627	0.0027076	0.00417922	0.00289766	0.00274109	0.00288375	0.00347659	0.00362828	0.00326831	0.000164009	0.00113218	0.00095953	0.00108826
Herbinix luporum	0.00467843	0.00521886	0.00431539	0.00563164	0.00510994	0.00509768	0.00515279	0.00501789	0.00523657	0.00596609	0.0057238	0.00559129	0.00693517	0.00684991	0.00672192	0.00634952	0.000406567	0.00152441	0.00105186	0.00155178
Ruminococcus albus	0.00425323	0.00524719	0.00500997	0.00570848	0.00556589	0.00543908	0.00572653	0.00518416	0.00525082	0.00579527	0.00561783	0.00540842	0.00476275	0.00503161	0.00485401	0.00474423	0.000653383	0.00223936	0.00173624	0.00221651
Bacteroides caecimuris	0.00415998	0.00355561	0.00270685	0.00185292	0.00274321	0.00437023	0.00352608	0.0043207	0.000500676	0.000231262	0.000216666	0.000686105	0.000230588	0.000244211	0.000287163	0.000280466	0.0179183	0.010444	0.0132929	0.0120459
Bacteroides fragilis	0.00408262	0.00336788	0.00229901	0.00160961	0.00149064	0.00255211	0.00241983	0.00267091	0.0014193	0.000538183	0.000682124	0.00154218	0.000442162	0.000404816	0.000421128	0.000446893	0.00734333	0.00437262	0.00535418	0.00501828
Bacteroides salanitronis	0.00403063	0.00336732	0.00304421	0.00215495	0.00124179	0.00227802	0.0021204	0.00255766	0.00137793	0.000552114	0.000624929	0.0014777	0.000249975	0.000242259	0.000246798	0.000248036	0.00187699	0.0013775	0.00151681	0.00135542
Erysipelotrichaceae bacterium I46	0.00369279	0.00351479	0.00341419	0.00361587	0.00403578	0.00348484	0.00349026	0.00344988	0.00361274	0.00359925	0.0039694	0.00357891	0.00374533	0.00377934	0.00425828	0.00328577	0.000468358	0.00144609	0.0011875	0.00153689
Paraprevotella xylaniphila	0.00332619	0.00286299	0.0022315	0.00152395	0.00112632	0.00206133	0.0019591	0.00234028	0.001288	0.000527038	0.000613132	0.001398	0.000249788	0.000260271	0.000235691	0.000271557	0.0024563	0.00163152	0.00192172	0.00176037
Anaerotignum propionicum	0.00329261	0.00345425	0.00381282	0.00370826	0.0049143	0.0045886	0.00504701	0.00379536	0.00512672	0.00923163	0.0055243	0.00499966	0.0116823	0.0132504	0.0120426	0.012248	0.000321176	0.00180769	0.00144995	0.00157318
Bacteroides cellulosilyticus	0.00315808	0.00276356	0.00229589	0.00162757	0.00109972	0.00196263	0.00182518	0.00211602	0.00119638	0.000478171	0.000562363	0.00130324	0.000233198	0.000270178	0.000295291	0.000235385	0.00319647	0.00196876	0.00235956	0.00213845
Lactobacillus johnsonii	0.00304964	0.00104699	0.00126862	0.000704732	0.000614201	0.000705292	0.000971273	0.000337177	0.00120833	0.000849819	0.000842754	0.00179822	8.77987e-05	0.000135239	7.36872e-05	0.000281357	0.000181464	8.27608e-05	7.89478e-05	0.000241058
Adlercreutzia equolifaciens	0.0029771	0.00261138	0.0041584	0.0032484	0.00133587	0.00148461	0.0020405	0.00145812	0.000829762	0.000843603	0.000857817	0.000846366	0.00104613	0.00101992	0.000995996	0.00105291	0.000249121	0.000671437	0.000512136	0.000602708
Ruminococcus bicirculans	0.0028826	0.00349118	0.00338867	0.00374193	0.00369164	0.0037069	0.00392572	0.00371039	0.00374419	0.0037362	0.00407379	0.00371004	0.00346535	0.00361888	0.00355446	0.00330483	0.000298344	0.00141406	0.00118094	0.00133696
Prevotella ruminicola	0.00286705	0.00245169	0.00176354	0.00128116	0.000912954	0.00154973	0.00147203	0.00174978	0.00101882	0.000488244	0.00054393	0.00110588	0.000307761	0.000294044	0.000258447	0.000272448	0.000253868	0.000357612	0.000338738	0.000320646
Ethanoligenens harbinense	0.00286455	0.00331011	0.00315737	0.00376076	0.00399248	0.00399912	0.0034057	0.00324463	0.0035484	0.00427867	0.004084	0.0036657	0.00370749	0.00551343	0.00434822	0.00440567	0.00030393	0.00177343	0.00151688	0.00164334
Alistipes finegoldii	0.00279059	0.00236921	0.00133371	0.000944075	0.00102946	0.00185085	0.0016386	0.00217672	0.000813522	0.000313351	0.00036592	0.00086868	0.000176343	0.000202033	0.000197899	0.000189056	0.000829401	0.000843253	0.000843294	0.00078366
Lachnospiraceae bacterium oral taxon 500	0.00262998	0.00245696	0.00248265	0.00262034	0.00273243	0.00242186	0.00268992	0.00237845	0.00252682	0.00302077	0.00271944	0.0025504	0.00296484	0.00308558	0.0032207	0.00290819	0.000277189	0.00113847	0.000952906	0.00117091
Bacteroides ovatus	0.00249509	0.00214786	0.00257043	0.00179144	0.00139465	0.00207694	0.00176454	0.00206092	0.00051615	0.000261697	0.000243736	0.000645823	0.000244196	0.000271529	0.00025926	0.000284565	0.0177593	0.0102831	0.012385	0.0112397
Faecalibaculum rodentium	0.00245668	0.0017524	0.00132563	0.00123246	0.00103729	0.00115831	0.00141786	0.0011687	0.000957689	0.000988705	0.000973891	0.000955186	0.00122191	0.00116627	0.00116775	0.0011534	0.000453137	0.000504711	0.000515073	0.000632888
Caproiciproducens sp. NJN-50	0.00231001	0.00251417	0.00270997	0.00274484	0.00288633	0.00272013	0.00239817	0.00238005	0.00274958	0.0028373	0.0029221	0.00250041	0.00352872	0.00328641	0.00349567	0.00334813	0.000261688	0.0016105	0.00150185	0.00152835
Turicibacter sp. H121	0.00229089	0.0014994	0.00215408	0.00276902	0.000701845	0.00120329	0.00122225	0.000808683	0.000473865	0.00049746	0.000490211	0.000518745	0.000531639	0.000557467	0.000517029	0.00048556	0.000334302	0.000415748	0.000524224	0.000719353
Aminipila sp. JN-39	0.00214975	0.00243752	0.00249754	0.00257078	0.0025954	0.00245812	0.00231285	0.00207354	0.00222148	0.00257196	0.00231233	0.00205846	0.00258083	0.00275837	0.00262605	0.00278168	0.000209881	0.000976282	0.000836396	0.000956845
Clostridium botulinum	0.00207114	0.00221591	0.00203255	0.00242434	0.00228812	0.00219292	0.00238252	0.00193458	0.00196486	0.00232677	0.00218899	0.00203064	0.00278961	0.00277938	0.00272155	0.00279664	0.00021805	0.000867693	0.00072897	0.000889863
Enterococcus faecium	0.00205239	0.00212009	0.00180126	0.00234508	0.00205389	0.00194988	0.00217081	0.00192228	0.00193529	0.00270978	0.00206607	0.00179257	0.00275382	0.00295184	0.00302429	0.00265303	0.000196964	0.000797985	0.000675905	0.000813713
Odoribacter splanchnicus	0.00196485	0.00160521	0.00128734	0.000857214	0.00064185	0.00115831	0.00110053	0.00127396	0.000651737	0.000266627	0.000300931	0.000698712	0.000153974	0.000154302	0.000138028	0.000161616	0.00188453	0.0012627	0.00145371	0.00136981
Paludibacter propionicigenes	0.00193465	0.00163187	0.00111632	0.000809207	0.000634199	0.00111484	0.0010453	0.00130686	0.000667211	0.000247123	0.00029914	0.000733633	0.000116506	0.00012128	8.54717e-05	0.000103705	0.000161496	0.000281331	0.000231995	0.000213807
Prevotella intermedia	0.00183103	0.00161631	0.00115007	0.000804372	0.000775229	0.00141361	0.00138296	0.00164979	0.000888899	0.000366076	0.000399416	0.000948521	0.000157889	0.000157904	0.000128275	0.000130611	0.000507109	0.000491844	0.000490419	0.000452572
Porphyromonas gingivalis	0.00174206	0.00147023	0.0010708	0.000717683	0.000617853	0.00114942	0.0011416	0.00139838	0.000776446	0.000281415	0.000336217	0.000853756	0.000135147	0.000138841	0.000125702	0.000132037	0.000205762	0.000265686	0.000248112	0.000229852
Prevotella dentalis	0.00172956	0.00146385	0.0010864	0.000729771	0.000412829	0.000814896	0.000793269	0.000965212	0.000572376	0.000234049	0.000255955	0.000615684	8.72395e-05	0.000109872	0.000108634	0.00010905	0.000256103	0.000238007	0.000238004	0.00022132
Pseudoclostridium thermosuccinogenes	0.00172152	0.00185376	0.00165987	0.00201421	0.00229856	0.00209154	0.00215967	0.00204527	0.00222455	0.0025366	0.00220932	0.00220887	0.00239927	0.002659	0.00220181	0.00244081	0.000253659	0.000914072	0.0007526	0.00105795
Tannerella sp. oral taxon HOT-286	0.00166238	0.00140803	0.000994789	0.00069627	0.000559076	0.00106717	0.00101431	0.00128051	0.000741362	0.000282058	0.000326842	0.000808691	6.67345e-05	6.76946e-05	8.20854e-05	6.16527e-05	0.000126166	0.000214123	0.000187945	0.000152301
Ruminococcaceae bacterium CPB6	0.00162701	0.00172129	0.00179615	0.00181528	0.00197146	0.00178942	0.00171429	0.00169755	0.00180553	0.00199456	0.00180264	0.00173258	0.00225201	0.002283	0.00232209	0.00218564	0.000221122	0.000933142	0.00084466	0.000964231
Clostridium cellulovorans	0.00162326	0.00196096	0.00160329	0.00200402	0.00185338	0.0017206	0.00191712	0.00195199	0.00191522	0.00271792	0.00197317	0.00197804	0.00179437	0.00176426	0.00179369	0.0016101	0.000188307	0.000541371	0.000424174	0.000588191
Tannerella forsythia	0.00160879	0.00137192	0.00102287	0.000707667	0.000600811	0.00112877	0.00113905	0.00135079	0.000804023	0.000292561	0.000364972	0.000855784	0.000133842	0.000114225	0.000138976	0.000124553	0.000233341	0.000278276	0.000249888	0.000219664
Butyricimonas faecalis	0.00157627	0.00135332	0.00115362	0.000803854	0.000690367	0.00121605	0.00112054	0.00135765	0.000637642	0.000284202	0.000297244	0.000703494	0.000145958	0.000122331	0.000158211	0.00014255	0.000596549	0.000526651	0.000563357	0.000515224
Christensenella sp. Marseille-P3954	0.00156716	0.00164298	0.00194179	0.00177953	0.00220535	0.00201064	0.00198724	0.00159293	0.00164252	0.0016662	0.0016636	0.00156783	0.00184228	0.00183271	0.00186196	0.00175372	0.00031161	0.00100609	0.000860709	0.00112608
Alistipes sp. Marseille-P5997	0.00155626	0.00140025	0.00121473	0.000799018	0.000928083	0.00152774	0.00137047	0.00174514	0.000827311	0.000304992	0.000385828	0.000851292	0.000196848	0.000226199	0.000214831	0.00020937	0.000187469	0.000463516	0.000364348	0.000345223
Clostridium beijerinckii	0.00152982	0.00162853	0.00143624	0.0016305	0.00159376	0.00149837	0.00169533	0.00144263	0.00149529	0.00176887	0.00168108	0.0014619	0.00181488	0.00175676	0.00196964	0.0017236	0.000165824	0.000679213	0.000524634	0.000660139
Selenomonas ruminantium	0.0015241	0.00149745	0.00143993	0.00165969	0.00154385	0.00144399	0.00156668	0.00139247	0.00148119	0.00165977	0.00163042	0.00146785	0.00180183	0.00186198	0.00193009	0.00182232	0.000173644	0.000687822	0.000551747	0.000644476
Eubacterium limosum	0.00151606	0.00173379	0.00164115	0.00182063	0.00172348	0.00159287	0.00161904	0.00146163	0.00162658	0.00193776	0.00176135	0.0015358	0.00208965	0.00206551	0.00212731	0.00202242	0.000189913	0.000789746	0.000648383	0.00073578
Erysipelotrichaceae bacterium SG0102	0.00147301	0.00154661	0.00148474	0.00170441	0.00154594	0.00147336	0.00154666	0.00153303	0.00154094	0.00185717	0.00167445	0.00155768	0.00168849	0.00171713	0.00157818	0.00165322	0.000232573	0.000677361	0.000625504	0.000800469
Clostridiales bacterium 70B-A	0.00146854	0.00158771	0.00143	0.00178126	0.00187077	0.00147806	0.00165545	0.0020154	0.00221811	0.00255353	0.00223618	0.00213048	0.00188255	0.00183301	0.00198793	0.00175461	0.000179858	0.000542852	0.000453199	0.000621936
Sporanaerobacter sp. NJN-17	0.00145496	0.0013672	0.00129557	0.00132882	0.00152437	0.00129813	0.00143351	0.00126901	0.00126257	0.00154168	0.00141007	0.0012418	0.00140851	0.00149694	0.00160757	0.00143708	0.000145437	0.000589972	0.000499297	0.000559157
Thermoclostridium stercorarium	0.0014162	0.00162353	0.00156387	0.00161997	0.00193946	0.00179395	0.00173972	0.00168669	0.00179909	0.00182952	0.00176461	0.00170128	0.00203354	0.00209253	0.00180967	0.00202527	0.000214699	0.000788265	0.000626256	0.000810402
Proteiniphilum saccharofermentans	0.00140065	0.00126528	0.000879782	0.000593004	0.000498386	0.000908555	0.000869707	0.00104332	0.000596889	0.000217759	0.0002608	0.000662776	6.09558e-05	6.81449e-05	7.1249e-05	5.59507e-05	0.000193264	0.000233748	0.000222638	0.000192413
Christensenella minuta	0.0013651	0.00142441	0.00135825	0.00153967	0.00153324	0.00164943	0.00145082	0.00140142	0.00161509	0.00138972	0.00153973	0.00148031	0.00167899	0.00173394	0.00167936	0.00165393	0.000135592	0.000599877	0.000553454	0.000624993
Clostridium saccharoperbutylacetonicum	0.00135027	0.00151606	0.00131017	0.00159804	0.00150629	0.00140119	0.00154757	0.0013174	0.00149958	0.00167092	0.0015807	0.00154232	0.00154906	0.00159375	0.00165986	0.00149713	0.000143971	0.000580159	0.000406349	0.000589082
Clostridium butyricum	0.00134884	0.00144663	0.00139838	0.00156384	0.00142212	0.00144718	0.00148663	0.00133865	0.00138728	0.00160405	0.00146768	0.0014025	0.00170229	0.00166445	0.00162383	0.00154274	0.000134196	0.000509618	0.000431072	0.000564251
Acetobacterium woodii	0.00131704	0.0016102	0.00147042	0.00183479	0.0019132	0.00169223	0.00170345	0.00161784	0.00166672	0.00199541	0.00180211	0.00168389	0.00177853	0.00203909	0.00209318	0.00172342	0.000142016	0.000869266	0.000691545	0.000733488
Geosporobacter ferrireducens	0.00130704	0.0013672	0.00134307	0.0014402	0.00153168	0.00131743	0.00144043	0.00128642	0.00143339	0.00181795	0.00149275	0.00136221	0.00175299	0.00165844	0.00172257	0.00163772	0.00012065	0.000685693	0.000607543	0.00070942
[Clostridium] cellulosi	0.00130543	0.00147273	0.00155366	0.00152948	0.00176852	0.00162879	0.00158518	0.00144678	0.00155902	0.00168485	0.00160156	0.00146248	0.00198619	0.00204945	0.00207042	0.00193725	0.00021044	0.000821221	0.000723165	0.000750042
Clostridium sp. CT4	0.00127828	0.0014619	0.00115106	0.00144935	0.00146247	0.00144919	0.00130245	0.00139695	0.00133304	0.00181302	0.00148475	0.00133758	0.00137645	0.00161912	0.00157818	0.00134424	0.0001129	0.000572753	0.000385724	0.000462123
Bacteroides dorei	0.00127363	0.00106449	0.00138519	0.000956163	0.000518036	0.000848634	0.000790561	0.000945087	0.00036754	0.00014703	0.000176535	0.000387175	0.000153228	0.000186273	0.000136809	0.000190838	0.00156098	0.00101674	0.00118155	0.00110634
Petrimonas mucosa	0.00126613	0.00110948	0.00076279	0.000537572	0.000499951	0.000865418	0.000853306	0.00106983	0.000524729	0.000192683	0.000236258	0.000579748	9.4323e-05	0.00010657	8.19499e-05	9.56864e-05	0.00019501	0.000240784	0.000241146	0.000225013
Bacteroides vulgatus	0.00121521	0.00102783	0.000919914	0.000622015	0.000630547	0.00093155	0.000805307	0.000942052	0.000303347	0.000156675	0.000161157	0.000354862	0.000148382	0.000160005	0.000150083	0.000159834	0.00486895	0.00286793	0.00347534	0.00319067
Porphyromonas cangingivalis	0.00120663	0.00103922	0.000788316	0.000544479	0.000430567	0.000798615	0.000807263	0.000962178	0.000600413	0.000209615	0.000244895	0.000623943	9.15269e-05	9.33615e-05	0.000101184	9.6221e-05	9.22333e-05	0.000142193	0.000118558	0.00010633
Bacteroides helcogenes	0.00119609	0.000993672	0.000844756	0.000566065	0.000450565	0.000821442	0.000862786	0.000945566	0.000559507	0.000251195	0.000253637	0.000578009	0.000170005	0.000158805	0.000201963	0.000161972	0.000632227	0.000443983	0.000511795	0.000484025
Anaerolineaceae bacterium oral taxon 439	0.0011893	0.00143941	0.0015504	0.0016343	0.00165219	0.00157675	0.00129237	0.0013765	0.00151367	0.00180166	0.00153467	0.00141554	0.0016143	0.00156868	0.00172081	0.00161224	0.000201852	0.000692729	0.000671671	0.000832559
Desulfitobacterium hafniense	0.00116251	0.00113725	0.0011193	0.00125629	0.00131709	0.00118332	0.00124227	0.00102064	0.00111718	0.00130248	0.00118729	0.00111255	0.00115145	0.00160606	0.0013708	0.00136473	0.000150254	0.00066579	0.000623387	0.000644858
Clostridium pasteurianum	0.00110498	0.00126528	0.00114638	0.00127045	0.00137656	0.00118433	0.00135542	0.00128929	0.00130684	0.00159826	0.00139522	0.00134627	0.00142342	0.00129986	0.00159159	0.00130878	0.000164777	0.000514709	0.000438242	0.000575329
Porphyromonas crevioricanis	0.00108247	0.000925354	0.000752863	0.000496645	0.000398048	0.000772431	0.000777169	0.000938698	0.000549242	0.000159462	0.000219089	0.000610322	6.37519e-05	6.96458e-05	4.19909e-05	6.0049e-05	5.50886e-05	0.000133213	9.73189e-05	8.83751e-05
Hungateiclostridium thermocellum	0.00108229	0.00129611	0.00118963	0.0013656	0.00129813	0.00116167	0.00132186	0.00120416	0.00125904	0.00146966	0.00124333	0.00128527	0.00138744	0.00131787	0.00136958	0.00133498	0.000151441	0.000496658	0.000393237	0.000499434
Prevotella oris	0.00105621	0.00087842	0.000771582	0.00051305	0.000439609	0.000767899	0.000685684	0.000854683	0.000432346	0.00018711	0.000220774	0.00047455	0.00012303	0.000104018	9.48181e-05	0.000112614	0.000425209	0.000351502	0.000399861	0.000372602
Bacteroides caccae	0.00105103	0.000932297	0.000986564	0.000692471	0.000626895	0.000978715	0.000879939	0.000986456	0.000389449	0.000179823	0.000202762	0.00048962	0.000122657	0.000129385	0.000114459	0.000130789	0.00692092	0.00393808	0.0049647	0.00450051
Clostridium bornimense	0.00104924	0.00120335	0.00157493	0.00154848	0.00126318	0.00127127	0.00128395	0.00118867	0.00120573	0.00133592	0.00124027	0.00123513	0.00121576	0.00131682	0.00125715	0.00120098	0.000129099	0.000492399	0.000383197	0.000499052
Hungateiclostridium clariflavum	0.0010462	0.00114475	0.00110497	0.00115717	0.00129553	0.00115042	0.00123294	0.00120081	0.00118397	0.00133442	0.00119003	0.0012034	0.00132406	0.00133963	0.0014006	0.00127689	0.000136849	0.000469996	0.000391529	0.00049625
Christensenella massiliensis	0.00100726	0.00113059	0.00108314	0.00108257	0.00112737	0.00102303	0.00110293	0.00093183	0.000988789	0.0011906	0.00107533	0.000987354	0.0014415	0.00143389	0.00138489	0.00147378	0.000138245	0.000580252	0.000539249	0.000607292
Fermentimonas caenicola	0.000963664	0.000807879	0.000655866	0.000450883	0.000349183	0.000645875	0.000635729	0.000767953	0.000448433	0.000142101	0.000197601	0.000493677	6.26335e-05	6.6794e-05	5.25563e-05	5.84453e-05	7.9107e-05	0.000144045	0.000114461	0.000106458
Fibrobacter succinogenes	0.000963664	0.00096229	0.000985572	0.000954608	0.000974166	0.000982911	0.00101401	0.000987414	0.000942981	0.0010185	0.000972206	0.00094229	0.000963549	0.000889636	0.000926508	0.000931383	0.00018691	0.000440003	0.000413725	0.000539037
Dehalobacterium formicoaceticum	0.000934543	0.00092091	0.000908144	0.000980166	0.00101868	0.000912751	0.00090928	0.000790315	0.000831754	0.000880683	0.000873827	0.000772466	0.00105396	0.00113235	0.00108323	0.00110226	9.99834e-05	0.000437318	0.000397471	0.000432707
Syntrophobotulus glycolicus	0.000920072	0.00102283	0.000915235	0.000907811	0.00111346	0.00107758	0.00111708	0.00102048	0.00110538	0.00114259	0.00117339	0.00104981	0.000997289	0.00115336	0.0010728	0.00103723	8.9999e-05	0.000447779	0.000382241	0.000458812
Porphyromonas asaccharolytica	0.000919179	0.000795104	0.00056837	0.000386471	0.000304492	0.000587464	0.000572532	0.000708855	0.000385465	0.000139743	0.000170426	0.000435572	7.75462e-05	5.7788e-05	6.33927e-05	5.77326e-05	6.36766e-05	0.000119698	9.10359e-05	8.26447e-05
Burkholderiales bacterium YL45	0.00091632	0.000906747	0.000524126	0.000623051	0.000284842	0.000408203	0.000458327	0.000667647	0.000214641	0.00018411	0.000176535	0.000208512	0.00234615	0.00338548	0.00182186	0.00416762	0.0123813	0.00064172	0.000996887	0.0026296
Cellulosilyticum sp. WCF-2	0.000911139	0.00103033	0.0009972	0.00109466	0.00108355	0.000929536	0.000974132	0.000935025	0.00110109	0.00125255	0.00101781	0.00106575	0.00124745	0.00137911	0.00121245	0.00126976	7.43592e-05	0.000413897	0.000321801	0.000391575
Prevotella sp. oral taxon 299	0.000906673	0.000795104	0.00068678	0.000454164	0.000358748	0.000768906	0.000719389	0.000898128	0.000573296	0.000207043	0.000228569	0.000614959	7.54957e-05	7.39987e-05	7.8699e-05	7.78677e-05	7.73615e-05	0.000129973	0.000108519	9.79257e-05
Megamonas hypermegale	0.00089113	0.000983952	0.00101322	0.00107186	0.000955733	0.000932893	0.000907625	0.000882635	0.000975767	0.00123604	0.00102245	0.000913165	0.00112237	0.00108476	0.00103487	0.00107108	0.000120022	0.000428523	0.000358543	0.00044595
Slackia heliotrinireducens	0.000885234	0.000865922	0.000940618	0.000914373	0.000976426	0.000948838	0.000891224	0.00084526	0.000867297	0.000922263	0.00091459	0.000852886	0.000933723	0.000981646	0.000984483	0.000934234	0.000159471	0.000485919	0.00044514	0.00049867
Mucinivorans hirudinis	0.000877374	0.000781496	0.000599426	0.000446221	0.000383789	0.000634461	0.000587429	0.00066573	0.000370911	0.000163534	0.000186331	0.000420937	0.000104016	0.000123531	0.000111885	0.000105665	0.000605696	0.000421303	0.000467404	0.000439965
Clostridium kluyveri	0.000872371	0.00100395	0.00104797	0.00107722	0.00106459	0.00100238	0.00111843	0.000932309	0.000950794	0.0011083	0.0010175	0.000918237	0.00131083	0.00131667	0.00116206	0.00130985	0.000135662	0.000351687	0.000321801	0.000499943
Clostridium perfringens	0.000868084	0.00102644	0.000981743	0.00108965	0.00105659	0.00109688	0.00113589	0.000878323	0.000837729	0.00109244	0.000963674	0.000838251	0.00136041	0.00111553	0.00130063	0.00115679	0.000188865	0.000488048	0.000393646	0.000547569
Treponema succinifaciens	0.00086058	0.00100478	0.0010335	0.00105649	0.00102894	0.000910737	0.000990533	0.00101313	0.00110354	0.00114409	0.0011459	0.00110632	0.00108788	0.00107171	0.000994371	0.00102654	0.000134196	0.000395845	0.000350621	0.000419973
Olsenella sp. Marseille-P2300	0.000850039	0.000905358	0.000916085	0.000952882	0.00102181	0.000882203	0.00086745	0.000836315	0.000956157	0.00106308	0.00104583	0.000973734	0.00111585	0.00102382	0.00110043	0.00112026	9.09765e-05	0.000481568	0.000413042	0.000474093
Acidaminococcus intestini	0.000849504	0.00105782	0.00101691	0.00116701	0.0012797	0.000994492	0.00113002	0.00113149	0.00120251	0.00134106	0.00128536	0.00123586	0.00115909	0.00105865	0.00116071	0.00114467	0.000147112	0.000519246	0.000536517	0.000649952
Megasphaera stantonii	0.000841464	0.000974787	0.00095877	0.00111849	0.00126266	0.00108849	0.00106742	0.00101105	0.00119209	0.00124654	0.00121068	0.00109516	0.00130393	0.00125573	0.00135441	0.0013781	8.25282e-05	0.000655607	0.000533239	0.000588064
Treponema brennaborense	0.000832889	0.000903414	0.000903464	0.000884498	0.00106094	0.000996674	0.000997605	0.000910587	0.000988943	0.00109973	0.00102213	0.000940986	0.00118612	0.00104769	0.00112387	0.00112151	0.000164637	0.000444168	0.000394398	0.000520445
Bacteroides zoogleoformans	0.000830566	0.000679574	0.000535329	0.00035228	0.000298232	0.0005737	0.000541837	0.00063091	0.000349462	0.000117239	0.000143777	0.000388334	4.828e-05	5.29849e-05	4.37518e-05	4.43686e-05	0.000469126	0.000329284	0.000364826	0.000326377
Candidatus Azobacteroides pseudotrichonymphae	0.000829316	0.000717899	0.000489808	0.000332593	0.000223804	0.000450669	0.000437562	0.000521339	0.000286035	0.000110166	0.000120393	0.000323274	2.18099e-05	2.04134e-05	2.04536e-05	2.04915e-05	4.54533e-05	8.82227e-05	8.09966e-05	7.92065e-05
Ndongobacter massiliensis	0.000823777	0.000961179	0.000957494	0.00104561	0.000965993	0.000908051	0.000941481	0.00089733	0.000951407	0.00111366	0.000925966	0.000955476	0.00104016	0.00110803	0.0010663	0.00102921	0.000112691	0.000504711	0.000400134	0.000458302
Bacteroides heparinolyticus	0.000815559	0.00066791	0.000328713	0.000208777	0.000205023	0.00039444	0.000372108	0.000455214	0.000209739	9.04473e-05	0.000100065	0.000242564	4.23149e-05	4.23279e-05	2.89872e-05	4.18739e-05	0.000129308	0.000120901	0.000125183	0.000105184
Cloacibacillus porcorum	0.000797872	0.000868422	0.000975078	0.000844953	0.000971731	0.000853837	0.0008673	0.000768592	0.000855194	0.000914547	0.00092586	0.000848394	0.00139639	0.0013608	0.00146426	0.00148519	0.000121767	0.000478606	0.000466926	0.000546805
Prevotella enoeca	0.000797694	0.000702902	0.000498316	0.000342954	0.000350227	0.000677765	0.00063287	0.000830725	0.000445522	0.000152174	0.000188964	0.000489185	7.06491e-05	8.54062e-05	9.63081e-05	8.2857e-05	0.000131403	0.000168669	0.000160764	0.000143259
Dehalococcoides mccartyi	0.000792513	0.00102478	0.0010206	0.00110899	0.000908259	0.000849473	0.000907174	0.000806926	0.000830834	0.00122361	0.000872774	0.000734212	0.000957024	0.00104394	0.000920142	0.000898597	0.000114436	0.000569328	0.000470272	0.000554573
Marinifilaceae bacterium SPP2	0.00078751	0.000721787	0.000573333	0.000415137	0.000332663	0.000558594	0.000534915	0.000682661	0.000444603	0.000252695	0.00023373	0.000495996	0.000121539	0.000125783	0.000117574	0.000118316	4.81065e-05	9.64617e-05	7.78551e-05	7.94612e-05
[Eubacterium] sulci	0.000781257	0.000829264	0.000942462	0.000858077	0.000927736	0.000879014	0.000888365	0.000791592	0.000783187	0.000836745	0.000812524	0.000759425	0.000968209	0.00107846	0.000972969	0.00104703	0.000122117	0.000404732	0.000366465	0.00046658
Mogibacterium diversum	0.000770895	0.000909246	0.000961181	0.00097654	0.00108633	0.000988786	0.000945844	0.000894774	0.000933022	0.00104572	0.000973365	0.000897081	0.0010603	0.000968287	0.000991526	0.00102725	0.00011681	0.000503786	0.000405256	0.000480205
Alkalitalea saponilacus	0.000770359	0.000650691	0.000477471	0.000330866	0.000330403	0.000537446	0.000527241	0.000637938	0.000359727	0.000142315	0.00017959	0.000391522	9.0222e-05	0.000100116	0.000104029	9.76465e-05	6.87037e-05	0.000129325	0.000104285	9.74163e-05
Bacteroidales bacterium CF	0.000768752	0.000689572	0.00055504	0.000389925	0.000298058	0.000528718	0.00051385	0.000617174	0.000349309	0.000148531	0.000160209	0.000367903	9.67463e-05	9.15603e-05	0.000136673	8.71334e-05	0.000243256	0.000221158	0.000218472	0.000209095
Alkaliphilus metalliredigens	0.000768573	0.000809546	0.000744638	0.000823885	0.00093017	0.000734162	0.000746624	0.00108261	0.001123	0.00147009	0.00112789	0.00109313	0.000937452	0.000900743	0.000973104	0.000889331	0.000131892	0.000380015	0.000307459	0.000366999
Draconibacterium orientale	0.000755352	0.00067402	0.000522282	0.00038509	0.000303623	0.000502869	0.000485562	0.000602958	0.000314531	0.000163963	0.000187384	0.000342401	0.000138688	0.000125933	0.000119471	0.000128295	0.000103265	0.000168484	0.000154891	0.000181462
Clostridium estertheticum	0.000751779	0.000803991	0.000753005	0.000835628	0.000891565	0.000803483	0.000885506	0.000790155	0.000786558	0.00092805	0.000848337	0.000838831	0.000903152	0.000936466	0.000908493	0.000882204	0.000103335	0.000369832	0.000304045	0.000397306
Clostridium sporogenes	0.000750707	0.000798159	0.000767612	0.000858077	0.000824789	0.00077411	0.000840216	0.000743995	0.000793759	0.000904902	0.00084149	0.000746384	0.000997102	0.000966486	0.000917704	0.000933878	7.94561e-05	0.000369184	0.000286015	0.000362924
Fastidiosipila sanguinis	0.000743383	0.000735395	0.000689191	0.000802645	0.000765664	0.000686829	0.000705546	0.000634743	0.000703827	0.00076966	0.000746692	0.000702479	0.00086643	0.000857515	0.000938157	0.000972901	0.00014013	0.000388161	0.000388251	0.000491666
Erysipelotrichaceae bacterium GAM147	0.000722123	0.000726786	0.000588507	0.000699724	0.000728625	0.000696564	0.000676506	0.000666528	0.000829302	0.0007568	0.000784822	0.000736096	0.00117158	0.00129896	0.00130619	0.00126531	0.000102427	0.000416026	0.000309781	0.000382407
Selenomonas sputigena	0.00071319	0.000767888	0.000813841	0.000802299	0.000792444	0.000719391	0.000855714	0.000761405	0.000774608	0.000889041	0.000855499	0.000771597	0.0011233	0.00103343	0.00108553	0.00103936	7.72916e-05	0.000316787	0.00026102	0.000376422
Mageeibacillus indolicus	0.000711046	0.000779275	0.000847166	0.000849097	0.00110476	0.00100876	0.000884604	0.000894295	0.000975307	0.000973702	0.00104236	0.000936784	0.000947518	0.000951176	0.000885601	0.000941184	0.000111783	0.000539982	0.000498204	0.00051446
Clostridium acetobutylicum	0.000700684	0.000775942	0.000719538	0.000816978	0.00078288	0.000736176	0.000780931	0.000790953	0.000801878	0.000916261	0.000772709	0.000797969	0.000696425	0.000733983	0.000637719	0.000675863	8.62985e-05	0.000209494	0.000187399	0.000263088
Streptococcus suis	0.000695324	0.000741505	0.00070635	0.000764308	0.000749492	0.000662156	0.000736543	0.000706779	0.000775987	0.000973059	0.000802518	0.000729431	0.000932046	0.000979245	0.000941408	0.000907506	7.77804e-05	0.000329284	0.000275361	0.000332489
Olsenella sp. oral taxon 807	0.000690143	0.000777053	0.000795264	0.000747213	0.000911737	0.000888245	0.000830736	0.000847336	0.000870361	0.000967058	0.000919646	0.000872303	0.000983122	0.00102608	0.00095387	0.00108106	8.42737e-05	0.000409638	0.00035786	0.000400617
Sphaerochaeta pleomorpha	0.000680496	0.000762334	0.000734428	0.000763963	0.000822181	0.000758164	0.000745872	0.000685216	0.000780123	0.000835459	0.000768285	0.000782754	0.000857296	0.000844756	0.000894405	0.000868127	9.89361e-05	0.000449723	0.000396651	0.000412459
Peptoclostridium acidaminophilum	0.000674243	0.00067152	0.000648917	0.000725281	0.000725147	0.000638489	0.000734587	0.000591298	0.000631667	0.0007583	0.000643678	0.000621335	0.000821691	0.000857965	0.000864876	0.000801663	7.46384e-05	0.00030753	0.00026382	0.000306893
Parabacteroides distasonis	0.000671206	0.000491837	0.000394512	0.000288558	0.000234064	0.00260146	0.00159406	0.000277441	0.000135587	0.000121525	9.81686e-05	0.000174171	0.000118556	0.000118278	0.000136809	0.000121345	0.000760279	0.000473977	0.00056725	0.000527831
Collinsella aerofaciens	0.000671027	0.000698737	0.000704223	0.000758264	0.000768273	0.000732316	0.000711114	0.000619729	0.000744273	0.000761944	0.000734895	0.000694075	0.000825979	0.000910049	0.00087788	0.000846566	9.05576e-05	0.000349188	0.000311489	0.000355665
Clostridium sp. BNL1100	0.000652983	0.000778997	0.000755558	0.000848061	0.000836266	0.000780152	0.00082562	0.000772745	0.000801725	0.000872967	0.000829377	0.000808981	0.000806406	0.000807081	0.000855936	0.000750345	0.000113878	0.000345855	0.000289771	0.000368399
Clostridium sp. JN-9	0.000647981	0.000675964	0.000699401	0.000788657	0.000696975	0.000746918	0.000717132	0.000612701	0.000585246	0.000663138	0.000655792	0.00060612	0.000683749	0.000675445	0.000663727	0.000666419	0.000105918	0.000268186	0.000235546	0.000322811
Eubacterium callanderi	0.000645122	0.000736228	0.000707343	0.000759301	0.000862525	0.000704957	0.000803802	0.000544819	0.000689732	0.000780162	0.000724151	0.000623508	0.000948636	0.000931964	0.000948994	0.000869909	7.80597e-05	0.000526003	0.00050879	0.000494595
Eggerthella sp. YY7918	0.000644586	0.000646526	0.000679832	0.000646018	0.00060568	0.000554062	0.00062309	0.000500415	0.000553685	0.000589194	0.000549828	0.000521788	0.000757567	0.000697359	0.000733079	0.000776539	5.89288e-05	0.000315121	0.000273312	0.000317463
Treponema primitia	0.000634403	0.000775664	0.000739959	0.000799536	0.000915215	0.000844437	0.000745872	0.000736807	0.000807853	0.000911332	0.000827797	0.000814632	0.000873513	0.000855413	0.000965113	0.000921583	7.22645e-05	0.000412045	0.000325831	0.000402145
Eggerthella lenta	0.000632081	0.000654857	0.000651612	0.000633412	0.000601854	0.000560608	0.000595554	0.000594653	0.000572223	0.000642133	0.000610183	0.000616263	0.000621488	0.000654431	0.000669416	0.000665707	4.61516e-05	0.000249208	0.00021615	0.000224503
Murdochiella vaginalis	0.000629579	0.00062292	0.000636155	0.000672267	0.000794705	0.000689179	0.000737747	0.000655348	0.000713938	0.000896972	0.00079051	0.00067234	0.000945094	0.000928661	0.00102282	0.000942609	9.45374e-05	0.000353261	0.000330133	0.00037413
Clostridium isatidis	0.000629222	0.000649025	0.000641969	0.000683837	0.000683585	0.000853837	0.00074527	0.000654869	0.000595204	0.000684571	0.000584798	0.00057714	0.000645348	0.000646025	0.000667926	0.000589799	9.50959e-05	0.000256059	0.000217926	0.000298361
Treponema azotonutricium	0.000627972	0.000749836	0.000720815	0.000709049	0.0008034	0.000792069	0.000721947	0.000640653	0.000715777	0.000786592	0.00070793	0.000679875	0.000911541	0.000937067	0.000969583	0.000925681	7.03794e-05	0.000340578	0.000246063	0.000350571
Prevotella denticola	0.000627793	0.0005621	0.000441451	0.000314289	0.000270582	0.00045755	0.000455468	0.000546097	0.000330005	0.000155175	0.000151255	0.000358485	8.27657e-05	9.09599e-05	7.51772e-05	8.1966e-05	5.39715e-05	9.38697e-05	7.55331e-05	6.68543e-05
Filifactor alocis	0.000626542	0.00060709	0.000678839	0.000680728	0.000688628	0.000644196	0.000685835	0.000655348	0.000677629	0.000744583	0.000712249	0.000667123	0.000741536	0.000643323	0.000829794	0.000688515	5.87193e-05	0.00024782	0.000213487	0.000235582
Lactobacillus delbrueckii	0.000619932	0.000496558	0.000626795	0.000518058	0.000660979	0.000512604	0.000556884	0.000586507	0.000675177	0.000762801	0.000674962	0.00058424	0.000467141	0.000525646	0.000416929	0.000508189	6.08139e-05	0.00024495	0.000208092	0.000253537
Cellulosilyticum lentocellum	0.00061618	0.000645415	0.000654023	0.000664669	0.000647937	0.000638657	0.000660406	0.000659021	0.000650971	0.000719721	0.00070614	0.000686685	0.000784782	0.000769407	0.000897115	0.000725934	0.000118975	0.000282442	0.000259176	0.000370437
Acidaminococcus fermentans	0.000610999	0.000673464	0.000703514	0.000686945	0.000835397	0.000771592	0.00071954	0.00063075	0.000712406	0.000768802	0.000743006	0.000651909	0.00102786	0.000963784	0.0009792	0.00108409	0.000108292	0.000439169	0.000401159	0.000483643
Ornithobacterium rhinotracheale	0.000604568	0.00048295	0.00042259	0.000304618	0.000134248	0.00024321	0.000237891	0.000275843	0.00016439	6.83713e-05	7.97357e-05	0.000175185	4.64159e-05	3.75247e-05	4.47e-05	4.11612e-05	0.000278794	0.000174686	0.000206658	0.000190121
Hungateiclostridium saccincola	0.000603317	0.000579874	0.000650761	0.000595421	0.000707409	0.000653931	0.000657095	0.000581396	0.000571457	0.000654779	0.000612606	0.000529468	0.000672937	0.00066839	0.00060521	0.000627753	9.50261e-05	0.000270037	0.000237253	0.00031135
Gottschalkia acidurici	0.000597958	0.000582095	0.000585387	0.000649127	0.000710018	0.00063295	0.000675904	0.000633306	0.000615734	0.000730652	0.000648524	0.000611047	0.000733147	0.000700961	0.000737278	0.000661786	8.76949e-05	0.000259762	0.000236775	0.00029938
Gordonibacter massiliensis	0.000595992	0.000530162	0.000648492	0.000593522	0.000539947	0.000553223	0.000511593	0.000461283	0.000504353	0.000569261	0.000504957	0.000475275	0.000529588	0.000515139	0.000540463	0.000499636	5.36922e-05	0.000227361	0.000192657	0.000239402
Paeniclostridium sordellii	0.000593491	0.000631807	0.000637431	0.000669849	0.000676108	0.000707474	0.000707201	0.000617174	0.000580037	0.000744583	0.000637253	0.000571199	0.000811066	0.000840403	0.000808527	0.000778143	0.000115972	0.000294384	0.000270376	0.000388519
Mahella australiensis	0.000587417	0.000700403	0.000766052	0.000851342	0.000919562	0.000758164	0.000869707	0.000709814	0.000677629	0.000841675	0.000736475	0.000715375	0.000743586	0.000781565	0.00075421	0.000734843	0.000102218	0.000413249	0.000296942	0.000404055
Clostridium argentinense	0.00058563	0.000622642	0.000574893	0.000620634	0.000803922	0.000783005	0.000700581	0.000618292	0.000734468	0.000704932	0.000697924	0.000669007	0.000800814	0.000768656	0.000843475	0.000746247	9.16049e-05	0.000273463	0.00023459	0.000331725
Tepidanaerobacter acetatoxydans	0.000568301	0.000721232	0.000673876	0.000725799	0.000853656	0.000758668	0.000813733	0.000743995	0.00072022	0.000947554	0.000822215	0.00074537	0.000940807	0.00102022	0.0011003	0.000968446	8.17602e-05	0.000397604	0.000298171	0.000394759
Dialister sp. Marseille-P5638	0.000566693	0.000687072	0.000553055	0.000681074	0.000507429	0.000520325	0.000611804	0.000475658	0.000533769	0.000823456	0.000544983	0.000561636	0.000671259	0.000643624	0.000664539	0.000673012	7.27533e-05	0.000309937	0.000261088	0.000276331
Megasphaera elsdenii	0.000556688	0.000656524	0.000677421	0.000630477	0.000779924	0.000645707	0.000645509	0.000660299	0.0006882	0.000762587	0.000755435	0.000634231	0.000855804	0.000732032	0.000812862	0.000785983	0.000112062	0.000315676	0.000278435	0.000401635
Acetoanaerobium sticklandii	0.000549363	0.000588205	0.000585103	0.000631858	0.000699236	0.000666184	0.00063603	0.000590819	0.000626152	0.000784448	0.000652421	0.000593369	0.000678156	0.000718223	0.000666842	0.000658935	8.79742e-05	0.00024856	0.000232609	0.000304346
Salinivirga cyanobacteriivorans	0.0005365	0.000482673	0.000354664	0.000271635	0.000241889	0.00042331	0.000410327	0.000500415	0.000293695	0.000134385	0.000159577	0.000310088	0.000105135	0.000122631	0.000113917	0.000115822	2.87662e-05	6.62827e-05	6.35817e-05	5.98506e-05
Sediminispirochaeta smaragdinae	0.000536322	0.000627641	0.000622966	0.000543788	0.00059229	0.000587296	0.000650926	0.00052102	0.000584633	0.00061277	0.000668115	0.000593079	0.000735757	0.000658934	0.000766807	0.000687802	7.37308e-05	0.000375571	0.000333889	0.000385463
Clostridium baratii	0.000527746	0.000551824	0.000569646	0.000600947	0.000562902	0.000739869	0.000666575	0.000568937	0.0004803	0.000522966	0.000485682	0.000468899	0.000639011	0.00065353	0.000616724	0.000624189	8.96499e-05	0.000241247	0.00020495	0.000283972
Halocella sp. SP3-1	0.000519885	0.000530718	0.000565959	0.00056641	0.000617157	0.000617173	0.000575241	0.000529964	0.000508336	0.000611698	0.000573212	0.000513384	0.000828775	0.000836651	0.000813133	0.000859574	0.000102846	0.00032373	0.000284103	0.000352482
Clostridium saccharobutylicum	0.00050863	0.000561267	0.000498742	0.000580052	0.000570901	0.000567322	0.000601874	0.000553124	0.000573602	0.000712219	0.000608393	0.000588732	0.000750483	0.000747192	0.00085553	0.000734309	4.55232e-05	0.000260132	0.000186306	0.000218264
Desulfallas gibsoniae	0.000507916	0.000644582	0.00055972	0.000668813	0.000708974	0.000616334	0.000667327	0.00063682	0.000663074	0.000887113	0.000743638	0.000631478	0.000626894	0.00059259	0.000682826	0.000644502	7.81993e-05	0.000360204	0.000261293	0.000350953
Clostridium carboxidivorans	0.000497375	0.000524608	0.000518595	0.000594213	0.000678021	0.000613816	0.000640243	0.000666848	0.000720679	0.000891613	0.00075554	0.000700885	0.000693628	0.000669441	0.000756784	0.000693147	4.78971e-05	0.000199774	0.00015571	0.000192413
Sphaerochaeta coccoides	0.000497375	0.000540993	0.000514199	0.000486284	0.000644981	0.000615159	0.000545598	0.000486519	0.000609299	0.000606769	0.000566681	0.000609308	0.000765955	0.00068295	0.000806766	0.000683525	9.05576e-05	0.000299846	0.000267781	0.00030129
Sorangium cellulosum	0.000495588	0.0005621	0.00056128	0.000521685	0.000576465	0.000601731	0.000595253	0.000518624	0.000549855	0.000528752	0.000515174	0.000551058	0.000534435	0.000572627	0.000547507	0.000570911	7.17758e-05	0.000290126	0.000248658	0.000265889
Megasphaera hexanoica	0.000488978	0.000572653	0.000595172	0.000627714	0.000680629	0.000640336	0.000633021	0.000502172	0.000573296	0.000531539	0.000586378	0.000554391	0.000664735	0.000638971	0.000639345	0.000643968	7.80597e-05	0.000319935	0.000276249	0.000347261
Clostridium formicaceticum	0.000474864	0.000585983	0.000548659	0.000594731	0.00065298	0.000589142	0.000572382	0.00052661	0.000633352	0.000643419	0.000630723	0.000578734	0.000598373	0.000630115	0.000552654	0.000669805	3.9728e-05	0.000187832	0.000151203	0.000187192
Soehngenia sp. W6	0.000472542	0.000554046	0.000560003	0.000623051	0.000737319	0.000665681	0.000631817	0.000560791	0.000595664	0.000674068	0.000627247	0.00054845	0.000719166	0.000796724	0.000733621	0.000672656	0.000135033	0.000362241	0.000318045	0.000436145
Selenomonas sp. oral taxon 920	0.000463073	0.000513499	0.000492644	0.000508733	0.000519775	0.000463593	0.000526038	0.000502652	0.000534535	0.000668924	0.000519177	0.000566272	0.000626521	0.000587637	0.000595864	0.000619378	4.49646e-05	0.000183296	0.000142188	0.000204001
Alkaliphilus oremlandii	0.000461644	0.000510722	0.000565534	0.000558639	0.000611419	0.000571351	0.000592545	0.000511436	0.000552919	0.000661852	0.000588696	0.000527439	0.00064162	0.000611953	0.000680658	0.000611003	6.39559e-05	0.000204588	0.000189106	0.000256211
Fusobacterium nucleatum	0.000458607	0.00052433	0.000523417	0.000551214	0.000589508	0.00053006	0.000559742	0.000545298	0.000564256	0.0011083	0.000608919	0.000530482	0.000629317	0.000654881	0.000710052	0.000639513	6.87037e-05	0.000319194	0.000253507	0.00030371
Victivallales bacterium CCUG 44730	0.00045825	0.000414076	0.000348424	0.00033881	0.00037892	0.000376816	0.000365939	0.000372476	0.000321119	0.000290417	0.000325052	0.000303857	0.000370954	0.000435887	0.00038442	0.000412681	7.3661e-05	0.000177927	0.000166842	0.00021699
Denitrobacterium detoxificans	0.000453247	0.000553213	0.000510087	0.000472814	0.000474215	0.000406525	0.00044343	0.000429658	0.000456859	0.000481814	0.000459665	0.000453684	0.000362566	0.000339223	0.000340397	0.000367243	5.16674e-05	0.000159042	0.000140276	0.000169874
Desulfosporosinus orientis	0.000449138	0.000531273	0.000509378	0.00053878	0.000572118	0.000516968	0.000467355	0.000450422	0.000558128	0.000600982	0.000519704	0.000514688	0.000570785	0.000567674	0.000635417	0.000560754	5.92779e-05	0.000254948	0.000217789	0.00026105
Sphaerochaeta globosa	0.000447888	0.00054627	0.000514341	0.000553286	0.00054899	0.000552048	0.000532809	0.000464478	0.00052856	0.000620057	0.000554568	0.000502081	0.000731469	0.000721975	0.000788345	0.000730745	9.04878e-05	0.000277443	0.000281098	0.000325867
Desulfotomaculum ruminis	0.000444314	0.000488505	0.000491226	0.000522203	0.000443783	0.000437241	0.000490677	0.000439081	0.000399714	0.000520179	0.000427328	0.000454989	0.000572835	0.000611352	0.00053965	0.000607796	4.88746e-05	0.000196441	0.000193067	0.000238511
Desulfitobacterium dichloroeliminans	0.000443957	0.000460455	0.000473925	0.000570727	0.000506907	0.000446976	0.000492032	0.000361615	0.000428823	0.000534111	0.000507064	0.000424125	0.000492679	0.000506734	0.00050687	0.000466137	6.55617e-05	0.000238099	0.00024661	0.000283208
Heliobacterium modesticaldum	0.000438419	0.000620976	0.00051661	0.000592831	0.000505168	0.000534928	0.000523179	0.000552645	0.000504506	0.000640204	0.000485998	0.000501502	0.000499763	0.000503281	0.000503349	0.000480927	5.70436e-05	0.000221992	0.000163974	0.000214571
Listeria monocytogenes	0.000437704	0.000506001	0.00045237	0.000523929	0.000460825	0.000461747	0.000480596	0.000495464	0.000502974	0.00057119	0.000462509	0.000530482	0.000598187	0.000627113	0.000641648	0.000607083	6.20009e-05	0.000198293	0.000169642	0.000211514
Olsenella uli	0.000432881	0.000455179	0.00051973	0.00044553	0.000523079	0.000456208	0.000490376	0.000431255	0.000473712	0.000477742	0.000530237	0.000498604	0.000572276	0.00054726	0.000585976	0.000605301	8.30868e-05	0.000284664	0.000253712	0.000259904
Paenibacillus lentus	0.000432881	0.000419353	0.000379764	0.000411165	0.000487431	0.00036171	0.000441173	0.00049227	0.000480453	0.000635703	0.000524128	0.000472666	0.000457448	0.000446394	0.000509444	0.000460435	2.73698e-05	0.000146451	0.000124978	0.000123012
Paenibacillus mucilaginosus	0.000432702	0.000499058	0.000392102	0.00046418	0.000576639	0.000518982	0.000538827	0.000522298	0.000542961	0.000600767	0.000534345	0.000544827	0.000483918	0.000568874	0.000449438	0.000504804	5.14579e-05	0.000186351	0.00015291	0.000211896
Ruminiclostridium cellulolyticum	0.000431987	0.000482673	0.000448825	0.000534291	0.000566032	0.000528718	0.000541235	0.000508242	0.000524576	0.000563688	0.00054709	0.000510486	0.00062969	0.000651879	0.000685535	0.000570555	4.88746e-05	0.000235415	0.000163974	0.000209732
Desulfitobacterium metallireducens	0.000428771	0.000414076	0.000408268	0.000411511	0.000423785	0.000423981	0.000428684	0.000396116	0.000415034	0.000495317	0.000437124	0.000406737	0.000528283	0.000538404	0.000583131	0.000547747	5.39715e-05	0.000225695	0.000169369	0.000219537
Parabacteroides sp. CT06	0.000428057	0.000351035	0.000376219	0.000266282	0.000212327	0.000725098	0.000528144	0.000335421	0.000151061	8.61607e-05	8.79515e-05	0.000146785	6.84122e-05	6.93457e-05	6.28508e-05	7.44822e-05	0.000902713	0.000569328	0.000669281	0.000613914
Prevotella jejuni	0.000428057	0.000392692	0.000198249	0.000151964	0.000172679	0.000286011	0.000243157	0.000317691	0.00013574	6.66567e-05	6.62533e-05	0.000133309	3.67226e-05	4.38289e-05	3.94172e-05	3.83102e-05	9.30711e-05	0.000109977	0.000109544	9.91991e-05
Coriobacterium glomerans	0.000426985	0.000407689	0.000474776	0.000433787	0.000480301	0.00044043	0.000440722	0.000368004	0.000475091	0.000503247	0.000485155	0.000447744	0.000573394	0.000529248	0.000583267	0.000527255	6.41653e-05	0.00026365	0.000238824	0.000278751
Olsenella sp. GAM18	0.000426092	0.000479618	0.000560003	0.0004552	0.000504994	0.000471817	0.000451104	0.000441637	0.000451957	0.000562188	0.000532659	0.000470928	0.00054767	0.000459452	0.0004428	0.000574653	6.54221e-05	0.000249856	0.000253712	0.00024908
Thermobacillus composti	0.000423769	0.000432128	0.000295672	0.000347617	0.000354052	0.000291718	0.000364134	0.000338136	0.000336899	0.000390295	0.000372135	0.000371381	0.000415133	0.000445493	0.000459055	0.000458119	2.7649e-05	0.000146822	0.000111934	0.000146443
Sebaldella termitidis	0.000414658	0.000414354	0.00046329	0.00049889	0.000465694	0.000405182	0.000445537	0.000354747	0.000391594	0.000506891	0.000433016	0.000396738	0.000549907	0.000542907	0.000523125	0.000536699	5.45301e-05	0.000202366	0.000165613	0.000244623
Desulfofarcimen acetoxidans	0.000412157	0.000432128	0.000514766	0.000562956	0.000489344	0.000470139	0.000472471	0.000436526	0.000441998	0.000509463	0.000473042	0.000471217	0.000410287	0.000422678	0.000465692	0.00041963	5.81607e-05	0.00018885	0.000178042	0.00022705
Fusobacterium necrophorum	0.000412157	0.000456845	0.000440742	0.000490083	0.000423437	0.000385376	0.000418603	0.000360178	0.000349922	0.000428017	0.000391832	0.00034298	0.000600051	0.000630115	0.000604939	0.000647353	6.22802e-05	0.000216437	0.00021417	0.000273402
Parolsenella catena	0.000411085	0.000477951	0.00045705	0.000397696	0.000477171	0.000412232	0.000453662	0.000340532	0.000411051	0.000394582	0.000429014	0.000423835	0.000643671	0.000617206	0.000610493	0.000597105	5.36224e-05	0.000208106	0.000218677	0.0002352
Paenibacillus donghaensis	0.000409477	0.000448236	0.000389833	0.000464525	0.00042222	0.000423813	0.000496997	0.000418158	0.000443071	0.000629059	0.000528025	0.000432094	0.000527911	0.000528648	0.000520958	0.000538837	7.56858e-05	0.000182648	0.000166432	0.000231252
Prevotella melaninogenica	0.000402509	0.000325762	0.000249442	0.00018322	0.000185025	0.000303131	0.000311169	0.000377747	0.000223221	7.58729e-05	9.40607e-05	0.000232131	5.55499e-05	6.04898e-05	5.43172e-05	5.55943e-05	0.000116112	0.000124419	0.000122656	0.000100218
Gordonibacter urolithinfaciens	0.000400187	0.000402135	0.000432517	0.000401668	0.000416655	0.00037262	0.000407468	0.00032999	0.000374588	0.000431661	0.000413741	0.000369497	0.000470124	0.00047161	0.000498743	0.000498211	4.76178e-05	0.0002007	0.000162881	0.000218646
Desulfosporosinus meridiei	0.000392505	0.000413521	0.000483994	0.00046867	0.000466041	0.000452851	0.00041755	0.000385095	0.000392819	0.000479671	0.000438072	0.000383118	0.000409541	0.000442942	0.000425598	0.000435845	8.90215e-05	0.000240599	0.000226736	0.000296706
Bifidobacterium bifidum	0.000390182	0.000400746	0.000331549	0.000423081	0.000428828	0.000343582	0.000353601	0.000361136	0.000387917	0.000405513	0.000420482	0.000415431	0.000383257	0.000451347	0.000420857	0.000421056	1.99688e-05	0.000157283	0.000125866	0.000114735
Lactococcus lactis	0.000388574	0.000352701	0.000395505	0.000354179	0.000421002	0.00041005	0.000410478	0.000357462	0.000379797	0.000399083	0.000399416	0.000324868	0.000438434	0.000443242	0.000448354	0.000438518	0.000104173	0.000212364	0.000198394	0.000254301
Paenibacillus riograndensis	0.000386609	0.000417687	0.000360762	0.000438795	0.000394744	0.000333679	0.000407468	0.000411928	0.000412889	0.000477742	0.000469987	0.000417604	0.000539654	0.000520092	0.000580287	0.000527612	2.45071e-05	0.000200607	0.000123407	0.000115244
Clostridium cochlearium	0.000380356	0.000228284	0.000320914	0.000219657	0.000185547	0.000198898	0.000230217	0.00018528	0.000189515	0.00023662	0.000198338	0.000208222	0.000263769	0.000261922	0.000270638	0.00025944	3.12099e-05	9.76652e-05	8.96017e-05	0.000110278
Clostridiaceae bacterium 14S0207	0.000379999	0.000458511	0.000435211	0.000504761	0.000453173	0.000478531	0.000501361	0.000409213	0.000438628	0.000487387	0.000421008	0.00040978	0.000400593	0.00042553	0.000417335	0.000403059	5.55774e-05	0.000176538	0.000144783	0.000190376
Paenibacillus baekrokdamisoli	0.00037321	0.000411299	0.000319495	0.000394415	0.000456129	0.000415757	0.000415443	0.000425345	0.000509868	0.000503462	0.000450185	0.000513094	0.00038102	0.000476264	0.000335791	0.000424441	7.54763e-05	0.000162559	0.000157486	0.000204001
Thermoanaerobacterium thermosaccharolyticum	0.000371066	0.000447958	0.000429823	0.000436032	0.000508646	0.000486588	0.000470364	0.000502492	0.000480606	0.000542684	0.000511383	0.000499038	0.000473852	0.000461104	0.000506058	0.000463108	7.55461e-05	0.000194034	0.000188082	0.00024959
Paenibacillus sp. MBLB1234	0.000370709	0.00039908	0.000328004	0.000404085	0.000385875	0.000379837	0.000366992	0.000364331	0.000379184	0.000451379	0.000381404	0.000347617	0.000439739	0.00050193	0.00046962	0.000460257	3.72145e-05	0.000171539	0.000141369	0.000192031
Bifidobacterium longum	0.000369101	0.000369919	0.000297515	0.000461935	0.000385354	0.000304978	0.000379632	0.000340532	0.000400633	0.000467668	0.0004248	0.000441513	0.000391273	0.000373446	0.000375615	0.000372411	2.57639e-05	0.000288459	0.000139251	0.000167582
Desulfitobacterium dehalogenans	0.00036785	0.000394081	0.000361613	0.000377492	0.000407265	0.000367585	0.000400998	0.000363053	0.000388836	0.000449665	0.000402576	0.000386885	0.000531452	0.000632817	0.000651536	0.000592828	4.65705e-05	0.000175334	0.000193204	0.000205911
Methylomusa anaerophila	0.0003666	0.000424352	0.00039508	0.000359187	0.000581161	0.000461914	0.000613309	0.000500415	0.000473252	0.000544184	0.000581638	0.000570619	0.000454279	0.000472661	0.000486417	0.000511218	6.42351e-05	0.000232638	0.000190267	0.000240039
Fusobacterium ulcerans	0.000364634	0.000366587	0.00034729	0.000357805	0.000439783	0.000393265	0.0004338	0.000411289	0.000449659	0.000495746	0.000515806	0.000437021	0.00063435	0.000544108	0.000671041	0.000551845	3.72145e-05	0.000186166	0.000151408	0.000220938
Clostridium aceticum	0.00035588	0.000351312	0.000397349	0.000370757	0.000410221	0.000417603	0.000416948	0.000341809	0.000369072	0.000427589	0.000422062	0.000345878	0.000396306	0.00039491	0.000464744	0.000402703	7.25438e-05	0.000219307	0.000199555	0.000247679
Cohnella sp. HS21	0.000355344	0.000380195	0.000325593	0.000344509	0.000399265	0.000348114	0.000390165	0.000340052	0.000389755	0.000402298	0.000390462	0.00037254	0.000492307	0.000490223	0.00052773	0.00048948	4.74083e-05	0.000167743	0.000143349	0.000168982
Haliscomenobacter hydrossis	0.000354808	0.000348535	0.000285319	0.000220865	0.000191633	0.000254456	0.000257602	0.000288621	0.00021985	0.000148316	0.000151361	0.000230537	9.37638e-05	9.45623e-05	8.66908e-05	9.51519e-05	3.58181e-05	6.65604e-05	6.57671e-05	7.99705e-05
Clostridium sp. JN-1	0.000353379	0.000381028	0.000375085	0.00039407	0.000462911	0.000406357	0.000435004	0.000427581	0.000467737	0.000514821	0.000492423	0.000480926	0.000537977	0.000521443	0.000597218	0.000490371	4.23114e-05	0.000210975	0.000144578	0.000173567
Pelosinus fermentans	0.000350163	0.000430462	0.000363173	0.000429297	0.000500473	0.00041475	0.000453512	0.000419435	0.00043541	0.000495317	0.000570895	0.000470783	0.00057209	0.00051679	0.000598302	0.000525652	5.48093e-05	0.000280035	0.000194501	0.00024717
Dehalobacter restrictus	0.000347841	0.000438515	0.00043507	0.000447257	0.000482388	0.000583939	0.000553874	0.000713966	0.000572989	0.000534111	0.000944293	0.000700595	0.000433215	0.000533751	0.000554957	0.00043246	4.94331e-05	0.000226435	0.000180228	0.000188084
Paenibacillus sp. JDR-2	0.000346054	0.000391581	0.000325735	0.000389752	0.000420133	0.000357346	0.000394077	0.000349316	0.000388836	0.000448379	0.000391305	0.000385291	0.00055494	0.000564221	0.00053816	0.000552736	3.88902e-05	0.00014784	0.000124568	0.000182226
Fusobacterium mortiferum	0.000341231	0.000338537	0.000347715	0.000365231	0.000345705	0.000370438	0.000352397	0.000330789	0.000330158	0.000324282	0.000326105	0.000331823	0.000381952	0.000370594	0.000360173	0.000388626	9.41184e-05	0.000187184	0.00020256	0.000266144
Bifidobacterium gallinarum	0.000338551	0.000369919	0.000336371	0.000400114	0.000426915	0.000321427	0.000377826	0.000415602	0.000477542	0.000478385	0.000471251	0.000453974	0.000336468	0.000362939	0.000368571	0.00035976	3.84014e-05	0.000163855	0.00014451	0.000186428
Jeotgalibaca sp. H21T32	0.000338551	0.000429906	0.000369412	0.000519094	0.0004923	0.000434388	0.000469762	0.000454255	0.000485968	0.000606126	0.000512963	0.000536858	0.00044384	0.00047101	0.000365998	0.000429965	2.62526e-05	0.000152098	0.00012491	0.000156758
Phoenicibacter massiliensis	0.000334978	0.0003552	0.000356508	0.000337601	0.000340141	0.000327973	0.000332535	0.000295969	0.000326175	0.000281201	0.000295559	0.000310233	0.000351008	0.000377649	0.000344461	0.000358512	4.46155e-05	0.000152932	0.000144442	0.000177896
Treponema sp. OMZ 838	0.000333906	0.000299657	0.000338072	0.000331903	0.000314056	0.000331162	0.000322303	0.000332386	0.000356969	0.000352359	0.000343063	0.000346748	0.000387917	0.000393559	0.00037697	0.000394862	5.61359e-05	0.000153857	0.000156393	0.000195469
Erysipelothrix larvae	0.000327296	0.00036381	0.000383735	0.000356251	0.000403439	0.000423981	0.000401299	0.000331907	0.000329852	0.000418801	0.000380035	0.000317043	0.00045372	0.000408119	0.000504974	0.000413216	8.05732e-05	0.000233934	0.000219429	0.00025914
Clostridium novyi	0.000326224	0.000320208	0.000355089	0.000387853	0.0003977	0.000394776	0.000364284	0.000360178	0.000359727	0.000455023	0.000375295	0.000343995	0.000319132	0.000374947	0.000311951	0.000347465	8.53908e-05	0.000161541	0.000168959	0.000234818
Clostridium taeniosporum	0.00032533	0.000397691	0.00033949	0.000433269	0.000415959	0.000378159	0.000440571	0.00039388	0.00041963	0.000416229	0.00040721	0.000462523	0.00047031	0.000437388	0.000489126	0.000439409	3.17685e-05	0.000158579	0.000102987	0.000119828
Persicobacter sp. JZB09	0.000322829	0.000291603	0.000300918	0.000193754	0.000238585	0.000282318	0.00029221	0.00033015	0.000187371	0.000156247	0.000157365	0.000191849	0.00017392	0.000164508	0.000209277	0.000170169	8.00146e-05	0.000102849	0.000109407	0.000140967
Bacillus thuringiensis	0.000322472	0.000382694	0.000359202	0.000410129	0.000453695	0.000407532	0.000364434	0.000459207	0.000457319	0.000398011	0.000420166	0.000536713	0.00034467	0.000398512	0.000394579	0.000402703	0.000358251	0.00037085	0.000373841	0.000331852
Ilyobacter polytropus	0.000320149	0.000348813	0.000358635	0.000416864	0.000371616	0.000342408	0.00037918	0.000334941	0.000330618	0.00035043	0.00033411	0.000333272	0.000344857	0.000346578	0.000352046	0.00034889	7.06587e-05	0.000158671	0.000150452	0.000207439
Pelosinus sp. UFO1	0.000319613	0.00032965	0.000363031	0.00034848	0.000407265	0.000344422	0.000348635	0.000328393	0.000357735	0.000366505	0.000367816	0.000348631	0.00040078	0.000393259	0.000388619	0.000419987	4.26605e-05	0.000193016	0.000146217	0.000185155
Clostridium tyrobutyricum	0.000313718	0.000346591	0.000342185	0.000367994	0.000406047	0.00035466	0.00040461	0.000382379	0.000359727	0.000458881	0.000398468	0.000352689	0.000391273	0.000374346	0.000384691	0.000341228	6.84244e-05	0.00017876	0.000160901	0.000199035
Clostridium septicum	0.000313361	0.000411021	0.000340767	0.000426362	0.000407786	0.000560105	0.000473975	0.000460804	0.000361565	0.000518036	0.000375611	0.000368483	0.000388663	0.000438138	0.000351504	0.000390586	4.40569e-05	0.000154783	0.000110636	0.000138675
Paenibacillus sp. 18JY67-1	0.000312646	0.000347424	0.000328429	0.000378355	0.000400657	0.000377488	0.000356309	0.000348039	0.000411817	0.000457381	0.000391726	0.000375583	0.000415692	0.000452848	0.000397017	0.00044422	3.58879e-05	0.000177927	0.000140276	0.000186555
Amphibacillus xylanus	0.000311931	0.000306044	0.000325168	0.000344681	0.000373703	0.000330155	0.000322905	0.000331268	0.000336899	0.000340999	0.000342747	0.000318057	0.000239722	0.000240758	0.000244089	0.000219883	5.9208e-05	0.000140156	0.000131807	0.000175477
Escherichia coli	0.000310859	0.000337426	0.000309002	0.000302546	0.000304318	0.000314209	0.000298228	0.000347719	0.000347624	0.000350858	0.000322313	0.000324578	0.000296577	0.000281735	0.000314931	0.000270488	7.33817e-05	0.000152006	0.000143964	0.000194451
Paenibacillus sp. FSL H7-0357	0.000309073	0.000352701	0.000328288	0.000357978	0.000395614	0.000332337	0.000450502	0.000365449	0.000356969	0.000474741	0.000398573	0.000382103	0.000381393	0.000383502	0.000466234	0.000379004	5.89986e-05	0.000156357	0.000122997	0.000163252
Sneathia amnii	0.000308537	0.000116364	0.000235545	0.000150237	0.000151985	0.000160797	0.000179057	0.000131772	0.000105559	0.000121311	0.000116391	0.000101141	0.000116879	0.000124882	0.000107686	0.000112436	2.93247e-05	6.55421e-05	5.94158e-05	0.000101364
Streptococcus agalactiae	0.000302105	0.0003066	0.000282625	0.000340364	0.000301884	0.000279801	0.000272348	0.000360337	0.000382248	0.000349572	0.000361602	0.000378626	0.000427063	0.000416674	0.000448083	0.00044618	2.44373e-05	0.000120438	9.41774e-05	9.67796e-05
Prevotella fusca	0.000301391	0.000277162	0.000186195	0.000127615	0.000106077	0.000252777	0.000252787	0.000270573	0.000198401	6.38704e-05	8.34222e-05	0.000209527	4.95848e-05	4.69809e-05	4.68672e-05	5.27433e-05	2.92549e-05	3.37894e-05	3.78349e-05	3.29815e-05
Lactobacillus salivarius	0.000300676	0.000297991	0.000315525	0.000337947	0.000269365	0.000295746	0.000312222	0.000284149	0.000292929	0.00031185	0.000310411	0.000276036	0.000440112	0.000452698	0.000321569	0.000445467	3.47708e-05	0.000129603	0.000123544	0.000160705
Pedobacter sp. PACM 27299	0.000300676	0.000219674	0.00010508	9.04875e-05	7.46014e-05	0.000110108	0.000107133	0.000109571	9.78984e-05	7.65159e-05	6.63586e-05	0.000115051	6.71073e-05	6.79948e-05	7.85636e-05	7.30567e-05	2.42278e-05	3.05493e-05	2.61566e-05	2.6105e-05
Paenibacillus sp. BIHB4019	0.000296746	0.000312154	0.000292268	0.000380255	0.000367269	0.000330826	0.000392873	0.000315455	0.000340729	0.000378078	0.000351701	0.000348197	0.000382512	0.000373446	0.000346086	0.000364571	3.96582e-05	0.00016617	0.00014089	0.000159686
Enterococcus gilvus	0.000296567	0.000272718	0.000330557	0.000279233	0.000349879	0.000336533	0.000312222	0.000310983	0.000354058	0.000402298	0.000341378	0.000377756	0.000409354	0.000354834	0.000366811	0.000378113	8.1062e-05	0.00016006	0.000178725	0.000241185
Gardnerella vaginalis	0.000296031	0.000291881	0.00031439	0.000303582	0.00033475	0.000322434	0.000286341	0.000293413	0.000243903	0.000384937	0.000280286	0.000274152	0.000336655	0.000344327	0.000302741	0.000305769	5.70436e-05	0.000140156	0.00012211	0.000136256
Thermacetogenium phaeum	0.00029478	0.000218563	0.000310703	0.000208605	0.000265365	0.000257309	0.000234129	0.000199975	0.000195184	0.000226333	0.000182644	0.000168375	0.000239536	0.000224998	0.000241515	0.000236098	4.41268e-05	0.000111366	0.000100187	0.000125814
Coriobacteriaceae bacterium 68-1-3	0.000294066	0.00028827	0.000304747	0.000289594	0.00026693	0.000275772	0.00026031	0.000238468	0.000212649	0.000242193	0.000225619	0.000195471	0.000338333	0.000408269	0.000370197	0.000386309	4.53835e-05	0.000135528	0.000120607	0.000150518
Sphingobacterium sp. 21	0.000291029	0.000279384	0.000253696	0.000179766	0.000154594	0.000274933	0.000267984	0.000330948	0.000183081	0.000110809	9.64833e-05	0.000198949	6.67345e-05	8.06031e-05	6.79981e-05	7.37694e-05	6.05346e-05	6.78565e-05	6.88403e-05	6.37981e-05
Peptoniphilus sp. ING2-D1G	0.000290314	0.000350757	0.000364165	0.000355388	0.00039144	0.000361542	0.000355406	0.000308587	0.000342108	0.000367791	0.000355914	0.000348486	0.000408422	0.000397612	0.000375073	0.000405554	4.61516e-05	0.000183759	0.000165408	0.000191649
Desulfosporosinus acidiphilus	0.000287992	0.000356311	0.00035353	0.000365576	0.000379615	0.000328812	0.000426277	0.00035858	0.000324183	0.000361146	0.000435755	0.000426878	0.000447009	0.000472961	0.000465963	0.000420878	4.30794e-05	0.000234859	0.00017053	0.000186683
Brevibacillus laterosporus	0.000287456	0.000292992	0.000342468	0.000333111	0.000323447	0.000350632	0.000331181	0.00034756	0.000325868	0.000304134	0.000351174	0.000332258	0.000361447	0.000415323	0.000384691	0.000383815	0.000113738	0.00018524	0.000224414	0.000292758
Fusobacterium varium	0.00028692	0.000308544	0.000275393	0.000322578	0.000336315	0.000292557	0.000321852	0.00027217	0.000305186	0.000348287	0.000366552	0.000301684	0.000443281	0.000428982	0.000416116	0.000419987	3.05117e-05	0.00020755	0.000159944	0.00018108
Clostridium drakei	0.000281381	0.000310488	0.000332684	0.000300646	0.000451086	0.000594513	0.000539881	0.000650396	0.000198401	0.00021583	0.000207924	0.000205324	0.000230029	0.000205035	0.000225667	0.00020937	2.97437e-05	0.000263002	0.000180569	0.0001686
Flammeovirgaceae bacterium 311	0.000280131	0.000255222	0.000220371	0.000221384	0.000161202	0.000205612	0.000198468	0.000246135	0.000199627	0.000165892	0.000162421	0.000206484	0.000140925	0.000126233	0.000132068	0.000138095	3.01626e-05	5.60071e-05	5.10839e-05	5.15734e-05
Capnocytophaga canimorsus	0.000279059	0.000218841	0.000100684	8.54796e-05	0.000113032	0.000155426	0.00015107	0.000167231	5.63797e-05	4.24374e-05	4.45551e-05	6.81034e-05	4.77207e-05	5.32851e-05	3.874e-05	3.34992e-05	2.31107e-05	6.82268e-05	5.28595e-05	5.11913e-05
Filimonas lacunae	0.000279059	0.000231338	0.000217393	0.000168887	0.000117206	0.000162811	0.000153177	0.000175856	0.00011996	9.98779e-05	0.000102171	0.000131135	8.6121e-05	8.85583e-05	0.00011473	8.71334e-05	9.15351e-05	8.21128e-05	8.70065e-05	8.92665e-05
Bacillus coagulans	0.000277808	0.00022995	0.000279505	0.000316188	0.000337011	0.000324616	0.000318542	0.000297726	0.0003274	0.000284845	0.000303986	0.000306755	0.000283342	0.000296145	0.000305992	0.000272448	4.18227e-05	0.000129788	0.000102578	0.000137784
Syntrophomonas wolfei	0.000276379	0.00030049	0.00028617	0.000322405	0.000399265	0.000335022	0.000310567	0.000261788	0.000295074	0.000331997	0.000344854	0.000275456	0.000458007	0.00042478	0.000483572	0.000408761	5.844e-05	0.000184407	0.000144715	0.000213425
Pseudopedobacter saltans	0.000275664	0.000234393	0.000215975	0.000149546	0.000133378	0.0001707	0.000185528	0.000212273	0.000112913	8.12311e-05	7.74184e-05	0.000108531	6.58024e-05	7.92522e-05	5.91936e-05	7.92932e-05	3.49104e-05	6.63753e-05	5.54547e-05	5.57756e-05
Paenibacillus durus	0.000275128	0.000293269	0.000297799	0.000332248	0.000323621	0.000255966	0.000290855	0.00029501	0.000324796	0.000351287	0.000347277	0.00034269	0.000311862	0.000293743	0.000337688	0.000341406	2.35994e-05	0.000137379	0.000102578	0.000131544
Clostridium sp. AWRP	0.000273699	0.000325485	0.000256249	0.000376456	0.000340662	0.000307999	0.000339908	0.000304434	0.000334142	0.000488458	0.00033548	0.000306465	0.0003333	0.000392208	0.000268064	0.000324479	4.54533e-05	0.00015682	0.0001385	0.000185027
Flammeovirga sp. MY04	0.000271555	0.000240503	0.000191017	0.000159217	0.000159115	0.000193192	0.000196211	0.000227447	0.000145699	0.0001361	0.000112283	0.000145625	8.6121e-05	9.71139e-05	9.6579e-05	9.60428e-05	8.98594e-05	0.000102294	9.47237e-05	9.43601e-05
Clostridium tetani	0.000271019	0.000276606	0.000289999	0.000278888	0.000374572	0.000337372	0.000323958	0.00031849	0.000331077	0.000370577	0.000331793	0.000305306	0.000298068	0.00028879	0.000267658	0.000277794	4.53137e-05	0.000124789	0.000115417	0.000147716
Cyclobacterium marinum	0.000270841	0.000160521	7.96966e-05	6.11309e-05	6.67761e-05	8.4427e-05	8.30586e-05	0.000110369	5.91374e-05	3.94367e-05	5.94067e-05	5.63664e-05	5.79732e-05	5.04332e-05	5.97354e-05	5.39907e-05	5.27845e-05	4.72126e-05	5.36791e-05	5.23374e-05
Candidatus Methanomassiliicoccus intestinalis	0.000270126	0.000324096	0.000381324	0.000335529	0.000343966	0.000334015	0.000362779	0.000310823	0.000316983	0.000367148	0.000330213	0.000307045	0.000411032	0.000412021	0.000441175	0.000445467	5.36224e-05	0.000148396	0.000160559	0.000196488
Niastella koreensis	0.00026959	0.000256055	0.000172156	0.000154209	0.00014329	0.000205445	0.000182067	0.000204607	0.000142634	0.000100735	9.95379e-05	0.000140699	8.66802e-05	9.75642e-05	8.30336e-05	8.14315e-05	2.85567e-05	5.95249e-05	4.71911e-05	6.04873e-05
Bacillus circulans	0.000266732	0.000260776	0.000253696	0.000281306	0.00030171	0.000272919	0.000287696	0.000264663	0.000262901	0.000338213	0.000291451	0.000266473	0.000260227	0.000265225	0.000335114	0.000241978	5.48792e-05	0.000113958	0.000110909	0.000153065
Paenibacillus yonginensis	0.000263516	0.000314376	0.000272698	0.000290976	0.000295971	0.000265534	0.000241201	0.000264982	0.0002963	0.000254624	0.000283867	0.000286469	0.000299373	0.000274831	0.00033972	0.000312184	4.64308e-05	0.000108589	0.000103397	0.000159432
Apibacter sp. HY041	0.000262265	0.000225506	0.000149892	0.000112419	0.000105033	0.000171707	0.000179358	0.000192627	0.000123331	5.03676e-05	5.91961e-05	0.000141133	6.63617e-05	7.51995e-05	6.10899e-05	7.18094e-05	1.52209e-05	5.2119e-05	3.48299e-05	3.76931e-05
Tetragenococcus halophilus	0.00025762	0.000316875	0.000264757	0.000332075	0.000336489	0.000238175	0.000325614	0.00023719	0.000263973	0.000303277	0.000238048	0.00024039	0.000370768	0.000355584	0.000359225	0.000346396	3.34442e-05	0.000119513	0.000117739	0.000118682
Enterococcus wangshanyuanii	0.000257442	0.000322152	0.000307725	0.000339155	0.00026154	0.000284333	0.00025369	0.000238628	0.000268723	0.000292775	0.000272913	0.000241984	0.000295645	0.000274981	0.000287028	0.000298285	3.70748e-05	0.000103682	0.000112617	0.000141604
Parvimonas micra	0.000257442	0.000283549	0.000301344	0.000328794	0.000430741	0.000373123	0.000411531	0.000311302	0.000321732	0.000362647	0.000326105	0.000314869	0.000304779	0.000325414	0.000310461	0.000290979	6.53523e-05	0.000167003	0.000159057	0.000221192
Paenibacillus larvae	0.000257263	0.000238837	0.000246038	0.000240206	0.000309709	0.000268387	0.000274304	0.000227766	0.000278681	0.000318495	0.000270174	0.000250244	0.000242332	0.000248414	0.00019668	0.000259084	5.02012e-05	0.000115162	0.00011651	0.000151664
Moorella thermoacetica	0.000255476	0.000234671	0.000286596	0.000275952	0.000331794	0.000278961	0.000267382	0.000247093	0.000257079	0.000266412	0.000231202	0.000232276	0.000285392	0.000330668	0.000285944	0.000312184	4.19623e-05	0.000134695	0.000120402	0.000137784
Peptoniphilus ivorii	0.000255119	0.00024939	0.000268586	0.000236407	0.000310057	0.000294739	0.000288899	0.000235274	0.000228583	0.000230834	0.00022741	0.000207063	0.00025594	0.000245562	0.000264407	0.000266033	5.07597e-05	0.00013525	0.000122451	0.000153447
Chitinophaga pinensis	0.000254404	0.000215231	0.000192576	0.000160425	0.000168158	0.000211991	0.000229916	0.000228565	0.000186758	0.000109094	0.000130295	0.000203586	9.13405e-05	0.000120679	9.18381e-05	9.88938e-05	5.9208e-05	9.84058e-05	8.07918e-05	8.53189e-05
Pseudoflavitalea sp. 5GH32-13	0.000252261	0.000223285	0.000242777	0.000176485	0.000112511	0.000133606	0.000154832	0.000166752	0.000124709	0.000109094	9.31127e-05	0.000116066	5.46179e-05	6.45425e-05	5.60781e-05	5.4347e-05	7.10078e-05	6.69307e-05	6.46744e-05	7.55136e-05
Solitalea canadensis	0.000252261	0.000213009	0.000163931	0.00013245	0.000137378	0.000191513	0.000197415	0.000246933	0.000177719	0.000114238	0.000109123	0.000180112	3.42993e-05	4.62304e-05	3.278e-05	3.51028e-05	2.82774e-05	6.0358e-05	4.56204e-05	4.78804e-05
Peptostreptococcaceae bacterium oral taxon 929	0.000250295	0.000291325	0.000334385	0.000273535	0.000364834	0.000334183	0.000351795	0.000292614	0.000274238	0.000283987	0.000283867	0.000245752	0.000349704	0.000368342	0.000335791	0.000336952	7.23344e-05	0.000174131	0.000143008	0.000197634
Sporolactobacillus terrae	0.000249402	0.000270497	0.000228029	0.000242969	0.000313361	0.000252106	0.000298379	0.000274086	0.00021648	0.000355145	0.000268278	0.000239086	0.000261532	0.00022725	0.000252758	0.000225407	7.33817e-05	0.000182926	0.000166774	0.000266908
Clostridium chauvoei	0.000248687	0.000281328	0.000232708	0.000294948	0.00029371	0.000442612	0.000336447	0.000299962	0.00027148	0.000269199	0.000259957	0.000265603	0.000222759	0.000231302	0.000245308	0.000214715	2.24823e-05	9.3592e-05	5.92792e-05	8.2008e-05
Paenibacillus chitinolyticus	0.000248687	0.000257999	0.000317368	0.000290113	0.000291972	0.000294068	0.000287846	0.000274885	0.000301815	0.00033264	0.000286501	0.000269081	0.000326402	0.000330968	0.000298948	0.00032822	8.25282e-05	0.000119883	0.000150656	0.000221192
Bacillus cereus	0.000245829	0.000267442	0.000258943	0.00031308	0.000285016	0.000281311	0.000316134	0.000266739	0.000268263	0.000323853	0.000293663	0.000277775	0.000263023	0.000290591	0.000265491	0.000275833	3.03721e-05	0.000110348	9.69774e-05	0.000122248
Finegoldia magna	0.000245293	0.000291881	0.000313114	0.000286141	0.000398918	0.000346939	0.000385801	0.000317052	0.000336746	0.000336713	0.000322313	0.000311247	0.000243823	0.000283236	0.000250591	0.000250353	7.25438e-05	0.000171724	0.000133993	0.00015854
Paenibacillus sp. 32O-W	0.000243864	0.000331039	0.000265324	0.000332766	0.000346749	0.000345093	0.000342917	0.000338615	0.000362485	0.00037272	0.000364024	0.000355297	0.000386613	0.000393409	0.000341345	0.000407514	4.62912e-05	0.000153672	0.000134744	0.000200563
Thermosediminibacter oceani	0.00024172	0.000257999	0.000294679	0.000275434	0.000289189	0.000276779	0.000283482	0.000225211	0.000224446	0.000249052	0.000224777	0.000244303	0.000354737	0.000325865	0.00036058	0.000328933	6.28387e-05	0.000128214	0.000118627	0.00018057
Cohnella sp. 18JY8-7	0.000241363	0.000290492	0.000234836	0.000293048	0.000343271	0.000289536	0.000293714	0.000290378	0.000304266	0.000313136	0.000300194	0.00029922	0.000421844	0.000482568	0.000394172	0.000445111	3.58181e-05	0.000155894	0.000117056	0.000148353
Owenweeksia hongkongensis	0.000240827	0.000213009	0.000193995	0.000163534	0.000151116	0.000183624	0.000179509	0.000215148	0.000165462	0.000114024	0.000124501	0.000168809	0.00012042	0.000119479	9.60372e-05	0.000104239	4.93633e-05	7.77619e-05	7.00696e-05	6.40528e-05
Clostridium sp. JN500901	0.000240648	0.000222174	0.000271848	0.000235889	0.000297536	0.000335022	0.000296423	0.000265621	0.000203764	0.000240693	0.00021635	0.00020402	0.000273649	0.000277233	0.000281339	0.000253916	5.75323e-05	0.000149321	0.00014731	0.000176113
Chlorobium phaeobacteroides	0.000239755	0.00036131	0.000289999	0.000436896	0.000128161	0.000257309	0.000225402	0.000153016	0.000113372	0.000151317	0.00015747	0.000133599	0.000147263	0.000134489	0.000185708	0.000133997	2.60432e-05	6.74862e-05	4.5757e-05	3.92212e-05
Atopobium parvulum	0.000239576	0.000281328	0.000310136	0.000304273	0.000297362	0.000285507	0.000263169	0.000258434	0.000282818	0.00030392	0.000275336	0.000271399	0.000341502	0.000336972	0.000294884	0.00032929	4.88047e-05	0.00014821	0.000149222	0.000158286
Thermincola potens	0.000239576	0.000264942	0.000265324	0.000278888	0.000340141	0.000305481	0.000277464	0.000250447	0.000267037	0.000262983	0.000268068	0.000262995	0.000251093	0.000237757	0.000261562	0.000252669	5.11787e-05	0.000152191	0.000129895	0.000160578
Paenibacillus sp. FW100M-2	0.000239397	0.000251056	0.000248166	0.000269908	0.000269191	0.000228607	0.000219985	0.000276323	0.000309322	0.000329211	0.00029103	0.00032168	0.000239909	0.000238957	0.000273482	0.000233425	1.79439e-05	9.60914e-05	7.38258e-05	9.32141e-05
Lactobacillus ruminis	0.000239219	0.000303545	0.000256107	0.000275089	0.000328142	0.000297257	0.000283031	0.000294691	0.000339351	0.000311636	0.000305987	0.000359354	0.000331622	0.000291942	0.000287299	0.000288307	3.90298e-05	0.00011618	9.87531e-05	0.000129888
Runella sp. SP2	0.000236539	0.000225506	0.000150176	0.000111037	0.000104685	0.000143005	0.000157089	0.000155411	0.0001362	6.17271e-05	7.8893e-05	0.00014577	8.42569e-05	7.64003e-05	9.42763e-05	8.49952e-05	1.86422e-05	2.8883e-05	3.16201e-05	3.64197e-05
Paenibacillus naphthalenovorans	0.000235467	0.00019218	0.000192009	0.000193236	0.000224674	0.000181778	0.000199972	0.000157488	0.00017251	0.00017125	0.000181696	0.000169534	0.000246619	0.000275431	0.000261562	0.000240196	2.52751e-05	9.93315e-05	9.7114e-05	9.04125e-05
Anoxybacter fermentans	0.000232966	0.000223007	0.000248449	0.000260411	0.000319621	0.000287186	0.000263169	0.000269454	0.000267344	0.000238549	0.000250583	0.000269805	0.000303847	0.000290591	0.00030098	0.000282248	3.92393e-05	0.000152098	0.000137954	0.000172293
Symbiobacterium thermophilum	0.00023243	0.000224673	0.000243202	0.000200316	0.000251628	0.000256302	0.000266179	0.000229523	0.000222914	0.00026234	0.000213506	0.000221119	0.000217912	0.000236406	0.000222552	0.000218635	3.76334e-05	0.000101461	9.28115e-05	0.000126323
Bacillus foraminis	0.000232251	0.000238004	0.000231148	0.000254021	0.000276843	0.000266541	0.000260912	0.000247572	0.000247274	0.000294918	0.00028313	0.000276326	0.000318573	0.000311005	0.000339991	0.000311649	4.67799e-05	0.000123493	0.000111729	0.000166563
Candidatus Izimaplasma sp. HR1	0.000231537	0.000221618	0.000524126	0.000263692	0.000302579	0.000551713	0.00044012	0.000343566	0.000220157	0.000203828	0.000194441	0.000222423	0.000196662	0.000214491	0.000195732	0.000186027	0.000472198	0.000352428	0.000629534	0.000975182
Scardovia inopinata	0.000229571	0.000279661	0.000233985	0.00029702	0.00025841	0.000251267	0.000241652	0.0002661	0.000284043	0.000290846	0.000314519	0.000250968	0.00027048	0.000372545	0.000245714	0.000338021	2.49958e-05	0.000124604	0.000110841	0.000114735
Paenibacillus stellifer	0.000228321	0.000250223	0.000238806	0.000265764	0.000265018	0.00023616	0.00023458	0.000235433	0.000288027	0.000257839	0.000258693	0.000265458	0.000341874	0.000357986	0.000376021	0.000325369	2.15746e-05	9.29439e-05	8.75529e-05	0.00011881
Chryseolinea sp. KIS68-18	0.000227785	0.000216619	0.000179105	0.000131759	0.000138073	0.000169861	0.00017018	0.00017953	0.000122718	7.0086e-05	7.57331e-05	0.000117225	4.49246e-05	4.26281e-05	4.51063e-05	4.61504e-05	7.78502e-05	7.36886e-05	6.74744e-05	7.36034e-05
Sphingobacterium sp. G1-14	0.00022707	0.000151078	7.89876e-05	6.90744e-05	4.41696e-05	5.65644e-05	5.43191e-05	7.37925e-05	5.34688e-05	4.24374e-05	4.11845e-05	6.52054e-05	3.33672e-05	2.82186e-05	3.69791e-05	2.99354e-05	5.58566e-06	1.40712e-05	6.8294e-06	9.55062e-06
Brevibacillus brevis	0.000223497	0.000250501	0.000218669	0.000244178	0.000313709	0.000280808	0.000283633	0.000243739	0.000280366	0.000306921	0.000280707	0.000249229	0.000296763	0.000295545	0.000333489	0.000311114	2.27616e-05	0.000112199	9.72506e-05	0.000107731
Desulfovibrio fairfieldensis	0.000223497	0.000204955	0.000185911	0.000207914	0.000226239	0.000217026	0.00021833	0.000198377	0.00022843	0.000234477	0.000219615	0.000217061	0.000266192	0.000274531	0.000253706	0.00025356	3.65861e-05	0.00011257	0.000102236	0.000100473
Bacillus clausii	0.000222247	0.000225784	0.000213706	0.000195999	0.000260496	0.000226593	0.000229314	0.000245336	0.000236396	0.000320424	0.000268384	0.00023358	0.000252025	0.000210739	0.000274566	0.000239662	2.99531e-05	0.000117383	9.34944e-05	0.000114735
Peptoniphilus harei	0.000222068	0.00024578	0.000283476	0.000269218	0.000351618	0.000333847	0.000336748	0.000282712	0.000285575	0.000318066	0.000292926	0.000270675	0.000386053	0.000369243	0.00038293	0.000379004	6.42351e-05	0.000174316	0.000156393	0.000210241
Treponema pedis	0.000220103	0.00024328	0.000208601	0.000235716	0.000279973	0.000267044	0.000247671	0.000305872	0.000290478	0.000279058	0.000279443	0.000320666	0.000215675	0.000276332	0.00022797	0.000204559	3.16288e-05	0.00010322	7.56697e-05	9.04125e-05
Anaerococcus mediterraneensis	0.000219567	0.000218563	0.000301202	0.000247459	0.00030797	0.000240357	0.000278667	0.000221218	0.000228889	0.000307135	0.000275862	0.000194312	0.000301424	0.000281285	0.000251674	0.000295256	3.77731e-05	9.20182e-05	0.0001105	0.000146061
Legionella pneumophila	0.000218852	0.000186071	0.000191726	0.000148855	0.000134596	0.000196045	0.000175446	0.000176335	0.000110155	8.59464e-05	9.13221e-05	0.000135627	9.0222e-05	9.69638e-05	9.29217e-05	0.000102992	0.000183908	0.000126826	0.000162403	0.000186555
Paenibacillus polymyxa	0.00021778	0.000271607	0.00023909	0.000265591	0.000296145	0.00027359	0.000275207	0.000227128	0.000246968	0.00024948	0.000323156	0.000273283	0.000255381	0.000276032	0.000313306	0.00026835	3.16288e-05	0.00013775	9.8275e-05	0.000106712
Streptococcus anginosus	0.000216708	0.000214953	0.000182933	0.000224665	0.000251802	0.000162308	0.000197565	0.000256197	0.000266884	0.000350001	0.000283551	0.000288353	0.00023152	0.000204735	0.000284861	0.000213468	9.49563e-06	8.9241e-05	7.28014e-05	8.22627e-05
Bifidobacterium breve	0.000216351	0.000258277	0.000210019	0.00025264	0.000295971	0.00026352	0.000275959	0.000236551	0.000268416	0.000302634	0.000278706	0.000268646	0.00028968	0.000311605	0.000363424	0.000300067	3.79825e-05	0.000132288	0.000112139	0.00014084
Enterococcus cecorum	0.000216172	0.000175517	0.00020463	0.000218448	0.000211805	0.00024086	0.000226304	0.000180648	0.000184919	0.0002079	0.000208556	0.00017562	0.000284274	0.000230852	0.00027416	0.000230574	5.71134e-05	0.000132103	0.000128119	0.00015905
Halanaerobium praevalens	0.000215994	0.000178572	0.000211295	0.000206878	0.000227804	0.000191513	0.000232173	0.000205884	0.000234558	0.000212187	0.000202025	0.000237203	0.000264701	0.000220645	0.000260479	0.000250709	2.09462e-05	9.34068e-05	7.16404e-05	9.2832e-05
Flammeovirga sp. L12M1	0.000215815	0.000173573	0.000156132	0.000115354	9.42517e-05	0.000141831	0.000134669	0.000171703	0.000123024	9.43053e-05	8.94261e-05	0.000120992	4.828e-05	3.21211e-05	5.14727e-05	4.0983e-05	1.76647e-05	4.23062e-05	2.98445e-05	3.23448e-05
Rhodopseudomonas palustris	0.000215815	0.000238004	0.00019442	0.000208777	0.000229369	0.000216187	0.000188838	0.000198537	0.000217858	0.0002079	0.00021477	0.000197065	0.000232266	0.000242109	0.000242463	0.000260866	9.10463e-05	9.44251e-05	0.00011248	0.000126832
Desulfovibrio piger	0.0002151	0.000166075	0.000182224	0.000205151	0.000222065	0.000211991	0.0002087	0.000213391	0.00023609	0.000170607	0.000227937	0.000222133	0.000183613	0.000169612	0.00019072	0.000184245	1.77345e-05	0.000105534	8.10649e-05	8.7229e-05
Paenibacillus bovis	0.000214743	0.000225229	0.000212004	0.000240552	0.000256671	0.000236832	0.000227057	0.000199016	0.000237316	0.000240693	0.000214665	0.00022619	0.000255753	0.000289991	0.000245985	0.0002516	2.85567e-05	0.000115162	9.87531e-05	0.000114607
Anaerococcus prevotii	0.000214386	0.000237171	0.000271706	0.000244178	0.000310057	0.000313706	0.000309814	0.000261149	0.000257539	0.000281844	0.000277021	0.000231986	0.000257431	0.000220795	0.000235555	0.00021721	5.80909e-05	0.000139786	0.000139047	0.000207567
Syntrophothermus lipocalidus	0.000212599	0.000224673	0.000236821	0.000200488	0.000254236	0.000228272	0.000223596	0.000234155	0.000226898	0.000249266	0.000225619	0.000212135	0.000308694	0.000300048	0.000314796	0.000330893	3.26761e-05	0.000103682	7.85381e-05	0.000118173
Sphingobacterium mizutaii	0.000212242	0.000163575	0.000115149	9.80857e-05	6.81673e-05	0.000100205	0.000111347	9.82303e-05	7.39983e-05	8.38031e-05	5.68788e-05	7.91158e-05	5.18217e-05	5.20843e-05	5.56718e-05	4.68632e-05	7.49177e-05	6.07283e-05	6.57671e-05	7.39855e-05
Lactobacillus plantarum	0.000211527	0.000212176	0.000159251	0.000199625	0.000166419	0.000200577	0.000178907	0.000135127	0.000122565	0.000124311	0.000151045	0.000139539	0.000161057	0.000262073	0.000217133	0.000199748	1.71061e-05	0.000105627	8.1543e-05	8.7229e-05
Pelolinea submarina	0.000206346	0.000266053	0.00028929	0.000274398	0.000360139	0.000313034	0.000251884	0.00027185	0.000347624	0.000257839	0.000268384	0.000323274	0.00028968	0.000245562	0.000398913	0.000237701	4.76178e-05	0.000148025	0.000125593	0.000160323
Halobacteroides halobius	0.000205453	0.000206066	0.000216259	0.000193754	0.000218935	0.000215515	0.000209151	0.000180169	0.000197176	0.000204685	0.000198549	0.000180836	0.000235248	0.000231903	0.000236774	0.000214181	3.44217e-05	6.94302e-05	7.28697e-05	0.000105184
Carboxydocella thermautotrophica	0.000204381	0.000237171	0.000270571	0.000249531	0.000287624	0.000284165	0.000241201	0.000228405	0.000229962	0.000261054	0.000225935	0.000215757	0.000276072	0.000281135	0.000287434	0.000289019	4.86651e-05	0.000150062	0.000123271	0.000170383
Lactobacillus fermentum	0.000204202	0.000163575	0.000192151	0.000171132	0.00016381	0.000158615	0.000150619	0.000142314	0.000181702	0.000191611	0.000150202	0.000157797	0.000179139	0.000174415	0.000145343	0.00017498	2.01782e-05	7.48921e-05	6.02353e-05	8.37908e-05
Treponema caldarium	0.000203845	0.00022023	0.000235686	0.00021085	0.000274234	0.000248917	0.000221339	0.00025476	0.000266731	0.000275843	0.000269016	0.000282702	0.000295458	0.000255468	0.000271586	0.000254451	3.14194e-05	0.00016654	0.000117124	0.000134218
Desulfotomaculum ferrireducens	0.000203309	0.000179405	0.000176127	0.000203079	0.000195111	0.000180939	0.000178305	0.000154453	0.000160713	0.000209615	0.00018296	0.000163158	0.000300678	0.000291042	0.000294207	0.000283496	2.70207e-05	9.86835e-05	7.806e-05	0.000117409
Limnochorda pilosa	0.00020313	0.00023356	0.000221364	0.000256093	0.000269017	0.000231293	0.000214869	0.000231121	0.000242371	0.000251624	0.00022583	0.000220974	0.000235248	0.00027303	0.000219842	0.000250709	2.98135e-05	0.000124141	9.95043e-05	0.000114607
Acholeplasma brassicae	0.000202416	0.000188015	0.000721665	0.000250395	0.000270582	0.000773774	0.000508282	0.000378865	0.000169445	0.000189682	0.000178642	0.000158811	0.0001687	0.000189425	0.000185843	0.000150212	0.00079093	0.00059747	0.00108792	0.00166894
Paenibacillus crassostreae	0.000200451	0.000208843	0.000158117	0.000196171	0.000223804	0.000214676	0.000238793	0.000194224	0.000189209	0.000218402	0.000219721	0.000209382	0.00020244	0.000208938	0.000216727	0.000194402	2.12255e-05	8.39643e-05	7.88795e-05	9.90718e-05
Oceanobacillus iheyensis	0.000199557	0.000212454	0.000217818	0.000187364	0.000186938	0.00020578	0.000188386	0.000185759	0.000159027	0.000181752	0.00016379	0.000154754	0.000257617	0.00025892	0.000237045	0.000264964	5.48093e-05	0.000113403	0.000110705	0.000154593
Ezakiella massiliensis	0.000199379	0.000215231	0.000242919	0.000244696	0.000311622	0.000289536	0.000274906	0.00022601	0.000227204	0.000194397	0.000185488	0.000229668	0.000273462	0.000275281	0.000248423	0.000252669	6.07441e-05	0.00015034	0.000130441	0.000165544
Paenibacillus sp. CAA11	0.000198843	0.000238281	0.000200234	0.000224665	0.000232325	0.000236496	0.000235934	0.000217065	0.000228276	0.000289774	0.000225198	0.000211555	0.000237858	0.00027318	0.000266168	0.000238592	3.40027e-05	0.000105256	9.54067e-05	0.000114607
Sphingobacterium sp. ML3W	0.000197414	0.000165242	0.000150034	9.96398e-05	9.373e-05	0.00015744	0.000157841	0.000183203	9.51407e-05	4.6724e-05	5.32975e-05	0.000107951	3.15031e-05	3.63239e-05	3.44054e-05	3.10045e-05	3.74938e-05	4.86937e-05	4.91717e-05	4.96632e-05
Runella sp. HYN0085	0.000197056	0.000148023	0.000131882	0.000110346	0.000102251	0.000156601	0.000138581	0.000152536	0.000105712	6.98716e-05	7.13092e-05	0.000114906	0.000116133	0.00012173	0.000127056	0.000117782	2.79981e-05	6.13763e-05	5.77084e-05	6.44349e-05
Carboxydothermus hydrogenoformans	0.00019652	0.000235504	0.000262914	0.000237616	0.00029771	0.000294235	0.00028258	0.000239746	0.000233332	0.000245622	0.00022583	0.000210251	0.000249975	0.000241509	0.000230408	0.000231465	5.5717e-05	0.000123401	0.00012211	0.000167582
Bifidobacterium scardovii	0.000195984	0.000232449	0.000220087	0.000235716	0.000296841	0.000254624	0.000247521	0.000222975	0.00028052	0.000296419	0.00027502	0.000273863	0.000307948	0.000314607	0.000342293	0.000314856	2.33201e-05	0.000153487	0.000118558	0.00012836
Alicyclobacillus acidocaldarius	0.00019527	0.000223285	0.000266317	0.000200488	0.000278755	0.000262848	0.000268285	0.000240704	0.00022797	0.000247551	0.000218141	0.00020489	0.000251652	0.000293593	0.000247882	0.000269775	5.844e-05	0.000111922	0.000133105	0.000173312
Dyadobacter fermentans	0.000193662	0.000181905	0.000151736	0.000118635	0.000142769	0.000181275	0.000182669	0.00019662	0.000150754	8.50891e-05	9.17434e-05	0.000140119	6.09558e-05	6.55932e-05	8.34399e-05	5.95145e-05	6.56316e-05	7.8595e-05	6.7133e-05	7.48769e-05
Fusobacterium periodonticum	0.000193126	0.00022634	0.0002571	0.000273707	0.0002205	0.0002323	0.000226455	0.000218662	0.000233945	0.000293847	0.000244474	0.000233001	0.000257245	0.000267326	0.000244902	0.000243403	2.07368e-05	9.70172e-05	7.96991e-05	0.000105566
[Bacillus] selenitireducens	0.000192769	0.000269108	0.000220229	0.000313943	0.000228499	0.000180939	0.000235032	0.000259392	0.000242218	0.000366505	0.000245316	0.000289367	0.00034523	0.000366691	0.000354078	0.000325191	2.98833e-05	0.000102572	6.85671e-05	8.60829e-05
Acholeplasma axanthum	0.000190982	0.000203289	0.000368845	0.000249531	0.000314578	0.000482224	0.000391368	0.000340691	0.000220157	0.000249909	0.000250161	0.000234015	0.000215489	0.00021209	0.000196273	0.000184245	0.000338282	0.000302623	0.000483112	0.000707128
Melioribacter roseus	0.000190982	0.000182738	0.00018733	0.00013694	0.000148681	0.000161972	0.000166569	0.00016771	0.000120879	0.000120454	0.000106174	0.000125484	0.000126199	0.000103118	0.000118387	0.000117425	2.86964e-05	7.06337e-05	5.26546e-05	7.10566e-05
Psychroflexus torquis	0.000190267	0.000138581	7.20389e-05	7.0974e-05	5.82552e-05	7.11671e-05	8.5767e-05	7.25147e-05	4.79534e-05	4.05084e-05	3.81299e-05	5.37582e-05	3.46721e-05	3.30217e-05	2.42463e-05	2.72626e-05	5.0271e-06	2.23102e-05	1.91906e-05	1.75731e-05
Marinilactibacillus sp. 15R	0.000190089	0.000238559	0.000245188	0.000274053	0.000207806	0.00022995	0.000222392	0.000173939	0.000159334	0.000202328	0.000171058	0.000161275	0.000281291	0.00028879	0.00024883	0.000311827	3.44217e-05	7.72064e-05	7.10257e-05	9.94538e-05
Paenibacillus sp. FSL R7-0331	0.000190089	0.000185237	0.000167618	0.000171995	0.000200328	0.000188156	0.000188386	0.000163557	0.000176033	0.000214759	0.000187279	0.000165042	0.000195543	0.00018177	0.000181915	0.000194402	1.56399e-05	6.23946e-05	5.77084e-05	7.38581e-05
Clostridium scatologenes	0.000189374	0.000173573	0.000188889	0.000223801	0.000203111	0.000164993	0.000226154	0.000172821	0.000194571	0.000209186	0.000221617	0.000204455	0.000343552	0.000300648	0.000373041	0.00034693	1.82232e-05	6.7301e-05	6.50159e-05	6.99105e-05
Capnocytophaga gingivalis	0.000189195	0.00017524	0.000128621	0.00010223	9.39039e-05	0.000154923	0.000142945	0.000186079	9.66728e-05	6.57994e-05	5.36135e-05	0.000101865	2.53516e-05	3.73746e-05	5.45881e-05	2.97572e-05	1.31263e-05	4.56388e-05	3.20982e-05	3.34908e-05
Gemella morbillorum	0.000189195	0.000248279	0.000210586	0.0002668	0.000206241	0.000211991	0.000237138	0.000246774	0.000219084	0.000357074	0.000220037	0.000229813	0.000229656	0.000255618	0.000238129	0.000217923	2.81378e-05	8.07242e-05	7.0616e-05	9.7671e-05
Halothermothrix orenii	0.000189017	0.000191903	0.000190308	0.000191854	0.000282233	0.000263855	0.00028589	0.000226169	0.000194724	0.000200184	0.00020824	0.000217496	0.000221081	0.000225148	0.000225802	0.000195115	5.31336e-05	0.000130529	0.000123544	0.000175859
Trueperella pyogenes	0.000188659	0.000212454	0.000196973	0.000248323	0.000236499	0.000191681	0.000194556	0.000178092	0.000230268	0.000221189	0.000188332	0.000201122	0.00025333	0.000313256	0.000261021	0.00027227	2.60432e-05	0.000129048	0.00012211	0.000117664
Paenibacillus odorifer	0.000188481	0.000231338	0.000174992	0.000206705	0.000248671	0.000214676	0.000210957	0.000171384	0.000204836	0.00021926	0.000193283	0.000195616	0.000222759	0.000260271	0.00021158	0.000246967	1.4802e-05	7.2948e-05	6.72696e-05	7.53862e-05
Cryptobacterium curtum	0.000186516	0.000176628	0.000220938	0.000182529	0.000173027	0.00016214	0.000170932	0.000149182	0.000158568	0.000150245	0.00014778	0.000140989	0.000162549	0.000160756	0.00014006	0.000147539	3.03022e-05	6.7301e-05	6.89086e-05	8.7611e-05
Bacillus lentus	0.000185801	0.000196068	0.000202645	0.000211195	0.000228847	0.000186478	0.000185528	0.000207961	0.000233026	0.00022869	0.000217087	0.000240825	0.000256126	0.000230252	0.00028906	0.000248571	3.88204e-05	8.97039e-05	9.00797e-05	0.000135619
Brachyspira pilosicoli	0.000184193	0.000190792	0.000190308	0.000193408	0.000220848	0.000200577	0.00021517	0.000175856	0.000176953	0.000207043	0.000200656	0.000176344	0.00028446	0.000298547	0.000277952	0.000273517	5.30638e-05	0.000111922	0.000108656	0.000142623
Desulfovibrio vulgaris	0.000183478	0.000189403	0.000208884	0.000182011	0.000192677	0.000191345	0.000204787	0.000184481	0.000177259	0.000181752	0.000181696	0.00018924	0.000327707	0.000260271	0.000364237	0.000313253	3.2746e-05	8.40569e-05	9.0148e-05	0.000105439
Ktedonobacterales bacterium SCAWS-G2	0.000183478	0.000197735	0.000197114	0.000222592	0.000235455	0.000222229	0.000194104	0.000184481	0.000184613	0.000219474	0.00020845	0.000207933	0.000262091	0.000256819	0.000258447	0.000229148	3.45613e-05	0.000119975	9.83433e-05	0.000133963
Leptotrichia sp. oral taxon 212	0.0001833	0.000169685	0.000181799	0.000161634	0.000195807	0.000181107	0.000185528	0.000164196	0.000180783	0.000240264	0.000187068	0.000184024	0.000200763	0.000190325	0.000212393	0.000206875	3.92393e-05	9.29439e-05	9.39725e-05	0.000129761
Desulfobacula toluolica	0.000183121	0.000178294	0.00018109	0.000170959	0.000138943	0.000145859	0.000150769	0.000155411	0.000144473	0.000157104	0.00013535	0.000138815	0.000123403	0.000120229	0.000124483	0.000117782	2.12953e-05	4.04547e-05	3.55129e-05	5.64123e-05
Gemmatirosa kalamazoonesis	0.000183121	0.000171074	0.000161804	0.000170096	0.00016694	0.00015123	0.000165666	0.000151418	0.000145699	0.000131384	0.000144409	0.000149248	0.00012042	0.000127284	0.000121774	0.000119029	2.29012e-05	5.83214e-05	6.20109e-05	7.92065e-05
Flavisolibacter tropicus	0.000182943	0.000166075	0.000126494	0.000118117	0.000114424	0.00014032	0.000137227	0.000169467	0.000146924	8.959e-05	0.000115022	0.000164318	6.50568e-05	5.50863e-05	7.78863e-05	6.55728e-05	1.19394e-05	3.54557e-05	2.72493e-05	2.77605e-05
Leptotrichia buccalis	0.000182585	0.000233282	0.000222924	0.000238479	0.000242237	0.000222397	0.000239847	0.000220259	0.000228736	0.000306492	0.000244895	0.000217641	0.000295086	0.00028819	0.000297729	0.000290801	3.12099e-05	0.000110626	9.54067e-05	0.000116136
Mucilaginibacter sp. HYN0043	0.000182585	0.000172185	0.000134009	0.000127442	0.000155289	0.000194199	0.000187935	0.000207801	0.000139417	9.55913e-05	0.000100065	0.000144611	0.000106253	9.29112e-05	9.61726e-05	8.32133e-05	4.5593e-05	7.3596e-05	6.86354e-05	7.70417e-05
Bacillus cellulosilyticus	0.000181156	0.000185515	0.000191158	0.0001903	0.000249541	0.000246567	0.000212311	0.000210197	0.000219544	0.000223118	0.000221933	0.000220829	0.000213066	0.000195128	0.000226886	0.000205093	3.33045e-05	8.50752e-05	7.92893e-05	0.000112188
Bifidobacterium pseudolongum	0.000179727	0.000153855	0.000231574	0.00027837	0.000141378	0.000147873	0.000153026	0.000151099	0.000151214	0.000206829	0.000161473	0.000141713	0.000148195	0.000216142	0.000184218	0.000199213	0.000356156	7.23926e-05	7.77868e-05	0.000102383
Paenibacillus ihbetae	0.000178833	0.000219397	0.000187613	0.000217584	0.000219979	0.000184632	0.000203734	0.000187197	0.000229349	0.000240907	0.000208872	0.000207933	0.00027514	0.000262823	0.000334979	0.000274586	2.09462e-05	0.000110626	8.29772e-05	0.00011257
Paenibacillus swuensis	0.000178833	0.000189125	0.000213848	0.000171305	0.000205197	0.000209137	0.00020885	0.000207322	0.000185532	0.000253981	0.000215718	0.000205614	0.00026526	0.000240758	0.000248152	0.000242334	4.49646e-05	7.97985e-05	8.13381e-05	0.000117409
Bacillus marisflavi	0.000178297	0.000171907	0.000173432	0.000191854	0.0001772	0.000163315	0.000170932	0.000187676	0.000207287	0.000239835	0.000219615	0.000184314	0.000211202	0.000214191	0.000239619	0.000222556	3.30252e-05	6.25798e-05	6.60403e-05	9.15586e-05
Caldithrix abyssi	0.000178297	0.000211065	0.000163789	0.000176658	0.000191633	0.000162308	0.000176198	0.000169627	0.000182928	0.000190325	0.000162631	0.000164752	0.000114828	0.000148598	0.000128817	0.000134175	1.77345e-05	6.44313e-05	5.9484e-05	7.43675e-05
Cytophaga hutchinsonii	0.000177762	0.00017524	0.000121247	0.000126406	0.000106598	0.000166504	0.000161453	0.000173301	0.000140949	8.01595e-05	8.33169e-05	0.000136931	3.01983e-05	2.89691e-05	3.54891e-05	3.08263e-05	1.06128e-05	1.80519e-05	1.6732e-05	2.20301e-05
Oxalobacter formigenes	0.000177762	0.00018496	0.000156982	0.00019479	0.000175635	0.000176911	0.000186129	0.000175377	0.000183234	0.000196112	0.000186436	0.000185328	0.000248111	0.000237456	0.000251539	0.000222377	5.11088e-05	7.6651e-05	6.38549e-05	8.85024e-05
Treponema putidum	0.000177226	0.000187181	0.00019598	0.000209814	0.000269887	0.000328308	0.000235634	0.000214509	0.000243444	0.000264269	0.000221195	0.000220974	0.00019517	0.000176966	0.000207652	0.000203668	4.64308e-05	9.00742e-05	7.71039e-05	0.00010875
Phascolarctobacterium succinatutens	0.000176868	0.00019829	0.000158259	0.000176485	0.000214588	0.000163147	0.000174242	0.000249649	0.000260909	0.000254196	0.000228674	0.000241695	0.000183054	0.000192877	0.00018029	0.000192798	0.000247235	0.000188202	0.000214921	0.000212278
Bacillus litoralis	0.00017669	0.000197179	0.000172298	0.000247804	0.000183113	0.000209976	0.0001929	0.000176495	0.000206215	0.000206186	0.000190439	0.000202282	0.000183054	0.000177567	0.000170266	0.000186027	2.28314e-05	7.17446e-05	5.64791e-05	7.90791e-05
Belliella baltica	0.000176154	0.000151356	0.000153295	0.000125025	7.87749e-05	0.000126892	0.000107735	0.000118196	7.79817e-05	4.26517e-05	4.99269e-05	7.31749e-05	3.76546e-05	3.82752e-05	3.73854e-05	4.88232e-05	4.32191e-05	4.98972e-05	5.92792e-05	6.97832e-05
Paenibacillus beijingensis	0.000174546	0.000201345	0.000184777	0.000246423	0.000201893	0.000192856	0.000210957	0.000198537	0.000179557	0.000196755	0.000212874	0.000182865	0.00025128	0.000274831	0.000244089	0.000260331	4.31493e-05	0.000114421	9.49969e-05	0.000127724
Arcticibacterium luteifluviistationis	0.000173295	0.000180516	0.000147907	0.000117599	0.000115467	0.000156769	0.00015423	0.00017346	0.000110461	8.20885e-05	8.44756e-05	0.000112878	9.45094e-05	8.13536e-05	9.11608e-05	8.69553e-05	2.00386e-05	5.10081e-05	4.83521e-05	5.43749e-05
Paenibacillus xylanexedens	0.000173295	0.000225229	0.000161379	0.000272844	0.000271973	0.000229447	0.000252185	0.000192467	0.000212956	0.000270485	0.000253216	0.000235029	0.000259482	0.000270028	0.000262511	0.000243938	1.60588e-05	0.000212827	0.00010169	0.000125814
Jeotgalibaca dankookensis	0.000172223	0.000153855	0.000166625	0.000175276	0.000190068	0.000161301	0.000205841	0.000212912	0.000207747	0.000219688	0.000230991	0.000207208	0.000302356	0.000294944	0.000285132	0.000259618	2.24125e-05	8.10945e-05	7.04794e-05	0.000104547
Dialister pneumosintes	0.000171866	0.000169408	0.000180381	0.000190127	0.000197546	0.000192856	0.00019606	0.000165155	0.00017159	0.000149388	0.000205606	0.000178373	0.000194425	0.000191226	0.000221332	0.000191016	2.48562e-05	8.57232e-05	7.07525e-05	9.90718e-05
Sphingobacteriaceae bacterium GW460-11-11-14-LB5	0.000171866	0.000136915	0.000132733	0.000102576	0.000109207	0.000142502	0.000156939	0.000167231	9.45279e-05	6.51564e-05	7.28891e-05	9.37508e-05	9.15269e-05	7.62502e-05	0.000106874	8.83807e-05	4.25907e-05	5.19338e-05	5.50449e-05	6.46895e-05
Bernardetia litoralis	0.000171509	0.000133027	0.000103237	9.10055e-05	7.40797e-05	9.80225e-05	0.000126243	0.000124265	0.000102341	8.78754e-05	8.31062e-05	0.000115196	9.17133e-05	8.34549e-05	8.56072e-05	0.000101032	3.53991e-05	3.54557e-05	3.74251e-05	3.74384e-05
Desulfotomaculum reducens	0.000169365	0.000204678	0.000216117	0.000236235	0.000236673	0.000203598	0.00021216	0.000230322	0.00024758	0.0002064	0.000245316	0.000218076	0.000240654	0.000245562	0.000241922	0.00024768	4.02866e-05	0.000108681	8.84407e-05	0.000131926
Negativicoccus massiliensis	0.000167757	0.000151078	0.000154572	0.000169232	0.000185199	0.000183624	0.000185828	0.000167551	0.000135281	0.000150888	0.000145778	0.000137221	0.000202068	0.000205936	0.000212934	0.000180503	2.46467e-05	7.57252e-05	6.43329e-05	8.06072e-05
Novibacillus thermophilus	0.000167757	0.000146357	0.00015599	0.000177176	0.000203458	0.000162979	0.000177402	0.000184641	0.000193958	0.00017425	0.0001877	0.000188226	0.000183613	0.000204735	0.000179206	0.000179969	2.03877e-05	7.91505e-05	7.05477e-05	9.01579e-05
Bacillus sp. Y1	0.000166864	0.000165242	0.000177403	0.000163361	0.000179982	0.000178253	0.000189741	0.000157967	0.00014003	0.000182181	0.000182223	0.000148813	0.000287629	0.000219595	0.000270367	0.000189591	3.53991e-05	6.62827e-05	6.93184e-05	9.44875e-05
Natranaerobius thermophilus	0.000166864	0.000190236	0.000202219	0.000168024	0.000212327	0.000181275	0.000188386	0.000179051	0.000169292	0.000163963	0.000188227	0.000156493	0.000202813	0.00018267	0.000166609	0.000183354	4.37078e-05	0.000104423	9.33579e-05	0.000122375
Halanaerobium hydrogeniformans	0.000165792	0.000158021	0.000165066	0.000162843	0.000201372	0.000161469	0.000175747	0.000160043	0.000149069	0.000169321	0.000150623	0.000169244	0.000199085	0.000200682	0.000222552	0.000198678	2.01782e-05	8.22054e-05	5.52498e-05	7.37308e-05
Capnocytophaga haemolytica	0.000165256	0.000147746	0.000119119	9.94672e-05	7.14713e-05	0.000126389	0.00012835	0.000136245	0.000121032	5.72262e-05	6.204e-05	0.0001236	1.88273e-05	2.22146e-05	1.639e-05	1.99569e-05	1.15204e-05	1.53672e-05	1.44783e-05	1.38802e-05
Salinispira pacifica	0.000164541	0.000165242	0.000125359	0.000134868	0.000180504	0.000162979	0.00016371	0.000182085	0.000181242	0.000153889	0.000162105	0.000171128	0.000144094	0.000174265	0.000175413	0.000156983	4.17528e-05	7.69287e-05	7.16404e-05	9.2832e-05
Lactobacillus reuteri	0.00016329	0.000186348	0.000171872	0.000156799	0.000172679	0.000159287	0.00016702	0.000196461	0.000210964	0.000195469	0.000196548	0.000181706	0.0001879	0.000200832	0.000161055	0.000204915	2.60432e-05	5.56368e-05	5.19717e-05	7.02926e-05
Flavobacterium sp. CJ74	0.000162576	0.000138303	0.000124366	0.000107065	8.79914e-05	0.000106247	0.000111948	0.000116439	8.24246e-05	4.7367e-05	5.69841e-05	8.85344e-05	7.00898e-05	7.67005e-05	7.55836e-05	7.02057e-05	4.04961e-05	4.87863e-05	4.53472e-05	4.26594e-05
Lysinibacillus sphaericus	0.000162397	0.000213565	0.000196831	0.000195999	0.000208675	0.000202088	0.000165967	0.0002086	0.000209279	0.000244765	0.000222249	0.000204745	0.000276445	0.000301248	0.000321975	0.000306838	2.31107e-05	8.81301e-05	8.36601e-05	8.77384e-05
Hymenobacter sp. sh-6	0.00016204	0.000127472	9.99753e-05	7.4255e-05	6.57327e-05	7.72095e-05	8.98296e-05	8.36954e-05	8.18118e-05	6.08698e-05	5.35082e-05	8.56364e-05	6.52432e-05	6.9946e-05	6.55599e-05	6.77111e-05	7.12172e-06	2.37914e-05	1.72784e-05	1.5281e-05
Mariniflexile sp. TRM1-10	0.000160789	0.000123584	0.000114156	9.65315e-05	5.16471e-05	6.15998e-05	7.01183e-05	6.45285e-05	4.01399e-05	3.75078e-05	4.25538e-05	4.02824e-05	7.13947e-05	5.7788e-05	4.49709e-05	5.73762e-05	2.91153e-05	3.34191e-05	3.33275e-05	3.88392e-05
Paenibacillus graminis	0.000160432	0.000148579	0.000133159	0.000164915	0.000135639	0.000165833	0.000175747	0.00014487	0.000127927	0.000144244	0.000148201	0.000130556	0.000175038	0.000225899	0.000214018	0.000204024	1.54304e-05	8.26683e-05	5.52498e-05	6.99105e-05
Candidatus Solibacter usitatus	0.000159896	0.000156633	0.000150885	0.00014851	0.000192503	0.000144348	0.000160249	0.000145509	0.000161326	0.000144673	0.000152941	0.000156058	0.000188087	0.000210138	0.000166473	0.000205806	4.99219e-05	9.97944e-05	8.74163e-05	9.01579e-05
Jeotgalibacillus malaysiensis	0.00015936	0.000148301	0.000154855	0.000179248	0.000175113	0.000139816	0.000139334	0.000178412	0.000189975	0.00024305	0.000203289	0.000206049	0.000194052	0.000187624	0.000179342	0.000182998	1.88516e-05	6.4061e-05	4.82838e-05	5.89592e-05
Carnobacterium maltaromaticum	0.000159003	0.000189125	0.00015755	0.000178557	0.000210936	0.000198227	0.000214267	0.000168828	0.000163317	0.000203614	0.00018928	0.000170693	0.000246992	0.000267626	0.000222958	0.000220595	5.04804e-05	9.4888e-05	9.6636e-05	0.000131926
Lactobacillus helveticus	0.000159003	7.58168e-05	0.000165349	7.11466e-05	0.000150246	9.18122e-05	9.2839e-05	9.87095e-05	0.000138958	0.000130527	0.000131664	9.70836e-05	8.03423e-05	7.27979e-05	9.30572e-05	7.57295e-05	8.16903e-06	3.99918e-05	3.43519e-05	4.21501e-05
Candidatus Cyclonatronum proteinivorum	0.000158824	0.000152467	0.000126777	0.000118463	0.000152333	0.00014502	0.000162054	0.000155731	0.000130378	0.000107594	0.000105015	0.000131425	6.89714e-05	5.88387e-05	6.00063e-05	6.05836e-05	6.54221e-05	7.55401e-05	7.73771e-05	8.77384e-05
Streptococcus gallolyticus	0.000158645	0.000173296	0.000157408	0.000161116	0.000175113	0.000165833	0.000163559	0.000178092	0.000200853	0.000224832	0.000195389	0.000195906	0.000170751	0.000198431	0.000222687	0.000174801	1.86422e-05	8.9241e-05	7.3416e-05	9.1686e-05
Desulfobacterium autotrophicum	0.000158467	0.000161354	0.000171305	0.000163706	0.000203458	0.000184967	0.000183872	0.000274566	0.000263973	0.000238121	0.000230148	0.000233725	0.000163854	0.0001513	0.000166203	0.000160368	1.82931e-05	7.84099e-05	5.64791e-05	7.78057e-05
Haliangium ochraceum	0.000157752	0.000159132	0.000171731	0.000173722	0.000149377	0.000159958	0.000149265	0.000167231	0.000182162	0.000190968	0.00016221	0.00016794	0.000149127	0.000124882	0.000138841	0.000145044	2.56242e-05	5.11006e-05	5.67523e-05	6.04873e-05
Arenibacter algicola	0.000157574	0.000170796	0.000154714	0.000119671	0.000258931	0.000398133	0.000322303	0.000436526	8.16586e-05	5.10106e-05	4.78203e-05	0.000111719	5.92781e-05	5.14839e-05	5.83808e-05	5.57725e-05	6.63298e-06	0.000146174	8.88505e-05	7.57683e-05
Streptococcus mutans	0.000156323	0.000142191	0.000115574	0.000156972	0.000155115	0.00018161	0.000159045	0.000153655	0.000168067	0.000185824	0.000178642	0.000156203	0.000219776	0.00018162	0.000187875	0.000185136	1.94102e-05	5.67476e-05	4.30252e-05	6.77457e-05
Caldanaerobacter subterraneus	0.000156144	0.000162187	0.000173007	0.000181666	0.000202937	0.00021518	0.000227809	0.000187356	0.000157189	0.000170178	0.000159366	0.000159681	0.000180817	0.000160456	0.000178664	0.000169812	3.45613e-05	9.89612e-05	8.45479e-05	0.000108622
Desulfotomaculum nigrificans	0.000155608	0.00016663	0.000200943	0.000191854	0.000213892	0.000194702	0.000195458	0.000159085	0.000165156	0.0002079	0.000186436	0.000168375	0.0001879	0.000187323	0.00018178	0.000199748	2.70905e-05	7.47995e-05	6.28987e-05	8.22627e-05
Enterococcus sp. FDAARGOS_553	0.000155251	0.000194124	0.000136704	0.000176831	0.000239977	0.000212998	0.000247521	0.000199815	0.000221995	0.000253338	0.000216877	0.00024807	0.000268429	0.000272279	0.000275108	0.000259975	1.84327e-05	8.24831e-05	6.33768e-05	0.000100855
Arachidicoccus sp. KIS59-12	0.000155072	0.000150245	0.000111604	8.53069e-05	8.46874e-05	0.000108765	0.000112701	0.000119154	6.94022e-05	5.27252e-05	5.22442e-05	6.24523e-05	5.05169e-05	4.95326e-05	4.80863e-05	5.30997e-05	1.94102e-05	4.75829e-05	3.55812e-05	3.04346e-05
Bacillus cohnii	0.000154536	0.000179683	0.00018733	0.000204288	0.000126944	0.00016835	0.000166569	0.000126661	0.000124709	0.000148102	0.000128504	0.000105488	0.000163854	0.000159705	0.000182999	0.000161259	2.26918e-05	4.61942e-05	4.56887e-05	7.06746e-05
Aerococcaceae bacterium ZY16052	0.000154358	0.000139969	0.000154572	0.00014402	0.000138421	0.000139313	0.000142945	0.000133849	0.000117662	0.000163534	0.000158839	0.000123745	0.00017336	0.000143945	0.000165661	0.000182107	3.05815e-05	7.60955e-05	7.35526e-05	8.65923e-05
endosymbiont 'TC1' of Trimyema compressum	0.000154358	0.000199679	0.000188606	0.000203942	0.000245889	0.000211991	0.000261965	0.000185759	0.000138804	0.000194397	0.000186541	0.000151421	0.000210456	0.000253067	0.000258718	0.00024768	4.4406e-05	9.03519e-05	9.90263e-05	0.000125304
Paenibacillus sp. FSL R7-0273	0.000154358	0.000212176	0.000181799	0.000186501	0.000228499	0.000188492	0.000185979	0.000216266	0.000197329	0.000245408	0.000232044	0.000214163	0.000166277	0.000194528	0.000199524	0.000189947	2.70207e-05	9.44251e-05	8.18162e-05	0.000101364
Saprospira grandis	0.000154358	0.000144968	0.000112313	9.13509e-05	8.5383e-05	0.0001138	0.000114356	0.000139439	8.794e-05	8.20885e-05	5.65628e-05	9.56345e-05	3.63498e-05	4.17275e-05	4.49709e-05	4.04484e-05	1.45227e-05	3.44374e-05	2.53371e-05	2.80152e-05
Solibacillus sp. R5-41	0.000154358	0.000123306	0.000151452	0.00013694	0.000116336	0.000142334	0.000142945	0.000121231	0.000126854	0.000149174	0.000127872	0.000119543	0.000115946	0.000105219	0.000111073	0.000122414	3.25365e-05	6.00803e-05	6.9933e-05	9.44875e-05
Defluviitoga tunisiensis	0.000153464	0.000168019	0.00014819	0.000155245	0.000162941	0.00015509	0.000171534	0.000139599	0.000158108	0.000164606	0.000129768	0.000148234	0.000159753	0.000192277	0.000200066	0.000196362	4.25907e-05	8.5538e-05	7.84698e-05	7.62776e-05
Thermosipho sp. 1063	0.000152929	9.83119e-05	0.00010267	0.000107065	7.14713e-05	5.50538e-05	0.000149566	4.52019e-05	4.16719e-05	8.23028e-05	6.13027e-05	3.83987e-05	7.08355e-05	7.7451e-05	3.35927e-05	6.48601e-05	2.16445e-06	9.72023e-06	1.15417e-05	1.23521e-05
Streptococcus merionis	0.00015275	0.000144968	0.000162655	0.000162498	0.000187112	0.00015979	0.000186882	0.000151898	0.000173888	0.000192683	0.000201182	0.000176924	0.000226301	0.000172464	0.000268877	0.00017694	1.78741e-05	0.000104145	7.77185e-05	0.00010442
Chitinophaga caeni	0.000152393	0.000144135	0.000137413	0.000110174	8.20789e-05	0.000139984	0.000134218	0.000145349	0.000119807	8.29458e-05	7.12038e-05	0.000117659	6.35655e-05	5.98894e-05	6.00063e-05	5.93363e-05	3.12099e-05	3.21231e-05	3.20982e-05	3.79478e-05
Desulfomonile tiedjei	0.000152214	0.000123029	0.00016152	0.000156454	0.000166071	0.000177246	0.000156337	0.000155092	0.000134208	0.000140386	0.000143356	0.000121572	0.000168327	0.000160155	0.000147916	0.000161972	3.53991e-05	8.72969e-05	8.55723e-05	9.6907e-05
Salmonella enterica	0.000152214	0.000148856	0.00014663	0.000137803	0.000128857	0.000139816	0.000172136	0.000141356	0.000144933	0.000143387	0.000151361	0.000156928	0.000143349	0.00013734	0.000147239	0.000133106	2.35296e-05	6.25798e-05	6.17377e-05	7.20753e-05
Mucilaginibacter sp. PAMC 26640	0.000152035	0.000136359	0.000101819	7.4255e-05	8.43396e-05	0.000104736	0.000112851	0.000121869	7.23131e-05	5.65832e-05	5.40349e-05	7.95506e-05	3.35536e-05	2.74681e-05	3.49472e-05	2.33425e-05	7.88975e-05	6.81342e-05	7.56014e-05	8.22627e-05
Paraliobacillus sp. X-1125	0.000152035	0.000180238	0.000161237	0.000182011	0.000188156	0.000174729	0.000195458	0.000186079	0.000180936	0.000179609	0.000188753	0.000202716	0.000189951	0.000194828	0.000201285	0.000186205	2.57639e-05	6.85971e-05	6.10548e-05	7.84424e-05
Bacillus infantis	0.000151857	0.000138581	0.000143652	0.000170959	0.000130248	0.000139481	0.000150619	0.000142154	0.000150601	0.000160533	0.000142092	0.000140409	0.000194798	0.000198881	0.000169453	0.00020242	2.339e-05	6.09135e-05	6.00304e-05	8.13713e-05
Veillonella parvula	0.000151857	0.000134971	0.000108909	0.000133832	0.000189721	0.000101547	0.000129704	0.000210995	0.000243597	0.000205328	0.000230886	0.000212859	0.000133283	0.000161356	0.000130984	0.000158586	1.4802e-05	4.56388e-05	4.84887e-05	5.45022e-05
Bifidobacterium adolescentis	0.000151321	0.000140803	0.000189598	0.000139876	0.000145899	0.000141663	0.000165214	0.00015637	0.000153512	0.000153675	0.000165159	0.00014635	0.000126945	0.000120529	0.000102404	0.000128651	1.75948e-05	4.89715e-05	8.28406e-05	6.53262e-05
Bifidobacterium angulatum	0.000150427	0.00014358	0.000112171	0.000128133	0.000124683	0.000121689	0.000118419	0.000110369	0.000125169	0.000147459	0.000115654	0.000121137	9.20861e-05	0.00010612	8.79099e-05	9.99629e-05	1.16601e-05	5.32298e-05	4.59618e-05	5.15734e-05
Brevefilum fermentans	0.000150427	0.000174129	0.000186337	0.00016198	0.000185547	0.000195542	0.000171534	0.000146307	0.000184919	0.000180895	0.000188227	0.00015403	0.00018324	0.000165259	0.000216185	0.000182463	3.67956e-05	9.63692e-05	0.000102987	0.000132308
Aneurinibacillus soli	0.00015007	0.000156633	0.000131173	0.000158353	0.000158419	0.000150391	0.000145352	0.000141036	0.00014769	0.000176179	0.000157997	0.000145336	0.000180444	0.000178618	0.000177852	0.000166783	1.98291e-05	6.61902e-05	6.04402e-05	7.233e-05
Leadbetterella byssophila	0.000149713	0.000140247	0.000141525	0.000107411	0.000109033	0.00015358	0.000162656	0.000183044	0.000117356	7.24436e-05	8.1421e-05	0.000134033	5.90917e-05	5.28348e-05	6.46118e-05	5.41688e-05	5.93477e-05	7.0356e-05	7.10257e-05	8.90118e-05
Selenomonas sp. oral taxon 136	0.000148462	0.000214398	0.000186621	0.000188228	0.000215457	0.000178757	0.000207496	0.0001503	0.000129765	0.000182181	0.000182644	0.000152581	0.000172242	0.000156853	0.000160107	0.000189591	1.83629e-05	0.000108496	0.000109407	0.000104038
Acetohalobium arabaticum	0.000148283	0.000165242	0.000168469	0.000150755	0.000185199	0.000173721	0.000188988	0.000180009	0.000160713	0.000192254	0.000175798	0.00016142	0.00016665	0.000172013	0.000159701	0.000159656	2.40184e-05	6.44313e-05	5.42254e-05	7.00379e-05
Hymenobacter sp. PAMC 26554	0.000148105	0.000174129	0.000120538	0.000108965	9.56428e-05	0.000129746	0.000135722	0.000131133	0.00011567	9.55913e-05	8.64768e-05	0.000115486	0.000100102	8.34549e-05	9.49535e-05	7.84023e-05	1.22885e-05	3.46225e-05	2.51322e-05	3.79478e-05
Niabella soli	0.000147569	0.000104699	0.000130748	8.18532e-05	4.95604e-05	8.14057e-05	7.97482e-05	8.43343e-05	4.35104e-05	4.56523e-05	3.13887e-05	4.59336e-05	4.56702e-05	4.29283e-05	3.278e-05	5.41688e-05	0.000134824	9.93315e-05	0.000113436	0.000106967
Streptococcus constellatus	0.000147212	0.000123862	0.000142234	0.000169405	0.000101729	8.72803e-05	0.000100362	0.000114522	0.000110461	0.000191397	0.00010986	0.000113168	0.000111286	0.000113175	0.000146562	0.00010709	7.12172e-06	3.32339e-05	2.26736e-05	2.75058e-05
Mesotoga prima	0.000147033	0.000129139	0.000160528	0.000133832	0.000144508	0.000162644	0.000160399	0.000120592	0.000125782	0.000145316	0.000135456	0.000126788	0.000160312	0.00013674	0.000132881	0.000148252	3.14892e-05	7.80396e-05	8.13381e-05	9.55062e-05
Luteitalea pratensis	0.000146676	0.000141913	0.000149041	0.000143502	0.000155115	0.000146866	0.000155885	0.000148543	0.000143554	0.000122168	0.000150097	0.000144176	0.00018063	0.000216593	0.000177174	0.000206697	2.4158e-05	7.65584e-05	6.63134e-05	6.5963e-05
Thermovirga lienii	0.000146318	0.000105255	0.000101393	0.000105511	0.000119988	0.000113968	0.00011887	0.000107175	0.000100809	0.000106951	0.000107122	0.000104473	0.000133096	0.000110323	0.000140466	0.000119029	1.71061e-05	5.04526e-05	5.29961e-05	7.22027e-05
Sutterella megalosphaeroides	0.000145961	0.000168297	0.000133584	0.0001511	8.52091e-05	0.000102722	0.000110594	0.000112126	8.28843e-05	9.85919e-05	8.61609e-05	7.75219e-05	0.000244569	0.000317609	0.000190584	0.000353523	0.000902574	0.000103405	0.000110909	0.000225777
Bacillus mesonae	0.000145782	0.000162465	0.000152019	0.000159044	0.000192677	0.000180771	0.000178155	0.000161641	0.000181089	0.000182181	0.000168003	0.000207498	0.000201881	0.000172614	0.000190991	0.000181394	2.09462e-05	6.0358e-05	5.22449e-05	7.92065e-05
Acholeplasma oculi	0.000145425	0.000109698	0.000219804	0.000153	0.000165549	0.000298264	0.000233527	0.000177453	0.000125169	0.000117667	0.000133771	0.000110559	0.000158634	0.000221246	9.54954e-05	0.000204024	0.000184467	0.00016941	0.0002574	0.0003861
Rhizobium leguminosarum	0.000145068	0.000148579	0.000147198	0.000157662	0.000160158	0.000144013	0.000142042	0.000137842	0.000142634	0.000163105	0.000144409	0.000130845	0.000135706	0.00012188	0.000156043	0.000126513	1.48718e-05	7.41515e-05	6.44695e-05	9.09219e-05
Marivirga tractuosa	0.000144889	0.000161354	0.000137838	0.000135904	0.000116858	0.000158112	0.00015754	0.000203009	0.000170824	0.000103736	0.000107543	0.00016823	2.38604e-05	2.5817e-05	3.75209e-05	2.51244e-05	9.28617e-06	2.53652e-05	2.02833e-05	2.71238e-05
Pedobacter ginsengisoli	0.000144889	0.000111365	0.000134577	8.39254e-05	8.8687e-05	0.000133942	0.000128199	0.000136404	8.80933e-05	6.34417e-05	5.91961e-05	9.51998e-05	6.58024e-05	5.62871e-05	7.16554e-05	5.47034e-05	1.19394e-05	3.453e-05	3.27128e-05	3.22174e-05
Acholeplasma palmae	0.000144174	0.000137192	0.000345446	0.000169578	0.000221196	0.00042952	0.000354504	0.000203808	0.000134668	0.000128384	0.000119761	0.000111863	0.000139434	0.00012083	0.000141143	0.000138986	0.000245769	0.000209679	0.000342699	0.000526176
Rufibacter sp. DG31D	0.000144174	0.000116919	8.5369e-05	6.37211e-05	6.71239e-05	8.89588e-05	9.55474e-05	0.000105578	7.04746e-05	4.99389e-05	5.47722e-05	7.05667e-05	4.25013e-05	3.032e-05	4.5919e-05	3.51028e-05	1.20092e-05	1.99959e-05	1.9737e-05	2.06293e-05
Streptococcus dysgalactiae	0.000143102	0.000201067	0.000147056	0.000211886	0.000121901	0.000141663	0.000164161	0.00016228	0.000145545	0.000199113	0.000130927	0.000156203	0.000147822	0.000142594	0.000164035	0.000132037	1.33358e-05	3.777e-05	3.09372e-05	3.32362e-05
Clavibacter michiganensis	0.000142924	0.000123862	0.00011841	0.000112764	0.00012677	0.0001091	0.0001285	0.000107015	0.000113985	0.000100521	0.000123448	0.000104473	0.000148382	0.000155803	0.000156585	0.000140055	1.33358e-05	5.29521e-05	4.50057e-05	5.93412e-05
Pontibacter korlensis	0.000142567	0.000121918	6.62248e-05	5.85406e-05	5.59945e-05	5.75715e-05	6.36481e-05	8.4494e-05	7.09342e-05	7.0086e-05	5.17176e-05	7.72321e-05	2.81478e-05	3.18209e-05	3.31863e-05	2.94009e-05	3.7005e-06	1.44415e-05	1.33173e-05	1.5663e-05
Ignavibacterium album	0.000142388	0.000129972	0.000123941	0.000102748	0.000121032	0.000156433	0.000140086	0.000143911	0.000122718	9.06617e-05	8.46862e-05	0.000121427	7.19539e-05	6.2291e-05	6.88108e-05	6.91366e-05	1.50115e-05	4.91566e-05	3.8108e-05	4.59703e-05
Terribacillus goriensis	0.000142388	0.000132471	0.000139256	0.00014402	0.000133378	0.000117661	0.000131509	0.000113724	0.000115977	0.000131813	0.00014304	0.000121862	0.000203745	0.00019783	0.000199795	0.000215428	1.80836e-05	5.50813e-05	4.49374e-05	6.25247e-05
Tenericutes bacterium MO-XQ	0.000142031	0.000178017	0.00020931	0.000197207	0.000152681	0.000235657	0.000191245	0.000163717	0.000124709	0.000153246	0.00014462	0.000125774	0.00020971	0.000206836	0.000210903	0.000213468	8.09921e-05	0.000108774	0.000144852	0.00019496
Caldilinea aerophila	0.000141673	0.000138859	0.000116567	0.000113455	0.000148855	0.000132767	0.000143095	0.000124106	0.00013145	0.000121311	0.000130716	0.000124325	0.000126199	0.000146947	0.000141279	0.000140946	5.13881e-05	7.61881e-05	8.00405e-05	8.18807e-05
Brevibacillus agri	0.000141495	0.00015691	0.000153437	0.000231917	0.000166245	0.000156098	0.000159196	0.000158925	0.000166075	0.000178323	0.000202657	0.000171707	0.000182495	0.000134639	0.000180154	0.000142728	1.73156e-05	0.000119235	7.81966e-05	8.7993e-05
Thermaerobacter marianensis	0.000141495	0.000160798	0.000187188	0.000159735	0.000204154	0.000190674	0.000197415	0.000152377	0.000174654	0.000144459	0.000182433	0.000167505	0.000153788	0.000153251	0.000159294	0.00015039	2.79981e-05	9.94241e-05	9.10359e-05	0.000115499
Opitutaceae bacterium TAV5	0.000141316	0.000142469	0.000155281	0.000158008	0.000143116	0.000143845	0.000131208	0.000147425	0.000125782	0.000151746	0.00013535	0.000132874	0.00014484	0.000143344	0.000158075	0.000147539	1.98989e-05	6.44313e-05	6.69281e-05	7.28394e-05
Paenibacillus sp. IHBB 10380	0.00014078	0.000202178	0.000177403	0.000216721	0.000228673	0.000221054	0.000224649	0.000232718	0.000242218	0.000271556	0.000253216	0.000237058	0.000213811	0.000218094	0.000179748	0.000193867	3.90298e-05	0.000115532	0.000106061	0.000146698
Candidatus Arthromitus sp. SFB-rat-Yit	0.000140423	0.000188292	0.000143369	0.000143675	0.000192155	0.000165665	0.000181615	0.000153175	0.000191201	0.000181752	0.000203921	0.000166781	0.000227233	0.000238507	0.000206974	0.000216319	2.59733e-05	6.81342e-05	6.50159e-05	8.88844e-05
Rufibacter sp. DG15C	0.000140423	0.000134693	8.11147e-05	7.27008e-05	7.14713e-05	7.90559e-05	8.18548e-05	8.89663e-05	5.00983e-05	3.98654e-05	3.339e-05	4.83969e-05	3.52313e-05	3.13707e-05	3.63018e-05	2.70844e-05	4.46853e-06	2.70315e-05	2.28785e-05	2.012e-05
Selenomonas sp. oral taxon 478	0.000140065	0.000129416	0.000145496	0.00016716	0.00015355	0.000143173	0.000133616	0.000111168	0.000130684	0.000165463	0.000137246	0.000118529	0.000201881	0.000257419	0.000167557	0.000232712	8.79742e-06	9.00742e-05	6.65866e-05	6.86371e-05
Bacillus megaterium	0.000139887	0.000145524	0.000151026	0.000144884	0.000127466	0.000136292	0.000126995	0.000126661	0.000123943	0.000158604	0.000125133	0.000117659	0.000120793	0.00013734	0.000120013	0.000127226	2.26918e-05	5.87843e-05	6.50841e-05	7.81877e-05
Bifidobacterium animalis	0.000138636	0.000127194	0.000128195	0.000148855	0.000151985	0.000127899	0.000149114	0.000147106	0.000148303	0.000174036	0.000149886	0.000158522	0.000117811	0.000117527	0.000107009	0.000126156	2.62526e-05	5.2767e-05	4.52106e-05	6.13787e-05
Ureibacillus thermosphaericus	0.000137564	0.000164409	0.000126494	0.000178385	0.000166245	0.000163315	0.000158744	0.000179849	0.000159487	0.000175322	0.000174323	0.000156493	0.00014484	0.000144095	0.00013708	0.000120633	1.92007e-05	6.74862e-05	5.01278e-05	6.41802e-05
Laceyella sacchari	0.000137386	0.000175517	0.000185061	0.000186156	0.000239803	0.000222733	0.000184324	0.000150939	0.000172203	0.000151103	0.000167266	0.000153595	0.000164599	0.000161206	0.000170808	0.000177652	2.72999e-05	7.44292e-05	7.4577e-05	0.000105948
Lacunisphaera limnophila	0.000137386	0.000121362	0.000140674	0.00012537	9.89469e-05	8.94624e-05	7.94473e-05	9.51955e-05	0.000104486	9.0876e-05	9.92219e-05	8.41874e-05	5.48043e-05	6.51429e-05	6.13608e-05	5.4347e-05	1.18695e-05	3.24933e-05	3.38055e-05	3.78205e-05
Ammonifex degensii	0.000137207	0.000122196	0.000138831	0.000125543	0.000159463	0.000154755	0.000180713	0.000143911	0.000114751	0.000138243	0.000128293	0.000132294	0.000144653	0.0001525	0.000143988	0.000162863	2.20634e-05	5.00823e-05	4.96497e-05	6.64723e-05
Desulfococcus oleovorans	0.000137207	0.000129416	0.000134435	0.000126752	0.000139812	0.000122192	0.000146406	0.000128897	0.000134515	0.000141244	0.000123869	0.000129541	0.000129741	0.000140042	0.000115678	0.000131502	1.73156e-05	4.18433e-05	4.17276e-05	4.96632e-05
Spirochaeta africana	0.00013685	0.000132749	0.000120963	0.000134522	0.000138073	0.00015123	0.000136776	0.000158606	0.000141562	0.000155818	0.000152414	0.000150552	9.89833e-05	0.000117677	0.000118794	0.000113505	3.2327e-05	8.01688e-05	6.88403e-05	7.233e-05
Aerococcus sanguinicola	0.000136671	0.000131916	0.000146772	0.000122952	0.00014016	0.000143845	0.000143246	0.000120592	0.000112913	0.000138672	0.000116707	0.000100706	0.000113896	0.000110773	9.68499e-05	0.000113327	5.13881e-05	8.07242e-05	9.79335e-05	0.000141731
Spirosoma aerolatum	0.000135778	0.000121918	0.000113022	0.000101885	9.84252e-05	9.50013e-05	0.000103673	8.27371e-05	8.45695e-05	0.000100735	7.7313e-05	7.4479e-05	9.05948e-05	7.09967e-05	0.000102268	8.92717e-05	8.65778e-06	5.80437e-05	3.55812e-05	4.72437e-05
Echinicola strongylocentroti	0.000135599	0.000114697	7.26062e-05	6.02674e-05	7.16452e-05	0.000101547	9.73531e-05	0.000112446	7.599e-05	5.50829e-05	4.44497e-05	8.79548e-05	2.21827e-05	3.15208e-05	2.43818e-05	2.69062e-05	0.00012854	9.86835e-05	0.000112139	0.000109259
Spirochaeta thermophila	0.000135599	0.000152744	0.000131315	0.000131069	0.000165549	0.000154083	0.000180713	0.000151259	0.00015581	0.000150245	0.000141776	0.000164897	0.000157702	0.00018222	0.00018625	0.000164645	2.01084e-05	7.53549e-05	6.61769e-05	7.60229e-05
Syntrophus aciditrophicus	0.00013542	0.000138859	0.000136562	0.000121226	0.000169027	0.000161469	0.000189891	0.000140397	0.000135127	0.000146173	0.000141565	0.000137946	0.000118183	0.000123381	0.000120148	0.000100676	2.42278e-05	4.13804e-05	3.48299e-05	4.71164e-05
Acholeplasma hippikon	0.000135242	0.000120252	0.000290708	0.000171305	0.000181374	0.000350632	0.000261514	0.000205086	0.000133136	0.000174893	0.000134403	0.000139539	0.00014745	0.000162407	0.000147374	0.000148073	0.000308329	0.000236155	0.000431413	0.00064333
Aneurinibacillus sp. XH2	0.000135242	0.000121085	0.00013245	0.000164397	0.0001339	0.000126724	0.00013497	0.000144071	0.000136506	0.000169749	0.000146621	0.000130121	0.000150059	0.000159855	0.000158888	0.000188344	1.06128e-05	5.09155e-05	4.82838e-05	5.29741e-05
Coxiella burnetii	0.000134706	0.000119141	2.68019e-05	2.79751e-05	3.80832e-05	3.47443e-05	3.58115e-05	4.1688e-05	4.73405e-05	4.32947e-05	3.38113e-05	4.02824e-05	4.25013e-05	4.7131e-05	3.49472e-05	4.93578e-05	9.0767e-06	2.02736e-05	1.22246e-05	1.73185e-05
Fuerstia marisgermanicae	0.000134706	0.000121085	0.000126494	0.000137113	0.000132683	0.000140152	0.000129252	0.000130175	0.000134974	0.000129241	0.000124712	0.000130701	9.30182e-05	9.05096e-05	8.96708e-05	8.55298e-05	4.02866e-05	8.35014e-05	7.74454e-05	8.22627e-05
Niabella ginsenosidivorans	0.000134706	0.000132193	0.000102102	8.37527e-05	8.90348e-05	0.000112457	0.000122782	0.000107494	8.48759e-05	7.84448e-05	6.87812e-05	7.94057e-05	7.23267e-05	6.33417e-05	8.57426e-05	6.36128e-05	3.58879e-05	5.49887e-05	5.13571e-05	5.08093e-05
Desulfatibacillum alkenivorans	0.000134527	0.000155799	0.000132733	0.00013953	0.000139291	0.000145523	0.000149867	0.000129696	0.00014815	0.000143173	0.000137984	0.000128817	0.000126572	0.000110623	0.000103216	0.000112614	2.50657e-05	4.28616e-05	4.28203e-05	6.06146e-05
Singulisphaera acidiphila	0.000134527	0.000135248	0.000120112	0.000154554	0.000155811	0.000140656	0.000137378	0.000135925	0.000145392	0.000174679	0.000143566	0.000134033	0.00011371	0.00010567	0.000106196	0.000106199	1.20092e-05	7.50772e-05	5.25864e-05	6.57083e-05
Bacillus sp. 1NLA3E	0.00013417	0.000130249	0.000152728	0.000133659	0.000150246	0.000146866	0.000146255	0.000145828	0.000132216	0.000141029	0.000130611	0.000142872	0.000156584	0.000158354	0.000147781	0.000163576	3.23969e-05	5.70254e-05	5.55913e-05	7.09293e-05
Anaerolinea thermophila	0.000133991	0.000173296	0.00014663	0.000126233	0.000210936	0.00021048	0.000140537	0.000125064	0.000171744	0.000134171	0.000142197	0.000135192	0.000194798	0.000169462	0.000220384	0.000189591	2.63224e-05	7.41515e-05	7.91527e-05	0.00010875
Brochothrix thermosphacta	0.000133812	0.000108032	0.000153721	0.000117599	0.000121553	0.000139481	0.000116162	0.000130974	0.000106325	0.000110809	0.000107964	0.000110559	0.000140925	0.000168561	0.000126108	0.000148608	4.8316e-05	7.13743e-05	9.18554e-05	0.000122757
Oceanobacillus sp. 160	0.000133812	0.000129694	0.000149041	0.00013953	0.000129205	0.000120682	0.000132864	0.000135606	0.000136353	0.000151531	0.0001383	0.000140699	0.000138688	0.000135389	0.000121774	0.000142371	3.65163e-05	6.86896e-05	6.8772e-05	8.81204e-05
Paenibacillus sp. DCT19	0.000133812	0.000200512	0.000147907	0.000163534	0.000204676	0.000190674	0.000222693	0.000213072	0.000212496	0.00022076	0.000211189	0.000212135	0.000147077	0.000156853	0.000144801	0.000143262	3.38631e-05	9.14628e-05	7.73771e-05	0.000115754
Moraxella osloensis	0.000133634	0.000123029	8.42345e-05	0.000100676	0.000128161	9.28193e-05	0.000110895	0.000103182	0.000127007	0.000129884	9.62726e-05	0.000125484	5.96509e-05	6.85952e-05	4.60545e-05	6.34346e-05	4.33587e-05	4.56388e-05	4.65765e-05	5.46295e-05
Lactobacillus acidophilus	0.000133276	8.41483e-05	9.44447e-05	8.61703e-05	7.5297e-05	8.07343e-05	8.29081e-05	6.58063e-05	9.37619e-05	9.38766e-05	0.000107859	0.000113747	8.38841e-05	8.2104e-05	8.42526e-05	0.000102279	1.80138e-05	2.65686e-05	3.23713e-05	5.76857e-05
Akkermansia glycaniphila	0.000133098	0.000135248	0.000132166	0.000127615	0.000136161	0.000167679	0.000176349	0.000154613	0.000136506	0.000113166	0.000117339	0.000144321	0.00010849	0.000107321	7.69381e-05	0.000102992	3.19081e-05	6.86896e-05	6.44012e-05	7.62776e-05
Pseudomonas fluorescens	0.000132741	0.000146912	0.000129613	0.00014661	0.000149377	0.000167008	0.000150017	0.000146946	0.000140796	0.000120239	0.000150623	0.000164607	0.000142789	0.00015115	0.000163358	0.000149321	4.39173e-05	8.34089e-05	7.96991e-05	9.29594e-05
Sandaracinus amylolyticus	0.000132562	0.000174962	0.00015755	0.000169232	0.000163288	0.000141327	0.000147309	0.000143113	0.00015627	0.000186682	0.00015747	0.000151566	0.000133655	0.000129685	0.000121909	0.000157339	2.03179e-05	5.61922e-05	4.74643e-05	6.48169e-05
Leptotrichia sp. oral taxon 498	0.000132026	0.000101645	9.54374e-05	0.000121571	0.000115119	0.000119675	0.000116011	0.000135127	0.000148916	0.000181966	0.00014009	0.000140844	8.5189e-05	8.91587e-05	0.000123399	8.30351e-05	5.44602e-06	4.02695e-05	3.33957e-05	4.30415e-05
Fluviicola taffensis	0.000131669	0.00012164	0.000113731	8.75518e-05	8.13834e-05	0.000101212	9.37418e-05	9.04038e-05	5.48476e-05	2.93632e-05	3.79192e-05	5.28888e-05	2.51652e-05	3.01699e-05	3.56245e-05	2.74408e-05	0.000324457	0.000162004	0.000227829	0.000199162
Treponema denticola	0.00013149	0.000164131	0.000179105	0.000201525	0.000199633	0.000165665	0.000185678	0.000187516	0.000154431	0.000250981	0.000190649	0.000184169	0.000176716	0.000198731	0.000235013	0.000156983	3.94488e-05	0.000108774	8.20893e-05	9.2068e-05
Brachyspira murdochii	0.000131311	0.00013747	0.000136562	0.000122952	0.000129553	0.000160294	0.000151221	0.000118196	0.000109848	0.000132456	0.000129873	0.000122586	0.000169073	0.000156103	0.000183812	0.000184424	2.61828e-05	6.64679e-05	5.88011e-05	8.08619e-05
Streptococcus acidominimus	0.000131311	0.000111087	0.000127344	0.000112246	0.000108685	7.38526e-05	9.07324e-05	8.96052e-05	0.000105865	0.000168249	0.000132612	9.80979e-05	0.000179698	0.000175916	0.000159836	0.000172663	1.36849e-05	3.25859e-05	2.69761e-05	4.82625e-05
Salinibacter ruber	0.000130775	0.000146912	0.000124508	0.000138667	0.000153724	0.000157944	0.000164763	0.000178891	0.000150448	0.000123026	0.000145673	0.000160695	0.00011576	0.000189875	0.000152251	0.000149499	1.7525e-05	5.43407e-05	4.72594e-05	5.6285e-05
Fibrella sp. ES10-3-2-2	0.000130597	0.000127472	0.000101819	6.8211e-05	7.37319e-05	9.24836e-05	8.95287e-05	0.000102703	6.74105e-05	7.26579e-05	6.1092e-05	7.91158e-05	7.84782e-05	6.09401e-05	7.5719e-05	8.08969e-05	1.50115e-05	3.85106e-05	3.31909e-05	3.74384e-05
Pelodictyon phaeoclathratiforme	0.000130418	0.000146635	0.000122665	0.000187882	4.60825e-05	0.000121689	0.000103522	3.65768e-05	3.11007e-05	6.34417e-05	4.8031e-05	4.02824e-05	6.72937e-05	6.66439e-05	7.01654e-05	6.55728e-05	1.34754e-05	3.55483e-05	3.66739e-05	5.00453e-05
Streptococcus parauberis	0.000130418	0.000106643	0.000127486	9.75676e-05	9.1991e-05	8.34199e-05	8.42623e-05	8.94455e-05	9.49875e-05	0.000124311	9.76419e-05	9.7953e-05	9.8424e-05	6.93457e-05	8.73681e-05	9.533e-05	1.61984e-05	4.19359e-05	4.51423e-05	5.15734e-05
Rhodothermus marinus	0.000130239	0.000110254	0.000115858	0.000105166	0.00011738	0.000121689	0.000122933	0.000137682	0.00010418	0.000117239	0.000107543	0.000113168	0.00012303	0.000135089	0.000119742	0.000132927	1.80138e-05	5.48036e-05	5.09473e-05	6.21427e-05
Thermoanaerobacterium xylanolyticum	0.000130061	0.000148856	0.000170029	0.000191163	0.0001812	0.000181778	0.000198016	0.000175856	0.000157189	0.000178323	0.000161894	0.000161275	0.000215862	0.000183721	0.000204807	0.000172841	2.75792e-05	8.62786e-05	7.58063e-05	9.85624e-05
Mucilaginibacter sp. BJC16-A31	0.000129882	0.000104977	0.000103095	8.18532e-05	7.04279e-05	0.000108765	0.000108488	0.000110689	8.53356e-05	6.4942e-05	5.85641e-05	9.2012e-05	4.71615e-05	3.69243e-05	3.69791e-05	3.68847e-05	1.52209e-05	2.29583e-05	2.4859e-05	3.38729e-05
Lactobacillus agilis	0.000129703	0.000126917	0.000136137	0.000126579	0.000138247	0.0001185	0.000153177	0.000131932	0.000122565	0.000141029	0.000134508	0.000126064	0.000164599	0.000163908	0.00016241	0.000164823	1.8712e-05	4.30467e-05	4.18642e-05	6.03599e-05
Archangium gephyra	0.000128989	0.00012525	0.000110186	0.000130033	0.00015355	0.000134781	0.000114206	0.000101584	0.000121032	0.000138886	0.000126713	0.00011621	8.63074e-05	8.42054e-05	0.000101455	8.17878e-05	1.17299e-05	4.91566e-05	3.96105e-05	4.08767e-05
Mucilaginibacter gotjawali	0.000128989	0.000122196	0.000110895	9.06602e-05	0.000115293	0.000145859	0.000132412	0.000162599	9.77452e-05	8.29458e-05	8.40542e-05	0.000108386	4.77207e-05	4.93825e-05	4.2939e-05	5.09615e-05	5.03408e-05	6.19318e-05	6.07133e-05	5.37382e-05
Streptococcus equinus	0.000128989	0.00014358	0.000142234	0.000178557	0.00016068	0.000128235	0.000145954	0.000153335	0.000149376	0.000205543	0.000179695	0.000149972	0.000254635	0.000210288	0.000280662	0.000245363	2.27616e-05	7.23e-05	5.6684e-05	6.65997e-05
Bacillus thermoamylovorans	0.00012881	0.000165519	0.000186904	0.00016716	0.000209371	0.000212326	0.000199371	0.000177613	0.000174348	0.000205114	0.000195916	0.000170983	0.000177461	0.000155352	0.000191668	0.000163754	6.02554e-05	9.97018e-05	0.000104148	0.000145806
Flavobacterium commune	0.00012881	0.000112753	9.85572e-05	6.99378e-05	5.14732e-05	7.38526e-05	6.92155e-05	8.11398e-05	4.90258e-05	3.90081e-05	3.36006e-05	5.28888e-05	3.00119e-05	3.30217e-05	1.88282e-05	2.1917e-05	3.19779e-05	3.61963e-05	3.28494e-05	3.56556e-05
Acidobacteriaceae bacterium SBC82	0.000128274	0.000138581	0.000131457	0.000140739	0.000122771	0.000115814	0.000104124	0.000124585	0.000114138	0.000106951	9.16381e-05	0.000119398	7.73598e-05	7.2948e-05	9.34635e-05	7.96496e-05	5.78116e-05	8.03539e-05	6.76793e-05	6.36708e-05
Methanocorpusculum labreanum	0.000128274	0.000162742	0.000168185	0.000153691	0.000219283	0.000190003	0.00017334	0.000155092	0.000143247	0.000184538	0.000182749	0.000132439	0.000140366	0.000191526	0.000193564	0.000163932	2.86265e-05	8.38717e-05	6.95233e-05	9.23227e-05
Lactobacillus coryniformis	0.000128095	0.000138859	0.000124366	0.00013504	0.000126249	0.000123703	0.000117666	0.000131613	0.000122565	0.000180037	0.000136509	0.000113747	0.000234316	0.000215842	0.00023989	0.000219883	2.54148e-05	6.98005e-05	6.19426e-05	8.96485e-05
Parascardovia denticolens	0.000127738	0.000118308	0.000150459	0.000119153	0.000114076	0.000116318	0.000115108	9.31191e-05	0.000108316	0.000143601	0.000121763	9.47651e-05	0.000129554	0.000117377	0.000136673	0.000144866	3.35838e-05	7.6003e-05	7.48502e-05	6.6345e-05
Streptococcus intermedius	0.00012756	6.5819e-05	9.45865e-05	0.000100158	7.40797e-05	6.64673e-05	9.73531e-05	5.86187e-05	6.404e-05	8.42318e-05	6.75172e-05	7.34647e-05	0.000114642	0.000104469	0.000158211	0.000108694	1.07524e-05	4.33245e-05	3.4147e-05	4.88992e-05
Thermoplasmatales archaeon BRNA1	0.00012756	0.000155244	0.000164782	0.000153173	0.000168158	0.000143677	0.00015739	0.000166113	0.000168067	0.000207472	0.000161789	0.000196051	0.000158261	0.000144095	0.000174601	0.000164288	1.12412e-05	7.06337e-05	6.04402e-05	7.58956e-05
Lactobacillus amylovorus	0.000127024	0.000113864	7.74277e-05	0.000123989	0.000112859	0.000102051	0.000111948	8.88066e-05	0.000109082	0.000104164	0.000104383	0.000100126	0.000113523	0.000126383	7.4229e-05	0.000105309	8.09921e-06	6.00803e-05	4.61667e-05	4.81351e-05
Bifidobacterium dentium	0.000126845	0.000123584	0.000109902	0.000114664	0.00013703	0.000114975	0.000123986	0.000141356	0.00013574	0.000127955	0.000119445	0.00014635	0.000131046	0.000141843	0.000116762	0.00012972	1.73854e-05	0.000114791	8.6187e-05	8.37908e-05
Aerococcus urinaehominis	0.000126488	0.000144413	0.000130464	0.000125197	0.000105903	0.000148377	0.000143095	0.000134807	0.000113372	0.000117667	0.000113547	0.00012476	0.000134028	0.000122631	0.000145072	0.000121524	2.87662e-05	5.24893e-05	4.90351e-05	8.6847e-05
Neochlamydia sp. S13	0.000126488	0.000100256	4.8215e-05	2.98747e-05	7.68621e-05	6.61316e-05	6.1993e-05	6.21327e-05	2.8343e-05	2.97919e-05	2.47528e-05	2.59372e-05	3.42993e-05	4.00764e-05	2.66845e-05	3.9023e-05	9.84473e-06	2.63835e-05	2.10345e-05	3.10714e-05
Agrobacterium tumefaciens	0.000125952	0.000170796	0.000138547	0.000172513	0.000135465	0.000188156	0.000152424	0.000203329	0.000161479	0.000216259	0.000165581	0.000206049	0.000177648	0.000170062	0.000212122	0.000201886	1.88516e-05	5.70254e-05	3.30543e-05	4.55883e-05
Campylobacter jejuni	0.000125773	0.00014969	0.000108484	8.85879e-05	0.000103294	9.73512e-05	0.000166719	0.000107654	0.00011184	0.000109094	0.000168214	0.000158811	0.000142044	0.000141393	0.000160513	0.000154488	1.50813e-05	4.96195e-05	3.763e-05	3.90939e-05
Syntrophobacter fumaroxidans	0.000125773	0.000131916	0.000122097	0.00013245	0.000130422	0.000129578	0.000124437	0.000134807	0.000102495	0.000103736	0.000101539	0.000100996	8.89172e-05	0.000100116	8.33045e-05	9.63992e-05	2.47166e-05	5.60071e-05	5.12205e-05	6.01052e-05
Methylophaga nitratireducenticrescens	0.000125594	0.000145802	0.000122948	0.000105857	0.000183982	0.000203766	9.35913e-05	9.23205e-05	0.000128386	6.12984e-05	7.97357e-05	7.92608e-05	0.000117811	0.000143795	0.000172027	0.000155735	6.28387e-06	3.61963e-05	2.92981e-05	3.08167e-05
Paenibacillus sp. FSL R5-0345	0.000125237	0.000117752	9.17504e-05	0.000129342	0.000133204	0.000102051	0.000106381	0.000125703	0.000153512	0.000157961	0.000130716	0.000179967	0.000120607	0.000114675	0.000118794	8.67771e-05	9.98438e-06	4.41576e-05	2.7181e-05	3.70564e-05
Salegentibacter sp. T436	0.000125237	0.000107199	9.38775e-05	5.83679e-05	4.03439e-05	5.11933e-05	7.14725e-05	6.78827e-05	6.22015e-05	2.67913e-05	3.01247e-05	6.25972e-05	4.06372e-05	3.97762e-05	3.80627e-05	3.68847e-05	7.0519e-06	7.59104e-06	7.58063e-06	1.20975e-05
Candidatus Methanomethylophilus alvus	0.000125058	0.000129416	0.000131031	0.000140048	0.0001772	0.000176071	0.00015092	0.000122029	0.000153206	0.000141672	0.000142408	0.00011708	0.000180444	0.000213591	0.000147645	0.000217745	2.56242e-05	5.85991e-05	5.57962e-05	7.44948e-05
Lactobacillus acidipiscis	0.000125058	0.000110531	0.000100543	0.000107238	0.000112685	0.000107254	9.17857e-05	9.69525e-05	8.77868e-05	0.000107165	8.70035e-05	9.18671e-05	7.84782e-05	8.25543e-05	8.89935e-05	8.39261e-05	1.66174e-05	6.95228e-05	5.42254e-05	5.71764e-05
Paenibacillus kribbensis	0.00012488	0.000200234	0.000161804	0.000200661	0.000214066	0.000193695	0.000219082	0.000200454	0.00021219	0.000223546	0.000229306	0.000234594	0.000183427	0.000198881	0.000213612	0.000207766	1.91309e-05	0.000104701	7.1777e-05	8.1626e-05
Aerococcus urinae	0.000124701	0.000124695	0.000124934	0.000122089	0.00012677	0.000146698	0.000151672	0.000119154	0.000106784	0.000127098	0.000121341	0.000115196	0.000136079	0.000140342	0.000116762	0.000122414	3.78429e-05	7.01708e-05	7.00013e-05	9.58882e-05
Pedobacter sp. eg	0.000124344	0.000117752	7.31734e-05	8.73791e-05	7.56448e-05	8.30842e-05	8.95287e-05	0.000111967	7.82881e-05	7.11576e-05	6.87812e-05	8.65058e-05	4.62295e-05	6.079e-05	4.25327e-05	5.13179e-05	3.81222e-05	4.02695e-05	4.84204e-05	4.1004e-05
Sporosarcina ureae	0.000123986	0.000135804	0.000121672	0.000126752	0.000145899	0.000141327	0.000140838	0.00011548	0.00012425	0.000142744	0.000139037	0.000133164	0.000189764	0.000191376	0.000186927	0.00020242	2.85567e-05	6.14689e-05	5.88011e-05	5.83225e-05
Flavobacterium columnare	0.000123629	9.10912e-05	6.99118e-05	5.37054e-05	4.88648e-05	6.86494e-05	6.69584e-05	9.16816e-05	6.18951e-05	3.57931e-05	2.98087e-05	6.78136e-05	2.81478e-05	2.86689e-05	4.13136e-05	2.36989e-05	2.30409e-05	2.17548e-05	2.28102e-05	2.20301e-05
Aerococcus christensenii	0.00012345	0.000128305	0.0001333	0.00015559	0.000143812	0.000105911	0.000131208	0.000109092	0.000123177	0.000129884	0.000144725	0.000123456	0.000208965	0.00018162	0.00018923	0.000211686	4.98521e-05	0.000112107	0.000105856	0.000126705
Bacillus pseudofirmus	0.00012345	0.000128583	0.000138689	9.7913e-05	0.000127988	0.000108597	0.000126995	0.000124585	0.000104793	0.000181323	0.000132191	0.000118819	0.000213998	0.000157304	0.000211986	0.000191195	4.13339e-05	7.1004e-05	8.12015e-05	0.000103783
Isosphaera pallida	0.000123093	0.00011553	0.000111745	0.000110519	0.000109728	0.000110947	0.000114807	9.99873e-05	0.000102341	0.000120668	0.000103119	0.000103024	0.000107931	0.00010702	0.00011026	0.000104418	2.48562e-05	5.35076e-05	4.69862e-05	5.78131e-05
Bacillus oceanisediminis	0.000122914	8.66478e-05	8.65034e-05	0.000108965	0.000121206	0.000104904	0.000102469	0.00012155	0.000113219	0.000111666	0.000117866	0.000110559	0.000130859	0.000146947	0.000123941	0.000123662	1.16601e-05	5.60996e-05	4.41862e-05	4.67344e-05
Pelobacter acetylenicus	0.000122379	0.000130805	0.000150743	0.000116218	9.73818e-05	9.21479e-05	8.68203e-05	6.948e-05	9.0851e-05	7.50156e-05	7.43638e-05	7.5928e-05	5.85325e-05	6.16906e-05	5.58072e-05	7.41258e-05	1.19394e-05	3.28636e-05	3.4625e-05	3.47643e-05
Bacillus filamentosus	0.000121843	0.000146079	0.000133726	0.000162498	0.000171288	0.000161133	0.000163108	0.000173301	0.000146311	0.00018068	0.000163263	0.000147799	0.000225928	0.000194078	0.000215779	0.000192264	2.03179e-05	7.83173e-05	6.25573e-05	8.03526e-05
Bacillus beveridgei	0.000121307	0.000125806	0.000125926	0.000121398	0.000121032	0.000112625	0.000102619	0.000103661	0.000109082	0.000145102	0.000114074	0.000103314	0.00014223	0.000146947	0.00013857	0.000150212	3.29554e-05	6.69307e-05	7.62161e-05	9.49968e-05
Zunongwangia profunda	0.000121307	0.000116364	8.05475e-05	7.54638e-05	5.6864e-05	9.08051e-05	9.14848e-05	7.53898e-05	5.07111e-05	3.06492e-05	4.95056e-05	5.23092e-05	5.55499e-05	4.57801e-05	4.36163e-05	4.25867e-05	4.6361e-05	5.63773e-05	5.64791e-05	5.6285e-05
Chondromyces crocatus	0.000121128	0.000123862	0.000142802	0.000126752	0.000153029	0.000126892	0.000125942	0.000112925	0.000107857	0.00013117	0.000118708	0.000110704	0.000141485	0.000137941	0.000138028	0.000143797	1.71061e-05	0.000121919	8.88505e-05	9.05399e-05
Desulfobulbus oralis	0.000121128	0.000139414	0.000128337	0.000128651	0.000147812	0.000124374	0.000121428	0.000106696	0.000131757	0.000140172	0.000143356	0.000118674	0.000137384	0.00013734	0.000158346	0.00014148	2.25521e-05	6.21169e-05	6.2489e-05	7.18207e-05
Kyrpidia tusciae	0.000120949	0.000108865	9.51538e-05	0.00012537	0.000127292	0.000134277	9.79549e-05	0.000140557	0.000130531	0.000123026	0.000112915	0.000110125	5.98373e-05	6.88954e-05	8.18145e-05	5.30997e-05	9.35599e-06	3.68443e-05	2.97079e-05	4.29141e-05
Corallococcus coralloides	0.000120592	0.000130249	0.000127912	0.000118117	0.000138595	0.000151734	0.000129553	0.000158606	0.000151367	0.000131384	0.000155363	0.00015287	0.000103457	9.09599e-05	0.000124889	0.000108872	1.29867e-05	4.86937e-05	4.90351e-05	5.74311e-05
Stenotrophomonas maltophilia	0.000120413	0.000141636	0.000120963	0.000124507	0.000122075	0.000141663	9.46446e-05	0.000124265	0.000111227	0.000141458	0.000113863	0.000113312	0.000120793	0.000125032	0.000109447	0.000111901	1.14506e-05	5.12858e-05	4.14544e-05	4.16407e-05
Geoalkalibacter subterraneus	0.000120056	0.000138581	0.00010976	0.00012727	0.000107642	0.000128571	0.000140838	0.00013864	0.0001362	0.000108022	0.000136298	0.000125919	0.000134774	0.000116026	0.000126785	0.000109407	3.80523e-05	8.72969e-05	7.15038e-05	0.000103656
Desulfovibrio desulfuricans	0.000119877	0.000111087	0.000119119	0.000111901	0.000100164	0.000112457	0.000106532	9.43969e-05	0.000102188	0.00011038	8.44756e-05	0.000113892	9.37638e-05	9.75642e-05	0.000130714	0.000109407	1.15204e-05	5.62848e-05	4.94448e-05	4.26594e-05
Flavobacterium crocinum	0.000119877	0.000108032	6.96282e-05	6.23397e-05	5.99941e-05	8.30842e-05	7.77922e-05	8.76885e-05	4.97918e-05	3.66505e-05	4.08685e-05	4.56438e-05	1.80817e-05	2.83687e-05	2.49236e-05	1.9066e-05	5.36922e-05	4.63794e-05	5.07424e-05	5.01726e-05
Capnocytophaga sp. oral taxon 878	0.000119341	8.88695e-05	7.55841e-05	4.97336e-05	5.32122e-05	8.52662e-05	8.11025e-05	9.10427e-05	4.9945e-05	3.36498e-05	3.39166e-05	5.27439e-05	1.75225e-05	2.01132e-05	2.81745e-05	2.29861e-05	6.42351e-06	2.81424e-05	2.34931e-05	2.72511e-05
Paenibacillus sp. FSL P4-0081	0.000118627	0.000139692	0.000123941	0.000137803	0.000121901	0.000140152	0.00014445	0.000137842	0.000137732	0.000135885	0.000158523	0.000143307	0.000131791	0.000163308	0.000154553	0.00013756	3.33743e-05	6.31352e-05	6.68598e-05	8.55736e-05
Candidatus Promineofilum breve	0.000118269	0.000125806	0.000113305	0.000108274	0.000159984	0.000147034	0.000127296	0.000139279	0.000149376	0.000132027	0.000139985	0.000129686	0.000114082	0.000143645	0.000107415	0.000128829	4.10546e-05	7.70213e-05	6.50841e-05	7.13113e-05
Enterococcus durans	0.000118269	9.38684e-05	9.643e-05	0.000103612	9.02521e-05	9.78547e-05	9.73531e-05	0.000112925	0.000109082	0.000123454	0.000110282	9.7953e-05	8.64938e-05	8.28545e-05	0.000112834	8.21442e-05	2.27616e-05	4.53611e-05	4.71228e-05	6.45622e-05
Streptococcus salivarius	0.000117912	0.000100811	8.9765e-05	0.000111728	7.54709e-05	8.92945e-05	0.00010608	6.948e-05	6.71041e-05	0.000111452	6.97292e-05	8.44772e-05	0.000102711	0.000120229	9.79335e-05	9.39045e-05	7.12172e-06	4.87863e-05	4.48691e-05	4.20227e-05
Bacteriovorax stolpii	0.000117734	4.77674e-05	5.47382e-05	4.24808e-05	4.99082e-05	6.17676e-05	6.77108e-05	4.24866e-05	4.13655e-05	5.35825e-05	5.25602e-05	4.91214e-05	6.43112e-05	5.82383e-05	4.65963e-05	5.09615e-05	1.37547e-05	2.59206e-05	2.84103e-05	4.30415e-05
Brevibacillus sp. SCSIO 07484	0.000117734	0.000124417	0.00013174	0.000151618	0.000138073	0.000135788	0.00013482	0.000111328	0.0001434	0.00015046	0.000134403	0.000132439	0.000159753	0.000110773	0.000139518	0.000122414	2.84869e-05	7.21149e-05	7.89478e-05	0.0001169
Paenibacillus borealis	0.000117198	0.000146079	0.000146347	0.000159044	0.00014016	0.00012941	0.000142343	0.000132731	0.000155351	0.000166963	0.000142513	0.000158666	0.000178207	0.000208187	0.000156314	0.000196718	1.89214e-05	5.48962e-05	5.92792e-05	5.79404e-05
Geobacter lovleyi	0.000117019	0.000144691	0.000115149	0.000133486	0.000159115	0.000137634	0.000136776	0.000124904	0.000113066	0.000156247	0.000141565	0.000111284	0.000182308	0.000188974	0.000191533	0.000189947	1.87818e-05	7.0356e-05	4.98546e-05	5.17007e-05
Thermoactinomycetaceae bacterium SCSIO 07575	0.000117019	0.000133027	0.00016308	0.000157662	0.000195981	0.000178925	0.000167923	0.000146467	0.000147077	0.000146602	0.000142197	0.000120847	0.00017336	0.000179068	0.000175007	0.000172841	3.47708e-05	8.9889e-05	9.17188e-05	0.000116008
Echinicola vietnamensis	0.000116662	0.000108865	9.41611e-05	7.85721e-05	6.24287e-05	8.40913e-05	8.08015e-05	0.000101425	7.27727e-05	5.57258e-05	4.87683e-05	7.54933e-05	5.38722e-05	4.2478e-05	4.03654e-05	4.68632e-05	1.0892e-05	1.61078e-05	1.42734e-05	1.64271e-05
Lutibacter sp. LPB0138	0.000116126	0.000101089	8.96232e-05	6.47573e-05	6.62544e-05	0.000103897	9.49456e-05	0.000112925	6.52656e-05	5.72262e-05	4.7083e-05	6.5785e-05	2.98255e-05	4.21778e-05	2.80391e-05	3.22518e-05	9.70509e-06	2.65686e-05	1.70735e-05	1.66818e-05
Erysipelothrix rhusiopathiae	0.000115947	8.27597e-05	0.000128053	0.000112246	0.000136161	0.000153748	0.000137829	0.000122828	0.000116896	0.00012174	9.67993e-05	9.88224e-05	0.000131605	0.000142594	0.000140737	0.000134709	6.56316e-05	9.40548e-05	0.000106061	0.000136001
Nonomuraea sp. ATCC 55076	0.000115768	0.000158854	0.000155423	0.000153	0.000168679	0.000160965	0.00015107	0.000170585	0.000167454	0.000154961	0.000175903	0.000174171	0.000142976	0.000141693	0.000152522	0.000166783	1.53606e-05	9.54434e-05	6.63817e-05	8.30267e-05
Paenibacillus sp. FSL R5-0912	0.000115768	0.00015691	9.95498e-05	0.000152136	0.000138073	0.000138809	0.000139334	0.000143911	0.000138345	0.000170607	0.000165791	0.000150117	0.000112778	0.00010702	0.000128682	9.9072e-05	2.70207e-05	6.73936e-05	4.90351e-05	6.86371e-05
Lactobacillus murinus	0.000115411	0.000111365	9.35939e-05	0.000122434	0.000109902	0.000105072	0.000127748	0.000113883	8.62548e-05	0.000116381	0.000116812	0.000106502	0.000141485	0.000138841	0.000191262	0.000162863	1.17997e-05	5.07304e-05	4.08398e-05	4.76258e-05
Methanobrevibacter ruminantium	0.000115411	0.000152744	0.000125075	0.000150064	0.000116163	0.00013562	0.000119622	0.000122988	0.00013237	0.000120239	0.000128083	0.000128672	0.00014018	0.000163908	0.000131662	0.000140055	1.31263e-05	4.32319e-05	3.50348e-05	3.68017e-05
Mobiluncus curtisii	0.000115411	0.000141358	0.000141809	0.000168369	0.000201024	0.000158951	0.000149114	0.000153655	0.000170978	0.000154318	0.000167792	0.00017475	0.000240841	0.000245412	0.000249913	0.000222021	1.01938e-05	8.97039e-05	6.5289e-05	7.48769e-05
Streptosporangium roseum	0.000115232	0.000129972	0.000129897	0.000110001	0.000148507	0.000133103	0.000116763	0.000122189	0.000142634	0.000126883	0.00013514	0.000136062	0.00011371	0.000104018	0.000114053	0.000126691	1.27074e-05	4.26764e-05	4.00886e-05	3.6165e-05
Catenovulum sp. CCB-QB4	0.000114875	0.0001022	8.80633e-05	0.000114664	9.65123e-05	8.67768e-05	8.29081e-05	8.60913e-05	0.000105099	0.000106522	9.33234e-05	9.08528e-05	6.24471e-05	6.31916e-05	7.00299e-05	5.57725e-05	6.42351e-06	3.62889e-05	2.67712e-05	3.11987e-05
Flavobacterium gilvum	0.000114875	0.000103866	0.00011841	7.77087e-05	8.31223e-05	0.000126221	0.000117666	0.000128897	5.22431e-05	4.13657e-05	4.19218e-05	5.34684e-05	3.93323e-05	4.35287e-05	4.1449e-05	4.3834e-05	0.000143761	0.000111736	0.000123271	0.000126196
Tumebacillus avium	0.000114875	0.000128583	0.000116425	0.000142121	0.000133378	0.000128739	0.000149114	0.000141516	0.00015964	0.000139529	0.000142724	0.000155044	0.00011837	0.000135539	0.000134777	0.000127226	1.43133e-05	6.68382e-05	4.49374e-05	5.6667e-05
Algoriphagus sp. M8-2	0.000114696	9.30353e-05	9.47283e-05	8.15078e-05	5.77335e-05	6.84815e-05	7.64379e-05	8.76885e-05	6.67977e-05	5.89408e-05	6.24614e-05	6.54952e-05	2.18099e-05	3.52732e-05	1.82863e-05	3.20737e-05	1.08222e-05	3.06419e-05	2.12394e-05	2.29215e-05
Maribacter cobaltidurans	0.000114696	0.000103589	0.000111036	0.000106202	4.97343e-05	8.39234e-05	8.59175e-05	9.15219e-05	7.47644e-05	7.20149e-05	6.81492e-05	8.6216e-05	4.49246e-05	2.95695e-05	2.31627e-05	3.51028e-05	1.4802e-05	1.76816e-05	2.45175e-05	2.4959e-05
methanogenic archaeon ISO4-H5	0.000114518	0.000128305	0.000140107	0.000135731	0.000158941	0.000156433	0.000152274	0.0001503	0.000120573	0.000131384	0.000117234	0.000116645	0.000141671	0.000138241	0.000156992	0.000140233	4.25907e-05	8.12797e-05	7.09574e-05	0.000101746
Zobellia galactanivorans	0.000114518	9.27576e-05	8.36672e-05	7.49457e-05	5.12993e-05	8.4427e-05	7.98987e-05	9.87095e-05	5.99034e-05	5.44399e-05	5.10856e-05	6.41911e-05	5.14489e-05	5.34352e-05	7.13845e-05	5.07833e-05	7.09379e-05	5.71179e-05	6.05085e-05	7.36034e-05
Acetomicrobium mobile	0.000114339	0.00010831	0.00013954	0.000126924	0.000150594	0.000150726	0.000147008	9.61539e-05	8.30375e-05	9.40909e-05	9.16381e-05	9.11426e-05	0.000102898	0.000127134	0.000102268	0.000135422	2.29012e-05	8.03539e-05	6.25573e-05	8.21353e-05
Opitutus terrae	0.000113803	0.000120807	0.000112171	0.000105338	0.000101555	9.71833e-05	9.90082e-05	0.000101265	0.000100656	8.05881e-05	8.64768e-05	9.65039e-05	9.97289e-05	0.000114375	0.000108364	0.000101032	2.73698e-05	4.70274e-05	5.21766e-05	5.81951e-05
Candidatus Desulforudis audaxviator	0.000113446	0.000120529	0.00012153	0.000131414	0.00016068	0.000140488	0.000133014	0.000150939	0.000132216	0.000148531	0.000137246	0.000125049	0.00015472	0.000158654	0.000149677	0.000141124	2.21332e-05	6.98005e-05	5.65474e-05	7.06746e-05
Bacillus halodurans	0.000113267	0.000109421	0.000118694	0.00012088	0.000120858	0.0001232	0.000135722	0.000108772	0.000118888	0.000129241	0.000108386	0.000117949	0.000176716	0.000178768	0.000133423	0.00017195	2.86964e-05	6.1006e-05	6.22158e-05	7.92065e-05
Conexibacter woesei	0.000113088	0.000138025	0.000143794	0.000135386	0.000153376	0.000146362	0.000134669	0.000154293	0.000155044	0.000154961	0.000150623	0.000145191	0.000128995	0.000113024	0.000121232	0.000136135	1.47322e-05	4.60091e-05	4.7396e-05	5.69217e-05
Pseudopropionibacterium propionicum	0.000113088	0.000106088	8.35254e-05	0.00011639	0.000117728	8.91267e-05	0.000110895	0.000105737	0.000112913	0.000124097	0.000124607	0.000103894	9.71192e-05	0.000108371	9.90172e-05	8.25006e-05	7.88975e-06	5.96174e-05	4.22057e-05	4.80078e-05
Thermodesulfovibrio yellowstonii	0.000113088	0.000134415	0.000123657	0.000114145	0.000149898	0.000154923	0.000136174	0.000114842	0.000107091	0.000158604	0.000114074	8.7665e-05	0.000109981	9.80145e-05	0.000117981	0.000132749	2.86265e-05	7.07263e-05	6.4811e-05	8.62103e-05
Phascolarctobacterium faecium	0.000112553	9.7201e-05	0.000109193	0.000105511	0.000101381	8.6609e-05	0.000105177	9.27997e-05	9.0851e-05	0.000105236	0.000101329	9.41855e-05	0.000188832	0.000190025	0.000239619	0.000171238	2.33201e-05	4.35096e-05	4.04983e-05	5.53936e-05
Desulfocapsa sulfexigens	0.000112017	0.000120252	9.79899e-05	0.000102748	9.40778e-05	0.00010994	0.000116914	9.12024e-05	8.22714e-05	9.70916e-05	9.85899e-05	9.82428e-05	0.000131791	0.000138841	0.000137351	0.000132215	1.33358e-05	6.7301e-05	5.23815e-05	5.24647e-05
Flavobacterium faecale	0.000111838	8.16489e-05	9.28848e-05	6.89017e-05	5.07777e-05	7.06635e-05	7.1623e-05	7.01189e-05	4.397e-05	2.95776e-05	3.40219e-05	3.81089e-05	7.40044e-05	7.2948e-05	7.47708e-05	7.7155e-05	9.70509e-06	2.24028e-05	1.65271e-05	1.82098e-05
Pseudomonas stutzeri	0.000111838	0.000116364	0.000129613	0.000139876	0.000154246	0.000119339	0.000123234	0.000119793	0.000120266	0.000129455	0.000131137	0.000126354	0.000148754	0.000130286	0.000141414	0.000155914	2.17841e-05	6.99857e-05	4.88302e-05	5.71764e-05
Pseudomonas putida	0.000111659	0.000151911	0.000113731	0.000104648	0.00012051	0.000108765	0.000105478	0.000125543	0.000121339	0.000120882	0.000131664	0.000111429	0.000147263	0.000155953	0.000155095	0.000143084	1.62682e-05	6.01729e-05	5.51815e-05	5.84498e-05
Methylocaldum marinum	0.000111481	0.000110254	8.33836e-05	7.18374e-05	7.98183e-05	7.8888e-05	8.39614e-05	8.59315e-05	9.82048e-05	0.000102235	0.000100697	0.000101141	3.76546e-05	5.29849e-05	4.90345e-05	4.52595e-05	1.26376e-05	2.66612e-05	2.9503e-05	3.45096e-05
Pontibacter actiniarum	0.000111302	8.74809e-05	8.59362e-05	6.8729e-05	8.05139e-05	9.93653e-05	8.41118e-05	0.000103182	4.9179e-05	5.70118e-05	5.26656e-05	6.10032e-05	5.55499e-05	3.58736e-05	4.172e-05	5.00705e-05	1.79439e-05	4.68423e-05	4.24106e-05	3.37455e-05
Tenericutes bacterium MZ-XQ	0.000110766	0.000104977	0.0001991	0.000121571	0.000141725	0.000231125	0.000184474	0.000130495	9.95837e-05	0.000145745	0.000115443	9.65039e-05	0.000149314	0.000169011	0.000174601	0.000165536	0.00012065	0.000132658	0.000179408	0.000268945
Bdellovibrio bacteriovorus	0.000110587	0.000119141	0.000105931	0.000108965	0.000117554	0.000111115	9.81054e-05	9.79108e-05	0.000102188	7.97308e-05	8.86888e-05	9.04181e-05	0.000112778	0.000104469	0.000120284	0.000105309	1.61286e-05	3.86032e-05	2.97079e-05	4.5843e-05
Streptococcus pneumoniae	0.000110587	0.000137192	0.000122807	0.000166124	9.66862e-05	0.000119843	0.000120525	9.04038e-05	0.000103261	0.000125169	0.000101329	9.80979e-05	0.000158634	0.000166159	0.000153741	0.000157517	1.04731e-05	5.30447e-05	3.77666e-05	5.50116e-05
Desulfurivibrio alkaliphilus	0.00011023	0.000127472	9.47283e-05	0.000105511	0.00012677	0.000108765	0.000117365	0.00012746	0.000100963	0.000160748	0.000146726	0.000123166	0.000157889	0.000156403	0.000140873	0.000149143	1.13808e-05	5.7766e-05	4.2274e-05	5.24647e-05
Methanococcus maripaludis	0.000109515	0.000138303	0.000148474	0.000165951	0.000161549	0.000167511	0.000163559	0.000152856	0.000147231	0.000149602	0.00013356	0.000150987	0.000104948	0.000107771	0.000121503	0.00011101	3.9728e-05	7.26703e-05	7.23916e-05	9.56335e-05
Geobacter uraniireducens	0.000109158	9.22021e-05	0.000110469	8.56523e-05	0.000136335	0.000109772	0.000123384	0.000119953	9.69792e-05	0.00011831	0.000102171	0.00010969	0.000136638	0.000132837	0.000145072	0.000145757	1.37547e-05	5.10081e-05	4.15227e-05	3.79478e-05
Fimbriimonas ginsengisoli	0.000108622	0.000140247	0.000116141	0.000135904	0.000136335	0.000140488	0.000130155	0.000135925	0.000142328	0.000147673	0.000123659	0.00012476	0.000121912	0.000125783	0.000138976	0.000112258	2.19936e-05	6.28575e-05	5.01278e-05	7.08019e-05
Prochlorococcus marinus	0.000108622	9.30353e-05	9.5012e-05	8.44435e-05	0.000108685	9.50013e-05	0.000114506	9.99873e-05	7.39983e-05	9.64486e-05	8.1105e-05	6.27421e-05	9.56279e-05	9.86149e-05	7.97826e-05	9.87156e-05	2.03877e-05	4.79531e-05	3.70836e-05	5.0682e-05
Spirosoma montaniterrae	0.000108622	0.000111365	7.92712e-05	8.99694e-05	8.13834e-05	9.48335e-05	0.000106833	0.000118356	9.20766e-05	7.41582e-05	6.87812e-05	9.24467e-05	3.35536e-05	3.73746e-05	2.47882e-05	3.8132e-05	2.94644e-05	3.69369e-05	3.98154e-05	4.01126e-05
Methanosarcina siciliae	0.000108443	0.000139969	0.000102244	0.000124507	0.000174939	0.00012471	0.000113905	0.000217384	0.000258918	0.00035343	0.000223407	0.000243144	0.000101407	9.27611e-05	0.000117574	9.56864e-05	4.95728e-06	4.712e-05	2.97079e-05	4.49516e-05
Glaciecola sp. THG-3.7	0.000108265	0.000102478	9.40193e-05	7.46004e-05	9.18171e-05	0.000109772	0.000100814	0.000131932	8.96253e-05	6.12984e-05	5.70895e-05	8.52017e-05	3.22488e-05	3.75247e-05	3.725e-05	4.82887e-05	2.54846e-05	3.60111e-05	3.96788e-05	3.80751e-05
Thermogutta terrifontis	0.000108086	0.000105255	0.000112171	9.87764e-05	0.000116336	0.000101379	9.11838e-05	7.34731e-05	9.20766e-05	9.43053e-05	8.47915e-05	8.15792e-05	7.64277e-05	8.10534e-05	6.00063e-05	8.12533e-05	1.19394e-05	4.92492e-05	4.58253e-05	5.20827e-05
Solibacillus silvestris	0.000107907	0.000111087	8.76379e-05	0.000109656	0.000101729	8.97981e-05	0.000104726	0.000106855	0.000106784	0.000114667	0.000107543	0.000110125	0.000134028	0.000149799	0.000149948	0.000128295	2.08764e-05	4.63794e-05	4.02934e-05	4.91539e-05
Candidatus Kuenenia stuttgartiensis	0.000107193	0.000113586	9.54374e-05	8.49615e-05	0.000101555	9.16444e-05	9.37418e-05	9.67928e-05	8.1965e-05	8.50891e-05	8.15263e-05	8.1869e-05	0.000111659	0.000100266	0.000106738	0.000103883	4.03564e-05	6.87822e-05	6.49476e-05	8.239e-05
Neisseriaceae bacterium DSM 100970	0.000107014	0.000129416	0.000123657	0.000149891	0.000125379	0.000116486	9.85568e-05	0.00017969	0.000199933	0.000221617	0.000164106	0.000166201	6.20742e-05	5.94391e-05	6.35281e-05	6.07618e-05	1.71061e-05	2.64761e-05	2.7181e-05	4.02399e-05
Carnobacterium sp. CP1	0.000106836	0.000108032	0.000108342	0.000113282	0.000119988	0.000110611	0.000107133	0.000114203	9.1617e-05	0.000106522	0.000107859	0.000105053	0.0001687	0.000157904	0.000142498	0.000178009	2.40882e-05	6.05432e-05	5.93475e-05	7.52589e-05
Exiguobacterium sp. AT1b	0.000106657	9.58124e-05	0.000123374	0.000103612	0.000114598	0.000136292	0.000123234	0.000116758	0.000106018	0.000114881	0.000101329	0.000103169	0.000139061	0.00012203	0.000124889	0.000116891	5.04804e-05	6.38758e-05	8.54358e-05	0.000131289
Listeria grayi	0.000106657	0.000103311	0.000121814	0.000110174	8.06878e-05	0.000104065	9.7654e-05	8.32162e-05	6.86361e-05	6.79427e-05	6.00387e-05	5.9844e-05	9.35774e-05	0.00010582	7.96472e-05	9.69337e-05	3.33743e-05	5.69328e-05	6.00304e-05	8.04799e-05
Bifidobacterium pseudocatenulatum	0.000106478	0.000120252	0.000122381	0.000130896	0.000114945	9.73512e-05	0.000167772	7.07578e-05	0.000119347	0.000127955	9.10061e-05	8.08547e-05	0.000148941	0.000231452	0.000184353	0.000260688	4.95728e-06	4.11953e-05	7.47819e-05	5.1446e-05
Euzebya sp. DY32-46	0.0001063	0.000126361	0.00013642	0.000111901	0.00013077	0.000132095	0.000127898	0.000109251	0.000136966	0.000111023	0.000105542	0.000116645	0.000114455	0.000115276	8.66908e-05	0.000116712	2.28314e-05	3.453e-05	4.17276e-05	5.00453e-05
Verrucomicrobia bacterium IMCC26134	0.0001063	9.69233e-05	9.28848e-05	8.3062e-05	8.55569e-05	7.46918e-05	7.50837e-05	7.55495e-05	6.37336e-05	7.0086e-05	6.59373e-05	5.99889e-05	7.3818e-05	8.76577e-05	7.40936e-05	7.98278e-05	1.15903e-05	3.54557e-05	2.74542e-05	3.79478e-05
Actinoplanes friuliensis	0.000106121	0.000114142	9.99753e-05	9.20417e-05	0.000115119	0.000146195	0.000135271	0.000140397	0.000129459	0.00013117	0.000119656	0.000132005	0.000102152	0.000102367	0.000102945	0.00011404	1.12412e-05	4.80457e-05	3.94056e-05	4.68617e-05
Aerococcus viridans	0.000105942	0.000113864	0.000112738	0.000152654	0.000154768	0.000143677	0.000134218	0.000108453	0.000143094	0.00012474	0.000121341	0.000115486	0.000159939	0.00013704	0.000171485	0.000147004	1.66872e-05	6.57273e-05	4.95131e-05	6.57083e-05
Lactobacillus paracollinoides	0.000105942	0.000112198	0.000109193	9.54954e-05	0.000105729	0.000115311	0.0001124	0.000126022	0.000105559	0.000114238	0.000121131	0.000106937	0.000106253	0.000118728	0.000120284	0.000120454	2.52053e-05	5.85065e-05	5.88011e-05	8.2008e-05
Desulfococcus multivorans	0.000105764	0.000122473	0.000112171	0.000112246	0.000100338	9.9701e-05	0.000111948	0.000103022	9.29958e-05	9.32336e-05	9.92219e-05	9.18671e-05	0.000153974	0.000153101	0.000158617	0.000141837	1.41736e-05	5.76734e-05	4.36398e-05	5.19554e-05
Hymenobacter sedentarius	0.000105764	9.83119e-05	0.00012621	7.54638e-05	8.29484e-05	9.55048e-05	0.000103372	0.000100466	6.4806e-05	6.27987e-05	5.49828e-05	6.49156e-05	4.56702e-05	3.69243e-05	4.60545e-05	4.0983e-05	1.24979e-05	3.32339e-05	2.33565e-05	2.68691e-05
Streptococcus pasteurianus	0.000105406	0.000100256	0.000119261	0.000104302	7.98183e-05	6.99921e-05	8.3209e-05	6.96397e-05	7.0781e-05	0.000106308	8.48969e-05	7.24504e-05	0.000165718	0.000133888	0.000233117	0.000140233	6.84244e-06	3.10122e-05	2.52005e-05	3.70564e-05
Calothrix sp. NIES-4071	0.000104692	0.000122196	0.000100968	0.000101712	0.000114424	0.000116654	0.000117817	0.000103501	0.000113372	0.000136957	0.0001146	0.000111863	8.96628e-05	9.21607e-05	9.8069e-05	9.67555e-05	4.85953e-05	6.04506e-05	6.42646e-05	7.41128e-05
Azospirillum lipoferum	0.000104513	9.94228e-05	0.000107491	9.1869e-05	0.000133726	0.000114304	0.000131509	0.000131932	0.00014769	9.06617e-05	0.000121973	0.000134758	0.000107931	8.22541e-05	0.000101455	0.000102101	1.55002e-05	4.38799e-05	4.68497e-05	5.02999e-05
Flavobacteriaceae bacterium UJ101	0.000104513	0.0001022	9.65719e-05	7.83995e-05	7.51231e-05	9.76869e-05	8.5767e-05	0.000114522	6.44996e-05	5.42255e-05	5.14016e-05	7.14361e-05	4.54838e-05	3.36221e-05	4.11781e-05	3.01136e-05	3.47009e-05	4.69348e-05	4.40496e-05	4.83898e-05
Thermobaculum terrenum	0.000104513	0.000116641	0.000130606	0.000112419	0.000154941	0.000130585	0.000144299	0.000114842	9.88177e-05	0.000114452	0.000111124	9.04181e-05	0.00015677	0.000156253	0.000150354	0.000151459	4.62214e-05	7.23e-05	7.34843e-05	9.77984e-05
Catenulispora acidiphila	0.000104156	0.000120807	0.000132308	0.000126579	0.000119119	0.000118668	0.00012218	0.000108932	0.000119347	0.000118953	0.00011281	0.000113457	0.000115387	0.000110623	0.000115407	0.000108872	1.35452e-05	4.61017e-05	3.39421e-05	5.09366e-05
Pelobacter propionicus	0.000104156	0.000120252	0.00011997	0.000136767	0.000172331	0.000147202	0.000149114	0.000124425	0.000138651	0.000116596	0.000119551	0.000113312	9.20861e-05	0.000112274	0.000107686	8.58861e-05	2.52751e-05	6.81342e-05	6.07133e-05	6.48169e-05
Pelobacter carbinolicus	0.000103977	0.000107477	8.43763e-05	0.000108101	8.15573e-05	6.22712e-05	7.47828e-05	8.08204e-05	7.55304e-05	8.05881e-05	7.45744e-05	7.75219e-05	7.51229e-05	7.08466e-05	5.39109e-05	7.32349e-05	9.84473e-06	4.55462e-05	3.32592e-05	4.18954e-05
Planococcus maritimus	0.000103798	0.000135248	0.000131173	0.000134695	0.000102077	0.000137467	0.000142494	0.000120911	0.000102188	0.000121525	0.000129347	0.000125049	0.000130486	0.000116777	0.000135319	0.000128116	2.54148e-05	7.64658e-05	6.03036e-05	7.72964e-05
Streptococcus pluranimalium	0.000103798	0.000124973	0.000111036	0.000130033	0.000119467	0.000105408	0.000124437	0.000127939	0.00012425	0.000168678	0.000128504	0.00014664	0.000149687	0.000171113	0.00013261	0.000149677	1.29867e-05	4.79531e-05	3.48982e-05	5.1064e-05
Virgibacillus necropolis	0.000103798	9.55347e-05	0.000103662	0.000109483	9.28605e-05	0.000116654	9.43437e-05	0.000110369	0.000114598	9.73059e-05	9.36394e-05	0.000119978	9.86104e-05	0.00012158	8.45235e-05	0.000102992	2.56242e-05	4.19359e-05	4.67131e-05	6.51989e-05
Oscillatoria acuminata	0.000103084	9.16467e-05	0.000110469	9.82584e-05	0.000123118	0.000115982	0.000107434	0.000113883	8.44163e-05	0.000135457	9.2902e-05	7.89709e-05	0.000159753	0.000150249	0.000180425	0.000149499	1.18695e-05	4.39725e-05	4.06349e-05	6.30341e-05
Arthrobacter alpinus	0.000102905	0.000113586	0.000103662	9.63588e-05	0.000100686	9.34907e-05	8.95287e-05	8.43343e-05	9.33022e-05	0.00010245	8.52129e-05	0.000106937	0.000110913	9.09599e-05	0.000126785	0.000117425	1.05429e-05	4.19359e-05	4.043e-05	3.96032e-05
Bacillus glycinifermentans	0.000102905	8.35929e-05	8.39509e-05	9.58408e-05	9.00782e-05	0.000103561	9.34409e-05	0.000105098	9.57535e-05	0.000100092	9.80633e-05	8.12894e-05	9.65599e-05	9.45623e-05	0.000107144	0.000111367	2.35994e-05	4.36948e-05	4.63033e-05	6.85098e-05
Pseudomonas aeruginosa	0.000102905	0.000116086	9.71391e-05	0.000101712	0.000134248	0.000104736	0.000123835	8.78482e-05	0.00010847	0.000100092	0.000106384	0.000106937	0.000172988	0.00018222	0.000202911	0.000172485	1.63381e-05	7.8595e-05	4.73277e-05	5.33561e-05
Streptobacillus moniliformis	0.000102905	0.000123306	0.00015443	0.000175276	0.000200676	0.000203263	0.000171083	0.000140717	0.000105712	0.000110809	0.000121973	9.80979e-05	0.00010383	0.000179968	0.000130849	0.000116712	4.14736e-05	8.49826e-05	9.27432e-05	0.000116136
Streptococcus sp. Z15	0.000102727	0.00011803	0.000144645	0.000120708	0.000122597	0.000130417	0.00012218	0.000136724	0.000146771	0.000168035	0.00014325	0.000144176	0.000145399	0.000115126	0.000149	0.0001356	3.38631e-05	6.51718e-05	6.80208e-05	0.000104929
Thermanaerovibrio acidaminovorans	0.000102369	0.000114419	0.000135286	0.000108965	0.000125553	0.000151062	0.000138732	0.000133689	0.000110308	0.0001361	0.000139985	0.00010969	0.000172056	0.000145146	0.00014453	0.000175871	3.24667e-05	6.37832e-05	7.32111e-05	8.1626e-05
Variovorax paradoxus	0.000102369	9.7201e-05	8.25328e-05	8.46162e-05	7.87749e-05	9.58405e-05	8.45632e-05	9.15219e-05	8.74804e-05	0.000113595	9.4482e-05	9.53447e-05	9.26453e-05	9.47123e-05	9.53599e-05	0.000108338	1.36849e-05	3.5826e-05	3.3464e-05	4.15134e-05
Verrucomicrobia bacterium S94	0.000101833	0.000111365	0.000127203	0.000105511	0.000128683	0.000145859	0.00013798	0.000148224	0.000146311	0.000129455	0.000122395	0.000138235	0.000126945	0.000123381	0.000129224	0.00013756	2.339e-05	5.11006e-05	4.92399e-05	7.52589e-05
Coraliomargarita akajimensis	0.000101655	9.1369e-05	0.000102811	0.000108274	0.000101208	0.000100708	9.22371e-05	9.13622e-05	7.98201e-05	7.90878e-05	7.13092e-05	7.7377e-05	6.43112e-05	8.28545e-05	6.84045e-05	9.30136e-05	3.28158e-05	4.24913e-05	3.79714e-05	4.36782e-05
Streptomyces lydicus	0.000101655	0.00011553	0.000123232	0.000107238	0.000151463	0.000140488	0.000148663	0.000143272	0.000149222	0.000161819	0.000145778	0.000139539	0.000148754	0.00015235	0.000126785	0.000162863	1.42434e-05	4.25839e-05	4.92399e-05	6.08693e-05
Gemella haemolysans	0.000101476	0.000106643	9.23176e-05	9.08329e-05	9.85991e-05	9.55048e-05	8.84754e-05	8.01815e-05	8.0433e-05	0.000107379	8.41596e-05	7.92608e-05	6.80393e-05	0.000101767	6.12254e-05	8.30351e-05	1.01938e-05	3.17528e-05	3.86544e-05	4.45696e-05
Rufibacter tibetensis	0.000101476	0.000101922	8.99068e-05	8.42708e-05	7.75577e-05	9.73512e-05	8.66698e-05	9.53553e-05	8.65612e-05	4.69383e-05	6.16187e-05	7.62178e-05	4.38061e-05	4.27782e-05	3.16963e-05	4.08048e-05	2.84869e-05	3.79552e-05	3.07323e-05	3.19627e-05
Bacillus krulwichiae	0.000101297	0.000104422	0.00010352	9.53227e-05	0.000102946	0.000112122	0.000108187	9.48761e-05	8.99317e-05	0.000123669	0.00010175	9.30263e-05	0.000164599	0.000159555	0.000166609	0.000162863	1.58493e-05	4.81383e-05	4.02934e-05	5.05546e-05
Nonlabens sp. MJ115	0.000101297	8.38706e-05	7.68604e-05	5.52595e-05	3.35619e-05	6.15998e-05	6.44005e-05	7.15564e-05	5.63797e-05	3.23639e-05	3.19153e-05	6.11481e-05	8.57482e-06	7.20474e-06	1.05654e-05	7.48385e-06	3.4282e-05	2.11068e-05	2.97762e-05	3.46369e-05
Bacillus subtilis	0.000101119	0.000133027	0.000143652	0.000156108	0.000132161	0.000112457	0.000128049	0.000127939	0.000111534	0.000226547	0.000135877	0.000119253	0.000162362	0.000164208	0.000154012	0.000167139	2.33201e-05	8.5538e-05	8.14064e-05	8.26447e-05
Bifidobacterium asteroides	0.00010094	0.000114142	0.000111462	0.000105857	0.000113902	0.000107926	0.000125641	9.13622e-05	0.000103261	0.000107165	0.000117023	0.000105343	0.000142044	0.000163758	0.000103352	0.000145044	1.4802e-05	5.41556e-05	5.85962e-05	5.61576e-05
Frankia inefficax	0.000100761	0.000108032	0.000103946	8.80699e-05	0.000133378	0.00011229	0.000124738	0.000142474	0.000161326	0.000144459	0.00014778	0.000152581	0.000114269	0.000150699	0.000101455	0.000128295	9.0767e-06	4.98046e-05	4.86253e-05	4.69891e-05
Ichthyobacterium seriolicida	0.000100761	0.0001022	7.92712e-05	6.16489e-05	5.14732e-05	6.54603e-05	6.60556e-05	7.82648e-05	5.11707e-05	4.24374e-05	3.94992e-05	5.52072e-05	2.18099e-05	1.75616e-05	2.05891e-05	2.17388e-05	7.19154e-06	1.42563e-05	1.0927e-05	1.33709e-05
Candidatus Thiodictyon syntrophicum	0.000100583	0.000116641	9.5721e-05	0.000121398	0.000113206	0.000118332	0.000147008	0.000113564	0.000108776	0.000118096	0.000123237	0.000123166	0.000212134	0.00019768	0.000158888	0.000194224	1.01938e-05	7.1652e-05	4.48691e-05	7.10566e-05
Vulgatibacter incomptus	0.000100583	0.000119974	0.000105222	7.73633e-05	9.40778e-05	8.67768e-05	0.000103071	8.12995e-05	6.61848e-05	6.57994e-05	6.49893e-05	6.33217e-05	7.82918e-05	7.35484e-05	7.95117e-05	7.53731e-05	1.71061e-05	5.02675e-05	4.30935e-05	5.81951e-05
Desulfuromonas sp. DDH964	0.000100404	0.000104977	9.33103e-05	9.8431e-05	9.18171e-05	9.44978e-05	9.69016e-05	8.27371e-05	8.34971e-05	9.2162e-05	8.42649e-05	7.53484e-05	0.00011576	0.000118128	8.37108e-05	0.000120098	1.29867e-05	4.48056e-05	3.63324e-05	4.55883e-05
Hymenobacter swuensis	0.000100404	8.49815e-05	8.11147e-05	5.75045e-05	5.07777e-05	6.62995e-05	6.40995e-05	8.27371e-05	6.43464e-05	7.69445e-05	6.72013e-05	8.23037e-05	3.24352e-05	3.78249e-05	4.34809e-05	4.02703e-05	9.98438e-06	2.06439e-05	1.18832e-05	2.03747e-05
Streptococcus sp. oral taxon 431	0.000100404	0.000100256	8.63616e-05	0.000103784	8.05139e-05	8.59376e-05	9.08829e-05	7.31536e-05	7.92073e-05	0.000100092	8.21583e-05	8.59262e-05	8.1088e-05	9.39619e-05	9.17026e-05	7.94714e-05	3.49104e-06	1.64781e-05	1.37271e-05	1.37529e-05
Bacillus pseudomycoides	0.000100225	8.60923e-05	8.46599e-05	0.000103784	0.000101208	7.85523e-05	8.81745e-05	8.70496e-05	9.85112e-05	0.000148316	9.701e-05	0.000106502	9.30182e-05	9.56129e-05	0.000105384	9.37264e-05	1.05429e-05	2.60132e-05	2.55419e-05	4.12587e-05
Propionimicrobium sp. Marseille-P3275	0.000100225	9.22021e-05	8.89142e-05	0.000103784	0.000114424	0.000123535	0.000116763	9.21608e-05	8.54888e-05	9.98779e-05	9.90112e-05	8.042e-05	0.000164599	0.000180719	0.000170943	0.000164823	2.84171e-05	5.971e-05	5.3201e-05	6.72364e-05
Virgibacillus sp. Bac332	0.000100225	9.38684e-05	9.81318e-05	0.000122607	0.000101034	0.000100037	9.01306e-05	6.5966e-05	8.02798e-05	9.38766e-05	7.99463e-05	7.49137e-05	0.000118743	0.000148598	9.71208e-05	0.000127938	2.74396e-05	6.00803e-05	5.04692e-05	6.41802e-05
Bacillus flexus	0.000100047	9.63679e-05	0.000100117	0.000105511	9.77296e-05	0.000116821	0.000107284	9.91886e-05	9.56003e-05	0.000112738	9.77473e-05	0.000102735	8.44433e-05	9.98157e-05	0.000109583	9.06972e-05	1.75948e-05	5.51739e-05	4.67131e-05	6.17607e-05
Pedobacter steynii	0.000100047	8.22043e-05	9.26012e-05	6.8211e-05	5.356e-05	8.6609e-05	8.84754e-05	8.86468e-05	7.73689e-05	4.95103e-05	3.77085e-05	6.5785e-05	2.38604e-05	2.11639e-05	3.94172e-05	2.13824e-05	6.28387e-05	4.16581e-05	5.60693e-05	5.60303e-05
Nitrospirillum amazonense	9.9868e-05	0.000104977	0.000106782	0.000112937	0.000128335	0.000117661	0.000111347	0.000145509	0.000164696	0.000143601	0.000139248	0.000150552	7.95967e-05	7.53496e-05	6.78627e-05	7.4304e-05	1.26376e-05	2.83275e-05	3.84495e-05	3.92212e-05
Propionibacterium australiense	9.96894e-05	8.49815e-05	0.000106782	0.000108101	0.000100164	0.0001091	9.64502e-05	9.05635e-05	0.00010035	0.000109523	9.5114e-05	0.00011027	7.54957e-05	9.89151e-05	9.00772e-05	8.2857e-05	2.60432e-05	4.3417e-05	5.32693e-05	5.08093e-05
Vagococcus teuberi	9.95107e-05	0.000110809	0.00011756	0.000102576	0.00014642	0.00014653	0.000160399	0.000159884	0.000130531	0.000152817	0.000157049	0.000121862	0.000124708	0.000119028	0.000115543	0.000102636	3.35838e-05	5.67476e-05	5.98938e-05	9.47422e-05
Candidatus Koribacter versatilis	9.89748e-05	0.000108587	0.00011841	0.000103266	0.000103294	0.000110275	0.000101115	0.000114682	8.76336e-05	8.53034e-05	8.91101e-05	9.31712e-05	0.000155652	0.000143645	0.000130443	0.000150924	3.40726e-05	5.16561e-05	6.2967e-05	8.64649e-05
Vagococcus penaei	9.87961e-05	0.00010831	0.000116425	9.41139e-05	0.000113902	0.000109604	0.000121578	9.59942e-05	0.000101269	0.000123883	0.000113231	0.00010288	0.000124521	0.000124282	0.000119877	0.000120811	1.45925e-05	4.74903e-05	4.84887e-05	5.56483e-05
Bacillus lehensis	9.86174e-05	0.000106921	0.000106498	0.000105511	0.000138247	0.000133438	0.000126243	0.00011021	0.000122718	0.000132456	0.000122289	0.000107661	0.000129741	0.000146647	0.000135454	0.000130967	1.92705e-05	6.96154e-05	5.93475e-05	7.04199e-05
Geobacter sp. M18	9.84388e-05	0.000112753	9.5721e-05	9.53227e-05	0.000131118	8.37556e-05	7.80931e-05	0.000187516	0.000184	0.000170178	0.00015905	0.000176489	8.57482e-05	8.3605e-05	0.000100101	8.73116e-05	2.8836e-05	5.68402e-05	5.15619e-05	5.33561e-05
Spirosoma pollinicola	9.80815e-05	8.41483e-05	5.57309e-05	5.45688e-05	7.51231e-05	7.13349e-05	9.22371e-05	7.42717e-05	6.43464e-05	4.99389e-05	4.9611e-05	6.8683e-05	8.66802e-05	8.2104e-05	9.41408e-05	8.12533e-05	1.55002e-05	3.55483e-05	2.89566e-05	3.33635e-05
Pontibacter akesuensis	9.79028e-05	9.94228e-05	7.95548e-05	7.27008e-05	4.69519e-05	6.51246e-05	5.7178e-05	7.17161e-05	6.14355e-05	3.66505e-05	3.34953e-05	6.41911e-05	1.9573e-05	2.2815e-05	2.09954e-05	1.96006e-05	1.23583e-05	1.34232e-05	1.73467e-05	2.72511e-05
Bacillus horikoshii	9.77242e-05	0.000136637	0.000104939	0.000137458	0.000151985	0.000157944	0.000148512	0.000130654	0.000132676	0.000158819	0.000150413	0.000145915	0.000262091	0.00021314	0.000289331	0.000222734	1.48718e-05	8.84078e-05	5.82548e-05	5.00453e-05
Saccharophagus degradans	9.77242e-05	0.000100534	6.72174e-05	8.65157e-05	8.57308e-05	8.79517e-05	8.15539e-05	9.88692e-05	0.000103873	9.64486e-05	9.20594e-05	0.00010288	2.8707e-05	2.98697e-05	4.172e-05	2.63717e-05	2.59035e-05	2.78647e-05	3.03908e-05	3.10714e-05
Terriglobus roseus	9.77242e-05	7.72054e-05	8.5369e-05	8.16805e-05	8.17312e-05	9.16444e-05	7.80931e-05	7.45911e-05	8.13522e-05	7.48012e-05	7.80504e-05	8.56364e-05	3.72818e-05	3.39223e-05	3.64372e-05	4.61504e-05	6.14423e-06	3.61963e-05	3.10055e-05	2.96706e-05
Flavivirga eckloniae	9.75455e-05	9.22021e-05	7.9413e-05	7.06286e-05	5.77335e-05	8.107e-05	8.17043e-05	7.76259e-05	6.87893e-05	6.45134e-05	5.67735e-05	6.79585e-05	9.4323e-05	8.13536e-05	0.00011026	7.19875e-05	2.5345e-05	3.03642e-05	3.27128e-05	5.55209e-05
Flavobacterium psychrophilum	9.73669e-05	8.88695e-05	9.69973e-05	8.20259e-05	6.88628e-05	0.000123535	0.000109842	0.000126821	0.000127467	6.06554e-05	6.25667e-05	0.000122006	3.39265e-05	4.3979e-05	2.20791e-05	3.01136e-05	7.14965e-05	5.35076e-05	5.33376e-05	5.56483e-05
Gynuella sunshinyii	9.73669e-05	9.9145e-05	0.000108058	0.000111555	0.000105033	9.0973e-05	0.000103823	0.000116279	0.000112147	0.000111237	0.000110176	0.000112878	6.11422e-05	7.05464e-05	7.28745e-05	5.75544e-05	1.78741e-05	3.87884e-05	4.1113e-05	4.43149e-05
Kordia sp. SMS9	9.73669e-05	9.99782e-05	9.37357e-05	7.82268e-05	6.45154e-05	0.000101715	0.00011255	0.00010989	8.96253e-05	6.40847e-05	6.5516e-05	9.3461e-05	4.97712e-05	6.73944e-05	5.54009e-05	5.59507e-05	4.53137e-05	4.22136e-05	4.04983e-05	4.27868e-05
Lactobacillus pentosus	9.68309e-05	0.000121918	9.41611e-05	0.000121571	0.000121553	0.000109772	0.000145052	0.000123946	0.00012762	0.000117667	0.000133876	0.000137221	0.000150432	0.000135089	0.000147645	0.000140946	1.11015e-05	4.2121e-05	3.3464e-05	4.90265e-05
Spirosoma rigui	9.68309e-05	8.22043e-05	7.0479e-05	5.73318e-05	4.72997e-05	5.67322e-05	6.25949e-05	7.17161e-05	6.00566e-05	4.6724e-05	4.94003e-05	7.4479e-05	4.71615e-05	6.24411e-05	2.70909e-05	4.49031e-05	7.26136e-06	2.10142e-05	9.83433e-06	9.42328e-06
Aequorivita sp. H23M31	9.66522e-05	7.88717e-05	7.17553e-05	5.37054e-05	3.14752e-05	6.10962e-05	5.56733e-05	5.90979e-05	4.42764e-05	1.88611e-05	1.92756e-05	4.14416e-05	1.7336e-05	1.71113e-05	1.46291e-05	2.26297e-05	1.38943e-05	1.70335e-05	2.90249e-05	2.97979e-05
Bacillus asahii	9.66522e-05	8.58146e-05	8.79215e-05	8.40981e-05	9.30344e-05	8.49305e-05	8.27576e-05	7.81051e-05	7.50708e-05	8.959e-05	7.91037e-05	8.83895e-05	0.000110541	0.000119028	0.000132203	0.000132393	1.78043e-05	3.66592e-05	3.89959e-05	5.09366e-05
Flavobacterium sp. MEBiC07310	9.66522e-05	0.000102478	6.3814e-05	4.99063e-05	3.54748e-05	5.8075e-05	5.38677e-05	4.40838e-05	3.95271e-05	2.10044e-05	2.47528e-05	4.52091e-05	1.7336e-05	1.63608e-05	1.42227e-05	1.72841e-05	2.57639e-05	2.24028e-05	2.75225e-05	1.92286e-05
Halobacillus mangrovi	9.64736e-05	0.000106088	0.000136278	0.000108447	0.000111641	0.000105408	9.61493e-05	9.90289e-05	0.000105712	0.000137814	0.000127451	9.66488e-05	0.00014018	0.000107171	0.000115272	0.000128829	3.00928e-05	5.62848e-05	6.45378e-05	8.18807e-05
Jeotgalibaca sp. PTS2502	9.64736e-05	9.80342e-05	0.00013642	0.00012727	0.000129553	0.000130417	0.000127597	0.000125863	0.0001195	0.0001391	0.000112388	0.000112878	0.000144467	0.000157604	0.000140466	0.000131502	3.41424e-05	7.13743e-05	6.52207e-05	9.41054e-05
Elizabethkingia anophelis	9.62949e-05	7.10956e-05	7.58678e-05	6.02674e-05	5.54728e-05	8.52662e-05	7.98987e-05	8.8008e-05	6.52656e-05	6.30131e-05	4.76097e-05	7.46239e-05	4.60431e-05	4.65306e-05	6.50181e-05	5.8089e-05	4.02168e-05	4.74903e-05	3.59226e-05	3.5783e-05
Sporosarcina psychrophila	9.61163e-05	0.000127194	0.000106782	0.000132623	0.000119467	0.000123703	0.000111196	0.000114203	0.000105252	0.000147673	0.000138405	0.000111284	0.000132537	0.000166009	0.000123128	0.000113861	2.1435e-05	8.165e-05	5.61376e-05	6.57083e-05
Aeribacillus pallidus	9.59376e-05	8.0538e-05	0.000111178	9.56681e-05	0.000106598	0.000110611	0.00010593	7.25147e-05	7.87477e-05	9.73059e-05	8.00516e-05	8.38976e-05	9.17133e-05	8.16538e-05	0.000125837	9.31918e-05	4.1683e-05	5.11006e-05	5.7845e-05	8.71017e-05
Enterococcus casseliflavus	9.59376e-05	0.000115253	8.09729e-05	0.000128133	0.000124336	0.000100037	0.000118268	0.000110529	0.000118581	0.00012174	0.000116286	0.000117804	0.000121352	0.000114375	0.000112563	0.000104418	1.3266e-05	2.92533e-05	2.33565e-05	3.92212e-05
Gramella sp. SH35	9.59376e-05	8.08157e-05	8.28164e-05	6.40665e-05	6.08636e-05	7.93915e-05	9.10334e-05	0.00010398	7.55304e-05	6.51564e-05	5.45615e-05	8.94038e-05	3.70954e-05	3.61738e-05	4.75445e-05	3.243e-05	5.72531e-06	1.68484e-05	1.55027e-05	1.57904e-05
Robiginitalea biformata	9.59376e-05	8.69255e-05	5.88507e-05	5.02516e-05	5.82552e-05	7.36848e-05	5.85322e-05	7.49106e-05	6.67977e-05	3.51501e-05	3.3706e-05	6.36115e-05	1.28622e-05	1.50099e-05	1.74736e-05	1.72841e-05	8.09921e-06	1.39786e-05	1.12685e-05	1.24795e-05
Enterococcus mundtii	9.5759e-05	0.000139136	0.000127912	0.000120017	0.000144508	0.00015123	0.000152424	0.000119953	0.00012808	0.000127741	0.000138826	0.000116355	0.000218285	0.000209238	0.000220791	0.000202599	2.00386e-05	6.35981e-05	4.88985e-05	7.01652e-05
Streptococcus equi	9.55803e-05	0.000108032	0.000116425	0.00012986	0.000102599	0.000118332	0.00011872	7.68273e-05	9.03913e-05	0.000115095	8.91101e-05	8.98385e-05	0.000116692	0.000116327	0.000103894	0.00010317	1.82931e-05	4.1473e-05	3.92007e-05	6.06146e-05
Lutibacter profundi	9.54017e-05	8.19266e-05	7.06208e-05	5.26692e-05	4.53869e-05	7.2342e-05	8.06511e-05	8.68899e-05	4.47361e-05	4.50093e-05	3.13887e-05	5.46276e-05	3.00119e-05	2.04134e-05	2.34336e-05	3.34992e-05	2.31107e-05	2.84201e-05	2.90249e-05	3.31088e-05
Lentibacillus amyloliquefaciens	9.5223e-05	0.00011803	9.44447e-05	0.000144884	0.000102599	0.000123871	0.000110594	9.91886e-05	8.80933e-05	0.00010888	0.000112704	8.83895e-05	0.000141112	0.000147547	0.000199118	0.000126513	3.31649e-05	8.24831e-05	6.39232e-05	6.37981e-05
Denitrovibrio acetiphilus	9.4687e-05	9.47016e-05	8.74961e-05	9.70496e-05	0.000122771	0.000103897	0.000111798	0.000103661	9.63664e-05	9.34479e-05	0.000109018	0.000103314	9.11541e-05	9.42621e-05	6.58308e-05	7.89368e-05	1.89214e-05	5.15635e-05	3.40104e-05	5.04273e-05
Spirosoma radiotolerans	9.4687e-05	6.88739e-05	6.04106e-05	4.42076e-05	3.40836e-05	4.17939e-05	4.15293e-05	4.37644e-05	2.7577e-05	3.49358e-05	3.34953e-05	3.01394e-05	2.85206e-05	3.7975e-05	2.70909e-05	4.02703e-05	3.17685e-05	2.84201e-05	3.28494e-05	4.36782e-05
Verrucomicrobia bacterium	9.4687e-05	0.000103311	0.000127628	0.000123471	9.02521e-05	0.000106247	0.000116763	0.000114203	9.77452e-05	9.90205e-05	8.79515e-05	9.17222e-05	4.88392e-05	5.29849e-05	7.54481e-05	4.61504e-05	1.75948e-05	4.31393e-05	3.48299e-05	4.04946e-05
Actinoplanes sp. N902-109	9.45084e-05	0.000100256	0.000104088	9.72222e-05	0.000105033	0.000111115	0.000108187	9.69525e-05	9.34555e-05	8.35888e-05	0.000116602	0.000100851	9.30182e-05	9.42621e-05	9.92881e-05	9.94283e-05	1.2079e-05	5.64699e-05	5.30644e-05	5.42475e-05
Desulfuromonas soudanensis	9.45084e-05	0.000108587	0.00011444	9.94672e-05	0.000113554	0.0001232	0.000111648	0.000109251	0.000111993	0.000101592	9.6694e-05	9.80979e-05	8.33249e-05	0.000111523	7.96472e-05	8.65989e-05	3.53991e-05	6.44313e-05	7.02745e-05	9.77984e-05
Streptococcus sobrinus	9.45084e-05	0.000101367	0.000105364	7.9781e-05	0.000111467	0.000122528	0.000110444	0.000100147	8.80933e-05	0.000111452	0.000106384	8.73752e-05	0.000102898	0.000104018	9.69854e-05	0.000113683	1.49417e-05	3.12899e-05	3.67422e-05	5.33561e-05
Algibacter alginicilyticus	9.43297e-05	8.33152e-05	8.6078e-05	7.13193e-05	6.85151e-05	9.76869e-05	9.0582e-05	0.000111487	5.8831e-05	3.64361e-05	3.61286e-05	5.95542e-05	1.6404e-05	2.86689e-05	1.89636e-05	2.38771e-05	1.11015e-05	2.97161e-05	2.60883e-05	2.4959e-05
Flavobacterium anhuiense	9.43297e-05	9.30353e-05	0.000107349	9.10055e-05	5.47773e-05	7.33491e-05	7.92968e-05	9.53553e-05	5.62265e-05	4.62953e-05	4.5819e-05	6.01338e-05	4.90256e-05	5.02831e-05	4.53772e-05	4.9536e-05	2.35296e-05	2.63835e-05	2.90932e-05	4.35508e-05
Hymenobacter sp. APR13	9.43297e-05	8.16489e-05	6.36722e-05	4.64525e-05	5.5299e-05	6.99921e-05	6.47014e-05	7.12369e-05	5.45412e-05	4.05084e-05	4.7083e-05	5.49174e-05	2.3674e-05	3.72245e-05	2.18082e-05	3.59938e-05	4.46853e-06	2.74018e-05	2.0215e-05	2.48316e-05
Salinicoccus halodurans	9.41511e-05	8.69255e-05	0.000130606	9.60134e-05	0.000109207	0.000138306	0.000128199	8.75288e-05	8.07394e-05	9.0233e-05	8.78461e-05	8.05649e-05	4.38061e-05	5.83884e-05	6.6779e-05	5.68416e-05	5.52981e-05	6.04506e-05	8.37284e-05	0.000126196
Rhodopirellula baltica	9.39724e-05	8.16489e-05	9.08995e-05	8.92787e-05	0.000107294	0.000104233	9.04315e-05	9.40775e-05	8.61016e-05	0.000106093	8.43702e-05	8.34629e-05	5.90917e-05	6.2291e-05	5.67554e-05	6.48601e-05	1.98291e-05	4.49908e-05	3.87227e-05	5.45022e-05
Nocardia brasiliensis	9.37938e-05	7.91494e-05	9.41611e-05	9.13509e-05	6.08636e-05	7.70417e-05	6.09397e-05	9.99873e-05	9.82048e-05	9.98779e-05	8.94261e-05	8.79548e-05	5.7414e-05	6.97959e-05	5.82454e-05	6.29e-05	9.35599e-06	3.17528e-05	2.62932e-05	3.73111e-05
Carnobacterium divergens	9.34365e-05	8.49815e-05	9.84154e-05	0.000104475	0.000114771	0.000113297	0.000101566	0.000108612	9.89709e-05	0.00012967	0.000114074	9.37508e-05	0.000141485	0.00013689	0.00015049	0.000163041	2.0248e-05	4.83234e-05	4.77375e-05	5.74311e-05
Aureitalea sp. RR4-38	9.30791e-05	9.47016e-05	7.55841e-05	6.47573e-05	5.33861e-05	7.38526e-05	6.33472e-05	7.17161e-05	6.08226e-05	4.2866e-05	4.03418e-05	5.72358e-05	1.97594e-05	2.8819e-05	1.788e-05	2.72626e-05	1.35452e-05	1.6941e-05	1.45466e-05	1.68091e-05
Desulfovibrio africanus	9.30791e-05	8.80364e-05	9.10413e-05	7.94356e-05	0.000104338	8.22449e-05	7.92968e-05	7.07578e-05	8.15054e-05	6.90143e-05	6.79386e-05	7.53484e-05	6.74801e-05	8.67571e-05	8.57426e-05	8.12533e-05	1.2079e-05	3.49928e-05	3.10738e-05	2.87792e-05
Amycolatopsis mediterranei	9.29005e-05	8.66478e-05	6.80683e-05	6.40665e-05	7.04279e-05	6.4621e-05	6.59052e-05	5.17506e-05	6.12823e-05	7.45869e-05	6.40413e-05	6.49156e-05	0.000101779	0.000100266	7.44999e-05	9.9072e-05	1.13808e-05	3.41597e-05	3.04591e-05	3.25995e-05
Petrotoga mobilis	9.27218e-05	9.77565e-05	0.000117418	0.000118117	0.00012764	0.000115479	0.000120676	0.000111008	0.000105559	0.0001361	0.000121341	0.000106067	0.000121912	0.000114675	9.63081e-05	0.000115465	2.339e-05	5.18412e-05	4.51423e-05	6.64723e-05
Cystobacter fuscus	9.25432e-05	9.22021e-05	8.79215e-05	9.94672e-05	0.000111815	0.000113464	0.000100212	0.000100147	9.11574e-05	8.61607e-05	0.000108175	9.07079e-05	6.33791e-05	7.57999e-05	6.79981e-05	7.03839e-05	1.30565e-05	7.00782e-05	5.49766e-05	6.21427e-05
Tumebacillus algifaecis	9.25432e-05	9.55347e-05	0.000113589	0.000103784	0.000124683	0.000113297	0.000103823	0.000103341	9.85112e-05	9.30193e-05	0.00010333	0.000103749	0.000114642	0.000128184	9.29217e-05	0.000120989	2.57639e-05	5.09155e-05	6.00987e-05	8.31541e-05
Kitasatospora sp. MMS16-BH015	9.23645e-05	0.000103866	9.45865e-05	0.000115009	0.000115641	9.98689e-05	9.69016e-05	0.000124265	0.000137119	0.000136957	0.000144409	0.000121282	8.76123e-05	9.54628e-05	9.91526e-05	9.08754e-05	7.12172e-06	4.38799e-05	3.82446e-05	4.29141e-05
Pseudarcicella sp. HME7025	9.23645e-05	8.0538e-05	5.10512e-05	4.85248e-05	6.41677e-05	8.03986e-05	8.12529e-05	7.85842e-05	5.53072e-05	3.30068e-05	3.15993e-05	5.04255e-05	3.01983e-05	3.66241e-05	3.03418e-05	2.61935e-05	6.49334e-06	3.19379e-05	2.29468e-05	2.50863e-05
Bacillus smithii	9.21859e-05	7.58168e-05	8.55108e-05	9.82584e-05	0.000119814	9.34907e-05	0.000126243	0.00012714	9.33022e-05	0.000105236	0.000121341	0.00010969	0.000120607	0.000132537	0.000131662	0.000120098	1.2847e-05	4.61017e-05	3.90641e-05	4.86445e-05
Thermosulfidibacter takaii	9.21859e-05	9.74787e-05	8.19655e-05	9.7913e-05	0.000107468	0.000115982	0.000102018	9.00844e-05	7.03214e-05	9.10903e-05	8.99528e-05	6.31768e-05	8.66802e-05	9.09599e-05	8.15436e-05	7.64422e-05	1.85025e-05	4.13804e-05	3.29177e-05	5.1446e-05
Flavobacterium album	9.18286e-05	8.85918e-05	6.4523e-05	7.13193e-05	5.8603e-05	8.69447e-05	7.388e-05	9.07233e-05	5.54604e-05	4.95103e-05	4.98216e-05	7.20157e-05	3.84003e-05	2.95695e-05	4.67318e-05	4.8645e-05	1.1311e-05	2.73092e-05	1.9054e-05	2.59777e-05
Lactobacillus amylophilus	9.14713e-05	8.85918e-05	7.82785e-05	9.75676e-05	6.22548e-05	9.24836e-05	9.7654e-05	6.86813e-05	6.17419e-05	6.02268e-05	5.27709e-05	6.02787e-05	6.17014e-05	7.47492e-05	4.40227e-05	5.89799e-05	1.30565e-05	2.61983e-05	3.00493e-05	4.52063e-05
Geobacter daltonii	9.12926e-05	0.000110531	0.000113163	0.000106893	0.00010712	0.000119171	0.000108036	0.000120112	0.00012042	0.000113595	0.000115443	0.000134468	0.000102339	8.60066e-05	9.8069e-05	9.99629e-05	1.22885e-05	4.62868e-05	3.1825e-05	4.01126e-05
Flavobacterium kingsejongi	9.11139e-05	7.55391e-05	6.23959e-05	4.42076e-05	4.53869e-05	6.86494e-05	6.44005e-05	7.21953e-05	5.08643e-05	3.64361e-05	2.63328e-05	4.30355e-05	2.4606e-05	2.56669e-05	2.56009e-05	2.22734e-05	5.44602e-06	1.52747e-05	1.0449e-05	1.12061e-05
Pedobacter cryoconitis	9.11139e-05	0.00011553	0.000115291	9.08329e-05	7.51231e-05	0.000107926	0.000106983	0.00010446	6.44996e-05	6.23701e-05	6.98345e-05	7.24504e-05	8.81715e-05	8.34549e-05	0.000132203	0.000106734	2.35296e-05	5.13784e-05	4.48691e-05	5.29741e-05
Gammaproteobacteria bacterium DM2	9.07566e-05	6.55413e-05	6.49485e-05	5.76771e-05	8.50352e-05	9.58405e-05	7.91464e-05	6.88411e-05	6.80233e-05	6.90143e-05	6.84652e-05	6.37564e-05	8.46297e-05	9.17104e-05	9.83399e-05	9.71119e-05	1.64777e-05	5.36927e-05	3.9952e-05	5.92138e-05
Pirellula staleyi	9.07566e-05	9.08135e-05	9.17504e-05	9.39412e-05	0.00010086	8.47626e-05	9.17857e-05	9.5515e-05	0.000101729	0.000107594	0.000102171	9.89673e-05	8.68667e-05	9.38118e-05	9.8069e-05	0.000106556	1.6757e-05	3.82329e-05	4.05666e-05	5.41202e-05
Anaeromyxobacter sp. Fw109-5	9.0578e-05	8.60923e-05	7.96966e-05	6.23397e-05	8.99043e-05	0.000108261	0.00010277	0.000100147	8.7174e-05	7.50156e-05	7.32051e-05	9.86775e-05	0.000106067	0.000129685	0.000118252	0.000118673	2.84869e-05	4.91566e-05	4.93765e-05	5.13187e-05
Thermomicrobium roseum	9.0578e-05	0.000103866	8.84887e-05	0.000104302	0.000106251	0.000102554	0.000101115	0.000111487	9.65196e-05	9.62342e-05	0.000101223	0.000103314	9.58143e-05	0.000102217	9.99654e-05	9.71119e-05	1.11015e-05	3.97141e-05	3.92007e-05	5.15734e-05
Granulosicoccus antarcticus	9.03993e-05	9.49793e-05	0.000109335	8.34074e-05	9.33822e-05	0.000107422	8.65193e-05	7.36328e-05	9.05445e-05	7.90878e-05	6.61479e-05	6.85381e-05	9.82376e-05	9.56129e-05	0.0001043	0.00010513	2.4158e-05	4.0177e-05	4.93765e-05	7.22027e-05
Bifidobacterium choerinum	9.02207e-05	0.000110254	0.00010976	0.000141603	0.000103468	0.000107422	9.49456e-05	0.000107175	0.000117662	0.000124526	0.000121657	0.000111429	0.000102898	8.48058e-05	8.99417e-05	8.96281e-05	1.85723e-05	4.44353e-05	3.4625e-05	4.95359e-05
Streptococcus gordonii	8.98634e-05	0.000104144	0.00011132	9.515e-05	9.58167e-05	0.000116821	0.000108036	9.82303e-05	8.57952e-05	0.000114667	8.99528e-05	9.09977e-05	0.000108304	9.98157e-05	8.96708e-05	9.49737e-05	9.98438e-06	3.39745e-05	2.2537e-05	3.00526e-05
Chloracidobacterium thermophilum	8.9506e-05	8.69255e-05	8.80633e-05	8.15078e-05	9.98163e-05	9.9701e-05	0.000112099	0.00010989	0.00011567	9.66629e-05	9.98539e-05	0.00011679	9.46958e-05	7.03963e-05	8.49299e-05	9.42609e-05	1.41736e-05	4.17507e-05	3.8108e-05	4.48242e-05
Kibdelosporangium phytohabitans	8.9506e-05	0.000126917	0.000122523	0.000104993	9.63384e-05	0.000116654	0.000114206	0.000100307	0.000102495	7.71589e-05	9.3534e-05	0.000117659	7.82918e-05	7.48993e-05	6.47472e-05	8.71334e-05	1.2847e-05	3.33265e-05	3.64007e-05	4.39329e-05
Lactobacillus paracasei	8.9506e-05	7.1651e-05	7.87039e-05	9.20417e-05	8.48613e-05	9.58405e-05	0.000109691	9.31191e-05	0.000101116	0.000128598	0.000108912	9.24467e-05	0.000130673	0.000124132	0.000193158	0.000134709	8.51814e-06	3.63814e-05	2.98445e-05	2.43222e-05
Kutzneria albida	8.93274e-05	0.000100811	0.000108484	0.000104993	9.45995e-05	8.61054e-05	8.56165e-05	7.61884e-05	8.59484e-05	9.83775e-05	9.55353e-05	8.59262e-05	0.00010588	8.82581e-05	9.00772e-05	9.26572e-05	1.11015e-05	4.20284e-05	4.61667e-05	5.1064e-05
Aerococcus urinaeequi	8.91487e-05	0.000111087	0.000105789	0.000114836	9.26866e-05	0.000113968	9.2839e-05	8.8008e-05	9.7592e-05	0.000107379	9.543e-05	0.000100706	7.95967e-05	6.93457e-05	7.96472e-05	7.1453e-05	1.2079e-05	3.94364e-05	4.44594e-05	5.39928e-05
Bacillus sp. OxB-1	8.91487e-05	7.27619e-05	7.91294e-05	8.59976e-05	8.97304e-05	7.85523e-05	8.71212e-05	7.71467e-05	7.17002e-05	7.50156e-05	7.93143e-05	7.12912e-05	7.84782e-05	8.09033e-05	7.47708e-05	8.16096e-05	1.21488e-05	5.31373e-05	4.16593e-05	4.34235e-05
Rhodococcus opacus	8.91487e-05	8.63701e-05	6.65084e-05	8.39254e-05	8.90348e-05	8.34199e-05	8.8024e-05	7.49106e-05	8.08926e-05	0.000106308	8.18423e-05	6.56401e-05	0.000109795	0.000137791	0.000105248	0.000134175	3.67956e-05	5.46184e-05	5.34059e-05	5.23374e-05
Kurthia zopfii	8.89701e-05	7.52614e-05	7.54423e-05	7.64999e-05	6.29504e-05	6.5796e-05	6.6808e-05	7.81051e-05	7.38451e-05	8.7018e-05	8.37382e-05	8.50568e-05	7.47501e-05	6.079e-05	8.24917e-05	6.8602e-05	1.19394e-05	2.27731e-05	2.24004e-05	3.28541e-05
Helicobacter pylori	8.87914e-05	0.000102478	8.32418e-05	9.82584e-05	0.000101555	0.000115814	0.000113002	0.000105258	8.47227e-05	8.55177e-05	8.66875e-05	9.14324e-05	0.000104576	0.000118728	0.000105654	0.000111545	1.60588e-05	4.60091e-05	4.06349e-05	5.22101e-05
Streptococcus sanguinis	8.87914e-05	9.83119e-05	0.000109335	7.89175e-05	9.11215e-05	9.81904e-05	0.000101566	7.82648e-05	7.50708e-05	0.000110809	9.43767e-05	8.54915e-05	0.000126013	9.4112e-05	0.000126921	0.000122058	2.24125e-05	4.9712e-05	5.34742e-05	5.57756e-05
Streptomyces venezuelae	8.87914e-05	0.000100534	0.000102386	9.94672e-05	0.000103294	9.48335e-05	7.91464e-05	7.2355e-05	8.45695e-05	9.38766e-05	9.90112e-05	9.01283e-05	0.000110541	9.47123e-05	9.82044e-05	0.000112792	7.95957e-06	6.14689e-05	4.99229e-05	5.84498e-05
Candidatus Cloacimonas acidaminovorans	8.84341e-05	0.000106088	9.48701e-05	6.95925e-05	0.000105033	0.00012001	0.000107735	0.000126821	9.22298e-05	7.93022e-05	8.81621e-05	9.28814e-05	8.70531e-05	8.84082e-05	8.70972e-05	8.53516e-05	2.73698e-05	4.99898e-05	5.06058e-05	7.20753e-05
Desulfomicrobium baculatum	8.84341e-05	9.74787e-05	9.16085e-05	0.000106375	0.00012051	0.000121857	9.90082e-05	0.000111008	0.000109542	0.000119382	9.99592e-05	9.65039e-05	0.000118183	0.000117227	0.000101184	0.000130077	2.54846e-05	6.38758e-05	6.63817e-05	6.58356e-05
Geovibrio thiophilus	8.84341e-05	9.24798e-05	0.000117418	8.80699e-05	0.000173548	0.000136627	0.00013828	0.000194863	0.000197329	7.48012e-05	0.000202868	0.00010911	0.000122284	9.80145e-05	0.000113646	0.000101032	6.33973e-05	8.15574e-05	0.000108656	0.000143132
Ruegeria sp. NKC1-1	8.84341e-05	8.58146e-05	0.00011132	9.10055e-05	0.000112859	0.000128403	0.000112099	8.59315e-05	9.10042e-05	8.65894e-05	7.52064e-05	8.66507e-05	8.64938e-05	0.000115726	0.000105384	9.58646e-05	3.75636e-05	5.57293e-05	7.13672e-05	0.000104165
Deinococcus maricopensis	8.82555e-05	8.4426e-05	8.11147e-05	8.11624e-05	6.31243e-05	5.45502e-05	6.81622e-05	7.18758e-05	7.01682e-05	9.30193e-05	8.62662e-05	8.65058e-05	5.49907e-05	3.9476e-05	6.59663e-05	5.47034e-05	4.81764e-06	3.16602e-05	2.41761e-05	2.55957e-05
Pseudomonas chlororaphis	8.82555e-05	0.000109976	8.57944e-05	8.42708e-05	0.000116858	0.000122025	0.000120375	0.000102383	0.000100656	9.45196e-05	0.00010333	0.000114617	0.000110913	0.000118278	8.35754e-05	0.000107981	1.78043e-05	4.24913e-05	3.83129e-05	5.20827e-05
Euzebyella marina	8.78982e-05	8.77586e-05	8.43763e-05	7.54638e-05	6.59066e-05	0.000100876	9.61493e-05	9.95081e-05	7.99734e-05	3.77221e-05	4.29751e-05	6.65095e-05	4.02644e-05	3.60237e-05	4.65963e-05	4.08048e-05	8.3785e-06	2.41617e-05	1.76198e-05	2.17754e-05
Lactococcus piscium	8.78982e-05	0.000107199	8.9765e-05	9.70496e-05	0.00012051	0.000135452	0.000139785	0.000120592	0.000115364	0.000123669	0.000111546	0.00012447	0.000107744	0.000101767	0.000144123	0.000104239	1.73854e-05	5.2119e-05	3.91324e-05	5.7049e-05
Paludisphaera borealis	8.77195e-05	8.99804e-05	8.83469e-05	8.11624e-05	8.72958e-05	9.65119e-05	6.51528e-05	7.84245e-05	9.2383e-05	6.77283e-05	7.75237e-05	8.38976e-05	4.77207e-05	6.39421e-05	6.35281e-05	7.00275e-05	1.15903e-05	3.31414e-05	2.75908e-05	3.18354e-05
Geobacter sulfurreducens	8.75408e-05	5.47103e-05	7.72858e-05	5.42234e-05	6.95584e-05	6.32783e-05	6.98173e-05	6.75633e-05	5.9597e-05	6.51564e-05	5.73001e-05	6.05685e-05	7.84782e-05	6.8295e-05	7.24681e-05	7.39476e-05	8.51814e-06	2.16622e-05	2.71127e-05	2.0884e-05
Pedobacter heparinus	8.75408e-05	7.63722e-05	6.87773e-05	5.42234e-05	6.03419e-05	8.74482e-05	7.65884e-05	8.89663e-05	3.70758e-05	3.32212e-05	2.58061e-05	4.76724e-05	1.82681e-05	2.52166e-05	1.43582e-05	2.10261e-05	0.000170782	0.000110903	0.000135359	0.000127342
Chloroherpeton thalassium	8.73622e-05	7.80385e-05	8.73543e-05	7.63272e-05	0.000107468	9.21479e-05	9.29895e-05	7.2355e-05	7.66028e-05	9.51626e-05	7.68917e-05	6.66544e-05	8.96628e-05	0.000101167	0.000131391	8.33915e-05	1.29168e-05	4.712e-05	3.39421e-05	4.18954e-05
Paenibacillus sp. FSL H7-0737	8.73622e-05	9.47016e-05	0.00010423	0.000131759	0.000126422	0.000118164	0.000106983	0.00012139	0.000128386	0.00012324	0.000126187	0.000127658	0.000133096	0.000131637	0.000132068	0.000126513	4.21019e-05	9.32217e-05	6.54256e-05	8.00979e-05
Candidatus Methanoplasma termitum	8.71835e-05	0.000106366	0.000113305	9.68769e-05	0.000167462	0.000128739	0.000128951	0.000188474	0.000212956	9.2805e-05	0.000171479	0.000181851	0.000100288	0.000124882	0.000108499	0.000113149	2.72301e-05	0.000104608	8.4343e-05	0.000119956
Aminobacterium colombiense	8.70049e-05	0.000105533	0.000121388	0.000111901	0.000157376	0.000144852	0.000134519	0.000123147	0.000145545	0.000114881	0.000142724	0.000129252	0.000132537	0.000149949	0.000135725	0.00014255	1.82931e-05	7.25777e-05	6.70647e-05	8.28994e-05
Bacillus kochii	8.70049e-05	0.000114975	0.000109193	0.000105857	0.000128335	0.000114639	0.000116011	0.000174419	0.000157036	0.000139958	0.000159893	0.000161854	0.000116879	0.000128184	0.000123128	0.000110476	2.23427e-05	7.04485e-05	5.92792e-05	7.1948e-05
Rubinisphaera brasiliensis	8.70049e-05	8.60923e-05	7.91294e-05	7.94356e-05	9.47734e-05	9.76869e-05	0.000104576	9.59942e-05	7.0781e-05	7.35152e-05	7.61544e-05	7.37545e-05	9.30182e-05	0.000107921	8.30336e-05	9.97847e-05	9.00688e-06	4.55462e-05	3.73568e-05	4.04946e-05
[Polyangium] brachysporum	8.66476e-05	7.72054e-05	7.09044e-05	6.44119e-05	7.26886e-05	5.92499e-05	8.21557e-05	6.86813e-05	7.21599e-05	7.63015e-05	7.36264e-05	7.65076e-05	7.2886e-05	7.85017e-05	6.61017e-05	7.21657e-05	8.16903e-06	3.18453e-05	2.26736e-05	2.10114e-05
Sphaerobacter thermophilus	8.66476e-05	9.85896e-05	0.000105648	9.39412e-05	0.00010312	0.000103394	9.93091e-05	9.18413e-05	7.61432e-05	0.000100521	9.3218e-05	8.63609e-05	0.000101034	0.000109272	9.00772e-05	0.000116	3.21874e-05	6.05432e-05	6.44695e-05	9.27047e-05
Pannonibacter phragmitetus	8.61116e-05	9.60902e-05	9.37357e-05	8.68611e-05	7.99922e-05	8.09022e-05	5.47705e-05	9.77511e-05	9.85112e-05	0.000110809	9.4798e-05	8.43323e-05	7.21403e-05	6.66439e-05	7.32808e-05	7.84023e-05	1.47322e-05	3.44374e-05	4.2274e-05	4.60977e-05
Stigmatella aurantiaca	8.61116e-05	8.10934e-05	7.3457e-05	7.18374e-05	7.49492e-05	9.08051e-05	8.74221e-05	7.45911e-05	7.93605e-05	7.33009e-05	7.22571e-05	6.94075e-05	8.01559e-05	0.000101317	6.59663e-05	9.78247e-05	1.66174e-05	3.11973e-05	2.85469e-05	4.08767e-05
Teredinibacter turnerae	8.61116e-05	6.10978e-05	5.98434e-05	6.32031e-05	5.98203e-05	5.5893e-05	5.91341e-05	6.38896e-05	5.68393e-05	5.52972e-05	6.04601e-05	6.39013e-05	5.03305e-05	4.48795e-05	4.21263e-05	5.73762e-05	3.22572e-05	4.78606e-05	3.16884e-05	3.48916e-05
Kribbella flavida	8.5933e-05	7.63722e-05	9.68555e-05	7.28735e-05	0.000100512	9.68476e-05	8.96792e-05	8.11398e-05	9.91241e-05	0.000121525	8.38436e-05	9.07079e-05	0.000109609	0.000124432	9.77981e-05	0.000120276	9.0767e-06	2.54578e-05	3.0664e-05	3.97306e-05
Thioploca ingrica	8.5933e-05	7.33173e-05	7.20389e-05	8.11624e-05	7.63404e-05	8.20771e-05	7.71903e-05	8.64107e-05	8.68676e-05	6.6228e-05	8.46862e-05	7.49137e-05	8.1088e-05	0.000100116	7.81572e-05	9.0519e-05	1.16601e-05	4.7768e-05	3.70836e-05	5.25921e-05
Turneriella parva	8.55756e-05	8.74809e-05	9.89826e-05	9.34231e-05	9.82513e-05	0.000123871	0.000108187	0.000136724	7.21599e-05	8.25171e-05	7.56277e-05	7.8826e-05	8.22064e-05	9.96656e-05	7.74799e-05	7.41258e-05	2.52053e-05	6.15615e-05	5.3201e-05	5.42475e-05
Phycisphaera mikurensis	8.5397e-05	8.52592e-05	0.000105648	9.39412e-05	9.30344e-05	9.60084e-05	8.60679e-05	0.000102383	9.42215e-05	0.00010888	8.64768e-05	9.91122e-05	8.81715e-05	8.67571e-05	0.000100778	8.94499e-05	1.27074e-05	4.2121e-05	3.74251e-05	4.24048e-05
Frankia sp. EAN1pec	8.52183e-05	9.24798e-05	9.04741e-05	0.000103957	9.89469e-05	0.000113129	0.000111196	0.000106855	0.000101116	9.47339e-05	9.59566e-05	0.000103749	0.000120234	0.000120379	0.000153876	0.00012972	3.23969e-05	8.75747e-05	7.96991e-05	8.95211e-05
Pasteurella multocida	8.52183e-05	7.52614e-05	8.33836e-05	6.89017e-05	8.8687e-05	8.49305e-05	9.49456e-05	8.96052e-05	6.89425e-05	7.54442e-05	7.23625e-05	8.46221e-05	9.60007e-05	8.13536e-05	7.7209e-05	8.32133e-05	2.32503e-05	5.32298e-05	5.90743e-05	6.48169e-05
Tistrella mobilis	8.52183e-05	7.88717e-05	0.000100117	8.80699e-05	6.93845e-05	8.12379e-05	8.56165e-05	8.40148e-05	7.76753e-05	7.60872e-05	7.47851e-05	8.12894e-05	0.000108677	7.80514e-05	0.000105248	0.000102636	2.08764e-05	4.712e-05	4.56204e-05	5.50116e-05
Kocuria rosea	8.50397e-05	0.000102478	0.000107775	8.56523e-05	0.00012451	0.000121018	0.000118419	0.000110689	0.000104027	9.77346e-05	9.5114e-05	0.000106792	9.71192e-05	8.88585e-05	0.00011175	0.000100141	1.16601e-05	3.50854e-05	4.03617e-05	3.94759e-05
Paenibacillus sabinae	8.50397e-05	0.000113864	8.62198e-05	8.6343e-05	9.92947e-05	0.000110275	9.82559e-05	0.000105578	9.77452e-05	0.00010545	0.000123659	0.000101865	0.000172615	0.000175165	0.000153741	0.000161081	1.31961e-05	6.99857e-05	5.26546e-05	7.02926e-05
Desulfovibrio salexigens	8.4861e-05	8.10934e-05	8.42345e-05	8.9106e-05	9.96425e-05	0.000114639	9.19362e-05	0.000108932	9.17702e-05	9.30193e-05	8.58449e-05	9.27365e-05	9.0222e-05	9.84648e-05	0.000100643	9.49737e-05	1.76647e-05	5.01749e-05	4.59618e-05	6.30341e-05
Desulfurispirillum indicum	8.4861e-05	0.00011553	9.74227e-05	9.65315e-05	0.000106077	9.88618e-05	0.000119321	8.83274e-05	8.59484e-05	8.16598e-05	9.78526e-05	9.31712e-05	0.000107558	0.000154602	0.000123805	0.000128651	1.50115e-05	4.23987e-05	3.85861e-05	5.45022e-05
Gemmata obscuriglobus	8.4861e-05	8.10934e-05	6.56575e-05	6.73476e-05	8.17312e-05	8.25806e-05	7.94473e-05	7.36328e-05	8.07394e-05	8.08025e-05	6.98345e-05	8.6216e-05	7.02762e-05	9.42621e-05	7.20617e-05	8.25006e-05	1.61286e-05	3.76775e-05	3.31909e-05	4.55883e-05
Microlunatus phosphovorus	8.4861e-05	7.94271e-05	9.04741e-05	5.92313e-05	8.83392e-05	7.93915e-05	6.07892e-05	6.32507e-05	7.87477e-05	7.0086e-05	6.94132e-05	6.8683e-05	8.87307e-05	9.4112e-05	9.53599e-05	0.000104952	1.15204e-05	3.0179e-05	2.45175e-05	2.96706e-05
Gemmata sp. SH-PL17	8.46824e-05	9.3313e-05	7.79949e-05	6.57934e-05	9.42517e-05	9.7519e-05	9.2839e-05	0.000104779	9.57535e-05	9.75202e-05	0.00010512	0.000101865	9.32046e-05	0.000104169	8.08663e-05	8.96281e-05	1.38943e-05	5.04526e-05	3.85178e-05	3.60377e-05
Melissococcus plutonius	8.46824e-05	0.000100534	9.37357e-05	0.000103094	0.000105903	0.000110443	0.000112851	0.000118994	0.000101882	0.000115524	0.000102803	9.21569e-05	0.000100847	9.99658e-05	0.000107551	0.000106199	2.82774e-05	4.65645e-05	5.41571e-05	7.53862e-05
Paenibacillus lautus	8.46824e-05	9.97005e-05	7.47333e-05	0.000105857	7.28625e-05	8.71125e-05	7.34286e-05	8.88066e-05	7.43047e-05	8.33744e-05	7.09932e-05	8.4767e-05	7.53093e-05	0.000103418	7.51772e-05	8.96281e-05	3.77032e-06	3.24008e-05	2.51322e-05	3.83298e-05
Streptococcus pyogenes	8.46824e-05	0.000134137	7.35988e-05	0.000116045	9.84252e-05	8.72803e-05	0.000132864	0.000105897	7.89009e-05	0.000157747	9.50087e-05	0.000100271	0.000100661	0.000113325	0.000114324	9.10536e-05	7.88975e-06	4.33245e-05	2.31517e-05	2.90339e-05
Streptococcus ruminantium	8.46824e-05	8.02603e-05	7.58678e-05	9.75676e-05	0.000114424	0.000105744	9.31399e-05	8.24176e-05	8.53356e-05	7.24436e-05	9.27967e-05	8.73752e-05	7.53093e-05	9.78644e-05	7.28745e-05	9.67555e-05	2.05273e-05	4.79531e-05	6.05767e-05	6.13787e-05
Bifidobacterium thermophilum	8.43251e-05	9.49793e-05	0.000111178	0.00010931	8.67741e-05	9.21479e-05	0.000114958	0.000102703	8.27311e-05	0.000127312	0.000127451	0.000107372	0.00016199	0.000154001	0.000101726	0.00014148	1.48718e-05	5.971e-05	3.66739e-05	5.61576e-05
Chlorobium limicola	8.43251e-05	6.49858e-05	8.82051e-05	7.56365e-05	8.43396e-05	8.107e-05	6.31967e-05	5.27089e-05	5.53072e-05	7.15863e-05	6.57266e-05	4.8252e-05	7.88511e-05	8.72074e-05	4.40227e-05	7.92932e-05	3.3514e-06	1.44415e-05	1.77564e-05	2.5723e-05
Fervidobacterium nodosum	8.43251e-05	8.02603e-05	8.26746e-05	8.34074e-05	0.000104338	7.97272e-05	9.84063e-05	0.000105737	0.000109848	0.000106093	0.000105963	0.000106212	7.49365e-05	7.15971e-05	6.32572e-05	7.28785e-05	9.91455e-06	2.61058e-05	2.06248e-05	2.85245e-05
Lactobacillus curvatus	8.43251e-05	8.38706e-05	7.28898e-05	9.32505e-05	0.000105207	8.77839e-05	0.000100663	7.20355e-05	7.85945e-05	8.31601e-05	7.8577e-05	8.53466e-05	0.000117065	0.000100716	0.000123534	0.000113861	2.71603e-05	6.91525e-05	5.32693e-05	5.60303e-05
Methanospirillum hungatei	8.43251e-05	0.000106366	7.58678e-05	0.000107756	9.61645e-05	8.6609e-05	8.69707e-05	8.35357e-05	9.0851e-05	0.000105665	0.000112704	0.000110704	7.68006e-05	8.52561e-05	8.79099e-05	8.55298e-05	1.24281e-05	6.43387e-05	4.25471e-05	5.45022e-05
Magnetospirillum gryphiswaldense	8.41464e-05	8.13711e-05	7.79949e-05	5.19785e-05	6.81673e-05	6.44532e-05	7.04192e-05	6.96397e-05	6.32739e-05	7.82305e-05	6.4884e-05	6.21625e-05	5.59227e-05	5.6137e-05	5.55363e-05	5.89799e-05	8.02939e-06	2.13845e-05	1.53661e-05	2.1266e-05
Tamlana sp. UJ94	8.41464e-05	7.38728e-05	9.79899e-05	6.75202e-05	3.96483e-05	6.22712e-05	7.29772e-05	6.91605e-05	4.7647e-05	3.21495e-05	2.35942e-05	5.10051e-05	1.30486e-05	1.18578e-05	2.30272e-05	8.01841e-06	5.41111e-05	3.46225e-05	4.30252e-05	5.01726e-05
Thermoanaerobacter kivui	8.41464e-05	9.02581e-05	0.000156841	0.000110346	0.000142247	0.000161301	0.000155133	0.000108133	0.000101575	0.000105022	9.73259e-05	8.75201e-05	9.35774e-05	9.83147e-05	0.000101862	9.96065e-05	3.8192e-05	5.46184e-05	5.72986e-05	0.000103274
Staphylococcus lutrae	8.37891e-05	8.49815e-05	6.22541e-05	7.16647e-05	5.14732e-05	4.66614e-05	3.97237e-05	3.21045e-05	6.86361e-05	2.50766e-05	2.49635e-05	6.63646e-05	1.99458e-05	1.59105e-05	2.34336e-05	2.61935e-05	5.93477e-06	1.83296e-05	2.00784e-05	1.89739e-05
Arcanobacterium haemolyticum	8.36104e-05	6.94293e-05	8.21073e-05	7.7536e-05	9.66862e-05	8.5434e-05	9.11838e-05	9.05635e-05	8.7174e-05	0.000127741	8.32116e-05	7.86811e-05	9.52551e-05	7.32482e-05	9.04835e-05	7.78677e-05	1.52908e-05	3.12899e-05	3.15518e-05	4.60977e-05
Burkholderia gladioli	8.34318e-05	7.88717e-05	8.48017e-05	7.85721e-05	0.000104512	0.000112961	9.13343e-05	9.74317e-05	9.56003e-05	9.34479e-05	9.03741e-05	0.000109835	6.18878e-05	6.85952e-05	6.93527e-05	7.27003e-05	9.00688e-06	3.35117e-05	2.58151e-05	3.6547e-05
Lactococcus raffinolactis	8.34318e-05	0.000101922	0.000106782	0.000106029	0.000126944	0.0001138	0.000113303	9.74317e-05	0.000101882	0.000120239	0.000111335	9.43304e-05	0.00010383	0.000102668	9.49535e-05	9.88938e-05	1.41038e-05	5.17487e-05	3.97471e-05	5.90865e-05
Methanothrix soehngenii	8.34318e-05	5.63766e-05	6.94864e-05	4.83521e-05	5.47773e-05	7.16706e-05	6.40995e-05	6.96397e-05	5.19367e-05	4.90816e-05	4.31858e-05	5.59317e-05	4.52974e-05	5.49362e-05	3.54891e-05	4.34776e-05	1.0124e-05	1.93479e-05	2.13077e-05	2.34309e-05
Bradymonas sediminis	8.32531e-05	7.27619e-05	7.45915e-05	7.73633e-05	9.23388e-05	9.19801e-05	8.351e-05	7.39522e-05	5.83714e-05	6.6871e-05	5.55095e-05	6.4336e-05	6.93442e-05	7.50494e-05	6.12254e-05	6.68201e-05	2.85567e-05	5.49887e-05	3.84495e-05	6.08693e-05
Desulfovibrio alaskensis	8.32531e-05	7.94271e-05	8.69289e-05	7.27008e-05	8.12095e-05	0.000106583	9.69016e-05	8.17787e-05	7.35387e-05	5.57258e-05	7.39424e-05	6.78136e-05	7.19539e-05	6.66439e-05	7.82926e-05	5.89799e-05	3.00229e-05	4.92492e-05	5.47718e-05	8.25174e-05
Thiomonas intermedia	8.32531e-05	7.88717e-05	6.99118e-05	6.493e-05	6.53849e-05	5.82428e-05	7.01183e-05	7.10772e-05	5.91374e-05	5.78691e-05	5.05589e-05	6.24523e-05	6.95306e-05	8.91587e-05	5.30981e-05	7.55513e-05	3.63068e-05	3.65666e-05	2.54736e-05	3.56556e-05
Actinomyces sp. Z16	8.30745e-05	0.000123862	9.8699e-05	9.11782e-05	0.000161897	0.000119003	0.0001285	0.000151099	0.000200853	0.000167178	0.000163474	0.000183155	0.000126945	0.000126833	0.000144394	0.000130433	7.81993e-06	6.6653e-05	4.91717e-05	5.46295e-05
Cyclobacterium amurskyense	8.28958e-05	9.60902e-05	6.50903e-05	7.52911e-05	8.26006e-05	9.43299e-05	7.85445e-05	9.88692e-05	8.1965e-05	4.02941e-05	5.84588e-05	8.96936e-05	4.60431e-05	3.4973e-05	5.90581e-05	3.9023e-05	1.64777e-05	3.34191e-05	3.5786e-05	3.33635e-05
Granulicella tundricola	8.28958e-05	7.49836e-05	8.94814e-05	7.61545e-05	7.39058e-05	7.70417e-05	7.40304e-05	8.9126e-05	7.09342e-05	7.20149e-05	5.81428e-05	7.52035e-05	6.20742e-05	7.42989e-05	5.35045e-05	6.87802e-05	7.0519e-06	3.0827e-05	3.03225e-05	2.94159e-05
Planctomyces sp. SH-PL14	8.28958e-05	8.88695e-05	8.79215e-05	9.42866e-05	8.6948e-05	9.11408e-05	8.81745e-05	9.20011e-05	7.82881e-05	7.33009e-05	6.63586e-05	7.79566e-05	6.5616e-05	7.54997e-05	7.70736e-05	7.21657e-05	1.06128e-05	4.67497e-05	3.84495e-05	3.85845e-05
Rivularia sp. PCC 7116	8.28958e-05	7.13733e-05	8.08311e-05	7.92629e-05	6.12114e-05	6.99921e-05	7.80931e-05	6.88411e-05	5.86778e-05	7.90878e-05	7.53117e-05	5.75256e-05	8.87307e-05	8.48058e-05	0.00012069	9.58646e-05	6.33973e-05	5.88768e-05	6.19426e-05	7.36034e-05
Bacillus freudenreichii	8.27172e-05	8.97027e-05	0.000113022	9.53227e-05	9.25127e-05	8.7616e-05	9.5096e-05	9.47164e-05	9.34555e-05	0.000107379	8.96368e-05	8.99834e-05	0.000149873	0.000140943	0.000128004	0.000153063	2.00386e-05	4.40651e-05	4.43228e-05	5.51389e-05
Egicoccus halophilus	8.27172e-05	9.41461e-05	7.44497e-05	6.90744e-05	8.71219e-05	8.20771e-05	8.77231e-05	9.10427e-05	8.50291e-05	6.64423e-05	8.91101e-05	9.11426e-05	7.41908e-05	7.64003e-05	8.18145e-05	7.00275e-05	9.49563e-06	4.49908e-05	3.07323e-05	4.1768e-05
Flavobacterium crassostreae	8.27172e-05	5.11e-05	4.73642e-05	2.6421e-05	2.64322e-05	3.23944e-05	3.47582e-05	5.207e-05	2.32873e-05	2.25047e-05	2.01182e-05	3.49211e-05	2.81478e-05	2.07136e-05	2.96645e-05	2.90445e-05	3.24667e-05	2.3236e-05	2.4859e-05	2.66144e-05
Pelobacter sp. SFB93	8.25385e-05	9.58124e-05	7.96966e-05	9.01421e-05	0.000106598	9.9701e-05	8.87764e-05	8.51329e-05	0.000100043	9.0233e-05	0.00010354	0.000103749	0.000106253	9.36617e-05	0.000103623	0.000113327	1.96196e-05	5.93397e-05	5.75035e-05	7.43675e-05
Chryseobacterium taklimakanense	8.23599e-05	6.72076e-05	3.91393e-05	3.40192e-05	4.41696e-05	5.13611e-05	4.78489e-05	4.60005e-05	3.37052e-05	3.36498e-05	3.0862e-05	3.2168e-05	3.44857e-05	2.64174e-05	2.49236e-05	2.6728e-05	1.50813e-05	2.03662e-05	2.40395e-05	4.34235e-05
Desulfarculus baarsii	8.23599e-05	0.000114697	9.82736e-05	0.000116563	0.00014103	0.000117996	0.00013497	0.000123147	0.000110921	0.000130956	0.000130295	0.000133454	0.000102152	9.51626e-05	9.88817e-05	9.69337e-05	1.51511e-05	6.56347e-05	4.83521e-05	5.60303e-05
Streptomyces luteoverticillatus	8.23599e-05	7.55391e-05	7.03372e-05	6.493e-05	7.66882e-05	7.60346e-05	8.11025e-05	6.40493e-05	7.72157e-05	7.58729e-05	5.90908e-05	7.25953e-05	8.48162e-05	9.51626e-05	7.53126e-05	8.98062e-05	7.75011e-06	2.30508e-05	2.66346e-05	2.66144e-05
Candidatus Arthromitus sp. SFB-mouse	8.21812e-05	8.35929e-05	0.000100117	0.000110519	0.000125379	6.78101e-05	6.75603e-05	9.40775e-05	0.000113219	6.32274e-05	0.000106174	8.92589e-05	7.66142e-05	7.79013e-05	4.82218e-05	5.88017e-05	3.28158e-06	4.16581e-05	2.43127e-05	3.42549e-05
Mycolicibacterium aurum	8.21812e-05	0.00010831	0.00010976	0.000123298	0.000105207	0.000104569	0.000114206	6.38896e-05	7.87477e-05	9.17333e-05	9.69046e-05	7.85362e-05	7.56821e-05	7.80514e-05	6.17672e-05	7.1453e-05	8.86724e-06	3.00864e-05	3.17567e-05	3.52736e-05
Oscillatoria nigro-viridis	8.20025e-05	8.58146e-05	7.37406e-05	0.000105166	0.000113032	9.43299e-05	0.000101566	9.45566e-05	0.000109236	0.000102235	0.000109439	0.000109545	0.000124708	0.00010657	0.000144936	0.000108694	1.78043e-05	4.72126e-05	4.32301e-05	4.73711e-05
Methanobrevibacter smithii	8.18239e-05	8.97027e-05	7.95548e-05	7.68453e-05	8.99043e-05	0.00014032	0.000139183	0.000101425	8.53356e-05	0.00011531	0.000107438	8.92589e-05	0.000122098	0.00010612	0.000160243	0.000113149	1.53606e-05	7.91505e-05	4.65082e-05	5.23374e-05
Serratia marcescens	8.18239e-05	8.77586e-05	5.88507e-05	6.00947e-05	8.05139e-05	7.016e-05	7.40304e-05	7.10772e-05	6.75637e-05	5.70118e-05	7.06772e-05	7.37545e-05	6.09558e-05	8.84082e-05	5.06599e-05	7.51949e-05	1.08222e-05	3.0827e-05	3.35323e-05	4.6607e-05
Cupriavidus pinatubonensis	8.16452e-05	5.6932e-05	5.20439e-05	4.19627e-05	7.7036e-05	5.52216e-05	6.09397e-05	5.52645e-05	9.33022e-05	5.55115e-05	5.21389e-05	7.05667e-05	7.47501e-05	6.30415e-05	9.75272e-05	7.23439e-05	6.49334e-06	2.68464e-05	3.29177e-05	3.0562e-05
Halobacteriovorax marinus	8.16452e-05	8.22043e-05	4.66551e-05	5.23239e-05	5.75596e-05	6.78101e-05	6.59052e-05	5.71812e-05	4.33572e-05	4.4795e-05	4.03418e-05	4.98459e-05	7.82918e-05	8.2104e-05	9.84754e-05	7.28785e-05	9.77491e-06	2.12919e-05	1.68686e-05	2.30488e-05
Actinoplanes sp. OR16	8.12879e-05	8.55369e-05	8.86306e-05	9.20417e-05	7.65143e-05	8.19093e-05	7.43314e-05	9.02441e-05	9.0851e-05	9.77346e-05	9.84846e-05	7.66525e-05	7.73598e-05	7.73009e-05	6.88108e-05	8.08969e-05	4.74781e-06	2.57355e-05	2.602e-05	2.40676e-05
Arachidicoccus sp. BS20	8.12879e-05	7.33173e-05	7.00536e-05	4.95609e-05	6.79934e-05	9.41621e-05	9.88577e-05	0.000106696	7.32323e-05	4.86529e-05	4.6451e-05	7.69423e-05	3.20624e-05	2.56669e-05	3.04772e-05	3.63501e-05	4.57326e-05	3.777e-05	4.56887e-05	4.69891e-05
Chryseobacterium shandongense	8.11093e-05	8.47038e-05	8.82051e-05	6.85564e-05	6.90367e-05	6.8985e-05	5.74789e-05	6.99591e-05	6.05162e-05	3.62218e-05	5.39295e-05	5.8395e-05	5.72276e-05	5.10336e-05	6.2309e-05	5.66635e-05	4.30794e-05	5.51739e-05	6.0645e-05	8.58282e-05
Methanolobus psychrophilus	8.09306e-05	4.91559e-05	6.19705e-05	5.85406e-05	5.40817e-05	5.10254e-05	6.80117e-05	5.90979e-05	6.00566e-05	6.27987e-05	6.60426e-05	6.49156e-05	8.202e-05	6.24411e-05	9.15672e-05	7.23439e-05	1.35452e-05	1.49044e-05	1.65271e-05	2.5723e-05
Streptococcus pseudoporcinus	8.09306e-05	6.99847e-05	7.62932e-05	9.49773e-05	6.67761e-05	7.20063e-05	6.93659e-05	5.63826e-05	7.49176e-05	7.56585e-05	6.61479e-05	5.14398e-05	8.77987e-05	9.62133e-05	0.00012665	7.37694e-05	2.93247e-06	3.79552e-05	3.18933e-05	2.85245e-05
Streptomyces bingchenggensis	8.09306e-05	0.000105533	9.643e-05	7.64999e-05	0.000117032	9.65119e-05	7.94473e-05	7.68273e-05	8.24246e-05	9.66629e-05	8.82675e-05	7.303e-05	8.53754e-05	7.11468e-05	0.000103352	8.42824e-05	1.01938e-05	3.23082e-05	3.15518e-05	3.83298e-05
Gramella flava	8.0752e-05	6.05424e-05	5.74326e-05	5.23239e-05	3.47792e-05	3.55835e-05	4.12283e-05	5.59034e-05	2.29808e-05	2.70056e-05	3.09673e-05	2.65169e-05	4.0078e-05	4.98328e-05	4.57836e-05	4.45467e-05	3.34442e-05	2.92533e-05	2.43809e-05	3.34908e-05
Kozakia baliensis	8.0752e-05	4.94337e-05	3.40341e-05	6.2685e-05	5.99941e-05	4.31366e-05	4.18302e-05	4.42436e-05	7.24663e-05	8.20885e-05	6.54106e-05	7.1581e-05	3.37401e-05	5.4636e-05	2.32982e-05	3.22518e-05	5.51584e-06	3.43448e-05	1.76198e-05	1.93559e-05
Kyrpidia spormannii	8.0752e-05	4.66565e-05	6.29631e-05	4.62799e-05	5.37339e-05	5.13611e-05	4.25826e-05	4.12088e-05	4.70341e-05	4.4795e-05	4.57137e-05	4.49193e-05	6.31927e-05	0.000140943	8.95354e-05	9.76465e-05	7.88975e-06	3.62889e-05	3.45567e-05	3.60377e-05
Streptococcus parasanguinis	8.0752e-05	8.41483e-05	6.66502e-05	7.94356e-05	7.68621e-05	6.91529e-05	7.8695e-05	6.58063e-05	7.64496e-05	8.61607e-05	8.16316e-05	7.57831e-05	8.18336e-05	7.95524e-05	8.19499e-05	8.90935e-05	1.73156e-05	4.31393e-05	3.4147e-05	3.71837e-05
Campylobacter gracilis	8.05733e-05	7.52614e-05	0.000111462	9.48046e-05	7.40797e-05	8.81196e-05	9.34409e-05	0.000102223	0.000111227	9.73059e-05	8.31062e-05	0.000105198	4.25013e-05	4.96827e-05	4.55127e-05	3.99139e-05	3.05815e-05	2.54578e-05	3.37372e-05	4.95359e-05
Maribacter sp. HTCC2170	8.05733e-05	6.3875e-05	5.61563e-05	4.14446e-05	4.64303e-05	4.78363e-05	5.58238e-05	5.46256e-05	3.202e-05	2.5291e-05	2.9598e-05	2.98496e-05	3.52313e-05	3.81251e-05	2.26209e-05	3.38555e-05	2.65319e-05	2.80498e-05	3.12786e-05	3.08167e-05
Cupriavidus necator	8.03947e-05	8.88695e-05	8.05475e-05	7.90902e-05	0.000102773	0.000102722	0.000122331	9.90289e-05	0.000118581	0.000125383	0.00013198	0.000103894	8.48162e-05	9.51626e-05	9.3599e-05	8.55298e-05	1.76647e-05	4.10101e-05	3.85861e-05	4.87718e-05
Myxococcus fulvus	8.03947e-05	7.63722e-05	6.63666e-05	6.37211e-05	6.0168e-05	6.49567e-05	5.73285e-05	5.47853e-05	6.77169e-05	7.20149e-05	6.80439e-05	7.99853e-05	7.86647e-05	9.77143e-05	8.43881e-05	0.000103527	8.7276e-06	2.97161e-05	2.97762e-05	4.04946e-05
Halobacillus litoralis	8.0216e-05	6.69299e-05	8.40927e-05	8.3062e-05	7.06018e-05	8.57697e-05	7.58361e-05	6.43688e-05	6.06694e-05	8.03738e-05	7.67864e-05	6.07134e-05	9.20861e-05	0.000105519	8.41172e-05	0.000113683	2.70207e-05	3.43448e-05	5.32693e-05	5.29741e-05
Massilia putida	8.0216e-05	8.4426e-05	0.000100401	6.56207e-05	8.34701e-05	8.77839e-05	8.8024e-05	7.49106e-05	7.55304e-05	6.64423e-05	8.00516e-05	7.07116e-05	8.38841e-05	8.43555e-05	8.19499e-05	0.000107625	2.339e-05	3.65666e-05	4.30935e-05	5.25921e-05
Gluconobacter oxydans	7.98587e-05	4.11021e-05	7.48751e-05	5.80225e-05	5.28644e-05	5.20325e-05	4.86013e-05	3.91324e-05	4.65745e-05	4.4795e-05	4.65564e-05	4.04273e-05	5.66684e-05	5.71876e-05	3.84691e-05	5.68416e-05	1.37547e-05	2.91607e-05	3.32592e-05	4.38055e-05
Ralstonia solanacearum	7.98587e-05	7.22065e-05	8.56526e-05	7.7536e-05	9.65123e-05	8.45948e-05	9.62998e-05	7.0598e-05	9.59067e-05	6.47277e-05	7.26785e-05	0.000100706	7.26996e-05	8.82581e-05	6.55599e-05	8.01841e-05	2.4158e-05	5.43407e-05	3.96788e-05	4.86445e-05
Tetragenococcus koreensis	7.98587e-05	8.41483e-05	0.000113305	0.000131241	0.000107989	0.000122025	0.000106682	0.000107015	9.89709e-05	0.000144244	0.000113547	0.000103169	0.000114642	0.000140342	0.000126379	0.000124196	1.80138e-05	5.64699e-05	5.35425e-05	7.27121e-05
Methylovulum psychrotolerans	7.968e-05	0.000111365	8.6078e-05	0.000102057	6.45154e-05	7.97272e-05	7.31276e-05	5.87784e-05	5.79117e-05	7.28723e-05	6.02494e-05	5.68011e-05	7.82918e-05	6.06399e-05	6.48827e-05	7.66204e-05	1.31961e-05	1.62004e-05	2.12394e-05	3.15807e-05
Bacillus pumilus	7.95014e-05	7.88717e-05	7.00536e-05	7.18374e-05	6.46893e-05	7.26777e-05	5.67266e-05	7.523e-05	7.50708e-05	8.44461e-05	6.97292e-05	7.70872e-05	8.94764e-05	6.30415e-05	8.54717e-05	6.52164e-05	1.07524e-05	2.8883e-05	2.49956e-05	4.1386e-05
Chlorobium chlorochromatii	7.91441e-05	9.7201e-05	7.2748e-05	7.30462e-05	7.25147e-05	7.97272e-05	8.45632e-05	7.95426e-05	7.98201e-05	7.48012e-05	6.63586e-05	7.65076e-05	6.8785e-05	8.87084e-05	6.12254e-05	8.25006e-05	2.18539e-05	2.76795e-05	2.88883e-05	2.86519e-05
Coprothermobacter proteolyticus	7.89654e-05	0.000100534	0.00010423	0.00010413	0.000115467	0.000104065	8.3209e-05	9.58344e-05	0.000101882	0.000127526	9.5114e-05	0.000104039	8.89172e-05	8.64569e-05	0.00010877	9.44391e-05	7.75011e-06	3.32339e-05	2.96396e-05	4.21501e-05
Dactylococcopsis salina	7.89654e-05	8.30374e-05	6.70756e-05	7.30462e-05	5.58206e-05	5.0354e-05	5.92845e-05	6.18132e-05	5.9597e-05	8.44461e-05	7.13092e-05	8.14343e-05	6.65481e-05	5.64372e-05	7.1249e-05	8.25006e-05	6.84244e-06	1.6941e-05	1.7893e-05	2.55957e-05
Melittangium boletus	7.89654e-05	0.000109421	8.69289e-05	0.00011121	0.000119293	0.000114472	0.000106833	0.000120272	0.000112606	9.40909e-05	0.000116286	0.000117804	7.06491e-05	8.2104e-05	5.66199e-05	8.26788e-05	4.94331e-05	6.99857e-05	6.32402e-05	6.5963e-05
Geodermatophilus obscurus	7.87868e-05	6.41527e-05	4.46698e-05	3.79909e-05	5.70379e-05	5.3711e-05	5.26639e-05	5.6702e-05	5.5154e-05	7.93022e-05	6.52e-05	5.14398e-05	5.85325e-05	6.46926e-05	6.78627e-05	6.80674e-05	2.86265e-06	2.194e-05	1.70052e-05	2.20301e-05
Kiritimatiella glycovorans	7.87868e-05	9.02581e-05	8.02638e-05	7.61545e-05	8.76436e-05	7.98951e-05	8.12529e-05	9.98275e-05	9.82048e-05	7.18006e-05	9.2586e-05	8.14343e-05	8.1088e-05	0.000112124	8.92645e-05	9.533e-05	9.28617e-06	4.48056e-05	3.48299e-05	4.36782e-05
Streptomyces hygroscopicus	7.87868e-05	0.0001022	7.78531e-05	0.000102748	0.000140508	0.000126389	0.000110895	9.05635e-05	0.000110002	9.47339e-05	0.000114916	9.51998e-05	8.64938e-05	0.000102818	9.64435e-05	9.39045e-05	7.0519e-06	8.165e-05	6.0167e-05	6.16333e-05
Croceibacter atlanticus	7.86081e-05	7.13733e-05	5.70072e-05	4.24808e-05	3.40836e-05	5.65644e-05	5.20621e-05	6.18132e-05	3.50841e-05	1.84324e-05	2.52795e-05	3.56456e-05	1.75225e-05	2.97196e-05	1.39518e-05	1.83533e-05	9.35599e-06	1.74038e-05	1.57076e-05	1.80825e-05
Leptospira biflexa	7.86081e-05	0.000124417	0.00010423	8.53069e-05	0.000128509	0.000126557	8.75726e-05	0.000102543	0.000119347	9.1519e-05	9.03741e-05	9.30263e-05	6.80393e-05	0.000117527	7.65317e-05	9.337e-05	2.00386e-05	2.39766e-05	2.66346e-05	4.43149e-05
Paenibacillus sp. Y412MC10	7.86081e-05	7.33173e-05	6.05524e-05	8.54796e-05	0.000100338	7.85523e-05	7.98987e-05	8.86468e-05	9.78984e-05	7.86592e-05	8.30009e-05	9.23018e-05	0.000135147	0.000189275	0.000136403	0.000151281	6.35369e-06	2.96236e-05	2.19224e-05	3.06893e-05
Vibrio vulnificus	7.84295e-05	6.7763e-05	7.18971e-05	7.23555e-05	6.26026e-05	7.09992e-05	8.0952e-05	6.43688e-05	5.53072e-05	9.53769e-05	4.63457e-05	6.33217e-05	5.27538e-05	7.08466e-05	5.87872e-05	5.27433e-05	5.44602e-05	4.86012e-05	4.63033e-05	5.47569e-05
Riemerella anatipestifer	7.82508e-05	9.10912e-05	6.16869e-05	5.04243e-05	5.75596e-05	8.81196e-05	8.71212e-05	0.000114842	4.41232e-05	3.75078e-05	3.2442e-05	6.10032e-05	4.75343e-05	5.32851e-05	3.68436e-05	4.16958e-05	1.03335e-05	2.48097e-05	2.2059e-05	2.38129e-05
Wenyingzhuangia fucanilytica	7.82508e-05	9.1369e-05	6.40976e-05	6.30304e-05	6.08636e-05	9.88618e-05	0.000103071	0.000122029	5.80649e-05	4.2866e-05	4.7399e-05	6.10032e-05	2.55381e-05	2.02633e-05	3.41345e-05	1.44331e-05	8.23886e-06	2.36063e-05	2.04882e-05	2.66144e-05
Leptolyngbya boryana	7.80721e-05	9.1369e-05	7.77113e-05	6.99378e-05	7.87749e-05	6.36139e-05	7.41809e-05	6.58063e-05	6.75637e-05	9.60199e-05	7.6997e-05	5.85399e-05	8.53754e-05	6.85952e-05	0.000127327	6.84238e-05	8.30868e-06	3.3882e-05	2.84103e-05	2.94159e-05
Tolumonas auensis	7.80721e-05	6.7763e-05	6.36722e-05	4.71433e-05	4.10395e-05	4.86756e-05	6.54538e-05	5.94173e-05	4.96386e-05	4.15801e-05	4.84523e-05	4.73826e-05	8.64938e-05	8.2104e-05	6.66436e-05	6.71765e-05	1.10317e-05	3.32339e-05	2.69078e-05	3.1326e-05
Virgibacillus sp. 6R	7.80721e-05	8.94249e-05	0.000114582	8.99694e-05	9.09476e-05	0.0001138	0.000105027	0.000101584	0.000101575	0.000114667	0.000107332	9.23018e-05	0.000186782	0.0001519	0.00017433	0.000167496	2.81378e-05	6.34129e-05	6.12597e-05	8.91391e-05
Chloroflexus aurantiacus	7.78935e-05	6.7763e-05	9.31684e-05	8.08171e-05	8.55569e-05	9.18122e-05	8.50146e-05	6.7723e-05	6.38868e-05	6.92286e-05	6.99399e-05	6.62197e-05	7.23267e-05	6.61936e-05	7.82926e-05	7.84023e-05	1.20092e-05	3.72146e-05	3.03908e-05	4.30415e-05
Flavobacterium johnsoniae	7.77148e-05	7.44282e-05	7.06208e-05	6.07855e-05	5.00821e-05	7.04957e-05	6.89145e-05	6.5966e-05	4.85662e-05	3.47215e-05	3.86565e-05	4.88316e-05	1.77089e-05	1.72614e-05	2.50591e-05	1.60368e-05	3.39329e-05	4.19359e-05	3.59909e-05	3.90939e-05
Lentzea guizhouensis	7.75362e-05	7.41505e-05	6.33886e-05	6.18216e-05	6.71239e-05	5.79072e-05	7.58361e-05	5.207e-05	5.80649e-05	5.42255e-05	6.30933e-05	5.56419e-05	5.61091e-05	6.12403e-05	6.39345e-05	6.53946e-05	6.98208e-06	2.55503e-05	2.58151e-05	2.91612e-05
Sphingomonas sanxanigenens	7.75362e-05	9.27576e-05	9.01905e-05	0.000104475	8.72958e-05	0.000100708	9.88577e-05	0.000122349	0.000123943	0.000119596	0.000112494	0.000143452	5.38722e-05	3.28716e-05	6.21736e-05	4.45467e-05	8.44832e-06	2.71241e-05	1.88491e-05	2.33035e-05
Achromobacter xylosoxidans	7.73575e-05	8.4426e-05	0.000116141	8.13351e-05	9.94686e-05	9.71833e-05	9.79549e-05	9.20011e-05	9.78984e-05	8.57321e-05	8.19476e-05	8.37527e-05	0.000107185	7.45991e-05	8.60135e-05	9.40827e-05	1.38943e-05	4.15656e-05	3.68104e-05	4.20227e-05
Elizabethkingia meningoseptica	7.73575e-05	6.66521e-05	3.06307e-05	2.29672e-05	2.41716e-05	4.49829e-05	5.02564e-05	4.90353e-05	3.8761e-05	2.12187e-05	2.16982e-05	3.60803e-05	1.04389e-05	1.0657e-05	1.11073e-05	1.12258e-05	2.65319e-06	1.66633e-05	1.03807e-05	8.53189e-06
Weeksella virosa	7.73575e-05	7.33173e-05	5.92761e-05	3.33284e-05	5.28644e-05	8.8791e-05	8.30586e-05	9.29594e-05	4.58085e-05	3.00062e-05	2.43315e-05	4.81071e-05	1.75225e-05	1.99631e-05	2.46527e-05	1.65714e-05	2.03877e-05	2.61983e-05	2.77956e-05	3.03073e-05
Deinococcus sp. NW-56	7.71789e-05	6.16532e-05	7.40242e-05	9.42866e-05	4.97343e-05	4.76685e-05	4.51405e-05	4.632e-05	5.86778e-05	5.01533e-05	4.53977e-05	5.30337e-05	0.000120234	0.000129835	7.09781e-05	9.31918e-05	1.59191e-05	3.50854e-05	3.47616e-05	4.24048e-05
Bacillus cytotoxicus	7.70002e-05	0.000102755	9.33103e-05	0.000101021	9.28605e-05	0.000111282	9.79549e-05	0.000125703	8.80933e-05	0.00012624	0.000120393	0.0001023	0.000204677	0.000155352	0.000225802	0.000210973	2.04575e-05	7.86876e-05	5.204e-05	4.6607e-05
Flavobacterium sp. 140616W15	7.70002e-05	6.63744e-05	4.66551e-05	3.47099e-05	3.6866e-05	5.65644e-05	6.03378e-05	6.3091e-05	2.66578e-05	2.0147e-05	2.35942e-05	2.65169e-05	1.21166e-05	1.39592e-05	1.97763e-05	9.26572e-06	3.3514e-06	1.87924e-05	1.27027e-05	1.24795e-05
Hymenobacter sp. PAMC 26628	7.70002e-05	7.91494e-05	6.60829e-05	5.88859e-05	5.39078e-05	5.69001e-05	6.30463e-05	7.0598e-05	5.8831e-05	4.75813e-05	5.78268e-05	5.86848e-05	5.12625e-05	4.81817e-05	5.67554e-05	5.41688e-05	6.98208e-06	1.74038e-05	1.48198e-05	1.64271e-05
Geobacter pickeringii	7.68216e-05	7.35951e-05	7.62932e-05	8.40981e-05	8.81653e-05	8.07343e-05	8.42623e-05	8.64107e-05	9.34555e-05	7.71589e-05	7.62597e-05	9.14324e-05	6.20742e-05	6.51429e-05	7.53126e-05	6.73547e-05	8.7276e-06	3.98067e-05	3.07323e-05	3.04346e-05
Planctopirus limnophila	7.68216e-05	8.77586e-05	0.000101961	8.53069e-05	9.25127e-05	8.72803e-05	8.99801e-05	8.81677e-05	7.73689e-05	8.74467e-05	8.60555e-05	9.02732e-05	9.73056e-05	7.82015e-05	9.12963e-05	9.71119e-05	4.16132e-05	5.63773e-05	5.91426e-05	7.05472e-05
Thermodesulfatator indicus	7.68216e-05	7.22065e-05	7.54423e-05	6.89017e-05	9.12954e-05	7.93915e-05	7.82436e-05	5.71812e-05	6.41932e-05	6.72997e-05	6.1724e-05	6.94075e-05	8.22064e-05	7.33983e-05	7.17908e-05	6.82456e-05	1.81534e-05	3.61037e-05	3.79714e-05	5.17007e-05
Aquimarina sp. AD10	7.66429e-05	6.44304e-05	5.4171e-05	5.50868e-05	7.28625e-05	7.09992e-05	7.10211e-05	7.65078e-05	6.08226e-05	6.40847e-05	6.08814e-05	5.31786e-05	5.77868e-05	5.50863e-05	6.47472e-05	5.57725e-05	4.95728e-06	1.97182e-05	1.96687e-05	1.68091e-05
Gramella forsetii	7.61069e-05	7.99826e-05	5.53055e-05	6.64841e-05	5.46034e-05	5.72358e-05	7.05697e-05	6.58063e-05	4.71873e-05	6.5585e-05	4.36071e-05	4.91214e-05	3.82139e-05	5.10336e-05	4.21263e-05	4.36558e-05	3.32347e-05	2.84201e-05	3.67422e-05	3.70564e-05
Cardiobacterium hominis	7.59283e-05	6.3875e-05	6.69338e-05	6.95925e-05	7.96444e-05	7.75452e-05	8.11025e-05	5.94173e-05	6.64913e-05	8.03738e-05	6.58319e-05	6.11481e-05	7.00898e-05	6.81449e-05	7.36872e-05	7.12748e-05	1.53606e-05	2.83275e-05	3.10738e-05	4.1386e-05
Deinococcus peraridilitoris	7.59283e-05	8.30374e-05	6.46649e-05	7.77087e-05	8.10356e-05	8.22449e-05	8.8024e-05	7.17161e-05	7.47644e-05	7.20149e-05	8.0789e-05	6.85381e-05	5.29402e-05	5.9289e-05	6.00063e-05	4.98924e-05	1.06826e-05	3.44374e-05	2.43809e-05	3.50189e-05
Stackebrandtia nassauensis	7.59283e-05	8.77586e-05	7.11881e-05	5.54322e-05	7.92966e-05	9.86939e-05	8.33595e-05	8.27371e-05	8.31907e-05	7.75875e-05	7.46798e-05	8.59262e-05	6.33791e-05	7.70007e-05	6.31218e-05	6.96711e-05	1.03335e-05	2.53652e-05	2.70444e-05	2.83972e-05
Actinoplanes teichomyceticus	7.57496e-05	7.77608e-05	7.55841e-05	5.59503e-05	8.17312e-05	7.11671e-05	8.00492e-05	7.26744e-05	8.13522e-05	6.98716e-05	7.48904e-05	7.28851e-05	8.1088e-05	5.82383e-05	6.81336e-05	7.27003e-05	1.00542e-05	2.46246e-05	2.66346e-05	3.43822e-05
Pseudanabaena sp. ABRG5-3	7.57496e-05	9.05358e-05	9.00486e-05	0.000102576	8.97304e-05	9.55048e-05	0.000100814	0.000106057	0.000103567	0.000104593	0.000105436	0.000113892	9.93561e-05	9.77143e-05	9.88817e-05	0.000102101	1.88516e-05	4.68423e-05	4.41862e-05	5.38655e-05
Streptococcus urinalis	7.57496e-05	6.44304e-05	6.35304e-05	6.85564e-05	7.12974e-05	7.2342e-05	7.04192e-05	5.52645e-05	6.31207e-05	6.32274e-05	5.45615e-05	5.20194e-05	7.30724e-05	7.83516e-05	7.1249e-05	6.75329e-05	1.15204e-05	2.78647e-05	2.86152e-05	3.59103e-05
Bacillus simplex	7.5571e-05	8.2482e-05	6.55157e-05	8.9106e-05	8.29484e-05	7.73774e-05	8.72717e-05	6.62855e-05	7.1547e-05	8.16598e-05	5.88801e-05	6.79585e-05	8.89172e-05	8.99092e-05	9.10254e-05	8.35697e-05	1.81534e-05	2.98087e-05	3.50348e-05	4.31688e-05
Geobacter metallireducens	7.5571e-05	9.02581e-05	0.000108767	8.9106e-05	0.000100338	0.000105408	9.46446e-05	9.93484e-05	9.28426e-05	8.40174e-05	9.74313e-05	8.92589e-05	0.00012098	0.000117227	0.000109854	0.000128829	1.50813e-05	3.17528e-05	3.28494e-05	3.90939e-05
Sinorhizobium meliloti	7.5571e-05	0.000106366	7.81367e-05	9.15236e-05	0.000101729	0.00010054	8.65193e-05	0.000103821	0.00010847	0.000101807	9.81686e-05	0.000108241	6.24471e-05	7.32482e-05	7.88345e-05	7.37694e-05	8.3785e-06	4.8416e-05	3.51714e-05	3.50189e-05
Bifidobacterium kashiwanohense	7.53923e-05	0.000104144	6.90609e-05	9.41139e-05	9.00782e-05	0.000108429	7.88454e-05	0.000136404	0.00011567	0.000116167	0.000112178	0.000114617	0.00017597	0.000200232	0.000229866	0.000201886	7.75011e-06	5.43407e-05	3.72202e-05	4.59703e-05
Burkholderia cenocepacia	7.52137e-05	9.38684e-05	8.6078e-05	7.77087e-05	7.44275e-05	8.02308e-05	8.01997e-05	8.51329e-05	5.80649e-05	9.75202e-05	9.76419e-05	5.60766e-05	0.00013757	0.00012143	0.000164848	0.000140768	2.47166e-05	6.58199e-05	5.37474e-05	5.1064e-05
Flaviflexus sp. H23T48	7.52137e-05	8.97027e-05	8.66452e-05	0.000125543	3.06057e-05	6.91529e-05	6.50023e-05	2.65142e-05	2.81898e-05	2.4005e-05	2.77021e-05	3.01394e-05	4.101e-05	3.032e-05	4.60545e-05	3.6172e-05	5.09692e-06	1.40712e-05	2.04882e-05	1.85919e-05
Methanobrevibacter millerae	7.52137e-05	9.74787e-05	8.72125e-05	0.000124161	0.000131987	0.000105911	0.000107133	0.000111967	0.00012042	0.000146173	0.000123343	0.000130556	8.05287e-05	8.16538e-05	9.71208e-05	8.44606e-05	7.95957e-06	3.80478e-05	2.87518e-05	3.28541e-05
Rubrobacter radiotolerans	7.52137e-05	8.16489e-05	6.3814e-05	7.7536e-05	8.20789e-05	8.50983e-05	7.1322e-05	7.93829e-05	8.45695e-05	7.43726e-05	8.1421e-05	8.69405e-05	6.13286e-05	7.26478e-05	6.47472e-05	7.98278e-05	7.54065e-06	5.41556e-05	3.4147e-05	3.89665e-05
Virgibacillus phasianinus	7.52137e-05	6.55413e-05	8.36672e-05	9.04875e-05	9.33822e-05	0.000105744	8.77231e-05	6.5966e-05	7.1547e-05	7.63015e-05	6.4884e-05	6.39013e-05	6.52432e-05	7.68506e-05	7.30099e-05	6.75329e-05	2.96738e-05	4.82309e-05	6.16012e-05	8.02252e-05
Pseudodesulfovibrio profundus	7.5035e-05	9.99782e-05	7.6435e-05	8.56523e-05	8.15573e-05	0.000100708	8.45632e-05	8.14593e-05	8.59484e-05	9.51626e-05	8.50022e-05	7.91158e-05	7.66142e-05	6.58934e-05	8.20854e-05	6.25436e-05	9.63527e-06	3.5826e-05	2.24004e-05	2.41949e-05
Cloacibacterium normanense	7.48564e-05	7.22065e-05	7.35988e-05	5.07697e-05	7.14713e-05	9.13087e-05	0.00010924	0.000104939	7.03214e-05	4.99389e-05	4.95056e-05	6.59299e-05	1.67768e-05	2.44661e-05	2.27563e-05	2.54807e-05	9.56545e-06	2.61983e-05	2.29468e-05	2.31762e-05
Veillonella dispar	7.48564e-05	8.80364e-05	8.57944e-05	0.000114145	0.000114076	7.92237e-05	7.6137e-05	8.22579e-05	7.61432e-05	0.000109308	0.000106384	7.70872e-05	8.1088e-05	9.05096e-05	6.96236e-05	9.47955e-05	9.63527e-06	4.66571e-05	3.14835e-05	3.59103e-05
Kitasatospora setae	7.43204e-05	0.000111642	9.37357e-05	8.0299e-05	9.77296e-05	8.52662e-05	9.26885e-05	9.21608e-05	9.06978e-05	0.000100092	9.385e-05	8.41874e-05	9.45094e-05	9.29112e-05	7.49063e-05	0.000102992	1.48718e-05	2.94384e-05	3.60592e-05	4.63523e-05
Klebsiella pneumoniae	7.43204e-05	7.69277e-05	8.13983e-05	6.45846e-05	8.83392e-05	0.000107254	0.00012203	9.75914e-05	9.17702e-05	9.60199e-05	8.85835e-05	9.21569e-05	6.31927e-05	9.59131e-05	8.73681e-05	9.35482e-05	7.40101e-06	2.48097e-05	2.84103e-05	3.31088e-05
Leptolyngbya sp. NIES-3755	7.43204e-05	7.49836e-05	5.37456e-05	5.85406e-05	6.66022e-05	6.52924e-05	5.02564e-05	5.207e-05	6.71041e-05	5.82978e-05	6.80439e-05	5.76705e-05	7.00898e-05	6.28914e-05	8.33045e-05	7.46603e-05	4.25907e-06	3.28636e-05	2.13077e-05	2.5341e-05
Amycolatopsis sp. AA4	7.41417e-05	6.69299e-05	7.11881e-05	3.8509e-05	6.72978e-05	7.6706e-05	6.87641e-05	7.10772e-05	5.3622e-05	6.77283e-05	6.28827e-05	5.73807e-05	6.09558e-05	5.3135e-05	7.59899e-05	6.68201e-05	3.7005e-05	4.6472e-05	5.32693e-05	6.40528e-05
Brachyspira hampsonii	7.41417e-05	7.44282e-05	7.84203e-05	0.000128133	0.000129379	9.14765e-05	0.000107886	8.30565e-05	0.000107091	9.43053e-05	0.000123027	9.85326e-05	0.00010588	0.000101617	7.51772e-05	9.72901e-05	1.50115e-05	9.21108e-05	6.49476e-05	7.30941e-05
Deferribacter desulfuricans	7.41417e-05	0.000101089	0.00010976	9.58408e-05	0.000120858	0.000113129	0.000110143	0.000118835	0.000107244	0.000121097	9.701e-05	9.78081e-05	6.37519e-05	5.89888e-05	5.45881e-05	6.48601e-05	1.42434e-05	2.65686e-05	2.54736e-05	3.20901e-05
Rhodospirillum rubrum	7.41417e-05	8.38706e-05	6.86355e-05	9.7913e-05	7.68621e-05	7.58668e-05	6.31967e-05	6.69244e-05	8.13522e-05	7.22293e-05	7.37318e-05	7.4479e-05	6.09558e-05	6.12403e-05	6.6779e-05	5.00705e-05	3.07212e-05	5.33224e-05	4.63716e-05	4.38055e-05
Desulfohalobium retbaense	7.39631e-05	5.97092e-05	4.97749e-05	3.83363e-05	4.46913e-05	4.76685e-05	4.54415e-05	4.40838e-05	3.78418e-05	5.22966e-05	4.03418e-05	3.33272e-05	7.71734e-05	6.5293e-05	7.24681e-05	7.03839e-05	1.22885e-05	2.65686e-05	2.56102e-05	3.68017e-05
Xenorhabdus bovienii	7.36058e-05	0.000104422	9.51538e-05	0.000148683	0.000123118	7.70417e-05	6.87641e-05	0.000207641	0.000237469	0.000282273	0.000192335	0.000195761	2.55381e-05	3.15208e-05	3.50827e-05	2.97572e-05	1.44529e-05	2.76795e-05	3.29177e-05	4.01126e-05
Methanobrevibacter sp. YE315	7.34271e-05	5.41549e-05	4.60879e-05	4.54164e-05	5.99941e-05	5.42145e-05	5.59742e-05	4.32852e-05	3.81482e-05	4.50093e-05	3.92885e-05	3.89783e-05	6.07694e-05	5.80882e-05	3.31863e-05	4.63286e-05	6.84244e-06	1.98108e-05	1.31807e-05	2.17754e-05
Kosmotoga olearia	7.30698e-05	6.66521e-05	8.19655e-05	0.000101885	0.000125901	0.000130585	0.000126845	0.000103661	0.000109695	0.000102235	0.000104488	0.000113457	0.000109422	9.78644e-05	7.35517e-05	9.46173e-05	2.2971e-05	6.95228e-05	6.00304e-05	7.06746e-05
Nautilia profundicola	7.30698e-05	7.99826e-05	5.7858e-05	4.66252e-05	5.61684e-05	7.8888e-05	9.01306e-05	5.89382e-05	3.53905e-05	4.07227e-05	5.32975e-05	4.81071e-05	6.11422e-05	5.38855e-05	6.43408e-05	4.6685e-05	3.79825e-05	3.93438e-05	3.91324e-05	6.02326e-05
Paenisporosarcina sp. K2R23-3	7.30698e-05	9.1369e-05	8.94814e-05	8.09898e-05	6.62544e-05	8.92945e-05	8.72717e-05	7.77856e-05	7.18535e-05	7.78018e-05	7.62597e-05	7.4479e-05	0.000101407	9.77143e-05	0.000104435	9.94283e-05	3.25365e-05	4.22136e-05	5.93475e-05	7.76784e-05
Pseudoxanthomonas suwonensis	7.30698e-05	7.77608e-05	7.62932e-05	6.8729e-05	6.1907e-05	5.35431e-05	6.44005e-05	5.57437e-05	7.32323e-05	5.63688e-05	6.04601e-05	6.98422e-05	5.59227e-05	6.30415e-05	5.37754e-05	7.09184e-05	6.07441e-06	3.85106e-05	3.46933e-05	3.96032e-05
Gilliamella apicola	7.28912e-05	6.91516e-05	6.86355e-05	6.2685e-05	5.99941e-05	6.62995e-05	5.61247e-05	6.66049e-05	7.18535e-05	7.97308e-05	6.18294e-05	5.6946e-05	0.000103643	9.08098e-05	7.81572e-05	8.26788e-05	1.52209e-05	2.67538e-05	2.39712e-05	3.34908e-05
Muricauda ruestringensis	7.28912e-05	6.33195e-05	5.44546e-05	5.85406e-05	5.54728e-05	4.76685e-05	4.90527e-05	6.88411e-05	5.20899e-05	4.2223e-05	4.59244e-05	5.30337e-05	1.43535e-05	2.49164e-05	1.65254e-05	1.88878e-05	2.339e-05	1.90702e-05	2.57468e-05	2.54683e-05
Sphingosinicella sp. BN140058	7.28912e-05	9.05358e-05	9.00486e-05	0.000112073	9.28605e-05	8.27485e-05	7.76417e-05	9.47164e-05	0.000117968	0.000106951	9.385e-05	9.7953e-05	7.71734e-05	0.000107471	8.43881e-05	8.83807e-05	6.21405e-06	4.15656e-05	3.16201e-05	3.06893e-05
Streptomyces scabiei	7.28912e-05	6.88739e-05	8.15401e-05	6.47573e-05	7.63404e-05	5.85785e-05	5.37172e-05	4.79172e-05	3.89142e-05	4.90816e-05	4.49764e-05	3.63701e-05	5.48043e-05	5.32851e-05	6.40699e-05	6.87802e-05	2.40882e-05	3.06419e-05	3.94739e-05	3.97306e-05
Variovorax boronicumulans	7.28912e-05	7.63722e-05	3.1907e-05	5.78498e-05	4.05178e-05	3.23944e-05	4.24321e-05	2.90698e-05	3.3552e-05	3.45072e-05	3.34953e-05	3.53558e-05	4.08236e-05	4.14273e-05	4.768e-05	4.15176e-05	7.68029e-06	1.8237e-05	2.06248e-05	2.012e-05
Lactobacillus farciminis	7.27125e-05	8.91472e-05	7.67186e-05	7.27008e-05	6.29504e-05	7.15027e-05	8.18548e-05	5.68618e-05	5.69925e-05	7.65159e-05	6.03547e-05	4.98459e-05	5.38722e-05	5.52364e-05	5.83808e-05	5.54162e-05	8.51814e-06	2.59206e-05	2.33565e-05	3.47643e-05
Aquifex aeolicus	7.25338e-05	7.49836e-05	8.52271e-05	9.42866e-05	8.20789e-05	7.26777e-05	7.55351e-05	7.77856e-05	7.85945e-05	9.64486e-05	8.66875e-05	8.12894e-05	9.24589e-05	8.46557e-05	9.45472e-05	0.000100497	1.19394e-05	4.59165e-05	3.46933e-05	4.44422e-05
Fictibacillus arsenicus	7.25338e-05	6.5819e-05	6.3814e-05	6.64841e-05	6.74717e-05	7.6706e-05	8.38109e-05	7.31536e-05	7.46112e-05	6.45134e-05	6.28827e-05	7.1581e-05	8.53754e-05	8.54062e-05	8.3169e-05	8.07187e-05	1.68966e-05	2.91607e-05	3.1825e-05	4.29141e-05
Leptotrichia sp. oral taxon 847	7.23552e-05	6.85962e-05	0.0001082	6.23397e-05	9.25127e-05	8.69447e-05	8.60679e-05	8.06606e-05	8.02798e-05	0.00011531	7.64704e-05	7.72321e-05	5.55499e-05	4.08269e-05	5.49945e-05	6.05836e-05	1.78741e-05	2.94384e-05	3.5786e-05	4.5461e-05
Lysinibacillus sp. 2017	7.23552e-05	8.33152e-05	9.95498e-05	9.91218e-05	0.00012051	0.000113464	0.000114958	8.27371e-05	8.70208e-05	0.000115738	8.68982e-05	0.000112153	8.33249e-05	7.50494e-05	9.67144e-05	8.32133e-05	1.68966e-05	3.89735e-05	2.99128e-05	4.24048e-05
Methanosphaera stadtmanae	7.23552e-05	6.47081e-05	6.70756e-05	5.57776e-05	6.20809e-05	6.0257e-05	6.07892e-05	5.8459e-05	7.70624e-05	7.30866e-05	6.00387e-05	6.82483e-05	6.4684e-05	7.80514e-05	7.82926e-05	7.16312e-05	2.79283e-06	1.7589e-05	1.43417e-05	1.94833e-05
Caldisericum exile	7.21765e-05	7.94271e-05	6.39558e-05	6.83837e-05	9.92947e-05	8.62733e-05	8.51651e-05	8.56121e-05	8.31907e-05	9.43053e-05	8.0473e-05	8.41874e-05	7.32588e-05	8.79579e-05	8.34399e-05	8.05405e-05	1.08222e-05	3.36042e-05	3.31226e-05	3.46369e-05
Frankia alni	7.19979e-05	8.77586e-05	7.3457e-05	5.95767e-05	8.72958e-05	6.74744e-05	5.67266e-05	5.59034e-05	7.82881e-05	7.28723e-05	6.90972e-05	6.36115e-05	6.74801e-05	7.47492e-05	8.19499e-05	7.51949e-05	6.21405e-06	4.3417e-05	2.73176e-05	3.0562e-05
Nostoc flagelliforme	7.19979e-05	7.47059e-05	6.87773e-05	7.83995e-05	5.09516e-05	5.67322e-05	5.17611e-05	5.98965e-05	6.41932e-05	6.4299e-05	5.51935e-05	6.65095e-05	2.70293e-05	3.72245e-05	3.34572e-05	3.047e-05	3.49104e-06	1.45341e-05	9.90263e-06	1.59177e-05
Staphylococcus delphini	7.19979e-05	2.11065e-05	5.91343e-05	2.34853e-05	2.46932e-05	2.9541e-05	4.31844e-05	2.22016e-05	1.36353e-05	2.2719e-05	3.42326e-05	2.08657e-05	4.86528e-05	5.50863e-05	3.64372e-05	5.34561e-05	9.21635e-06	2.96236e-05	2.43127e-05	1.89739e-05
Streptomyces sp. RTd22	7.18192e-05	8.10934e-05	9.34521e-05	8.11624e-05	7.80793e-05	9.80225e-05	9.73531e-05	7.81051e-05	8.13522e-05	7.15863e-05	7.34158e-05	7.40443e-05	8.1088e-05	9.78644e-05	9.19735e-05	9.47955e-05	1.50115e-05	2.69389e-05	3.08689e-05	3.31088e-05
Pseudanabaena sp. PCC 7367	7.16406e-05	6.02646e-05	5.30365e-05	4.57618e-05	6.38199e-05	5.5893e-05	5.08583e-05	5.31881e-05	4.97918e-05	5.25109e-05	4.82416e-05	5.02806e-05	7.73598e-05	6.66439e-05	7.46354e-05	6.34346e-05	8.93706e-06	2.41617e-05	2.19224e-05	2.83972e-05
Pseudodesulfovibrio indicus	7.16406e-05	5.33217e-05	6.7501e-05	5.57776e-05	6.06897e-05	6.99921e-05	5.77799e-05	4.96742e-05	5.57669e-05	4.4795e-05	4.78203e-05	4.41948e-05	5.36858e-05	3.85754e-05	3.95527e-05	4.54377e-05	1.50813e-05	3.11047e-05	3.45567e-05	4.78804e-05
Carnobacterium inhibens	7.14619e-05	8.2482e-05	6.43812e-05	8.15078e-05	0.000111815	0.000101044	0.000118569	8.52926e-05	8.30375e-05	9.13046e-05	9.5746e-05	8.95487e-05	0.000106067	9.15603e-05	9.86108e-05	8.1966e-05	1.7525e-05	5.56368e-05	4.38447e-05	6.1124e-05
Desulfovibrio ferrophilus	7.14619e-05	7.8594e-05	9.30266e-05	7.44277e-05	8.26006e-05	8.59376e-05	9.16353e-05	7.85842e-05	6.61848e-05	7.60872e-05	7.62597e-05	6.39013e-05	0.000134774	0.000101767	0.000127192	0.000135422	1.59191e-05	4.49908e-05	4.32984e-05	5.47569e-05
Enterococcus hirae	7.14619e-05	4.88782e-05	6.76428e-05	5.62956e-05	5.40817e-05	7.11671e-05	6.74098e-05	5.63826e-05	4.88726e-05	6.30131e-05	5.46668e-05	4.59336e-05	9.28317e-05	8.75076e-05	9.82044e-05	8.23224e-05	1.43133e-05	3.15676e-05	3.01859e-05	4.38055e-05
Prosthecochloris aestuarii	7.14619e-05	6.5819e-05	6.02688e-05	5.54322e-05	4.017e-05	5.74036e-05	5.9736e-05	5.89382e-05	4.19784e-05	3.92224e-05	4.28698e-05	4.94112e-05	2.33011e-05	2.47663e-05	2.58718e-05	2.81535e-05	1.16601e-05	1.74964e-05	1.82345e-05	2.24121e-05
Starkeya novella	7.14619e-05	7.52614e-05	6.02688e-05	8.34074e-05	5.99941e-05	6.69709e-05	6.80117e-05	6.54869e-05	7.66028e-05	7.18006e-05	7.67864e-05	7.52035e-05	6.63617e-05	6.19908e-05	7.2739e-05	7.6264e-05	5.79513e-06	2.10142e-05	2.15126e-05	2.62324e-05
Achromobacter insolitus	7.12833e-05	5.16554e-05	4.42444e-05	4.66252e-05	3.86049e-05	3.82691e-05	3.76171e-05	3.35421e-05	3.03347e-05	5.27252e-05	3.62339e-05	3.47762e-05	4.93984e-05	5.88387e-05	3.84691e-05	5.75544e-05	5.0271e-06	1.40712e-05	1.15417e-05	1.36256e-05
Pediococcus acidilactici	7.12833e-05	6.60967e-05	8.50853e-05	7.7018e-05	7.32102e-05	8.57697e-05	7.26762e-05	6.34104e-05	6.83297e-05	5.12249e-05	5.89854e-05	5.81052e-05	4.28741e-05	4.15774e-05	7.36872e-05	4.70414e-05	4.18925e-05	5.07304e-05	6.15329e-05	9.30867e-05
Actinotignum schaalii	7.11046e-05	6.27641e-05	7.87039e-05	6.73476e-05	6.3646e-05	5.28718e-05	6.27453e-05	5.04728e-05	5.08643e-05	7.45869e-05	6.27773e-05	4.63683e-05	5.21946e-05	4.30784e-05	4.30745e-05	5.41688e-05	7.88975e-06	2.3236e-05	2.36297e-05	2.5723e-05
Methanosphaera sp. BMS	7.11046e-05	5.63766e-05	6.50903e-05	5.85406e-05	7.00801e-05	8.107e-05	8.24567e-05	6.26118e-05	5.11707e-05	7.58729e-05	5.76161e-05	6.78136e-05	6.99034e-05	6.93457e-05	5.60781e-05	6.46819e-05	2.48562e-05	2.87904e-05	3.83812e-05	5.81951e-05
Methylosinus trichosporium	7.11046e-05	7.30396e-05	7.23225e-05	6.80383e-05	8.45135e-05	8.62733e-05	6.24444e-05	6.21327e-05	7.58368e-05	5.05819e-05	6.3936e-05	6.66544e-05	9.41366e-05	9.35116e-05	0.000116897	0.000107803	5.0271e-06	2.74018e-05	2.56102e-05	2.64871e-05
Pseudorhodoplanes sinuspersici	7.11046e-05	6.02646e-05	7.0479e-05	6.02674e-05	6.8689e-05	5.92499e-05	6.1993e-05	6.64452e-05	7.03214e-05	6.6228e-05	6.43573e-05	7.34647e-05	4.43654e-05	6.04898e-05	3.80627e-05	6.05836e-05	4.67799e-06	3.11973e-05	2.38346e-05	2.82698e-05
Virgibacillus halodenitrificans	7.11046e-05	8.38706e-05	0.0001082	0.000110174	8.72958e-05	8.09022e-05	0.000100362	7.65078e-05	7.72157e-05	9.53769e-05	9.04794e-05	8.72303e-05	0.00012303	9.20106e-05	0.000132068	9.65773e-05	1.57097e-05	4.85086e-05	4.3913e-05	5.71764e-05
Miniimonas sp. S16	7.0926e-05	6.94293e-05	5.44546e-05	6.57934e-05	6.31243e-05	6.59638e-05	6.6808e-05	6.45285e-05	5.66861e-05	8.80897e-05	7.42584e-05	6.33217e-05	7.94103e-05	8.28545e-05	7.58545e-05	7.87586e-05	5.44602e-06	2.518e-05	1.91906e-05	2.50863e-05
Actinomyces slackii	7.039e-05	6.85962e-05	5.21857e-05	6.16489e-05	6.48632e-05	4.98505e-05	6.80117e-05	4.71186e-05	5.16303e-05	3.77221e-05	5.71948e-05	6.31768e-05	6.61752e-05	5.73377e-05	6.44763e-05	5.27433e-05	7.81993e-06	5.28595e-05	3.17567e-05	3.43822e-05
Calditerrivibrio nitroreducens	7.039e-05	8.99804e-05	9.88408e-05	6.18216e-05	0.000104685	0.000116821	0.000103221	9.53553e-05	8.50291e-05	8.14455e-05	9.18487e-05	9.41855e-05	7.88511e-05	5.62871e-05	7.61254e-05	8.44606e-05	2.31107e-05	5.18412e-05	4.56204e-05	7.233e-05
Solimonas sp. K1W22B-7	7.02113e-05	7.41505e-05	6.3105e-05	6.52753e-05	7.66882e-05	6.91529e-05	6.57547e-05	8.94455e-05	0.000104486	0.000103093	9.2902e-05	8.89691e-05	8.202e-05	8.3605e-05	7.58545e-05	8.1966e-05	2.70905e-05	2.89755e-05	3.46933e-05	5.0682e-05
Sporosarcina sp. PTS2304	7.02113e-05	0.000101645	5.87089e-05	9.32505e-05	0.00011338	0.000106247	0.000115409	0.000106696	0.000100043	0.000121954	0.000101329	0.000110994	8.74259e-05	8.8108e-05	8.73681e-05	8.2857e-05	8.09921e-06	4.0177e-05	2.88883e-05	3.25995e-05
Streptococcus oralis	7.02113e-05	6.99847e-05	7.65768e-05	7.90902e-05	6.08636e-05	7.97272e-05	9.46446e-05	5.65423e-05	5.45412e-05	4.11514e-05	5.35082e-05	5.89746e-05	5.61091e-05	5.7788e-05	5.72972e-05	5.93363e-05	1.24979e-05	3.90661e-05	3.27811e-05	4.04946e-05
Asticcacaulis excentricus	6.9854e-05	9.35907e-05	7.99802e-05	6.59661e-05	8.72958e-05	7.55311e-05	9.19362e-05	6.90008e-05	6.72573e-05	7.95165e-05	7.13092e-05	7.62178e-05	9.30182e-05	7.21975e-05	8.85872e-05	7.37694e-05	1.24281e-05	3.55483e-05	2.92298e-05	3.6547e-05
Kineococcus radiotolerans	6.96754e-05	7.13733e-05	7.89876e-05	6.76929e-05	8.29484e-05	9.41621e-05	7.17734e-05	8.68899e-05	7.599e-05	6.04411e-05	6.72013e-05	8.02751e-05	5.81596e-05	7.88019e-05	7.49063e-05	7.07402e-05	6.42351e-06	4.05473e-05	3.13469e-05	3.64197e-05
Woeseia oceani	6.94967e-05	6.3875e-05	5.40292e-05	5.81952e-05	5.72118e-05	5.06897e-05	4.95041e-05	5.49451e-05	7.50708e-05	7.33009e-05	6.00387e-05	6.56401e-05	3.65362e-05	3.54233e-05	3.68436e-05	3.29646e-05	4.04961e-06	1.14791e-05	1.17466e-05	1.23521e-05
Streptomyces olivoreticuli	6.91394e-05	5.66543e-05	6.79265e-05	6.40665e-05	5.84291e-05	6.42853e-05	6.01874e-05	6.43688e-05	5.79117e-05	5.74405e-05	5.78268e-05	6.98422e-05	6.93442e-05	5.3135e-05	6.89463e-05	7.39476e-05	7.26136e-06	2.59206e-05	2.04199e-05	2.15207e-05
Veillonella rodentium	6.89607e-05	9.60902e-05	9.5721e-05	8.28893e-05	9.82513e-05	8.17414e-05	9.07324e-05	9.29594e-05	9.22298e-05	9.66629e-05	9.94326e-05	9.33161e-05	0.000124708	0.00012173	0.000105654	0.000139164	3.46311e-05	4.73977e-05	4.32984e-05	5.13187e-05
Streptococcus respiraculi	6.87821e-05	6.16532e-05	6.53739e-05	8.13351e-05	6.1907e-05	6.09284e-05	6.18425e-05	4.72783e-05	6.17419e-05	6.64423e-05	5.88801e-05	5.23092e-05	8.27657e-05	9.75642e-05	7.70736e-05	9.63992e-05	5.44602e-06	3.33265e-05	2.43127e-05	3.06893e-05
Bordetella sp. HZ20	6.86034e-05	6.9707e-05	7.88457e-05	8.73791e-05	8.72958e-05	9.11408e-05	8.48642e-05	8.46537e-05	8.99317e-05	6.27987e-05	9.86953e-05	8.1869e-05	8.5189e-05	9.32114e-05	7.59899e-05	7.85805e-05	3.1559e-05	5.36927e-05	4.35716e-05	5.36108e-05
Lactococcus sp. 1JSPR-7	6.86034e-05	7.8594e-05	7.2748e-05	6.95925e-05	6.12114e-05	6.52924e-05	6.78612e-05	5.68618e-05	6.17419e-05	8.40174e-05	7.52064e-05	6.39013e-05	5.46179e-05	3.3472e-05	4.95763e-05	5.11397e-05	8.65778e-06	2.20325e-05	2.26053e-05	3.00526e-05
Methanobrevibacter sp. AbM4	6.86034e-05	5.60989e-05	6.46649e-05	6.71749e-05	5.6864e-05	6.49567e-05	6.27453e-05	5.04728e-05	5.10175e-05	7.90878e-05	5.26656e-05	5.27439e-05	4.77207e-05	4.17275e-05	4.26681e-05	4.08048e-05	4.08452e-05	3.95289e-05	5.05375e-05	6.26521e-05
Terriglobus saanensis	6.86034e-05	8.58146e-05	7.54423e-05	6.70022e-05	8.26006e-05	7.48597e-05	7.82436e-05	7.20355e-05	7.27727e-05	5.74405e-05	5.60362e-05	7.62178e-05	7.00898e-05	8.49559e-05	7.91054e-05	8.98062e-05	1.0124e-05	1.90702e-05	1.80979e-05	2.47043e-05
Bacillus weihaiensis	6.84248e-05	8.55369e-05	6.72174e-05	8.56523e-05	9.92947e-05	7.18384e-05	9.96101e-05	7.29939e-05	8.44163e-05	7.13719e-05	8.57395e-05	8.31731e-05	0.000112218	0.000107621	0.000141821	0.000107447	9.84473e-06	3.88809e-05	3.48299e-05	3.82025e-05
Caulobacter flavus	6.82461e-05	6.35972e-05	7.77113e-05	5.09424e-05	5.32122e-05	6.21033e-05	6.27453e-05	6.85216e-05	6.97086e-05	3.23639e-05	3.03354e-05	5.65113e-05	2.16235e-05	1.89125e-05	1.99118e-05	2.36989e-05	5.58566e-06	1.80519e-05	1.75515e-05	1.57904e-05
Planctomyces sp. SH-PL62	6.82461e-05	8.63701e-05	8.42345e-05	8.56523e-05	0.00011338	0.00010994	0.000103974	0.000130495	0.000125935	0.00010095	0.000100591	0.000112878	9.93561e-05	0.000104018	0.000107144	0.000106556	7.75011e-06	5.37853e-05	3.65373e-05	4.21501e-05
Thermobispora bispora	6.78888e-05	4.74896e-05	5.60145e-05	4.48984e-05	5.54728e-05	4.69971e-05	5.22125e-05	3.8174e-05	4.397e-05	5.18679e-05	4.69777e-05	3.43415e-05	8.03423e-05	9.09599e-05	7.01654e-05	9.39045e-05	4.39871e-06	1.93479e-05	2.26053e-05	1.91012e-05
Truepera radiovictrix	6.78888e-05	8.94249e-05	8.62198e-05	8.61703e-05	0.000112337	9.83582e-05	9.67512e-05	8.01815e-05	9.49875e-05	8.74467e-05	8.65822e-05	8.60711e-05	7.73598e-05	8.2104e-05	7.89699e-05	8.69553e-05	2.43675e-05	4.13804e-05	4.87619e-05	7.46222e-05
Ahniella affigens	6.77102e-05	8.27597e-05	6.0127e-05	6.40665e-05	5.19949e-05	5.84107e-05	7.22248e-05	6.85216e-05	5.16303e-05	6.04411e-05	6.78332e-05	5.99889e-05	8.29521e-05	6.64938e-05	8.75035e-05	6.98493e-05	7.33118e-06	3.99918e-05	2.99128e-05	3.32362e-05
Azospirillum sp. CFH 70021	6.77102e-05	8.47038e-05	9.18922e-05	9.30778e-05	8.22528e-05	8.86231e-05	6.48519e-05	8.01815e-05	7.76753e-05	7.99451e-05	8.82675e-05	7.92608e-05	7.99695e-05	9.59131e-05	9.88817e-05	8.4817e-05	8.09921e-06	5.85065e-05	3.83129e-05	3.98579e-05
Ectothiorhodospira sp. BSL-9	6.77102e-05	5.16554e-05	7.03372e-05	8.78972e-05	7.04279e-05	5.87464e-05	4.87518e-05	5.0952e-05	5.2856e-05	5.18679e-05	6.85706e-05	6.14379e-05	5.44315e-05	5.32851e-05	5.36399e-05	6.43255e-05	2.18539e-05	4.79531e-05	4.00886e-05	5.25921e-05
Endomicrobium proavitum	6.77102e-05	8.55369e-05	8.80633e-05	9.03148e-05	0.00011425	0.000115982	0.00010909	8.38551e-05	6.87893e-05	7.0086e-05	7.56277e-05	7.05667e-05	7.15811e-05	8.13536e-05	9.0619e-05	6.71765e-05	2.19237e-05	4.22136e-05	3.60592e-05	5.1446e-05
Lactobacillus jensenii	6.77102e-05	7.33173e-05	8.50853e-05	6.42392e-05	0.000105555	9.80225e-05	9.72026e-05	8.99246e-05	8.5642e-05	9.98779e-05	7.91037e-05	7.76668e-05	5.44315e-05	5.04332e-05	6.71854e-05	4.6685e-05	3.23969e-05	3.32339e-05	4.24106e-05	7.48769e-05
Campylobacter sputorum	6.75315e-05	7.38728e-05	7.2748e-05	7.39096e-05	6.29504e-05	7.15027e-05	6.51528e-05	7.34731e-05	5.42348e-05	5.07962e-05	4.41337e-05	4.83969e-05	7.40044e-05	8.75076e-05	7.76154e-05	7.78677e-05	9.21635e-06	2.22177e-05	1.7893e-05	2.15207e-05
Candidatus Nitrospira inopinata	6.75315e-05	6.47081e-05	7.33152e-05	8.11624e-05	6.74717e-05	6.2439e-05	7.28267e-05	5.36673e-05	5.45412e-05	5.27252e-05	5.11909e-05	5.68011e-05	5.7414e-05	7.24977e-05	5.67554e-05	6.41473e-05	9.49563e-06	2.93458e-05	3.60592e-05	2.94159e-05
Methanosarcina barkeri	6.75315e-05	8.55369e-05	8.06893e-05	0.000103266	0.000114945	8.27485e-05	9.87073e-05	7.37925e-05	8.44163e-05	0.000141887	9.4166e-05	6.94075e-05	8.81715e-05	9.21607e-05	0.000101862	0.000100497	1.29867e-05	5.25818e-05	3.763e-05	3.87118e-05
Roseiflexus castenholzii	6.75315e-05	6.85962e-05	7.44497e-05	7.27008e-05	8.74697e-05	6.86494e-05	7.88454e-05	9.59942e-05	9.46811e-05	7.43726e-05	9.76419e-05	9.07079e-05	6.91578e-05	4.66807e-05	5.59427e-05	5.18524e-05	7.61047e-06	3.02716e-05	2.73859e-05	3.04346e-05
Arcobacter pacificus	6.73529e-05	5.19331e-05	2.36821e-05	3.69548e-05	5.98203e-05	3.86048e-05	3.26516e-05	4.85561e-05	4.90258e-05	5.05819e-05	4.57137e-05	4.34702e-05	1.9573e-05	1.8162e-05	1.95054e-05	1.38986e-05	1.96196e-05	2.194e-05	2.38346e-05	1.84645e-05
Chryseobacterium sp. IHB B 17019	6.73529e-05	6.16532e-05	4.48116e-05	4.33442e-05	2.57366e-05	3.44086e-05	2.48273e-05	3.94518e-05	2.55853e-05	3.17209e-05	2.21195e-05	2.30392e-05	1.41671e-05	2.16142e-05	1.15136e-05	1.51459e-05	2.26918e-05	2.49023e-05	2.45175e-05	2.30488e-05
Nakamurella multipartita	6.73529e-05	8.2482e-05	7.92712e-05	9.65315e-05	8.19051e-05	7.87202e-05	6.37986e-05	5.47853e-05	6.84829e-05	7.0086e-05	6.97292e-05	6.17278e-05	8.35113e-05	8.46557e-05	9.07545e-05	8.71334e-05	2.85567e-05	4.5824e-05	4.94448e-05	5.87045e-05
Capnocytophaga sputigena	6.71742e-05	5.58212e-05	5.33201e-05	3.74729e-05	4.15612e-05	5.77393e-05	6.51528e-05	7.61884e-05	4.94854e-05	3.98654e-05	2.62274e-05	5.15847e-05	2.16235e-05	1.86123e-05	1.80154e-05	1.58586e-05	1.3266e-05	2.89755e-05	2.10345e-05	2.15207e-05
Nocardioides sp. JS614	6.71742e-05	6.30418e-05	6.62248e-05	6.35485e-05	7.96444e-05	7.04957e-05	5.65761e-05	5.60631e-05	6.09759e-05	7.63015e-05	6.22507e-05	6.23074e-05	6.50568e-05	5.20843e-05	5.9329e-05	6.66419e-05	1.0124e-05	4.2769e-05	3.79032e-05	3.62924e-05
Streptococcus ferus	6.71742e-05	6.5819e-05	5.51637e-05	4.74887e-05	7.49492e-05	6.56281e-05	6.03378e-05	5.207e-05	4.88726e-05	6.02268e-05	4.76097e-05	4.69479e-05	9.18997e-05	0.000114675	7.95117e-05	9.47955e-05	8.3785e-06	2.99013e-05	2.32882e-05	2.81425e-05
Streptococcus marmotae	6.69955e-05	7.60945e-05	6.62248e-05	7.56365e-05	7.09496e-05	7.33491e-05	8.65193e-05	6.43688e-05	6.64913e-05	7.05146e-05	7.93143e-05	6.30319e-05	6.37519e-05	0.000101016	4.36163e-05	6.77111e-05	1.70363e-05	4.9064e-05	4.25471e-05	4.57156e-05
Streptomyces sp. GSSD-12	6.69955e-05	6.63744e-05	8.31e-05	6.16489e-05	7.44275e-05	7.50275e-05	8.56165e-05	7.60286e-05	7.70624e-05	7.75875e-05	6.15134e-05	7.63627e-05	7.34452e-05	9.44122e-05	5.75681e-05	8.62425e-05	1.6757e-05	3.16602e-05	3.84495e-05	4.74984e-05
Desulfobacca acetoxidans	6.68169e-05	7.44282e-05	6.46649e-05	7.35643e-05	0.000104859	8.59376e-05	9.11838e-05	7.18758e-05	7.0015e-05	9.30193e-05	7.60491e-05	9.3461e-05	0.000110541	0.000108672	0.000115543	0.000103883	1.25677e-05	4.57314e-05	3.32592e-05	4.15134e-05
Rheinheimera sp. LHK132	6.68169e-05	5.3044e-05	5.28947e-05	6.07855e-05	5.356e-05	5.84107e-05	6.425e-05	7.29939e-05	6.25079e-05	5.37969e-05	5.23496e-05	5.79603e-05	3.07575e-05	2.85188e-05	3.84691e-05	3.42119e-05	6.14423e-06	2.78647e-05	1.82345e-05	2.012e-05
Thermotoga profunda	6.68169e-05	6.74853e-05	6.43812e-05	6.07855e-05	5.89508e-05	5.55573e-05	6.80117e-05	5.49451e-05	5.13239e-05	9.32336e-05	5.83534e-05	5.30337e-05	8.05287e-05	7.70007e-05	8.4659e-05	7.87586e-05	1.16601e-05	2.73092e-05	2.31517e-05	3.37455e-05
Cellulosimicrobium cellulans	6.66382e-05	7.02625e-05	5.70072e-05	3.98905e-05	5.21688e-05	5.25361e-05	3.55105e-05	4.26463e-05	6.00566e-05	4.24374e-05	4.9295e-05	4.47744e-05	5.27538e-05	6.30415e-05	4.84927e-05	5.27433e-05	3.28158e-06	1.79593e-05	1.69369e-05	1.82098e-05
Marinithermus hydrothermalis	6.66382e-05	6.74853e-05	5.95597e-05	5.87133e-05	4.95604e-05	4.8172e-05	5.25135e-05	4.69589e-05	4.94854e-05	5.93695e-05	5.52988e-05	4.78173e-05	5.36858e-05	7.26478e-05	4.63254e-05	6.0049e-05	6.35369e-06	2.73092e-05	2.31517e-05	2.71238e-05
Halothece sp. PCC 7418	6.64596e-05	6.47081e-05	5.88507e-05	5.68137e-05	5.58206e-05	6.51246e-05	5.25135e-05	6.74035e-05	5.05579e-05	5.78691e-05	5.52988e-05	4.66581e-05	4.64159e-05	5.23845e-05	4.99827e-05	5.1496e-05	5.51584e-06	1.98108e-05	1.44783e-05	1.91012e-05
Bradyrhizobium diazoefficiens	6.62809e-05	6.05424e-05	6.99118e-05	4.92155e-05	6.67761e-05	5.11933e-05	6.30463e-05	6.46882e-05	5.08643e-05	6.32274e-05	5.52988e-05	6.21625e-05	9.04084e-05	7.39987e-05	8.57426e-05	0.000100854	0.000102357	8.60009e-05	9.00114e-05	9.42328e-05
Bacillus sp. X1(2014)	6.61023e-05	7.63722e-05	7.87039e-05	9.91218e-05	0.000110772	0.000114975	8.78735e-05	8.56121e-05	0.000100963	0.000125169	9.55353e-05	8.52017e-05	0.000100102	9.48624e-05	9.14317e-05	9.31918e-05	1.20092e-05	2.518e-05	3.40787e-05	4.04946e-05
Candidatus Phycorickettsia trachydisci	6.61023e-05	4.99891e-05	4.96331e-05	4.92155e-05	5.42556e-05	4.3808e-05	3.92723e-05	3.03476e-05	4.59617e-05	5.33682e-05	4.12898e-05	5.9844e-05	4.43654e-05	5.64372e-05	3.80627e-05	0.00014059	4.32889e-06	2.50875e-05	3.37372e-05	2.34309e-05
Halobacillus halophilus	6.61023e-05	6.35972e-05	7.38824e-05	0.000103784	9.52951e-05	0.000102219	8.65193e-05	7.95426e-05	8.0433e-05	7.67302e-05	9.4798e-05	8.52017e-05	8.87307e-05	8.99092e-05	8.92645e-05	0.000101032	1.38245e-05	6.80416e-05	4.12496e-05	5.45022e-05
Bifidobacterium actinocoloniiforme	6.55663e-05	8.72032e-05	7.70022e-05	8.9106e-05	8.78175e-05	8.14057e-05	6.6507e-05	8.41746e-05	8.93189e-05	8.05881e-05	8.66875e-05	8.66507e-05	9.52551e-05	0.000118878	9.88817e-05	0.000117425	7.40101e-06	4.75829e-05	4.48691e-05	4.55883e-05
Campylobacter concisus	6.55663e-05	8.2482e-05	7.7144e-05	9.94672e-05	7.98183e-05	8.14057e-05	8.63689e-05	7.63481e-05	7.95137e-05	9.0233e-05	7.03612e-05	7.83913e-05	7.26996e-05	7.70007e-05	7.51772e-05	7.16312e-05	3.10004e-05	5.12858e-05	4.96497e-05	4.82625e-05
Carnobacterium sp. 17-4	6.55663e-05	6.80407e-05	9.24594e-05	8.5825e-05	9.07738e-05	7.03278e-05	7.23753e-05	7.95426e-05	9.71324e-05	9.94492e-05	8.51075e-05	8.08547e-05	0.000103084	0.000113325	9.41408e-05	0.000100854	1.23583e-05	4.02695e-05	3.09372e-05	4.04946e-05
Fervidobacterium pennivorans	6.55663e-05	4.86005e-05	7.51587e-05	7.40823e-05	4.93865e-05	5.67322e-05	5.91341e-05	4.71186e-05	4.45828e-05	8.38031e-05	4.41337e-05	3.85436e-05	6.1515e-05	6.06399e-05	6.21736e-05	6.14745e-05	1.09619e-05	2.46246e-05	2.82737e-05	4.6225e-05
Aquimarina sp. BL5	6.53877e-05	6.33195e-05	7.88457e-05	6.18216e-05	5.14732e-05	5.5893e-05	6.92155e-05	6.06951e-05	4.85662e-05	4.56523e-05	3.46539e-05	5.04255e-05	6.4684e-05	5.35853e-05	8.20854e-05	5.09615e-05	1.31263e-05	1.24974e-05	1.02441e-05	1.83372e-05
Burkholderia sp. OLGA172	6.53877e-05	8.80364e-05	7.31734e-05	0.000133486	6.95584e-05	7.35169e-05	0.000105027	6.86813e-05	8.59484e-05	9.0876e-05	9.59566e-05	6.88279e-05	6.50568e-05	6.48427e-05	6.19027e-05	6.12963e-05	6.7028e-06	6.63753e-05	2.75225e-05	3.5783e-05
Campylobacter fetus	6.53877e-05	4.63788e-05	6.29631e-05	6.16489e-05	5.54728e-05	5.67322e-05	5.25135e-05	6.29313e-05	5.14771e-05	6.21557e-05	4.98216e-05	5.27439e-05	4.34333e-05	4.00764e-05	3.874e-05	4.3834e-05	5.51584e-06	2.04588e-05	1.98053e-05	2.03747e-05
Glycocaulis alkaliphilus	6.53877e-05	5.74875e-05	5.19021e-05	3.98905e-05	3.58226e-05	5.55573e-05	4.79994e-05	4.24866e-05	4.96386e-05	2.65769e-05	2.9914e-05	3.86885e-05	3.31808e-05	4.12772e-05	3.35927e-05	5.27433e-05	6.21405e-06	1.24974e-05	1.20197e-05	1.45169e-05
Thiocystis violascens	6.53877e-05	6.41527e-05	5.14766e-05	6.19943e-05	6.59066e-05	5.20325e-05	5.64256e-05	5.63826e-05	5.02515e-05	6.08698e-05	5.54042e-05	4.54989e-05	8.01559e-05	8.58565e-05	7.39581e-05	8.58861e-05	9.14653e-06	3.05493e-05	2.79322e-05	3.14534e-05
Gemmatimonas phototrophica	6.5209e-05	5.97092e-05	6.12614e-05	5.56049e-05	7.8601e-05	7.82166e-05	6.06388e-05	5.78201e-05	6.05162e-05	7.41582e-05	5.50882e-05	6.34666e-05	6.84122e-05	7.17472e-05	7.35517e-05	6.64637e-05	1.35452e-05	2.18474e-05	1.69369e-05	2.86519e-05
Cyanothece sp. ATCC 51142	6.50303e-05	5.24886e-05	4.79314e-05	4.35169e-05	5.356e-05	4.83399e-05	6.50023e-05	4.82367e-05	4.90258e-05	6.00124e-05	5.15069e-05	4.54989e-05	6.02102e-05	5.82383e-05	3.79272e-05	6.29e-05	7.61047e-06	1.24974e-05	1.16783e-05	1.05694e-05
Dictyoglomus thermophilum	6.50303e-05	6.52635e-05	5.70072e-05	6.493e-05	7.18191e-05	7.80488e-05	7.29772e-05	7.02786e-05	5.9597e-05	8.38031e-05	6.79386e-05	5.57868e-05	7.12083e-05	6.39421e-05	9.03481e-05	4.36558e-05	1.12412e-05	4.11027e-05	2.77956e-05	2.91612e-05
gamma proteobacterium HdN1	6.50303e-05	6.05424e-05	5.89925e-05	5.49142e-05	0.000102773	7.35169e-05	7.1623e-05	0.00013321	0.000121186	0.000126455	0.000117655	0.000116645	6.84122e-05	8.0453e-05	6.20381e-05	7.28785e-05	2.35296e-05	2.75869e-05	3.26445e-05	4.11313e-05
Ramlibacter tataouinensis	6.50303e-05	7.1651e-05	5.44546e-05	7.39096e-05	9.49473e-05	8.05665e-05	6.69584e-05	5.78201e-05	6.78701e-05	7.80162e-05	6.43573e-05	5.66562e-05	9.37638e-05	0.00010642	7.35517e-05	8.65989e-05	2.03179e-05	3.04567e-05	3.03908e-05	3.79478e-05
Burkholderia pseudomallei	6.48517e-05	7.08179e-05	7.31734e-05	7.59819e-05	7.25147e-05	6.17676e-05	5.05574e-05	6.83619e-05	8.794e-05	7.73732e-05	7.25731e-05	8.25935e-05	4.95848e-05	4.96827e-05	5.90581e-05	4.22303e-05	2.2971e-05	5.38779e-05	3.94739e-05	5.27194e-05
Gloeobacter violaceus	6.48517e-05	7.94271e-05	7.44497e-05	7.27008e-05	9.33822e-05	9.55048e-05	8.66698e-05	8.76885e-05	9.17702e-05	7.88735e-05	8.88995e-05	9.59243e-05	5.34994e-05	4.87821e-05	5.52654e-05	5.82671e-05	9.0767e-06	3.80478e-05	2.73176e-05	3.70564e-05
Oleiphilus messinensis	6.48517e-05	8.02603e-05	7.33152e-05	7.06286e-05	8.34701e-05	7.33491e-05	8.83249e-05	7.55495e-05	8.16586e-05	7.67302e-05	7.60491e-05	8.17241e-05	0.000133283	0.000122781	0.000120825	0.000131324	9.84473e-06	3.98992e-05	3.95422e-05	3.93486e-05
Streptococcus pantholopis	6.4673e-05	7.38728e-05	7.13299e-05	6.02674e-05	5.46034e-05	8.30842e-05	8.20053e-05	4.26463e-05	5.25495e-05	5.44399e-05	4.57137e-05	3.81089e-05	0.000109981	0.00010567	9.9559e-05	0.000106199	1.09619e-05	3.27711e-05	2.69078e-05	4.26594e-05
Streptomyces sp. CLI2509	6.4673e-05	8.41483e-05	7.09044e-05	9.86037e-05	7.44275e-05	7.73774e-05	6.72594e-05	6.16535e-05	5.62265e-05	6.92286e-05	7.32051e-05	6.47707e-05	4.58566e-05	4.83318e-05	5.29627e-05	3.9023e-05	6.63298e-06	3.49003e-05	3.47616e-05	3.22174e-05
Ketobacter alkanivorans	6.44944e-05	5.83206e-05	4.46698e-05	3.73002e-05	3.70399e-05	4.76685e-05	5.26639e-05	5.65423e-05	3.21732e-05	4.5438e-05	4.00258e-05	4.11518e-05	2.72157e-05	2.83687e-05	3.77918e-05	3.13609e-05	5.93477e-06	2.00885e-05	1.441e-05	1.68091e-05
Rhodoferax koreense	6.44944e-05	7.47059e-05	4.93495e-05	6.2685e-05	6.29504e-05	5.30396e-05	5.56733e-05	5.76604e-05	6.32739e-05	6.45134e-05	5.98281e-05	6.25972e-05	6.99034e-05	7.18973e-05	5.66199e-05	7.25221e-05	1.34056e-05	2.92533e-05	2.21955e-05	2.76331e-05
Streptomyces globosus	6.44944e-05	7.30396e-05	5.02003e-05	6.42392e-05	4.62564e-05	6.17676e-05	5.79303e-05	8.32162e-05	6.63381e-05	6.7514e-05	5.87748e-05	6.24523e-05	5.14489e-05	6.69441e-05	5.37754e-05	5.4347e-05	4.46853e-06	2.8883e-05	2.32882e-05	2.41949e-05
Fusobacterium gonidiaformans	6.43157e-05	8.72032e-05	8.15401e-05	7.94356e-05	8.57308e-05	7.98951e-05	0.000111347	6.03757e-05	6.49592e-05	8.23028e-05	8.68982e-05	7.36096e-05	0.000107372	0.000108822	0.000115407	0.000104239	1.20092e-05	5.63773e-05	4.28886e-05	4.77531e-05
Moorea producens	6.43157e-05	4.91559e-05	7.40242e-05	5.87133e-05	6.74717e-05	7.09992e-05	7.31276e-05	6.75633e-05	6.14355e-05	6.06554e-05	5.89854e-05	5.20194e-05	7.51229e-05	8.0453e-05	6.88108e-05	8.21442e-05	6.98208e-06	2.97161e-05	2.51322e-05	2.73784e-05
Nitrospira moscoviensis	6.43157e-05	5.33217e-05	5.57309e-05	4.14446e-05	4.6778e-05	4.39759e-05	5.08583e-05	4.71186e-05	4.53489e-05	4.65096e-05	4.82416e-05	4.85418e-05	6.78529e-05	6.55932e-05	5.64845e-05	7.03839e-05	8.65778e-06	3.49003e-05	2.58151e-05	2.81425e-05
Desulfotalea psychrophila	6.41371e-05	0.000103866	7.54423e-05	6.63114e-05	0.000110772	8.62733e-05	0.000105629	0.000107654	0.000106172	0.000119811	0.000102803	0.000106937	5.76004e-05	6.49928e-05	5.29627e-05	6.29e-05	1.71759e-05	3.27711e-05	2.59517e-05	3.6547e-05
Microcoleus sp. PCC 7113	6.41371e-05	7.44282e-05	7.45915e-05	6.95925e-05	9.84252e-05	8.47626e-05	8.39614e-05	9.51955e-05	0.000103567	8.72324e-05	9.5746e-05	9.07079e-05	7.66142e-05	9.74141e-05	8.58781e-05	9.55082e-05	6.63298e-06	4.00844e-05	3.03225e-05	4.27868e-05
Agarilytica rhodophyticola	6.39584e-05	8.30374e-05	7.37406e-05	7.83995e-05	8.31223e-05	9.36585e-05	8.74221e-05	7.65078e-05	5.83714e-05	4.2866e-05	5.42455e-05	6.37564e-05	7.45637e-05	9.20106e-05	0.000104706	9.9072e-05	1.09619e-05	4.85086e-05	2.95713e-05	3.48916e-05
Vibrio parahaemolyticus	6.39584e-05	5.08223e-05	6.977e-05	5.37054e-05	3.91266e-05	4.53186e-05	5.05574e-05	5.06325e-05	4.50425e-05	3.98654e-05	4.98216e-05	3.99926e-05	8.55618e-05	0.000109872	5.06599e-05	8.7668e-05	4.67799e-06	1.64781e-05	2.12394e-05	1.71911e-05
Dyella japonica	6.37798e-05	6.19309e-05	6.60829e-05	7.99536e-05	5.66901e-05	5.22004e-05	4.84508e-05	5.47853e-05	7.12406e-05	6.85857e-05	5.02429e-05	5.20194e-05	2.62837e-05	3.31718e-05	3.41345e-05	2.53026e-05	6.7028e-06	1.45341e-05	1.69369e-05	1.6045e-05
Granulicella mallensis	6.37798e-05	7.24842e-05	7.9413e-05	6.56207e-05	9.23388e-05	9.58405e-05	8.21557e-05	7.95426e-05	8.47227e-05	8.50891e-05	7.84717e-05	7.50586e-05	7.82918e-05	5.29849e-05	0.000100507	5.22088e-05	1.96895e-05	3.32339e-05	3.54446e-05	6.03599e-05
Actinobaculum sp. 313	6.34225e-05	7.19288e-05	7.18971e-05	8.11624e-05	8.6948e-05	8.74482e-05	7.25258e-05	7.02786e-05	7.82881e-05	7.67302e-05	6.97292e-05	8.34629e-05	6.82257e-05	7.18973e-05	6.98945e-05	7.57295e-05	1.34056e-05	5.73031e-05	4.94448e-05	6.90192e-05
Beutenbergia cavernae	6.34225e-05	6.66521e-05	7.38824e-05	9.44593e-05	9.1991e-05	7.93915e-05	7.73408e-05	9.72719e-05	0.000108316	0.000102235	0.000101539	0.000108241	5.77868e-05	6.55932e-05	5.62136e-05	6.11181e-05	4.46853e-06	3.69369e-05	3.04591e-05	3.79478e-05
Magnetococcus marinus	6.34225e-05	9.16467e-05	9.47283e-05	9.98125e-05	0.000115293	0.00010289	9.14848e-05	8.57718e-05	8.74804e-05	9.73059e-05	0.000104699	9.86775e-05	0.000107558	0.000123531	8.72326e-05	0.000114931	2.31805e-05	5.67476e-05	4.45277e-05	6.16333e-05
Rhizobacter gummiphilus	6.34225e-05	7.38728e-05	5.7149e-05	9.11782e-05	6.5211e-05	5.99213e-05	5.52219e-05	6.26118e-05	7.92073e-05	8.08025e-05	7.04665e-05	7.21606e-05	5.44315e-05	5.40356e-05	4.91699e-05	5.1496e-05	1.29168e-05	4.85086e-05	3.05957e-05	4.30415e-05
Nonlabens sp. MB-3u-79	6.32438e-05	5.35994e-05	4.7506e-05	3.73002e-05	2.48671e-05	3.87726e-05	4.21312e-05	4.98339e-05	3.21732e-05	2.31477e-05	2.12769e-05	3.62252e-05	2.10642e-05	2.56669e-05	1.85573e-05	3.06482e-05	4.88746e-06	1.16643e-05	9.97092e-06	1.28615e-05
Roseiflexus sp. RS-1	6.32438e-05	6.05424e-05	6.09778e-05	7.46004e-05	5.72118e-05	6.64673e-05	5.31153e-05	4.90353e-05	5.85246e-05	5.44399e-05	5.01376e-05	5.79603e-05	5.03305e-05	6.60435e-05	5.24209e-05	5.86235e-05	4.67799e-06	3.04567e-05	2.84786e-05	3.17081e-05
Bacillus licheniformis	6.30651e-05	8.33152e-05	7.13299e-05	5.45688e-05	3.72138e-05	5.35431e-05	5.32658e-05	4.77575e-05	4.78002e-05	3.94367e-05	4.30804e-05	4.41948e-05	4.9212e-05	3.28716e-05	3.64372e-05	3.93793e-05	5.09692e-06	1.0646e-05	1.43417e-05	1.98653e-05
Streptomyces formicae	6.30651e-05	6.33195e-05	4.42444e-05	4.14446e-05	7.89488e-05	6.10962e-05	4.95041e-05	3.57782e-05	6.15887e-05	3.62218e-05	5.69841e-05	4.8252e-05	5.01441e-05	4.69809e-05	4.619e-05	5.61289e-05	3.77032e-06	2.42543e-05	1.7893e-05	2.1266e-05
Prosthecochloris sp. CIB 2401	6.28865e-05	7.91494e-05	6.3814e-05	7.9781e-05	4.71258e-05	6.93207e-05	5.9435e-05	4.83964e-05	3.60033e-05	5.85121e-05	4.81363e-05	4.27457e-05	4.60431e-05	2.76182e-05	3.75209e-05	3.86666e-05	9.63527e-06	2.15697e-05	1.27027e-05	1.75731e-05
Streptomyces pluripotens	6.28865e-05	6.69299e-05	5.61563e-05	5.02516e-05	5.84291e-05	6.22712e-05	5.85322e-05	5.89382e-05	7.13938e-05	5.16536e-05	5.86694e-05	6.20176e-05	3.46721e-05	3.7975e-05	4.40227e-05	4.65068e-05	3.7005e-06	2.11068e-05	1.24295e-05	1.19701e-05
Actinobacillus succinogenes	6.27078e-05	6.88739e-05	4.25427e-05	5.69864e-05	5.40817e-05	5.60608e-05	6.13911e-05	5.30284e-05	5.40816e-05	7.30866e-05	5.37189e-05	6.01338e-05	6.02102e-05	7.35484e-05	5.9329e-05	6.45037e-05	1.00542e-05	2.13845e-05	2.64298e-05	2.97979e-05
Lactobacillus backii	6.27078e-05	6.99847e-05	6.16869e-05	6.11309e-05	7.91227e-05	7.46918e-05	6.59052e-05	5.57437e-05	6.18951e-05	6.88e-05	5.50882e-05	5.33235e-05	7.58685e-05	7.86518e-05	9.67144e-05	8.46388e-05	6.56316e-06	2.53652e-05	2.602e-05	2.86519e-05
Hyphomicrobium denitrificans	6.25292e-05	4.77674e-05	5.10512e-05	5.21512e-05	4.6778e-05	4.29688e-05	4.67957e-05	3.40212e-05	3.89142e-05	4.13657e-05	3.43379e-05	4.36151e-05	3.84003e-05	4.7131e-05	4.57836e-05	4.47249e-05	1.37547e-05	3.28636e-05	2.31517e-05	2.26668e-05
Lactobacillus bombi	6.25292e-05	6.16532e-05	5.33201e-05	6.2685e-05	4.55608e-05	5.40467e-05	5.67266e-05	3.78546e-05	3.7995e-05	4.97246e-05	4.59244e-05	4.34702e-05	6.99034e-05	7.76011e-05	6.36636e-05	6.59292e-05	2.22728e-05	2.84201e-05	3.86544e-05	5.29741e-05
Nitrospira japonica	6.25292e-05	5.99869e-05	6.3105e-05	5.26692e-05	6.99062e-05	7.26777e-05	7.28267e-05	6.62855e-05	5.8831e-05	7.18006e-05	4.9611e-05	6.2887e-05	5.34994e-05	6.61936e-05	5.74327e-05	4.93578e-05	1.51511e-05	2.64761e-05	3.57177e-05	4.20227e-05
Capnocytophaga leadbetteri	6.23505e-05	5.16554e-05	2.28312e-05	2.0895e-05	2.78234e-05	4.58222e-05	4.39368e-05	4.61602e-05	2.55853e-05	1.9504e-05	2.03289e-05	2.70965e-05	2.40468e-05	1.72614e-05	2.47882e-05	2.17388e-05	5.30638e-06	1.35158e-05	1.31807e-05	1.71911e-05
Massilia sp. WG5	6.23505e-05	5.3044e-05	0.000101393	6.13035e-05	4.74736e-05	4.1626e-05	3.94227e-05	4.56811e-05	4.15187e-05	4.801e-05	4.5819e-05	3.6515e-05	6.61752e-05	7.42989e-05	7.01654e-05	8.25006e-05	1.05429e-05	2.96236e-05	2.89566e-05	2.16481e-05
Pigmentiphaga sp. H8	6.23505e-05	6.9707e-05	7.45915e-05	6.37211e-05	6.13853e-05	8.72803e-05	5.22125e-05	6.7723e-05	7.04746e-05	5.31539e-05	6.76226e-05	6.34666e-05	6.03966e-05	7.33983e-05	6.5289e-05	6.93147e-05	2.93247e-05	2.20325e-05	2.37663e-05	3.08167e-05
Streptomyces alboflavus	6.23505e-05	7.55391e-05	5.99852e-05	8.34074e-05	7.14713e-05	7.28455e-05	8.42623e-05	5.79798e-05	6.37336e-05	4.84386e-05	6.49893e-05	7.1581e-05	8.59346e-05	9.32114e-05	8.58781e-05	8.74898e-05	2.65319e-06	3.5826e-05	2.86152e-05	2.95433e-05
Acholeplasma laidlawii	6.21719e-05	6.41527e-05	0.00017088	8.72065e-05	0.000110772	0.000206452	0.00017033	0.0001158	6.15887e-05	5.91551e-05	5.87748e-05	5.95542e-05	8.76123e-05	0.00010672	9.10254e-05	9.40827e-05	0.000152908	0.00012266	0.000221204	0.000341148
Amycolatopsis albispora	6.21719e-05	5.94315e-05	6.52321e-05	6.35485e-05	6.15592e-05	4.3808e-05	4.5291e-05	5.25492e-05	5.74521e-05	6.12984e-05	5.68788e-05	5.36133e-05	4.77207e-05	4.12772e-05	4.75445e-05	4.47249e-05	5.23656e-06	3.49928e-05	2.47224e-05	3.18354e-05
Chlorobaculum tepidum	6.21719e-05	6.33195e-05	5.61563e-05	5.40507e-05	4.86909e-05	7.75452e-05	8.24567e-05	8.35357e-05	8.07394e-05	4.92959e-05	4.98216e-05	8.40425e-05	4.67887e-05	5.10336e-05	6.20381e-05	4.81105e-05	5.65549e-06	1.87924e-05	1.07904e-05	1.01873e-05
Kurthia sp. 11kri321	6.21719e-05	6.80407e-05	6.63666e-05	8.9106e-05	8.74697e-05	7.60346e-05	0.000100814	8.46537e-05	8.91657e-05	0.000124954	8.94261e-05	9.18671e-05	0.000117811	0.000128935	8.39817e-05	0.000102814	1.04731e-05	3.7122e-05	2.91615e-05	3.85845e-05
Micropruina glycogenica	6.21719e-05	6.88739e-05	6.99118e-05	6.51026e-05	9.75557e-05	6.98243e-05	5.95855e-05	4.82367e-05	7.55304e-05	5.16536e-05	5.86694e-05	6.01338e-05	6.02102e-05	5.44859e-05	5.54009e-05	5.29215e-05	1.70363e-05	5.12858e-05	5.19717e-05	6.09966e-05
Streptococcus uberis	6.21719e-05	7.38728e-05	8.0122e-05	8.99694e-05	7.87749e-05	8.40913e-05	7.91464e-05	9.69525e-05	9.59067e-05	0.000117882	8.85835e-05	8.60711e-05	6.72937e-05	5.83884e-05	6.06836e-05	7.10966e-05	2.77887e-05	4.30467e-05	3.60592e-05	4.0622e-05
Streptomyces sp. ZFG47	6.21719e-05	4.44348e-05	3.38923e-05	5.30146e-05	4.93865e-05	3.89405e-05	4.70966e-05	2.92295e-05	4.09059e-05	3.47215e-05	4.49764e-05	5.2599e-05	5.61091e-05	4.563e-05	5.64845e-05	4.63286e-05	3.28158e-06	3.98992e-05	2.2059e-05	2.58503e-05
Actinomyces sp. VUL4_3	6.19932e-05	6.9707e-05	8.36672e-05	7.51184e-05	5.87769e-05	7.73774e-05	7.6137e-05	7.20355e-05	5.31624e-05	7.0086e-05	5.44562e-05	5.9844e-05	7.13947e-05	7.39987e-05	6.69145e-05	6.39691e-05	2.72999e-05	3.73072e-05	4.15227e-05	6.48169e-05
Arthrobacter sp. PAMC 25486	6.18146e-05	6.72076e-05	5.28947e-05	5.45688e-05	0.000103294	0.000117996	3.76171e-05	4.15283e-05	7.81349e-05	3.75078e-05	4.6767e-05	5.33235e-05	2.40468e-05	5.49362e-05	4.55127e-05	5.34561e-05	2.09462e-06	2.13845e-05	1.37954e-05	1.66818e-05
Ferrimonas balearica	6.18146e-05	5.24886e-05	5.26111e-05	3.5746e-05	3.86049e-05	4.41437e-05	5.43191e-05	4.02505e-05	3.58501e-05	3.00062e-05	3.54966e-05	3.76742e-05	4.43654e-05	4.21778e-05	4.97118e-05	4.59722e-05	1.56399e-05	1.24974e-05	2.26053e-05	2.27941e-05
Tessaracoccus sp. T2.5-30	6.18146e-05	6.10978e-05	8.32418e-05	5.26692e-05	6.39938e-05	5.95856e-05	6.50023e-05	6.16535e-05	5.79117e-05	7.90878e-05	7.38371e-05	5.82501e-05	9.45094e-05	7.41488e-05	8.50654e-05	8.25006e-05	1.35452e-05	2.74018e-05	3.4147e-05	4.07493e-05
Chondrocystis sp. NIES-4102	6.16359e-05	6.9707e-05	6.29631e-05	7.23555e-05	6.06897e-05	6.36139e-05	6.40995e-05	7.28342e-05	7.29259e-05	6.45134e-05	7.07825e-05	8.14343e-05	5.55499e-05	5.70375e-05	5.01181e-05	5.06051e-05	5.58566e-06	3.18453e-05	2.32199e-05	2.44496e-05
Devosia sp. A16	6.16359e-05	5.80429e-05	6.0836e-05	7.27008e-05	6.85151e-05	6.10962e-05	6.09397e-05	6.03757e-05	6.64913e-05	8.42318e-05	6.80439e-05	5.59317e-05	6.93442e-05	6.85952e-05	6.28508e-05	5.59507e-05	6.49334e-06	2.37914e-05	2.06931e-05	2.89065e-05
Psychromonas ingrahamii	6.16359e-05	6.47081e-05	4.90659e-05	4.95609e-05	6.39938e-05	4.43116e-05	4.39368e-05	5.65423e-05	6.35803e-05	7.90878e-05	6.82546e-05	4.95561e-05	5.31266e-05	2.68677e-05	7.44999e-05	3.84884e-05	4.32889e-06	2.52726e-05	2.12394e-05	2.47043e-05
Salimicrobium jeotgali	6.16359e-05	5.4988e-05	7.16135e-05	8.96241e-05	7.49492e-05	8.35877e-05	7.74912e-05	6.35702e-05	5.46944e-05	6.7514e-05	5.56148e-05	4.86867e-05	9.61871e-05	9.96656e-05	8.77745e-05	8.4817e-05	3.26761e-05	5.11006e-05	5.66157e-05	9.13039e-05
Flavobacterium branchiophilum	6.14572e-05	6.66521e-05	5.97015e-05	4.26535e-05	4.59086e-05	7.43561e-05	6.95164e-05	7.31536e-05	5.5154e-05	3.19352e-05	2.94927e-05	4.88316e-05	1.34215e-05	1.11073e-05	2.51945e-05	1.01567e-05	4.60817e-06	1.73113e-05	1.05173e-05	1.12061e-05
Kosmotoga pacifica	6.14572e-05	7.19288e-05	8.56526e-05	8.46162e-05	0.000120858	0.000143005	0.000110444	9.42372e-05	9.92773e-05	9.0876e-05	0.000108175	9.38957e-05	0.000115574	0.000120079	0.000102945	0.000113861	2.52751e-05	6.46164e-05	6.44012e-05	8.11166e-05
Methyloversatilis sp. RAC08	6.14572e-05	6.13755e-05	6.06942e-05	4.67979e-05	4.81692e-05	5.65644e-05	5.89836e-05	6.08549e-05	5.54604e-05	3.75078e-05	3.74979e-05	5.04255e-05	5.94645e-05	4.89322e-05	5.94645e-05	6.41473e-05	1.98989e-05	2.18474e-05	1.87125e-05	2.0502e-05
Flagellimonas sp. HME9304	6.12786e-05	4.47125e-05	3.70121e-05	3.45372e-05	3.6866e-05	3.67585e-05	4.0476e-05	3.8174e-05	3.7995e-05	3.08635e-05	3.54966e-05	3.43415e-05	5.25674e-05	6.01896e-05	2.91227e-05	4.93578e-05	2.81378e-05	2.5828e-05	2.67029e-05	2.36855e-05
Lactobacillus gasseri	6.12786e-05	4.99891e-05	4.53788e-05	3.16015e-05	4.78214e-05	3.89405e-05	5.68771e-05	5.35076e-05	5.85246e-05	7.56585e-05	6.07761e-05	6.79585e-05	3.98916e-05	3.43726e-05	4.80863e-05	3.11827e-05	6.21405e-06	2.2588e-05	1.37954e-05	1.89739e-05
Rhodoplanes sp. Z2-YC6860	6.12786e-05	6.08201e-05	8.79215e-05	6.00947e-05	7.42536e-05	7.04957e-05	7.79426e-05	7.21953e-05	7.85945e-05	6.36561e-05	7.27838e-05	7.65076e-05	3.76546e-05	4.29283e-05	4.07718e-05	4.18739e-05	1.41038e-05	1.90702e-05	1.76198e-05	2.78878e-05
Streptococcus himalayensis	6.12786e-05	5.74875e-05	4.93495e-05	5.64683e-05	6.06897e-05	5.94178e-05	7.10211e-05	7.02786e-05	5.79117e-05	8.42318e-05	5.91961e-05	5.73807e-05	9.05948e-05	9.44122e-05	9.73917e-05	8.33915e-05	7.68029e-06	3.11973e-05	2.38346e-05	2.73784e-05
Allochromatium vinosum	6.10999e-05	6.41527e-05	4.42444e-05	4.93882e-05	5.89508e-05	6.2439e-05	3.95732e-05	4.1688e-05	4.68809e-05	4.26517e-05	5.04536e-05	4.20212e-05	5.90917e-05	4.47294e-05	7.13845e-05	5.27433e-05	1.10317e-05	2.53652e-05	2.37663e-05	2.90339e-05
Egibacter rhizosphaerae	6.10999e-05	5.97092e-05	8.93396e-05	7.04559e-05	6.57327e-05	5.65644e-05	6.80117e-05	7.39522e-05	6.71041e-05	9.32336e-05	8.1421e-05	8.49119e-05	0.000101593	9.63634e-05	9.73917e-05	9.30136e-05	6.7028e-06	2.80498e-05	2.82054e-05	3.31088e-05
Tessaracoccus aquimaris	6.10999e-05	4.80451e-05	4.36771e-05	6.00947e-05	6.05158e-05	5.20325e-05	5.35667e-05	4.61602e-05	4.45828e-05	6.08698e-05	5.74055e-05	5.34684e-05	0.000109049	0.000109272	0.000111344	0.000103705	3.77032e-06	4.20284e-05	2.82737e-05	2.73784e-05
Aquimarina sp. AD1	6.09213e-05	5.52657e-05	2.62346e-05	3.19469e-05	4.29523e-05	3.69263e-05	4.13788e-05	4.4563e-05	4.36636e-05	4.39377e-05	3.96045e-05	5.24541e-05	2.96391e-05	2.85188e-05	3.35927e-05	2.65499e-05	2.57639e-05	2.16622e-05	2.05565e-05	2.71238e-05
Bacillus methanolicus	6.09213e-05	7.24842e-05	6.56575e-05	6.2685e-05	7.68621e-05	7.55311e-05	8.42623e-05	6.26118e-05	5.8831e-05	5.12249e-05	6.07761e-05	6.47707e-05	4.80936e-05	4.8632e-05	4.49709e-05	5.11397e-05	1.44529e-05	3.04567e-05	3.38738e-05	4.21501e-05
Streptococcus cristatus	6.07426e-05	7.41505e-05	7.00536e-05	8.89333e-05	9.44256e-05	5.99213e-05	7.80931e-05	9.07233e-05	9.29958e-05	0.000102021	9.3534e-05	0.000104473	6.30063e-05	7.18973e-05	5.86518e-05	5.89799e-05	6.14423e-06	3.24008e-05	2.04199e-05	2.90339e-05
Streptococcus halotolerans	6.07426e-05	6.55413e-05	7.9413e-05	6.51026e-05	8.59047e-05	7.43561e-05	7.41809e-05	7.84245e-05	8.1965e-05	7.48012e-05	8.60555e-05	6.85381e-05	6.11422e-05	5.35853e-05	5.60781e-05	5.7198e-05	9.0767e-06	1.79593e-05	1.80296e-05	2.43222e-05
Tenacibaculum jejuense	6.07426e-05	7.10956e-05	6.72174e-05	6.56207e-05	6.8689e-05	7.53632e-05	7.43314e-05	5.92576e-05	4.35104e-05	6.85857e-05	4.99269e-05	4.10069e-05	9.46958e-05	0.000117978	8.1679e-05	0.00011208	1.16601e-05	3.31414e-05	2.99811e-05	3.76931e-05
Lactobacillus ginsenosidimutans	6.0564e-05	9.9145e-05	7.7144e-05	9.94672e-05	7.07757e-05	9.21479e-05	0.000114807	8.83274e-05	7.38451e-05	9.96635e-05	9.99592e-05	6.83932e-05	8.66802e-05	9.33615e-05	8.64199e-05	8.55298e-05	1.62682e-05	3.37894e-05	3.65373e-05	4.76258e-05
Paenibacillus terrae	6.0564e-05	8.30374e-05	0.00010423	8.358e-05	8.83392e-05	8.49305e-05	8.74221e-05	7.71467e-05	7.26195e-05	0.000101592	8.48969e-05	7.303e-05	9.50687e-05	8.34549e-05	0.000106874	9.03408e-05	1.50115e-05	3.53631e-05	2.47907e-05	3.24721e-05
Alteromonas macleodii	6.03853e-05	4.52679e-05	5.21857e-05	4.64525e-05	3.66921e-05	4.01154e-05	3.77676e-05	3.19448e-05	2.49725e-05	3.87938e-05	3.26526e-05	3.62252e-05	4.79071e-05	3.96261e-05	3.874e-05	4.84669e-05	1.71061e-05	2.24954e-05	2.73859e-05	3.64197e-05
Cellulomonas sp. PSBB021	6.03853e-05	4.86005e-05	3.37505e-05	4.00632e-05	4.50391e-05	4.21296e-05	3.94227e-05	5.89382e-05	5.42348e-05	3.98654e-05	6.99399e-05	5.82501e-05	5.51771e-05	5.98894e-05	4.45645e-05	4.22303e-05	4.39871e-06	3.27711e-05	1.93955e-05	3.29815e-05
Halioglobus japonicus	6.03853e-05	7.49836e-05	5.27529e-05	7.25281e-05	7.58187e-05	7.16706e-05	4.28835e-05	6.46882e-05	6.95554e-05	8.80897e-05	6.88865e-05	6.63646e-05	3.70954e-05	5.98894e-05	6.12254e-05	4.47249e-05	4.46853e-06	2.49949e-05	1.86443e-05	1.77005e-05
Marinobacterium aestuarii	6.02067e-05	0.000101922	6.23959e-05	7.83995e-05	8.20789e-05	7.2342e-05	8.01997e-05	8.68899e-05	0.000109542	0.000101592	8.83728e-05	0.000127368	0.000102525	0.000107321	0.000129088	0.000113683	1.19394e-05	6.18392e-05	3.67422e-05	2.87792e-05
Massilia oculi	6.0028e-05	6.22087e-05	6.18287e-05	4.81794e-05	6.88628e-05	6.84815e-05	6.15416e-05	5.59034e-05	6.17419e-05	5.40112e-05	5.68788e-05	5.88297e-05	0.000102711	8.10534e-05	8.11372e-05	8.67771e-05	1.76647e-05	2.8235e-05	2.93664e-05	3.52736e-05
Magnetospira sp. QH-2	5.98494e-05	5.27663e-05	3.40341e-05	3.31557e-05	3.94744e-05	3.03803e-05	3.46077e-05	2.89101e-05	2.8343e-05	3.72934e-05	3.3074e-05	2.85455e-05	6.50568e-05	5.10336e-05	7.74799e-05	6.12963e-05	7.81993e-06	1.74964e-05	1.54344e-05	1.42623e-05
Thermomonospora curvata	5.98494e-05	7.41505e-05	7.26062e-05	5.80225e-05	8.15573e-05	6.09284e-05	6.83127e-05	6.00562e-05	7.64496e-05	6.90143e-05	7.83663e-05	7.31749e-05	5.05169e-05	5.34352e-05	5.98708e-05	6.45037e-05	1.46624e-05	3.85106e-05	4.66448e-05	5.64123e-05
Fictibacillus phosphorivorans	5.96707e-05	5.83206e-05	5.21857e-05	6.30304e-05	7.26886e-05	8.39234e-05	6.80117e-05	6.5966e-05	5.94438e-05	6.25844e-05	5.69841e-05	6.21625e-05	7.25132e-05	8.13536e-05	5.22854e-05	6.66419e-05	5.09692e-06	4.60091e-05	2.92298e-05	2.71238e-05
Streptomyces cattleya	5.96707e-05	7.74831e-05	9.14667e-05	6.04401e-05	0.000104512	9.98689e-05	8.84754e-05	8.88066e-05	0.000102495	7.69445e-05	6.78332e-05	9.62141e-05	7.40044e-05	5.41857e-05	6.78627e-05	9.17663e-05	1.53606e-05	3.03642e-05	3.55129e-05	5.09366e-05
Lactobacillus brevis	5.9492e-05	7.02625e-05	6.99118e-05	8.39254e-05	7.44275e-05	8.94624e-05	9.01306e-05	6.67647e-05	5.9597e-05	9.00187e-05	6.89919e-05	6.50605e-05	0.000128809	0.000126083	0.000119064	0.000115109	1.33358e-05	3.92512e-05	4.26154e-05	5.47569e-05
Phaeobacter gallaeciensis	5.9492e-05	5.3044e-05	4.79314e-05	4.09266e-05	5.56467e-05	4.83399e-05	4.15293e-05	5.49451e-05	5.66861e-05	6.51564e-05	6.2356e-05	7.05667e-05	3.41129e-05	2.14641e-05	3.21027e-05	3.65283e-05	1.0892e-05	2.11068e-05	2.11711e-05	3.94759e-05
Salinisphaera sp. LB1	5.9492e-05	7.19288e-05	6.63666e-05	5.02516e-05	7.77315e-05	7.16706e-05	7.04192e-05	6.05354e-05	7.20067e-05	4.97246e-05	6.59373e-05	6.24523e-05	5.85325e-05	5.58368e-05	4.94409e-05	6.094e-05	2.03877e-05	4.16581e-05	3.51031e-05	4.99179e-05
[Mannheimia] succiniciproducens	5.93134e-05	4.97114e-05	4.28263e-05	4.93882e-05	7.75577e-05	6.84815e-05	5.95855e-05	6.16535e-05	5.76053e-05	6.8157e-05	5.91961e-05	5.23092e-05	5.77868e-05	5.67374e-05	5.7839e-05	6.71765e-05	2.08066e-05	2.70315e-05	2.7181e-05	4.0622e-05
Arthrobacter sp. ERGS1:01	5.93134e-05	7.69277e-05	7.16135e-05	4.59345e-05	8.72958e-05	0.000132767	0.000100362	0.000151898	2.65046e-05	2.82916e-05	2.26462e-05	2.85455e-05	4.828e-05	5.74878e-05	5.83808e-05	5.91581e-05	6.63298e-06	5.70254e-05	4.81472e-05	3.17081e-05
Glutamicibacter halophytocola	5.93134e-05	4.55456e-05	4.39608e-05	4.35169e-05	3.56487e-05	2.81983e-05	4.36358e-05	3.33823e-05	3.76886e-05	4.2866e-05	4.24484e-05	4.31804e-05	2.79614e-05	3.27215e-05	2.93936e-05	3.51028e-05	3.42122e-06	8.51677e-06	8.87822e-06	1.05694e-05
Methanoregula formicica	5.93134e-05	6.08201e-05	5.3462e-05	4.93882e-05	5.16471e-05	7.40205e-05	6.12406e-05	5.54242e-05	4.25912e-05	3.25782e-05	4.22378e-05	4.56438e-05	7.68006e-05	6.28914e-05	8.92645e-05	6.69983e-05	1.80836e-05	1.92553e-05	2.88201e-05	4.11313e-05
Methylorubrum populi	5.93134e-05	5.19331e-05	4.70806e-05	3.35011e-05	4.08656e-05	3.64228e-05	3.58115e-05	4.88756e-05	3.29392e-05	8.08025e-05	4.50817e-05	4.01375e-05	4.79071e-05	4.93825e-05	3.02063e-05	5.75544e-05	7.0519e-06	2.47172e-05	1.93955e-05	2.30488e-05
Pseudonocardia sp. HH130630-07	5.93134e-05	4.66565e-05	5.61563e-05	4.67979e-05	4.05178e-05	4.73328e-05	4.46891e-05	4.05699e-05	4.35104e-05	4.4152e-05	4.71883e-05	3.83987e-05	6.43112e-05	5.14839e-05	5.36399e-05	6.14745e-05	5.16674e-06	2.48097e-05	2.33565e-05	2.29215e-05
Zymomonas mobilis	5.91347e-05	4.66565e-05	7.82785e-05	6.16489e-05	4.88648e-05	5.60608e-05	5.85322e-05	4.18477e-05	3.8761e-05	4.4152e-05	4.66617e-05	3.9413e-05	6.0583e-05	5.7788e-05	6.48827e-05	7.18094e-05	1.63381e-05	2.39766e-05	2.45175e-05	2.99253e-05
Lactobacillus hokkaidonensis	5.89561e-05	6.27641e-05	7.30316e-05	6.57934e-05	7.46014e-05	7.18384e-05	6.15416e-05	6.22924e-05	6.44996e-05	5.97981e-05	5.88801e-05	5.23092e-05	6.1515e-05	7.15971e-05	5.02536e-05	5.95145e-05	1.70363e-05	3.7122e-05	3.6469e-05	4.50789e-05
Streptacidiphilus sp. DSM 106435	5.89561e-05	7.33173e-05	6.96282e-05	7.16647e-05	5.63423e-05	5.50538e-05	5.20621e-05	5.89382e-05	6.22015e-05	6.23701e-05	6.88865e-05	5.66562e-05	5.55499e-05	7.51995e-05	5.3369e-05	7.53731e-05	6.14423e-06	2.30508e-05	3.02542e-05	2.73784e-05
Streptomyces sp. 4F	5.89561e-05	7.13733e-05	5.95597e-05	6.76929e-05	5.07777e-05	7.016e-05	5.13097e-05	8.94455e-05	7.92073e-05	8.59464e-05	7.57331e-05	6.89728e-05	5.6482e-05	5.82383e-05	6.02772e-05	6.48601e-05	1.71759e-05	2.98087e-05	2.51322e-05	2.99253e-05
Geobacter sp. M21	5.87774e-05	6.47081e-05	4.76478e-05	5.19785e-05	5.80813e-05	6.4621e-05	6.31967e-05	7.37925e-05	6.37336e-05	4.30804e-05	5.26656e-05	6.41911e-05	7.06491e-05	4.98328e-05	5.40463e-05	5.18524e-05	7.40101e-06	2.34211e-05	1.58442e-05	2.10114e-05
Isoptericola dokdonensis	5.87774e-05	5.6932e-05	6.0127e-05	5.47415e-05	5.77335e-05	4.29688e-05	4.9805e-05	4.83964e-05	5.69925e-05	4.2223e-05	4.12898e-05	4.94112e-05	5.85325e-05	6.30415e-05	6.40699e-05	5.91581e-05	1.42434e-05	4.89715e-05	4.37081e-05	5.04273e-05
Pseudothermotoga thermarum	5.87774e-05	7.02625e-05	8.48017e-05	9.73949e-05	8.83392e-05	9.14765e-05	8.60679e-05	8.12995e-05	9.20766e-05	7.63015e-05	0.000100381	0.0001023	8.31385e-05	6.19908e-05	7.92408e-05	6.64637e-05	2.05273e-05	5.8414e-05	4.31618e-05	6.35435e-05
Xanthobacter autotrophicus	5.87774e-05	5.11e-05	5.58727e-05	5.57776e-05	7.04279e-05	6.00892e-05	6.86136e-05	6.22924e-05	5.66861e-05	8.7018e-05	6.1408e-05	6.01338e-05	6.85986e-05	5.32851e-05	5.21499e-05	6.21873e-05	1.97593e-05	3.88809e-05	3.80397e-05	3.48916e-05
Actinomyces sp. oral taxon 414	5.85988e-05	7.27619e-05	7.91294e-05	7.4255e-05	8.15573e-05	8.25806e-05	8.66698e-05	7.6987e-05	7.18535e-05	9.47339e-05	8.16316e-05	8.25935e-05	9.93561e-05	8.13536e-05	9.08899e-05	8.73116e-05	1.00542e-05	2.69389e-05	2.62249e-05	3.34908e-05
Azospirillum brasilense	5.85988e-05	6.30418e-05	4.5237e-05	4.1272e-05	4.83431e-05	5.10254e-05	4.64947e-05	4.85561e-05	4.97918e-05	4.97246e-05	4.46604e-05	4.76724e-05	6.63617e-05	7.35484e-05	5.98708e-05	7.50167e-05	4.88746e-06	1.29603e-05	1.5093e-05	1.97379e-05
Alloactinosynnema sp. L-07	5.84201e-05	7.49836e-05	6.84937e-05	8.99694e-05	7.92966e-05	6.27747e-05	6.25949e-05	7.523e-05	8.80933e-05	7.60872e-05	6.78332e-05	8.11445e-05	5.68548e-05	5.41857e-05	6.50181e-05	5.59507e-05	1.04731e-05	2.9531e-05	2.65664e-05	3.17081e-05
Caldicellulosiruptor hydrothermalis	5.84201e-05	7.27619e-05	5.92761e-05	4.92155e-05	6.95584e-05	5.67322e-05	6.45509e-05	6.80424e-05	6.31207e-05	5.97981e-05	6.49893e-05	7.75219e-05	7.90375e-05	5.94391e-05	8.07308e-05	6.21873e-05	3.28158e-06	2.73092e-05	1.66637e-05	1.5281e-05
Desulfomicrobium orale	5.82415e-05	4.91559e-05	5.65817e-05	6.37211e-05	7.30364e-05	5.62287e-05	6.83127e-05	7.21953e-05	6.87893e-05	7.78018e-05	7.81557e-05	5.9844e-05	8.53754e-05	0.000110022	9.61726e-05	8.2857e-05	2.63923e-05	3.36042e-05	2.12394e-05	3.56556e-05
Meiothermus ruber	5.82415e-05	7.88717e-05	7.99802e-05	7.58092e-05	9.49473e-05	9.04694e-05	9.70521e-05	9.24802e-05	6.94022e-05	6.17271e-05	6.21454e-05	7.02769e-05	8.64938e-05	9.89151e-05	7.91054e-05	0.000112436	1.34754e-05	3.72146e-05	2.92981e-05	4.30415e-05
Nocardiopsis dassonvillei	5.82415e-05	5.74875e-05	5.60145e-05	7.90902e-05	7.16452e-05	6.61316e-05	6.83127e-05	4.52019e-05	5.07111e-05	6.00124e-05	5.31922e-05	4.60785e-05	6.99034e-05	7.50494e-05	7.13845e-05	6.14745e-05	2.99531e-05	5.2767e-05	4.82838e-05	4.60977e-05
Sinorhizobium fredii	5.82415e-05	6.47081e-05	5.21857e-05	7.87448e-05	7.73838e-05	6.4621e-05	6.07892e-05	5.47853e-05	6.38868e-05	5.61545e-05	6.04601e-05	5.65113e-05	5.14489e-05	4.81817e-05	4.37518e-05	3.8132e-05	3.90997e-06	4.0177e-05	2.58151e-05	3.43822e-05
Actinomadura amylolytica	5.80628e-05	7.91494e-05	7.9413e-05	9.13509e-05	0.000102599	7.85523e-05	9.22371e-05	7.92231e-05	9.42215e-05	7.84448e-05	0.000105331	8.3318e-05	4.64159e-05	6.78447e-05	5.40463e-05	6.36128e-05	5.79513e-06	4.11027e-05	3.27128e-05	4.18954e-05
Comamonas testosteroni	5.80628e-05	3.16598e-05	5.74326e-05	2.78025e-05	6.15592e-05	2.92053e-05	3.23507e-05	2.22016e-05	3.41649e-05	7.78018e-05	3.79192e-05	2.10106e-05	3.97051e-05	2.29651e-05	3.45409e-05	2.58371e-05	3.21176e-06	1.3238e-05	1.13368e-05	1.51537e-05
Methylorubrum extorquens	5.80628e-05	4.47125e-05	5.60145e-05	5.18058e-05	5.30383e-05	4.76685e-05	5.74789e-05	4.10491e-05	4.61149e-05	3.40785e-05	5.07696e-05	4.66581e-05	6.09558e-05	6.8295e-05	5.3369e-05	6.50383e-05	1.03335e-05	3.00864e-05	2.64298e-05	2.67417e-05
Morganella morganii	5.80628e-05	6.80407e-05	6.60829e-05	8.39254e-05	6.85151e-05	6.21033e-05	6.6808e-05	6.22924e-05	6.15887e-05	5.27252e-05	6.08814e-05	6.95524e-05	8.33249e-05	7.83516e-05	8.39817e-05	6.39691e-05	8.44832e-06	3.22156e-05	2.15126e-05	2.69964e-05
Streptomyces sp. SCSIO 03032	5.80628e-05	8.0538e-05	3.95647e-05	5.24966e-05	6.05158e-05	6.94886e-05	6.21434e-05	6.51674e-05	5.91374e-05	5.93695e-05	7.09932e-05	5.30337e-05	7.71734e-05	9.81646e-05	5.43172e-05	7.37694e-05	3.84014e-06	2.68464e-05	2.14443e-05	2.34309e-05
Brevibacterium aurantiacum	5.78842e-05	5.05445e-05	3.97065e-05	4.24808e-05	5.94725e-05	4.29688e-05	5.34163e-05	4.50422e-05	5.22431e-05	5.50829e-05	4.7715e-05	4.60785e-05	4.5111e-05	4.45793e-05	6.02772e-05	4.77541e-05	1.0892e-05	2.47172e-05	1.98053e-05	2.36855e-05
Marinobacter salarius	5.78842e-05	6.55413e-05	6.14033e-05	7.32189e-05	6.53849e-05	6.49567e-05	6.1692e-05	6.19729e-05	7.04746e-05	4.7367e-05	7.15198e-05	6.41911e-05	3.54177e-05	3.9476e-05	3.129e-05	4.22303e-05	5.86495e-06	3.36042e-05	1.96687e-05	2.68691e-05
Marinomonas mediterranea	5.78842e-05	7.13733e-05	7.11881e-05	4.7316e-05	7.37319e-05	6.69709e-05	6.15416e-05	5.92576e-05	5.02515e-05	4.52237e-05	5.42455e-05	5.88297e-05	6.93442e-05	8.48058e-05	7.88345e-05	7.44822e-05	6.14423e-06	1.1294e-05	1.30441e-05	1.71911e-05
Martelella endophytica	5.78842e-05	7.13733e-05	6.48067e-05	8.34074e-05	6.41677e-05	5.06897e-05	5.98864e-05	6.72438e-05	8.10458e-05	0.00010888	8.05783e-05	7.85362e-05	5.85325e-05	4.47294e-05	4.30745e-05	5.54162e-05	4.25907e-06	2.07365e-05	1.65271e-05	2.54683e-05
Pseudomonas entomophila	5.78842e-05	5.22108e-05	4.05573e-05	0.000100331	3.30403e-05	3.55835e-05	4.22816e-05	3.97713e-05	4.07527e-05	4.37234e-05	3.40219e-05	3.5066e-05	3.01983e-05	3.52732e-05	4.33454e-05	3.02918e-05	7.40101e-06	3.30488e-05	1.70052e-05	2.21574e-05
Schaalia meyeri	5.78842e-05	7.665e-05	6.4523e-05	4.88701e-05	8.034e-05	5.60608e-05	5.76294e-05	4.98339e-05	8.47227e-05	5.22966e-05	6.03547e-05	7.52035e-05	6.31927e-05	4.59302e-05	5.90581e-05	6.14745e-05	6.91226e-06	1.99959e-05	2.23321e-05	2.73784e-05
Streptomonospora sp. M2	5.78842e-05	6.69299e-05	5.74326e-05	6.2685e-05	3.80832e-05	4.64936e-05	5.462e-05	4.24866e-05	4.21316e-05	4.43663e-05	5.31922e-05	5.08602e-05	6.85986e-05	8.13536e-05	6.24445e-05	6.53946e-05	5.79513e-06	2.52726e-05	3.1142e-05	3.59103e-05
Streptomyces glaucescens	5.78842e-05	6.44304e-05	5.58727e-05	6.45846e-05	4.74736e-05	6.17676e-05	6.33472e-05	6.93202e-05	8.13522e-05	6.36561e-05	5.81428e-05	6.47707e-05	2.7775e-05	3.81251e-05	2.62782e-05	2.9579e-05	4.67799e-06	2.21251e-05	2.28785e-05	1.84645e-05
Arthrospira sp. TJSD092	5.77055e-05	7.88717e-05	7.0479e-05	7.49457e-05	8.17312e-05	0.000103561	6.77108e-05	6.40493e-05	7.75221e-05	7.48012e-05	6.67799e-05	6.27421e-05	7.2886e-05	6.90455e-05	7.35517e-05	6.48601e-05	1.50115e-05	3.75849e-05	3.73568e-05	5.24647e-05
Bacillus muralis	5.77055e-05	4.61011e-05	4.72224e-05	2.90113e-05	2.3476e-05	4.3808e-05	4.12283e-05	3.83338e-05	3.47777e-05	4.13657e-05	3.73925e-05	3.63701e-05	4.86528e-05	4.44292e-05	5.13372e-05	5.39907e-05	2.04575e-05	3.15676e-05	3.53763e-05	5.09366e-05
Dechloromonas aromatica	5.77055e-05	5.41549e-05	4.55207e-05	5.52595e-05	4.81692e-05	3.62549e-05	4.40872e-05	4.80769e-05	5.46944e-05	5.29395e-05	4.9611e-05	4.47744e-05	4.52974e-05	3.4973e-05	4.60545e-05	3.51028e-05	2.63224e-05	3.48077e-05	2.64298e-05	3.15807e-05
Pseudomonas mendocina	5.77055e-05	4.91559e-05	5.51637e-05	5.83679e-05	7.84271e-05	7.40205e-05	7.1322e-05	6.42091e-05	6.63381e-05	6.36561e-05	5.50882e-05	7.02769e-05	4.86528e-05	5.71876e-05	5.02536e-05	5.73762e-05	1.2079e-05	3.26785e-05	2.58151e-05	3.24721e-05
Streptomyces albus	5.77055e-05	6.88739e-05	7.28898e-05	6.00947e-05	8.06878e-05	7.28455e-05	6.47014e-05	6.08549e-05	7.84413e-05	5.05819e-05	6.01441e-05	8.08547e-05	6.71073e-05	7.83516e-05	7.55836e-05	7.6264e-05	4.74781e-05	5.69328e-05	5.9484e-05	5.78131e-05
Thermovibrio ammonificans	5.77055e-05	6.19309e-05	6.09778e-05	4.97336e-05	6.48632e-05	5.79072e-05	6.60556e-05	5.92576e-05	3.75354e-05	5.31539e-05	5.05589e-05	3.99926e-05	7.25132e-05	7.83516e-05	7.24681e-05	6.53946e-05	1.10317e-05	2.64761e-05	2.34931e-05	2.86519e-05
Vibrio campbellii	5.77055e-05	6.24864e-05	4.66551e-05	7.51184e-05	7.18191e-05	5.99213e-05	5.92845e-05	6.42091e-05	5.76053e-05	7.18006e-05	6.21454e-05	6.62197e-05	4.60431e-05	6.40922e-05	5.97354e-05	6.05836e-05	3.00229e-06	3.34191e-05	2.0215e-05	2.16481e-05
Bordetella genomosp. 9	5.75268e-05	3.05489e-05	4.24009e-05	2.33126e-05	3.54748e-05	4.51508e-05	3.46077e-05	3.59379e-05	3.43181e-05	3.77221e-05	4.36071e-05	3.75293e-05	4.19421e-05	5.20843e-05	3.129e-05	4.29431e-05	9.91455e-06	1.26826e-05	1.71418e-05	1.57904e-05
Gramella salexigens	5.75268e-05	4.27685e-05	4.39608e-05	4.42076e-05	3.0084e-05	5.52216e-05	6.28958e-05	6.90008e-05	5.04047e-05	3.57931e-05	3.03354e-05	5.23092e-05	7.64277e-06	8.70573e-06	1.05654e-05	7.48385e-06	7.19154e-06	8.05391e-06	8.40016e-06	7.51315e-06
Polynucleobacter necessarius	5.75268e-05	3.33261e-05	5.31783e-05	4.29988e-05	5.51251e-05	3.81012e-05	4.499e-05	2.92295e-05	3.56969e-05	5.61545e-05	4.17111e-05	4.52091e-05	5.10761e-05	4.44292e-05	4.99827e-05	5.25652e-05	2.12255e-05	2.18474e-05	1.91223e-05	2.89065e-05
Rhizobiales bacterium PAMC 29148	5.75268e-05	5.47103e-05	6.36722e-05	5.54322e-05	8.66002e-05	5.90821e-05	6.89145e-05	5.62229e-05	4.90258e-05	6.53707e-05	5.46668e-05	4.52091e-05	6.07694e-05	5.9289e-05	7.34163e-05	6.53946e-05	5.79513e-06	4.51759e-05	3.5308e-05	3.6165e-05
Acidobacterium capsulatum	5.73482e-05	5.44326e-05	6.22541e-05	4.179e-05	5.58206e-05	6.26069e-05	6.71089e-05	6.82022e-05	4.65745e-05	4.88673e-05	4.5187e-05	4.66581e-05	9.35774e-05	0.00010657	7.31454e-05	9.55082e-05	3.12099e-05	3.86958e-05	3.90641e-05	4.30415e-05
Anderseniella sp. Alg231-50	5.73482e-05	4.77674e-05	6.42394e-05	4.59345e-05	3.86049e-05	5.42145e-05	6.33472e-05	3.62574e-05	3.58501e-05	4.52237e-05	3.62339e-05	3.23129e-05	4.26877e-05	4.14273e-05	3.02063e-05	4.36558e-05	1.80836e-05	2.18474e-05	3.02542e-05	3.41276e-05
Bibersteinia trehalosi	5.73482e-05	5.63766e-05	5.89925e-05	7.56365e-05	5.26905e-05	4.44794e-05	3.88208e-05	5.82993e-05	6.38868e-05	8.16598e-05	5.71948e-05	6.62197e-05	3.6909e-05	3.09204e-05	4.25327e-05	3.17173e-05	8.16903e-06	1.37935e-05	1.03124e-05	1.22248e-05
Blastococcus saxobsidens	5.73482e-05	6.02646e-05	7.28898e-05	5.23239e-05	6.95584e-05	9.06373e-05	7.8394e-05	6.46882e-05	8.61016e-05	6.4942e-05	6.80439e-05	6.2887e-05	6.71073e-05	5.94391e-05	5.74327e-05	7.00275e-05	5.65549e-06	5.60071e-05	4.8079e-05	3.83298e-05
Fusobacterium hwasookii	5.73482e-05	6.47081e-05	7.03372e-05	8.89333e-05	7.96444e-05	5.28718e-05	5.38677e-05	8.41746e-05	0.000100503	7.80162e-05	0.000103646	0.000100706	8.55618e-05	8.27044e-05	7.97826e-05	8.69553e-05	4.18925e-06	4.7768e-05	3.05957e-05	3.59103e-05
Halioglobus pacificus	5.73482e-05	4.99891e-05	4.90659e-05	4.4553e-05	4.79953e-05	4.12903e-05	4.0476e-05	3.7056e-05	4.41232e-05	4.65096e-05	3.74979e-05	4.07171e-05	6.0583e-05	4.99829e-05	4.41581e-05	5.4347e-05	1.78741e-05	2.26805e-05	1.59125e-05	2.44496e-05
Amycolatopsis sp. BJA-103	5.71695e-05	3.91581e-05	3.47432e-05	4.74887e-05	4.39957e-05	3.64228e-05	3.68648e-05	2.89101e-05	3.49309e-05	3.90081e-05	3.85512e-05	3.23129e-05	3.48585e-05	5.10336e-05	3.63018e-05	4.45467e-05	3.14194e-06	2.4532e-05	1.29759e-05	1.98653e-05
Candidatus Accumulibacter phosphatis	5.71695e-05	9.85896e-05	9.2743e-05	9.39412e-05	7.1993e-05	7.72095e-05	9.55474e-05	5.75007e-05	5.66861e-05	9.13046e-05	6.22507e-05	5.9844e-05	8.27657e-05	7.80514e-05	6.24445e-05	8.39261e-05	1.36849e-05	3.16602e-05	2.89566e-05	3.15807e-05
Candidatus Paracaedibacter acanthamoebae	5.71695e-05	4.33239e-05	1.97114e-05	3.21196e-05	3.0084e-05	2.92053e-05	3.52096e-05	2.93892e-05	2.2368e-05	2.25047e-05	1.98022e-05	2.6227e-05	3.85867e-05	3.82752e-05	1.43582e-05	2.69062e-05	4.95728e-06	1.46266e-05	6.96598e-06	9.55062e-06
Methylobacterium sp. 4-46	5.69909e-05	7.77608e-05	4.48116e-05	4.97336e-05	8.08617e-05	6.99921e-05	6.18425e-05	5.39867e-05	6.29675e-05	7.65159e-05	6.46733e-05	5.78154e-05	5.29402e-05	5.23845e-05	6.54245e-05	7.09184e-05	4.95728e-06	2.57355e-05	2.00784e-05	2.43222e-05
Mycolicibacterium hassiacum	5.69909e-05	5.16554e-05	6.21123e-05	7.04559e-05	6.31243e-05	5.33753e-05	4.79994e-05	5.95771e-05	6.0363e-05	8.59464e-05	6.50946e-05	5.9844e-05	4.11964e-05	3.85754e-05	3.06127e-05	4.3834e-05	1.50813e-05	1.89776e-05	2.52005e-05	3.48916e-05
Pseudodesulfovibrio aespoeensis	5.69909e-05	6.83184e-05	7.99802e-05	8.53069e-05	7.12974e-05	7.41883e-05	6.56042e-05	9.56747e-05	8.76336e-05	8.27314e-05	8.83728e-05	7.98404e-05	7.2886e-05	8.13536e-05	5.9329e-05	7.16312e-05	6.63298e-06	4.1473e-05	2.88201e-05	3.1326e-05
Pseudomonas sp. LTJR-52	5.69909e-05	5.22108e-05	5.98434e-05	6.38938e-05	6.03419e-05	5.95856e-05	5.88331e-05	6.42091e-05	6.69509e-05	6.04411e-05	7.13092e-05	6.10032e-05	6.1515e-05	5.82383e-05	5.49945e-05	5.00705e-05	1.26376e-05	2.75869e-05	2.88883e-05	3.24721e-05
Sphingomonas koreensis	5.69909e-05	7.49836e-05	7.24643e-05	6.8729e-05	9.39039e-05	9.56727e-05	4.42377e-05	5.60631e-05	7.18535e-05	3.83651e-05	4.95056e-05	5.52072e-05	3.48585e-05	4.92324e-05	5.02536e-05	5.54162e-05	5.0271e-06	2.12919e-05	1.35905e-05	1.77005e-05
Streptomyces lavendulae	5.69909e-05	6.60967e-05	6.57993e-05	5.85406e-05	7.84271e-05	6.09284e-05	6.00369e-05	7.13966e-05	6.94022e-05	9.17333e-05	7.35211e-05	6.67993e-05	9.7492e-05	7.24977e-05	8.58781e-05	9.39045e-05	7.40101e-06	3.11973e-05	3.15518e-05	3.17081e-05
Campylobacter hominis	5.66336e-05	4.97114e-05	6.3814e-05	6.51026e-05	5.98203e-05	5.79072e-05	5.89836e-05	6.91605e-05	8.1965e-05	9.38766e-05	8.88995e-05	7.53484e-05	5.07033e-05	3.78249e-05	4.56481e-05	5.13179e-05	1.94102e-05	3.04567e-05	3.88593e-05	4.97906e-05
Cellulophaga lytica	5.66336e-05	5.35994e-05	4.92077e-05	4.42076e-05	4.27784e-05	5.55573e-05	5.70275e-05	6.05354e-05	5.83714e-05	4.09371e-05	4.26591e-05	5.68011e-05	3.24352e-05	4.41291e-05	4.22618e-05	2.99354e-05	2.6881e-05	2.90681e-05	2.75908e-05	3.03073e-05
Cutibacterium avidum	5.66336e-05	6.63744e-05	5.40292e-05	6.40665e-05	4.95604e-05	4.8172e-05	6.66575e-05	4.18477e-05	4.12123e-05	6.57994e-05	5.32975e-05	5.24541e-05	6.33791e-05	7.21975e-05	5.21499e-05	6.50383e-05	5.65549e-06	2.8235e-05	1.5571e-05	2.54683e-05
Nonlabens dokdonensis	5.66336e-05	5.99869e-05	4.48116e-05	3.09108e-05	3.87788e-05	4.43116e-05	5.83817e-05	4.75978e-05	3.30924e-05	3.68648e-05	4.19218e-05	4.43397e-05	3.01983e-05	3.90257e-05	3.56245e-05	4.3834e-05	5.58566e-06	1.79593e-05	1.34539e-05	1.59177e-05
Nitrospira defluvii	5.64549e-05	7.91494e-05	5.74326e-05	5.71591e-05	7.91227e-05	7.35169e-05	8.95287e-05	8.92857e-05	6.64913e-05	6.9443e-05	7.40478e-05	7.85362e-05	7.6987e-05	7.70007e-05	7.77508e-05	6.68201e-05	1.19394e-05	5.5359e-05	3.71519e-05	3.47643e-05
Pseudomonas syringae	5.64549e-05	5.19331e-05	6.32468e-05	5.336e-05	9.07738e-05	6.5796e-05	7.88454e-05	8.35357e-05	7.53772e-05	5.82978e-05	8.74248e-05	9.0563e-05	5.98373e-05	7.24977e-05	4.91699e-05	6.75329e-05	2.72301e-05	2.86053e-05	4.52789e-05	6.02326e-05
Streptomyces albulus	5.64549e-05	7.08179e-05	3.89974e-05	6.00947e-05	9.42517e-05	7.90559e-05	6.92155e-05	7.42717e-05	7.43047e-05	6.6871e-05	7.45744e-05	9.07079e-05	3.70954e-05	4.27782e-05	5.4859e-05	3.65283e-05	2.86265e-06	4.73977e-05	3.18933e-05	2.99253e-05
Actinomyces sp. 410	5.62763e-05	5.97092e-05	7.09044e-05	6.30304e-05	7.66882e-05	7.016e-05	7.28267e-05	7.2355e-05	8.30375e-05	6.92286e-05	8.76355e-05	8.23037e-05	7.6987e-05	6.57433e-05	7.09781e-05	7.82241e-05	6.21405e-06	4.36948e-05	4.19325e-05	3.46369e-05
Mycobacteroides abscessus	5.62763e-05	6.16532e-05	4.58043e-05	5.3878e-05	5.25166e-05	5.48859e-05	4.31844e-05	5.6702e-05	5.97502e-05	5.31539e-05	7.21518e-05	6.10032e-05	3.87731e-05	4.12772e-05	3.06127e-05	3.6172e-05	4.18925e-06	1.97182e-05	2.08297e-05	2.76331e-05
Niveispirillum cyanobacteriorum	5.62763e-05	4.74896e-05	6.69338e-05	4.07539e-05	5.59945e-05	5.62287e-05	6.44005e-05	6.34104e-05	4.01399e-05	3.85794e-05	4.30804e-05	4.72377e-05	8.18336e-05	8.39052e-05	6.40699e-05	8.65989e-05	1.27772e-05	4.35096e-05	3.54446e-05	4.63523e-05
Sulfuritalea hydrogenivorans	5.62763e-05	6.66521e-05	7.03372e-05	6.25123e-05	6.59066e-05	5.1529e-05	7.47828e-05	6.948e-05	5.59201e-05	5.42255e-05	6.69906e-05	6.99871e-05	0.000141857	0.000126984	0.000154689	0.000151637	1.71759e-05	2.36063e-05	2.91615e-05	3.29815e-05
Achromobacter spanius	5.60976e-05	6.16532e-05	5.92761e-05	7.39096e-05	6.88628e-05	5.27039e-05	6.13911e-05	6.90008e-05	6.02098e-05	8.18741e-05	6.96239e-05	8.11445e-05	6.22607e-05	6.21409e-05	5.79745e-05	6.02272e-05	6.07441e-06	3.39745e-05	2.3698e-05	3.08167e-05
Hyphomonas neptunium	5.60976e-05	5.72097e-05	6.29631e-05	4.95609e-05	5.33861e-05	4.34723e-05	4.22816e-05	4.37644e-05	4.51957e-05	4.82243e-05	4.79257e-05	4.76724e-05	3.97051e-05	4.83318e-05	2.98e-05	4.77541e-05	9.00688e-06	2.11994e-05	2.0898e-05	2.03747e-05
Nocardioides sp. 78	5.60976e-05	7.22065e-05	5.33201e-05	3.86817e-05	7.30364e-05	5.69001e-05	5.2363e-05	4.4563e-05	6.14355e-05	5.65832e-05	5.62468e-05	5.92644e-05	3.31808e-05	3.7975e-05	4.45645e-05	4.00921e-05	2.30409e-06	1.3238e-05	9.56116e-06	1.69364e-05
Persephonella marina	5.60976e-05	6.72076e-05	6.3105e-05	6.78656e-05	7.11235e-05	6.61316e-05	6.78612e-05	6.50077e-05	4.64213e-05	5.20822e-05	5.68788e-05	5.57868e-05	8.66802e-05	7.8952e-05	9.96944e-05	9.06972e-05	2.72301e-05	3.53631e-05	3.68787e-05	4.08767e-05
Acaryochloris marina	5.59189e-05	6.9707e-05	8.45181e-05	7.7536e-05	0.000102077	8.59376e-05	8.74221e-05	6.70841e-05	6.77169e-05	8.8947e-05	8.26849e-05	6.05685e-05	7.13947e-05	7.88019e-05	6.33927e-05	6.45037e-05	1.43133e-05	3.70295e-05	3.14152e-05	4.73711e-05
Rhodospirillum centenum	5.59189e-05	4.63788e-05	7.79949e-05	5.81952e-05	6.50371e-05	6.09284e-05	5.74789e-05	5.07922e-05	4.9945e-05	4.92959e-05	6.2356e-05	4.78173e-05	4.45518e-05	4.80316e-05	6.28508e-05	4.6685e-05	8.58796e-06	3.12899e-05	2.69761e-05	3.00526e-05
Chloroflexus aggregans	5.57403e-05	6.19309e-05	6.65084e-05	5.64683e-05	6.29504e-05	6.36139e-05	6.04883e-05	4.29658e-05	4.62681e-05	6.21557e-05	3.98152e-05	6.08583e-05	7.45637e-05	4.33786e-05	7.4229e-05	4.40122e-05	1.08222e-05	2.80498e-05	3.07323e-05	4.73711e-05
Flavobacterium indicum	5.57403e-05	6.41527e-05	6.25377e-05	5.3878e-05	4.20829e-05	5.13611e-05	4.87518e-05	3.21045e-05	3.15604e-05	2.1433e-05	3.2758e-05	3.60803e-05	2.16235e-05	2.95695e-05	2.41109e-05	2.01351e-05	3.14194e-06	7.59104e-06	1.05856e-05	8.2772e-06
Lactobacillus alimentarius	5.57403e-05	5.66543e-05	5.65817e-05	4.80067e-05	6.20809e-05	6.00892e-05	7.1623e-05	5.46256e-05	5.4388e-05	6.47277e-05	5.41402e-05	6.11481e-05	5.77868e-05	5.53865e-05	6.90817e-05	5.39907e-05	1.31961e-05	2.85127e-05	2.34931e-05	3.41276e-05
Enterococcus thailandicus	5.55616e-05	4.61011e-05	8.19655e-05	4.52437e-05	5.61684e-05	5.23682e-05	5.38677e-05	4.15283e-05	4.56553e-05	5.40112e-05	4.84523e-05	4.28906e-05	7.3818e-05	5.56867e-05	8.39817e-05	6.43255e-05	2.01084e-05	3.24933e-05	3.64007e-05	4.96632e-05
Rubrobacter xylanophilus	5.55616e-05	6.41527e-05	6.39558e-05	5.56049e-05	8.06878e-05	8.22449e-05	7.1623e-05	6.29313e-05	5.9597e-05	7.99451e-05	6.05654e-05	5.73807e-05	7.12083e-05	0.000105069	8.42526e-05	0.000106021	2.18539e-05	5.23041e-05	5.14254e-05	6.81278e-05
Streptomyces sp. SAT1	5.55616e-05	4.61011e-05	6.25377e-05	5.21512e-05	6.22548e-05	5.77393e-05	5.58238e-05	5.39867e-05	5.69925e-05	4.84386e-05	5.22442e-05	5.53521e-05	4.15692e-05	2.7318e-05	4.07718e-05	4.27649e-05	1.36849e-05	2.13845e-05	2.67712e-05	3.66744e-05
Sulfurifustis variabilis	5.55616e-05	6.33195e-05	7.3457e-05	5.9404e-05	5.1821e-05	4.91791e-05	5.32658e-05	4.79172e-05	4.85662e-05	4.52237e-05	4.88736e-05	4.86867e-05	6.89714e-05	6.94957e-05	6.89463e-05	6.91366e-05	1.38245e-05	3.52706e-05	2.71127e-05	4.02399e-05
Formosa sp. Hel1_33_131	5.5383e-05	5.6932e-05	8.13983e-05	4.97336e-05	3.80832e-05	6.93207e-05	5.50714e-05	6.50077e-05	3.24796e-05	1.73607e-05	1.66423e-05	3.30374e-05	1.88273e-05	1.68111e-05	1.788e-05	1.96006e-05	3.56784e-05	3.73072e-05	5.62059e-05	7.81877e-05
Lactobacillus rhamnosus	5.5383e-05	5.74875e-05	7.13299e-05	7.30462e-05	8.034e-05	8.79517e-05	7.43314e-05	6.85216e-05	6.84829e-05	5.78691e-05	6.06707e-05	5.56419e-05	7.00898e-05	8.43555e-05	7.97826e-05	8.30351e-05	1.44529e-05	3.03642e-05	3.63324e-05	4.1004e-05
Desulfurella acetivorans	5.52043e-05	6.41527e-05	5.23275e-05	6.99378e-05	6.88628e-05	6.71387e-05	7.388e-05	5.25492e-05	4.90258e-05	6.98716e-05	4.9295e-05	4.46295e-05	3.93323e-05	5.50863e-05	3.427e-05	3.88448e-05	1.26376e-05	5.38779e-05	3.76983e-05	4.92812e-05
Gloeobacter kilaueensis	5.52043e-05	6.22087e-05	6.96282e-05	6.95925e-05	8.88609e-05	9.70155e-05	9.35913e-05	8.24176e-05	9.37619e-05	7.03003e-05	7.19412e-05	7.91158e-05	7.7919e-05	8.00027e-05	6.46118e-05	6.04054e-05	2.10161e-05	3.41597e-05	3.05274e-05	5.1828e-05
Gallibacterium anatis	5.50257e-05	5.3044e-05	6.3814e-05	6.33758e-05	6.39938e-05	8.02308e-05	8.14034e-05	6.42091e-05	8.62548e-05	6.38704e-05	7.83663e-05	7.303e-05	0.000104576	8.79579e-05	6.98945e-05	8.35697e-05	2.11557e-05	3.5178e-05	3.03225e-05	5.48842e-05
Streptococcus iniae	5.50257e-05	5.41549e-05	7.47333e-05	7.13193e-05	4.95604e-05	5.5893e-05	5.67266e-05	6.38896e-05	5.34688e-05	7.22293e-05	5.65628e-05	6.01338e-05	4.75343e-05	5.82383e-05	5.6349e-05	4.90014e-05	1.948e-05	2.83275e-05	4.40496e-05	5.31014e-05
Chromobacterium rhizoryzae	5.4847e-05	6.35972e-05	6.96282e-05	6.06128e-05	5.84291e-05	5.33753e-05	6.80117e-05	6.56466e-05	8.82465e-05	8.7018e-05	8.19476e-05	7.38994e-05	7.32588e-05	8.07532e-05	8.0189e-05	7.57295e-05	1.4802e-05	2.67538e-05	3.20982e-05	2.90339e-05
Clostridium autoethanogenum	5.4847e-05	7.30396e-05	5.44546e-05	6.30304e-05	6.08636e-05	4.54865e-05	5.89836e-05	4.23269e-05	3.86078e-05	7.20149e-05	6.204e-05	4.88316e-05	0.000152855	0.000129235	0.000154824	0.00014647	1.95498e-06	1.61078e-05	9.83433e-06	1.24795e-05
Olleya sp. Bg11-27	5.4847e-05	5.3044e-05	3.46014e-05	2.55575e-05	3.3388e-05	4.91791e-05	4.87518e-05	6.93202e-05	3.14072e-05	2.079e-05	2.23302e-05	3.52109e-05	1.15574e-05	1.09572e-05	1.90991e-05	8.01841e-06	2.93247e-06	1.55524e-05	9.42457e-06	1.10787e-05
Roseateles depolymerans	5.4847e-05	4.55456e-05	5.4171e-05	7.58092e-05	6.55588e-05	6.76423e-05	5.22125e-05	4.7438e-05	5.10175e-05	6.85857e-05	6.15134e-05	5.21643e-05	3.97051e-05	4.77314e-05	4.10427e-05	4.6685e-05	2.05273e-05	3.87884e-05	5.03327e-05	6.04873e-05
Bosea sp. RAC05	5.46684e-05	6.47081e-05	6.11196e-05	5.81952e-05	6.71239e-05	6.64673e-05	5.35667e-05	5.01534e-05	6.18951e-05	5.95838e-05	4.95056e-05	5.79603e-05	5.49907e-05	5.86886e-05	5.74327e-05	5.82671e-05	6.77262e-06	3.47151e-05	3.05274e-05	2.67417e-05
Candidatus Filomicrobium marinum	5.46684e-05	5.44326e-05	4.96331e-05	5.80225e-05	4.26045e-05	4.64936e-05	4.51405e-05	4.07296e-05	3.89142e-05	3.83651e-05	4.37124e-05	3.43415e-05	4.54838e-05	4.78815e-05	4.72736e-05	4.08048e-05	6.14423e-06	2.63835e-05	2.15809e-05	2.26668e-05
Chryseobacterium camelliae	5.46684e-05	5.08223e-05	4.66551e-05	5.49142e-05	3.35619e-05	4.43116e-05	3.89713e-05	5.01534e-05	2.6811e-05	4.75813e-05	2.93874e-05	2.97047e-05	2.62837e-05	2.04134e-05	3.91463e-05	2.24516e-05	2.73698e-05	3.54557e-05	2.80005e-05	3.40002e-05
Intrasporangium calvum	5.46684e-05	6.02646e-05	6.63666e-05	5.68137e-05	6.03419e-05	5.43824e-05	5.41686e-05	4.90353e-05	6.18951e-05	5.05819e-05	5.58255e-05	5.78154e-05	4.95848e-05	5.07334e-05	5.40463e-05	5.39907e-05	6.42351e-06	2.42543e-05	2.30834e-05	2.89065e-05
Labrenzia sp. VG12	5.46684e-05	5.74875e-05	6.42394e-05	6.75202e-05	6.22548e-05	6.34461e-05	6.62061e-05	8.24176e-05	8.5642e-05	8.959e-05	8.0473e-05	8.52017e-05	4.9212e-05	3.69243e-05	4.41581e-05	5.11397e-05	5.30638e-06	1.3238e-05	1.02441e-05	1.40076e-05
Lactobacillus sakei	5.46684e-05	8.49815e-05	9.16085e-05	9.89491e-05	0.00010312	8.14057e-05	8.5767e-05	9.45566e-05	9.37619e-05	0.000100092	9.94326e-05	8.14343e-05	0.00011837	8.54062e-05	0.000108634	9.60428e-05	1.69665e-05	4.73977e-05	3.72202e-05	5.50116e-05
Sanguibacter keddieii	5.46684e-05	6.02646e-05	5.30365e-05	5.76771e-05	6.53849e-05	5.60608e-05	7.07201e-05	7.2355e-05	6.43464e-05	8.16598e-05	6.3304e-05	7.63627e-05	6.4684e-05	5.73377e-05	6.32572e-05	5.82671e-05	6.14423e-06	3.32339e-05	2.61566e-05	3.32362e-05
Arcobacter molluscorum	5.44897e-05	5.11e-05	3.53104e-05	7.01105e-05	4.69519e-05	5.38788e-05	3.95732e-05	4.15283e-05	4.62681e-05	7.26579e-05	4.9611e-05	5.04255e-05	2.10642e-05	2.86689e-05	2.56009e-05	2.12043e-05	5.44602e-06	1.24049e-05	7.37575e-06	1.33709e-05
Elusimicrobium minutum	5.44897e-05	6.08201e-05	8.94814e-05	6.40665e-05	9.373e-05	8.71125e-05	0.000100362	8.86468e-05	6.4806e-05	4.77956e-05	6.92025e-05	6.89728e-05	7.66142e-05	9.00593e-05	6.35281e-05	7.64422e-05	4.4406e-05	4.50834e-05	5.04692e-05	9.35961e-05
Microbacterium paludicola	5.44897e-05	4.36016e-05	3.95647e-05	5.81952e-05	5.91247e-05	4.28009e-05	3.37049e-05	4.39241e-05	5.68393e-05	5.59402e-05	5.22442e-05	5.50623e-05	5.79732e-05	8.18039e-05	4.30745e-05	7.9115e-05	1.4802e-05	3.0179e-05	2.76591e-05	2.81425e-05
Rhodobacter sphaeroides	5.44897e-05	7.30396e-05	5.91343e-05	6.64841e-05	7.96444e-05	7.62025e-05	7.64379e-05	7.93829e-05	8.38035e-05	7.43726e-05	7.29945e-05	9.31712e-05	8.23928e-05	6.87453e-05	8.93999e-05	7.46603e-05	5.79513e-06	3.23082e-05	2.65664e-05	3.64197e-05
Methylomonas sp. LW13	5.43111e-05	3.91581e-05	3.5594e-05	3.43645e-05	3.98222e-05	5.60608e-05	6.28958e-05	5.27089e-05	5.20899e-05	6.66567e-05	5.88801e-05	4.5354e-05	5.55499e-05	4.05267e-05	4.49709e-05	5.13179e-05	7.95957e-06	6.57273e-06	9.42457e-06	7.6405e-06
Formosa sp. Hel3_A1_48	5.41324e-05	4.30462e-05	4.0841e-05	2.38307e-05	2.52149e-05	2.70233e-05	3.5661e-05	3.05073e-05	2.14488e-05	1.80037e-05	1.75903e-05	2.73863e-05	5.77868e-06	1.09572e-05	8.26272e-06	5.70198e-06	6.35369e-06	4.53611e-06	5.39522e-06	8.65923e-06
Gallionella capsiferriformans	5.41324e-05	5.58212e-05	4.155e-05	4.43803e-05	5.26905e-05	4.44794e-05	5.04069e-05	5.30284e-05	5.48476e-05	6.88e-05	4.7715e-05	4.30355e-05	5.70412e-05	4.42791e-05	5.72972e-05	5.20306e-05	1.01938e-05	1.29603e-05	1.0927e-05	1.50263e-05
Pseudonocardia autotrophica	5.41324e-05	4.4157e-05	5.87089e-05	5.42234e-05	5.80813e-05	6.07606e-05	5.29649e-05	4.08894e-05	5.25495e-05	4.13657e-05	4.79257e-05	4.17314e-05	7.26996e-05	9.36617e-05	6.59663e-05	8.83807e-05	7.26136e-06	3.22156e-05	2.82737e-05	3.87118e-05
Streptomyces sp. CdTB01	5.41324e-05	3.88804e-05	4.2259e-05	4.95609e-05	3.73877e-05	4.21296e-05	4.13788e-05	4.79172e-05	3.67694e-05	3.51501e-05	4.8031e-05	3.6515e-05	4.95848e-05	5.0133e-05	5.32336e-05	5.04269e-05	2.23427e-06	2.04588e-05	1.87808e-05	1.68091e-05
Agarivorans gilvus	5.39537e-05	4.30462e-05	4.38189e-05	4.52437e-05	6.32982e-05	6.56281e-05	5.40182e-05	6.70841e-05	5.77585e-05	4.39377e-05	5.64575e-05	6.1293e-05	4.56702e-05	4.32285e-05	3.98236e-05	3.47465e-05	2.63923e-05	4.09175e-05	4.30252e-05	5.25921e-05
Lactobacillus oligofermentans	5.39537e-05	6.52635e-05	8.9765e-05	6.94198e-05	7.28625e-05	8.107e-05	7.82436e-05	7.45911e-05	6.29675e-05	5.87265e-05	5.49828e-05	6.89728e-05	8.89172e-05	7.80514e-05	9.08899e-05	7.23439e-05	3.51199e-05	4.15656e-05	6.24207e-05	8.36634e-05
Sphingomonas wittichii	5.39537e-05	5.58212e-05	4.96331e-05	7.54638e-05	8.62525e-05	6.32783e-05	6.83127e-05	6.45285e-05	7.20067e-05	7.03003e-05	6.97292e-05	8.01302e-05	5.89053e-05	5.83884e-05	5.30981e-05	6.18309e-05	7.68029e-06	5.30447e-05	2.91615e-05	3.20901e-05
Streptomyces reticuli	5.39537e-05	5.85983e-05	4.8215e-05	6.19943e-05	8.43396e-05	5.32074e-05	5.07078e-05	4.31255e-05	6.02098e-05	4.15801e-05	6.47786e-05	5.62215e-05	1.65904e-05	2.40158e-05	1.85573e-05	2.36989e-05	2.86265e-06	3.82329e-05	2.52005e-05	2.34309e-05
Winogradskyella sp. J14-2	5.39537e-05	5.24886e-05	3.57358e-05	3.97178e-05	3.26925e-05	4.21296e-05	4.21312e-05	4.4563e-05	4.2438e-05	2.67913e-05	3.68659e-05	4.6803e-05	7.82918e-06	1.09572e-05	9.61726e-06	1.0513e-05	5.0271e-06	1.58301e-05	1.22929e-05	1.71911e-05
Hippea maritima	5.37751e-05	7.35951e-05	4.7506e-05	4.50711e-05	7.0254e-05	6.37818e-05	6.75603e-05	6.56466e-05	5.82182e-05	6.38704e-05	5.18229e-05	5.56419e-05	4.67887e-05	4.75813e-05	5.54009e-05	4.16958e-05	3.43518e-05	3.57334e-05	3.4625e-05	4.86445e-05
Methylomicrobium alcaliphilum	5.37751e-05	4.83228e-05	4.31099e-05	4.24808e-05	5.42556e-05	4.85077e-05	5.62752e-05	5.23895e-05	4.64213e-05	4.6724e-05	3.84459e-05	4.63683e-05	5.72276e-05	4.78815e-05	7.39581e-05	5.1496e-05	2.44373e-06	2.17548e-05	1.27027e-05	1.5281e-05
Calothrix sp. NIES-2098	5.35964e-05	6.16532e-05	5.24693e-05	7.02832e-05	4.99082e-05	5.55573e-05	5.17611e-05	6.83619e-05	5.39284e-05	7.39439e-05	5.97227e-05	5.8395e-05	5.49907e-05	4.83318e-05	3.92818e-05	4.75759e-05	1.4802e-05	3.19379e-05	2.92298e-05	4.18954e-05
Cellulophaga baltica	5.35964e-05	4.63788e-05	6.32468e-05	4.43803e-05	3.19969e-05	5.1529e-05	5.68771e-05	6.38896e-05	6.0363e-05	3.15065e-05	3.49699e-05	6.15829e-05	2.23691e-05	1.89125e-05	2.47882e-05	2.03133e-05	4.24511e-05	2.62909e-05	3.25079e-05	3.04346e-05
Seonamhaeicola sp. S2-3	5.35964e-05	4.99891e-05	4.35353e-05	4.90428e-05	3.87788e-05	5.11933e-05	5.0106e-05	5.35076e-05	3.70758e-05	3.90081e-05	3.51806e-05	4.21661e-05	1.77089e-05	2.61172e-05	1.16491e-05	1.58586e-05	3.02324e-05	2.69389e-05	3.36689e-05	3.10714e-05
Streptomyces xinghaiensis	5.35964e-05	5.35994e-05	5.7858e-05	5.85406e-05	4.71258e-05	4.8172e-05	6.21434e-05	4.9195e-05	5.05579e-05	5.18679e-05	5.12963e-05	4.85418e-05	6.11422e-05	5.43358e-05	6.01418e-05	6.53946e-05	7.40101e-06	3.76775e-05	3.42153e-05	3.75658e-05
Capnocytophaga stomatis	5.34178e-05	4.83228e-05	3.06307e-05	2.0895e-05	3.98222e-05	5.50538e-05	4.3034e-05	6.05354e-05	2.03764e-05	1.30741e-05	1.20077e-05	2.3329e-05	2.60973e-06	2.25148e-06	2.98e-06	2.85099e-06	2.12255e-05	2.35137e-05	2.28102e-05	2.59777e-05
Frateuria aurantia	5.34178e-05	5.11e-05	3.61613e-05	4.40349e-05	4.69519e-05	4.02832e-05	4.89022e-05	5.68618e-05	6.20483e-05	7.45869e-05	5.45615e-05	6.07134e-05	6.00237e-05	5.4636e-05	5.12018e-05	6.8602e-05	6.56316e-06	1.58301e-05	1.41369e-05	1.36256e-05
Lawsonia intracellularis	5.34178e-05	5.66543e-05	5.57309e-05	4.88701e-05	4.64303e-05	4.96827e-05	4.76985e-05	6.26118e-05	5.2856e-05	5.05819e-05	4.79257e-05	6.41911e-05	5.51771e-05	5.19342e-05	5.94645e-05	5.27433e-05	6.21405e-06	2.518e-05	1.94638e-05	2.26668e-05
Lacinutrix sp. 5H-3-7-4	5.32391e-05	5.47103e-05	4.11246e-05	3.21196e-05	3.16491e-05	4.33045e-05	4.07769e-05	4.34449e-05	2.55853e-05	1.69321e-05	1.76956e-05	2.13004e-05	2.60973e-05	2.53667e-05	3.07481e-05	2.94009e-05	1.81534e-06	1.76816e-05	9.49286e-06	6.87645e-06
Listeria ivanovii	5.32391e-05	6.74853e-05	5.31783e-05	6.42392e-05	6.90367e-05	6.84815e-05	6.72594e-05	5.92576e-05	5.91374e-05	6.51564e-05	6.5516e-05	6.34666e-05	6.91578e-05	6.93457e-05	9.71208e-05	6.75329e-05	6.28387e-06	2.66612e-05	2.06931e-05	3.17081e-05
Massilia albidiflava	5.32391e-05	5.4988e-05	5.38874e-05	4.76613e-05	6.32982e-05	5.27039e-05	5.55228e-05	7.18758e-05	6.58784e-05	7.26579e-05	6.60426e-05	7.10014e-05	4.97712e-05	6.39421e-05	4.19909e-05	5.54162e-05	1.12412e-05	2.66612e-05	1.91223e-05	2.75058e-05
Propionibacterium freudenreichii	5.32391e-05	5.97092e-05	5.00585e-05	4.50711e-05	5.80813e-05	6.41175e-05	5.08583e-05	5.63826e-05	5.46944e-05	5.33682e-05	5.50882e-05	5.31786e-05	4.75343e-05	4.65306e-05	4.37518e-05	4.90014e-05	8.7276e-06	2.94384e-05	3.23713e-05	3.96032e-05
Xanthomonas oryzae	5.32391e-05	5.24886e-05	6.09778e-05	5.73318e-05	4.71258e-05	3.9444e-05	5.2363e-05	5.30284e-05	3.89142e-05	5.65832e-05	4.82416e-05	4.15865e-05	6.17014e-05	7.95524e-05	5.06599e-05	6.52164e-05	5.93477e-06	1.99959e-05	4.56887e-05	2.54683e-05
Mycobacterium sp. djl-10	5.30605e-05	5.94315e-05	5.36038e-05	4.54164e-05	4.86909e-05	4.14582e-05	5.77799e-05	5.57437e-05	4.94854e-05	5.85121e-05	6.18294e-05	5.60766e-05	6.71073e-05	7.2948e-05	6.63727e-05	9.03408e-05	5.09692e-06	1.55524e-05	2.12394e-05	2.26668e-05
Actinomyces howellii	5.28818e-05	6.9707e-05	6.86355e-05	6.42392e-05	6.55588e-05	5.20325e-05	6.56042e-05	5.97368e-05	5.89842e-05	7.84448e-05	6.65693e-05	5.88297e-05	5.89053e-05	5.85385e-05	6.13608e-05	5.59507e-05	6.63298e-06	2.03662e-05	1.5571e-05	2.17754e-05
Agromyces sp. LHK192	5.28818e-05	5.05445e-05	8.33836e-05	4.57618e-05	5.6864e-05	5.87464e-05	5.82313e-05	5.52645e-05	3.63097e-05	3.04349e-05	3.74979e-05	3.66599e-05	4.101e-05	4.68308e-05	4.36163e-05	4.11612e-05	3.34442e-05	4.2769e-05	4.82155e-05	5.99779e-05
Candidatus Protochlamydia naegleriophila	5.28818e-05	5.88761e-05	6.09778e-05	5.23239e-05	5.61684e-05	5.45502e-05	6.34977e-05	5.79798e-05	3.89142e-05	3.27925e-05	4.76097e-05	5.85399e-05	5.76004e-05	5.79381e-05	6.21736e-05	5.55943e-05	1.0124e-05	3.0827e-05	2.58151e-05	2.64871e-05
Hirschia baltica	5.28818e-05	5.44326e-05	7.10463e-05	6.80383e-05	5.21688e-05	4.75007e-05	5.35667e-05	4.64797e-05	6.69509e-05	7.22293e-05	5.95121e-05	5.27439e-05	6.95306e-05	6.40922e-05	5.94645e-05	7.28785e-05	8.86724e-06	8.97964e-06	1.08587e-05	1.69364e-05
Pediococcus pentosaceus	5.28818e-05	4.74896e-05	6.0127e-05	5.90586e-05	5.92986e-05	5.10254e-05	6.12406e-05	4.02505e-05	4.42764e-05	6.38704e-05	5.03483e-05	4.60785e-05	5.68548e-05	4.7131e-05	4.23972e-05	4.81105e-05	2.62526e-05	4.35096e-05	3.68787e-05	4.15134e-05
Zymobacter palmae	5.28818e-05	4.24907e-05	6.19705e-05	5.90586e-05	5.1821e-05	5.20325e-05	4.92032e-05	6.35702e-05	4.58085e-05	4.24374e-05	4.87683e-05	4.65132e-05	2.85206e-05	2.8819e-05	2.61427e-05	2.99354e-05	2.05273e-05	2.44394e-05	2.69761e-05	3.6547e-05
Lautropia mirabilis	5.27032e-05	4.2213e-05	3.75794e-05	3.66094e-05	4.62564e-05	4.85077e-05	5.50714e-05	5.41465e-05	4.397e-05	4.09371e-05	4.25538e-05	5.115e-05	8.16472e-05	8.85583e-05	9.48181e-05	8.53516e-05	3.17685e-05	1.77741e-05	1.41369e-05	2.21574e-05
Nocardiopsis alba	5.27032e-05	6.44304e-05	4.46698e-05	5.78498e-05	5.06038e-05	4.78363e-05	4.3034e-05	3.05073e-05	4.70341e-05	4.71526e-05	4.87683e-05	3.49211e-05	3.85867e-05	4.60803e-05	4.09072e-05	4.9536e-05	3.56086e-06	2.3884e-05	2.04199e-05	2.10114e-05
Vibrio nigripulchritudo	5.27032e-05	4.55456e-05	5.95597e-05	4.92155e-05	5.72118e-05	6.22712e-05	7.23753e-05	5.6702e-05	5.48476e-05	6.04411e-05	5.40349e-05	4.56438e-05	6.20742e-05	6.48427e-05	6.90817e-05	6.55728e-05	1.36151e-05	3.95289e-05	2.41078e-05	3.34908e-05
Chryseobacterium sp. 3008163	5.25245e-05	4.63788e-05	3.7863e-05	2.81478e-05	2.76495e-05	3.13874e-05	2.88899e-05	3.16254e-05	3.7229e-05	3.36498e-05	2.83341e-05	3.7964e-05	1.36079e-05	1.14075e-05	6.63727e-06	1.24731e-05	9.21635e-06	1.04608e-05	1.3932e-05	2.02473e-05
Vibrio tritonius	5.25245e-05	6.22087e-05	6.90609e-05	4.50711e-05	5.00821e-05	6.0257e-05	4.37863e-05	3.68963e-05	4.71873e-05	3.75078e-05	4.71883e-05	3.75293e-05	5.59227e-05	5.26847e-05	5.51299e-05	4.93578e-05	1.35452e-05	3.37894e-05	3.36006e-05	4.5461e-05
Lactobacillus koreensis	5.23459e-05	7.27619e-05	7.16135e-05	7.16647e-05	8.13834e-05	7.53632e-05	7.62875e-05	8.09801e-05	9.03913e-05	7.67302e-05	8.83728e-05	8.9114e-05	9.18997e-05	9.42621e-05	5.98708e-05	0.000102101	7.33118e-06	5.04526e-05	3.81763e-05	4.27868e-05
Methanolacinia petrolearia	5.23459e-05	7.1651e-05	6.3814e-05	5.37054e-05	8.3644e-05	8.69447e-05	6.66575e-05	6.00562e-05	7.4458e-05	6.10841e-05	6.16187e-05	5.66562e-05	6.91578e-05	6.49928e-05	7.21972e-05	6.34346e-05	6.42351e-06	2.74018e-05	1.94638e-05	2.40676e-05
Staphylococcus sciuri	5.23459e-05	5.88761e-05	6.04106e-05	5.88859e-05	4.86909e-05	5.35431e-05	4.96546e-05	5.33478e-05	5.48476e-05	5.65832e-05	4.62404e-05	4.95561e-05	4.99576e-05	5.28348e-05	5.12018e-05	5.50598e-05	5.86495e-06	1.73113e-05	1.66637e-05	1.91012e-05
Prauserella marina	5.21672e-05	7.47059e-05	5.99852e-05	6.71749e-05	6.38199e-05	6.6803e-05	6.15416e-05	5.01534e-05	5.33156e-05	4.20087e-05	5.59308e-05	6.07134e-05	6.35655e-05	7.88019e-05	6.20381e-05	7.00275e-05	2.65319e-05	4.2769e-05	4.04983e-05	4.34235e-05
Azoarcus sp. SY39	5.19885e-05	5.60989e-05	3.88556e-05	4.10993e-05	5.26905e-05	3.57514e-05	4.60433e-05	3.57782e-05	3.01815e-05	4.05084e-05	4.44497e-05	4.62234e-05	3.74682e-05	3.96261e-05	3.25091e-05	3.75975e-05	3.20478e-05	3.66592e-05	3.4147e-05	3.04346e-05
Mitsuaria sp. 7	5.19885e-05	6.83184e-05	6.53739e-05	5.83679e-05	6.92106e-05	6.12641e-05	6.30463e-05	4.71186e-05	4.88726e-05	6.70853e-05	6.362e-05	5.08602e-05	7.99695e-05	6.93457e-05	7.26036e-05	7.82241e-05	1.78741e-05	3.43448e-05	2.79322e-05	3.45096e-05
Pseudothermotoga hypogea	5.19885e-05	5.99869e-05	4.06992e-05	4.05812e-05	5.06038e-05	4.68293e-05	5.91341e-05	4.18477e-05	4.19784e-05	4.05084e-05	5.24549e-05	4.73826e-05	4.17556e-05	5.07334e-05	4.2939e-05	3.59938e-05	6.00459e-06	1.86999e-05	1.71418e-05	2.07567e-05
Saccharothrix espanaensis	5.19885e-05	7.52614e-05	6.40976e-05	6.23397e-05	8.22528e-05	7.48597e-05	8.69707e-05	6.948e-05	7.35387e-05	7.80162e-05	8.35276e-05	8.37527e-05	0.000121352	0.000110773	0.000132474	0.000123305	2.86964e-05	6.46164e-05	4.82155e-05	6.09966e-05
Dichelobacter nodosus	5.18099e-05	4.13799e-05	2.69437e-05	3.07381e-05	4.22567e-05	3.97797e-05	4.33349e-05	4.79172e-05	3.33988e-05	3.23639e-05	2.83341e-05	3.52109e-05	2.51652e-05	4.90823e-05	2.91227e-05	3.97357e-05	1.53606e-05	1.1294e-05	9.56116e-06	1.68091e-05
Polaribacter sp. BM10	5.18099e-05	4.61011e-05	3.24742e-05	3.16015e-05	2.19109e-05	4.11225e-05	3.74666e-05	3.7056e-05	3.32456e-05	1.92897e-05	2.46475e-05	3.53558e-05	3.26216e-05	3.10705e-05	4.05009e-05	2.9579e-05	1.18695e-05	1.6941e-05	1.37954e-05	1.22248e-05
Aureimonas sp. AU20	5.16312e-05	5.38771e-05	5.14766e-05	5.62956e-05	7.21669e-05	6.44532e-05	5.83817e-05	5.22298e-05	7.06278e-05	5.33682e-05	6.73066e-05	5.37582e-05	6.17014e-05	5.83884e-05	6.00063e-05	5.36343e-05	4.46853e-06	3.19379e-05	2.68395e-05	2.59777e-05
Dehalobacter sp. DCA	5.16312e-05	3.52701e-05	4.39608e-05	5.26692e-05	6.62544e-05	6.47889e-05	5.52219e-05	4.55214e-05	5.74521e-05	7.63015e-05	5.64575e-05	5.24541e-05	3.39265e-05	4.21778e-05	4.72736e-05	3.8132e-05	2.30409e-06	2.41617e-05	2.52005e-05	3.29815e-05
Frondihabitans sp. PAMC 28766	5.16312e-05	6.08201e-05	5.20439e-05	7.04559e-05	5.94725e-05	5.35431e-05	4.95041e-05	5.30284e-05	6.54188e-05	6.21557e-05	5.60362e-05	6.49156e-05	6.8785e-05	7.45991e-05	5.28272e-05	7.07402e-05	4.74781e-06	3.21231e-05	2.10345e-05	2.44496e-05
Maribacter sp. 1_2014MBL_MicDiv	5.16312e-05	4.4157e-05	3.31833e-05	2.48668e-05	1.89547e-05	2.75269e-05	2.8589e-05	2.53961e-05	1.6393e-05	1.84324e-05	1.83276e-05	1.88371e-05	1.09981e-05	1.05069e-05	1.95054e-05	1.03348e-05	4.53835e-06	1.41638e-05	1.28393e-05	1.38802e-05
Actinopolyspora erythraea	5.14526e-05	5.4988e-05	3.61613e-05	3.79909e-05	5.47773e-05	4.7165e-05	4.22816e-05	2.61947e-05	3.33988e-05	3.00062e-05	3.58126e-05	2.75312e-05	5.94645e-05	8.42054e-05	8.66908e-05	7.87586e-05	3.14194e-06	1.97182e-05	1.58442e-05	2.25395e-05
Alteromonas sp. RKMC-009	5.14526e-05	6.60967e-05	5.36038e-05	5.97494e-05	4.05178e-05	4.34723e-05	4.72471e-05	5.23895e-05	4.56553e-05	5.22966e-05	4.8031e-05	5.24541e-05	1.9573e-05	3.25714e-05	2.41109e-05	3.13609e-05	1.17299e-05	2.57355e-05	1.65954e-05	1.36256e-05
Helicobacter cholecystus	5.14526e-05	4.97114e-05	5.02003e-05	5.3878e-05	5.5299e-05	4.73328e-05	6.24444e-05	6.11743e-05	4.35104e-05	6.57994e-05	5.42455e-05	4.75275e-05	7.6987e-05	6.93457e-05	7.76154e-05	8.26788e-05	3.56086e-06	1.90702e-05	1.46149e-05	1.23521e-05
Streptomyces sp. WAC 01438	5.14526e-05	7.47059e-05	7.84203e-05	6.40665e-05	8.76436e-05	8.00629e-05	7.85445e-05	6.62855e-05	8.33439e-05	5.74405e-05	8.26849e-05	7.75219e-05	8.44433e-05	7.38486e-05	7.88345e-05	9.17663e-05	9.77491e-06	2.63835e-05	3.40787e-05	3.1326e-05
Virgibacillus dokdonensis	5.14526e-05	3.91581e-05	5.51637e-05	5.87133e-05	5.84291e-05	4.90113e-05	5.52219e-05	4.79172e-05	5.62265e-05	7.63015e-05	6.18294e-05	5.10051e-05	7.75462e-05	8.48058e-05	0.000111479	8.03623e-05	1.3266e-05	2.79572e-05	2.91615e-05	3.36182e-05
Brenneria goodwinii	5.12739e-05	4.33239e-05	6.40976e-05	6.5448e-05	5.51251e-05	4.31366e-05	5.40182e-05	3.7056e-05	3.44713e-05	4.3509e-05	4.45551e-05	3.5066e-05	6.74801e-05	7.64003e-05	8.27626e-05	7.92932e-05	1.25677e-05	3.21231e-05	3.16884e-05	3.79478e-05
Lactobacillus zymae	5.12739e-05	5.91538e-05	4.92077e-05	5.47415e-05	6.05158e-05	5.11933e-05	4.63443e-05	5.79798e-05	6.34271e-05	6.06554e-05	7.06772e-05	6.82483e-05	4.62295e-05	5.22344e-05	5.74327e-05	5.02487e-05	6.49334e-06	3.18453e-05	2.38346e-05	2.38129e-05
Leuconostoc mesenteroides	5.12739e-05	7.35951e-05	8.09729e-05	5.90586e-05	9.28605e-05	7.63703e-05	9.64502e-05	9.47164e-05	8.0433e-05	9.88062e-05	8.80568e-05	8.05649e-05	9.28317e-05	8.42054e-05	9.40054e-05	8.90935e-05	7.0519e-06	2.64761e-05	2.40395e-05	3.22174e-05
Breoghania sp. L-A4	5.10953e-05	5.99869e-05	3.70121e-05	5.88859e-05	6.22548e-05	5.74036e-05	6.48519e-05	5.6702e-05	6.81765e-05	4.50093e-05	5.41402e-05	8.73752e-05	3.57906e-05	4.50296e-05	4.00945e-05	3.17173e-05	3.42122e-06	3.73072e-05	2.09662e-05	2.0884e-05
Methanococcus vannielii	5.10953e-05	4.16576e-05	5.54473e-05	3.73002e-05	6.31243e-05	4.48151e-05	6.33472e-05	4.64797e-05	5.9597e-05	5.80835e-05	7.02559e-05	6.20176e-05	5.3313e-05	3.70744e-05	4.64609e-05	4.84669e-05	7.26136e-06	2.61983e-05	1.91906e-05	2.86519e-05
Polaribacter reichenbachii	5.10953e-05	4.94337e-05	4.35353e-05	2.72844e-05	5.04299e-05	6.39496e-05	6.60556e-05	6.97994e-05	2.0836e-05	3.60075e-05	2.15929e-05	2.81108e-05	2.59109e-05	2.70178e-05	3.15609e-05	1.92442e-05	2.63224e-05	3.22156e-05	3.1142e-05	2.92886e-05
Sulfurihydrogenibium azorense	5.10953e-05	2.80494e-05	4.2259e-05	2.21038e-05	3.65182e-05	3.97797e-05	4.24321e-05	3.89727e-05	2.81898e-05	4.2866e-05	3.57072e-05	3.30374e-05	3.72818e-05	2.11639e-05	2.89872e-05	2.74408e-05	1.45925e-05	1.86999e-05	2.19907e-05	3.08167e-05
Calothrix sp. NIES-3974	5.09166e-05	5.66543e-05	4.09828e-05	5.68137e-05	4.88648e-05	5.52216e-05	5.20621e-05	4.632e-05	5.53072e-05	5.52972e-05	6.204e-05	4.43397e-05	6.02102e-05	6.12403e-05	6.33927e-05	6.77111e-05	1.38245e-05	1.56449e-05	1.47515e-05	1.74458e-05
Campylobacter iguaniorum	5.09166e-05	5.66543e-05	6.59411e-05	7.21828e-05	5.1821e-05	6.07606e-05	6.84631e-05	6.22924e-05	6.54188e-05	7.52299e-05	6.83599e-05	7.02769e-05	8.23928e-05	7.57999e-05	8.18145e-05	8.07187e-05	7.88975e-06	2.93458e-05	1.85077e-05	2.54683e-05
Flexistipes sinusarabici	5.09166e-05	4.38793e-05	6.99118e-05	5.3878e-05	7.37319e-05	7.48597e-05	6.71089e-05	6.24521e-05	4.3204e-05	4.99389e-05	4.32911e-05	4.98459e-05	6.02102e-05	5.59869e-05	6.86754e-05	5.82671e-05	2.05273e-05	3.40671e-05	3.89276e-05	5.43749e-05
Siansivirga zeaxanthinifaciens	5.0738e-05	4.97114e-05	3.94229e-05	3.76456e-05	2.99101e-05	4.17939e-05	3.64134e-05	3.51393e-05	2.43597e-05	2.48623e-05	2.23302e-05	2.65169e-05	8.76123e-06	1.53101e-05	1.46291e-05	1.60368e-05	3.00928e-05	2.99939e-05	3.45567e-05	3.11987e-05
Sphingobacterium sp. B29	5.0738e-05	4.77674e-05	5.30365e-05	4.99063e-05	5.40817e-05	7.80488e-05	7.41809e-05	8.76885e-05	3.8761e-05	2.87202e-05	3.44433e-05	4.56438e-05	2.31147e-05	1.30586e-05	2.88518e-05	1.72841e-05	8.79742e-06	2.86053e-05	2.1376e-05	2.0502e-05
Candidatus Thioglobus singularis	5.05593e-05	5.47103e-05	5.55891e-05	5.47415e-05	5.73857e-05	5.72358e-05	5.76294e-05	4.40838e-05	5.45412e-05	2.93632e-05	4.20271e-05	5.24541e-05	3.26216e-05	3.06202e-05	2.96645e-05	3.22518e-05	1.63381e-05	3.12899e-05	2.40395e-05	2.91612e-05
Leifsonia xyli	5.05593e-05	6.30418e-05	5.20439e-05	4.92155e-05	4.74736e-05	5.55573e-05	4.45386e-05	3.65768e-05	4.13655e-05	4.17944e-05	3.83405e-05	3.04292e-05	5.55499e-05	6.43924e-05	6.19027e-05	4.88232e-05	6.7028e-06	3.453e-05	1.9737e-05	1.99926e-05
Leptolyngbya sp. PCC 7376	5.05593e-05	5.02668e-05	4.0841e-05	3.8509e-05	7.73838e-05	8.27485e-05	8.11025e-05	3.83338e-05	4.74938e-05	4.43663e-05	3.70766e-05	3.44864e-05	4.25013e-05	6.63437e-05	5.37754e-05	5.98708e-05	9.35599e-06	2.49023e-05	1.83028e-05	2.38129e-05
Sulfurihydrogenibium sp. YO3AOP1	5.05593e-05	3.66587e-05	4.02737e-05	2.24492e-05	3.46053e-05	3.81012e-05	3.22002e-05	3.11462e-05	2.22148e-05	2.31477e-05	1.99076e-05	1.79677e-05	1.6404e-05	1.41093e-05	1.74736e-05	1.31858e-05	1.50115e-05	1.24974e-05	1.98735e-05	2.58503e-05
Vibrio coralliilyticus	5.05593e-05	6.22087e-05	6.43812e-05	7.20101e-05	4.99082e-05	5.01862e-05	5.22125e-05	5.71812e-05	6.404e-05	4.37234e-05	5.15069e-05	5.21643e-05	5.21946e-05	6.09401e-05	5.37754e-05	5.27433e-05	5.3762e-06	2.08291e-05	2.08297e-05	3.0562e-05
Alcaligenes faecalis	5.03807e-05	6.30418e-05	6.50903e-05	4.93882e-05	6.29504e-05	5.00184e-05	4.37863e-05	5.82993e-05	5.91374e-05	6.4299e-05	6.09867e-05	6.20176e-05	7.00898e-05	5.07334e-05	6.94881e-05	9.72901e-05	1.25677e-05	3.46225e-05	3.08689e-05	3.28541e-05
Frankia symbiont of Datisca glomerata	5.03807e-05	4.58233e-05	2.97799e-05	3.73002e-05	5.28644e-05	3.27301e-05	4.92032e-05	4.00907e-05	4.01399e-05	4.30804e-05	5.08749e-05	5.02806e-05	3.61634e-05	3.24213e-05	3.16963e-05	3.58156e-05	4.18925e-06	2.07365e-05	1.70052e-05	2.10114e-05
Pimelobacter simplex	5.03807e-05	6.24864e-05	7.28898e-05	7.61545e-05	8.3644e-05	9.11408e-05	7.67389e-05	5.89382e-05	5.99034e-05	7.43726e-05	6.09867e-05	5.96991e-05	8.05287e-05	8.27044e-05	9.33281e-05	8.7668e-05	1.26376e-05	2.89755e-05	3.38738e-05	3.5783e-05
Spiroplasma helicoides	5.03807e-05	4.61011e-05	3.94229e-05	5.336e-05	6.43415e-05	6.32783e-05	5.9736e-05	6.74035e-05	6.58784e-05	6.21557e-05	5.68788e-05	7.78117e-05	6.30063e-05	5.85385e-05	6.2309e-05	5.64853e-05	9.28617e-06	2.18474e-05	2.30151e-05	3.04346e-05
Lactobacillus mucosae	5.0202e-05	6.52635e-05	7.60096e-05	7.99536e-05	8.10356e-05	9.29871e-05	8.39614e-05	7.65078e-05	7.21599e-05	9.96635e-05	8.51075e-05	6.79585e-05	9.46958e-05	7.41488e-05	7.03008e-05	8.58861e-05	1.81534e-05	6.72085e-05	4.82838e-05	5.90865e-05
Nitratifractor salsuginis	5.0202e-05	5.13777e-05	4.96331e-05	4.23081e-05	3.82571e-05	4.56543e-05	5.25135e-05	4.7438e-05	4.16719e-05	3.15065e-05	3.12833e-05	4.76724e-05	4.9212e-05	4.11271e-05	4.83572e-05	4.77541e-05	1.84327e-05	3.60111e-05	3.32592e-05	4.25321e-05
Trichodesmium erythraeum	5.0202e-05	5.91538e-05	3.70121e-05	4.88701e-05	8.034e-05	6.6803e-05	7.08706e-05	4.98339e-05	5.59201e-05	6.15128e-05	5.91961e-05	6.67993e-05	4.69751e-05	5.86886e-05	4.86281e-05	5.07833e-05	4.81764e-06	2.80498e-05	1.441e-05	1.92286e-05
Actinomyces sp. 299	5.00233e-05	3.38815e-05	3.41759e-05	3.35011e-05	3.6866e-05	3.89405e-05	4.42377e-05	3.86532e-05	4.15187e-05	3.15065e-05	4.42391e-05	4.88316e-05	3.74682e-05	3.70744e-05	3.54891e-05	2.85099e-05	4.04961e-06	1.93479e-05	1.85077e-05	2.27941e-05
Bosea sp. AS-1	4.98447e-05	5.63766e-05	5.13348e-05	4.69706e-05	4.41696e-05	5.70679e-05	5.77799e-05	5.59034e-05	4.50425e-05	3.27925e-05	4.65564e-05	4.73826e-05	2.74021e-05	3.10705e-05	1.77445e-05	2.86881e-05	3.14194e-06	3.18453e-05	2.41078e-05	2.67417e-05
Chryseobacterium jeonii	4.98447e-05	4.47125e-05	4.79314e-05	3.78182e-05	4.76475e-05	5.10254e-05	3.73162e-05	4.18477e-05	2.74238e-05	3.00062e-05	3.2442e-05	3.14435e-05	2.81478e-05	2.7318e-05	3.84691e-05	2.90445e-05	4.39871e-06	1.67558e-05	1.22929e-05	9.04125e-06
Corynebacterium matruchotii	4.98447e-05	5.52657e-05	3.07725e-05	3.86817e-05	4.69519e-05	3.92762e-05	3.88208e-05	4.48825e-05	3.52373e-05	4.4795e-05	5.04536e-05	4.49193e-05	2.59109e-05	2.34154e-05	1.74736e-05	2.77972e-05	3.14194e-06	1.30529e-05	1.38637e-05	1.38802e-05
Photobacterium gaetbulicola	4.98447e-05	5.38771e-05	6.3814e-05	4.00632e-05	4.81692e-05	4.19617e-05	6.18425e-05	4.34449e-05	4.28976e-05	6.25844e-05	5.75108e-05	4.56438e-05	6.59888e-05	5.44859e-05	5.51299e-05	6.71765e-05	7.68029e-06	1.80519e-05	1.441e-05	2.66144e-05
Sedimentisphaera cyanobacteriorum	4.98447e-05	6.13755e-05	6.15451e-05	6.13035e-05	5.98203e-05	5.89142e-05	7.11715e-05	6.67647e-05	5.30092e-05	6.00124e-05	6.02494e-05	5.75256e-05	5.72276e-05	5.10336e-05	6.50181e-05	5.30997e-05	3.97979e-05	3.61037e-05	4.40496e-05	5.38655e-05
Deinococcus sp. S14-83	4.9666e-05	4.38793e-05	5.43128e-05	3.67821e-05	4.76475e-05	3.25623e-05	4.06265e-05	3.91324e-05	3.78418e-05	4.69383e-05	4.75043e-05	4.24559e-05	7.40044e-05	9.08098e-05	6.06836e-05	9.42609e-05	4.88746e-06	2.518e-05	1.60491e-05	2.16481e-05
Nocardia seriolae	4.9666e-05	5.77652e-05	6.56575e-05	3.79909e-05	6.79934e-05	5.72358e-05	5.70275e-05	4.69589e-05	5.82182e-05	7.18006e-05	6.25667e-05	6.44809e-05	8.63074e-05	4.78815e-05	7.47708e-05	9.55082e-05	8.93706e-06	3.91587e-05	2.98445e-05	3.36182e-05
Pseudonocardia dioxanivorans	4.9666e-05	5.6932e-05	6.55157e-05	5.12878e-05	7.84271e-05	6.5796e-05	7.01183e-05	6.93202e-05	7.81349e-05	7.43726e-05	5.98281e-05	7.49137e-05	8.33249e-05	8.0453e-05	6.81336e-05	7.59077e-05	9.91455e-06	2.71241e-05	2.80688e-05	3.25995e-05
Rhodobiaceae bacterium	4.9666e-05	4.44348e-05	5.53055e-05	5.18058e-05	3.70399e-05	3.20587e-05	3.02441e-05	3.48198e-05	3.69226e-05	3.04349e-05	5.06643e-05	3.81089e-05	5.20081e-05	3.66241e-05	4.94409e-05	4.82887e-05	3.7005e-06	2.62909e-05	2.05565e-05	1.94833e-05
Sinomonas atrocyanea	4.9666e-05	5.02668e-05	3.80048e-05	4.00632e-05	4.24306e-05	4.98505e-05	3.92723e-05	3.86532e-05	4.10591e-05	4.88673e-05	5.57202e-05	3.52109e-05	3.48585e-05	3.57235e-05	4.13136e-05	3.72411e-05	1.19394e-05	2.64761e-05	2.73176e-05	3.82025e-05
Streptococcus mitis	4.9666e-05	4.97114e-05	4.14082e-05	5.11151e-05	4.41696e-05	4.36402e-05	4.7548e-05	4.48825e-05	4.61149e-05	5.63688e-05	4.45551e-05	3.99926e-05	5.14489e-05	5.49362e-05	5.0389e-05	5.77326e-05	2.60432e-05	4.39725e-05	4.21374e-05	3.37455e-05
Streptomyces griseochromogenes	4.9666e-05	6.91516e-05	3.72957e-05	4.86975e-05	5.46034e-05	4.73328e-05	4.79994e-05	4.64797e-05	5.54604e-05	3.06492e-05	5.61415e-05	6.23074e-05	5.62956e-05	6.31916e-05	5.98708e-05	4.61504e-05	5.3762e-06	3.60111e-05	2.77956e-05	2.92886e-05
Streptomyces nigra	4.9666e-05	5.16554e-05	5.47382e-05	5.47415e-05	3.19969e-05	4.88434e-05	4.10779e-05	4.90353e-05	5.00983e-05	3.17209e-05	3.96045e-05	4.07171e-05	3.05711e-05	2.40158e-05	2.70909e-05	3.34992e-05	4.67799e-06	1.83296e-05	1.07222e-05	1.46443e-05
Streptomyces sp. endophyte_N2	4.9666e-05	4.13799e-05	4.70806e-05	2.86659e-05	4.76475e-05	3.57514e-05	3.70152e-05	4.53616e-05	4.30508e-05	3.00062e-05	3.64446e-05	4.92663e-05	2.79614e-05	3.43726e-05	2.61427e-05	1.94224e-05	4.88746e-06	2.08291e-05	1.73467e-05	1.40076e-05
Sulfuricella denitrificans	4.9666e-05	4.33239e-05	4.2259e-05	6.73476e-05	6.66022e-05	4.88434e-05	5.67266e-05	6.29313e-05	6.29675e-05	5.93695e-05	4.8979e-05	6.2887e-05	6.61752e-05	8.15037e-05	5.55363e-05	7.1453e-05	1.18695e-05	4.89715e-05	2.602e-05	2.91612e-05
Sulfurospirillum multivorans	4.9666e-05	6.63744e-05	3.87138e-05	7.54638e-05	4.53869e-05	3.75977e-05	3.91218e-05	5.01534e-05	5.22431e-05	5.97981e-05	5.25602e-05	5.115e-05	5.18217e-05	5.3135e-05	5.14727e-05	5.39907e-05	2.65319e-06	1.17569e-05	1.14051e-05	8.2772e-06
Azoarcus communis	4.94874e-05	4.4157e-05	4.76478e-05	5.21512e-05	4.69519e-05	4.8172e-05	5.10088e-05	5.46256e-05	6.26611e-05	6.9443e-05	5.43509e-05	5.36133e-05	3.89595e-05	3.15208e-05	4.05009e-05	3.5281e-05	1.71061e-05	2.83275e-05	2.58151e-05	2.86519e-05
Enterococcus sp. FDAARGOS_375	4.94874e-05	6.85962e-05	3.81466e-05	6.09582e-05	7.87749e-05	6.5796e-05	6.30463e-05	8.01815e-05	8.36503e-05	9.0876e-05	8.00516e-05	8.41874e-05	5.89053e-05	7.41488e-05	6.2309e-05	5.5238e-05	2.16445e-06	3.06419e-05	1.37954e-05	1.74458e-05
Helicobacter himalayensis	4.94874e-05	6.19309e-05	6.96282e-05	4.31715e-05	6.83412e-05	6.73066e-05	8.12529e-05	7.55495e-05	6.61848e-05	5.07962e-05	5.17176e-05	7.37545e-05	4.75343e-05	4.66807e-05	4.84927e-05	4.15176e-05	1.11015e-05	1.74964e-05	1.78247e-05	2.91612e-05
Lactococcus garvieae	4.94874e-05	6.9707e-05	5.79998e-05	7.59819e-05	7.77315e-05	8.30842e-05	8.39614e-05	7.60286e-05	8.28843e-05	9.64486e-05	8.62662e-05	7.57831e-05	8.40705e-05	7.61001e-05	8.43881e-05	6.23654e-05	1.6757e-05	3.00864e-05	3.26445e-05	4.48242e-05
Thermosipho melanesiensis	4.94874e-05	6.05424e-05	5.94179e-05	6.64841e-05	5.56467e-05	6.22712e-05	6.56042e-05	6.56466e-05	6.4806e-05	4.17944e-05	6.08814e-05	5.73807e-05	4.0078e-05	4.23279e-05	5.83808e-05	3.27864e-05	1.09619e-05	2.17548e-05	2.10345e-05	3.34908e-05
Vampirococcus sp. LiM	4.94874e-05	6.08201e-05	6.73592e-05	5.76771e-05	8.31223e-05	7.38526e-05	7.6137e-05	7.8744e-05	8.16586e-05	7.73732e-05	8.75302e-05	7.07116e-05	7.81054e-05	6.85952e-05	8.87226e-05	8.01841e-05	1.44529e-05	3.48077e-05	3.47616e-05	4.87718e-05
Austwickia chelonae	4.93087e-05	7.19288e-05	7.35988e-05	6.47573e-05	8.41657e-05	8.45948e-05	6.56042e-05	6.72438e-05	7.81349e-05	4.71526e-05	6.65693e-05	6.73789e-05	4.08236e-05	3.78249e-05	5.95999e-05	4.6685e-05	6.42351e-06	2.80498e-05	2.22638e-05	2.5723e-05
Caldicellulosiruptor owensensis	4.93087e-05	4.88782e-05	4.62297e-05	5.07697e-05	4.48652e-05	5.45502e-05	5.462e-05	4.99936e-05	4.74938e-05	4.02941e-05	4.37124e-05	4.30355e-05	5.29402e-05	5.44859e-05	4.23972e-05	5.18524e-05	4.53835e-06	1.74964e-05	1.24295e-05	1.68091e-05
Flavobacterium arcticum	4.93087e-05	4.94337e-05	3.34669e-05	3.09108e-05	3.53009e-05	4.63257e-05	4.19807e-05	4.00907e-05	4.55021e-05	2.80773e-05	2.97034e-05	3.7964e-05	7.26996e-06	6.30415e-06	5.41818e-06	8.37479e-06	1.39642e-06	5.46184e-06	4.43911e-06	4.71164e-06
Marichromatium purpuratum	4.93087e-05	4.13799e-05	5.89925e-05	3.54006e-05	4.60825e-05	5.38788e-05	5.29649e-05	4.90353e-05	4.13655e-05	5.46542e-05	5.60362e-05	4.39049e-05	6.09558e-05	5.95892e-05	6.98945e-05	6.87802e-05	9.42581e-06	2.53652e-05	2.39029e-05	2.66144e-05
Thermosipho africanus	4.93087e-05	6.24864e-05	6.70756e-05	4.62799e-05	5.54728e-05	5.32074e-05	7.07201e-05	4.77575e-05	4.78002e-05	6.06554e-05	4.63457e-05	4.04273e-05	5.6482e-05	6.31916e-05	4.60545e-05	6.62856e-05	1.20092e-05	2.24028e-05	2.28102e-05	3.06893e-05
Cellvibrio sp. PSBB006	4.91301e-05	3.69364e-05	4.01319e-05	4.99063e-05	4.03439e-05	4.02832e-05	3.49087e-05	4.632e-05	3.47777e-05	4.20087e-05	3.47593e-05	3.10088e-05	4.84664e-05	4.33786e-05	3.33218e-05	3.79538e-05	1.34056e-05	1.46266e-05	1.3932e-05	1.84645e-05
Desulfurobacterium thermolithotrophum	4.91301e-05	6.49858e-05	5.26111e-05	3.12562e-05	5.72118e-05	5.33753e-05	5.64256e-05	4.96742e-05	3.63097e-05	3.60075e-05	3.57072e-05	4.17314e-05	3.33672e-05	4.15774e-05	3.29154e-05	3.43901e-05	1.557e-05	2.54578e-05	2.41761e-05	3.64197e-05
Methanosaeta harundinacea	4.91301e-05	4.69342e-05	5.09094e-05	6.00947e-05	4.59086e-05	3.91083e-05	5.08583e-05	4.15283e-05	4.59617e-05	4.801e-05	5.36135e-05	4.24559e-05	7.36316e-05	8.42054e-05	8.87226e-05	8.07187e-05	4.18925e-06	1.47192e-05	1.40003e-05	1.59177e-05
Actinoplanes missouriensis	4.89514e-05	5.97092e-05	6.79265e-05	5.85406e-05	6.8689e-05	5.55573e-05	6.39491e-05	5.0952e-05	5.22431e-05	6.02268e-05	6.4568e-05	5.30337e-05	8.63074e-05	8.28545e-05	6.65081e-05	8.30351e-05	1.95498e-05	3.50854e-05	3.91324e-05	5.76857e-05
Aeromicrobium erythreum	4.89514e-05	3.80473e-05	5.02003e-05	2.33126e-05	3.21708e-05	3.99475e-05	3.17488e-05	3.76949e-05	3.64629e-05	3.66505e-05	3.38113e-05	3.23129e-05	6.85986e-05	6.31916e-05	8.20854e-05	6.59292e-05	4.32889e-06	2.29583e-05	1.60491e-05	1.65544e-05
Colwellia sp. PAMC 20917	4.89514e-05	4.86005e-05	5.43128e-05	3.07381e-05	3.58226e-05	5.30396e-05	4.67957e-05	3.83338e-05	3.04879e-05	2.5291e-05	3.29686e-05	3.83987e-05	4.11964e-05	3.45227e-05	4.48354e-05	3.88448e-05	1.21488e-05	1.12014e-05	1.50247e-05	2.44496e-05
Kitasatospora aureofaciens	4.89514e-05	3.8325e-05	4.92077e-05	4.54164e-05	7.30364e-05	6.8985e-05	5.86827e-05	6.26118e-05	5.31624e-05	6.4942e-05	6.19347e-05	5.6946e-05	6.50568e-05	9.21607e-05	8.72326e-05	0.000104239	5.65549e-06	3.74923e-05	3.33957e-05	2.83972e-05
Aggregatibacter aphrophilus	4.87728e-05	3.49924e-05	3.81466e-05	3.5746e-05	5.00821e-05	4.95148e-05	4.73975e-05	3.92921e-05	4.19784e-05	3.92224e-05	4.17111e-05	3.69497e-05	2.49788e-05	5.71876e-05	2.35691e-05	3.01136e-05	1.66174e-05	1.15717e-05	1.86443e-05	2.89065e-05
Aquabacterium olei	4.87728e-05	2.33282e-05	2.86454e-05	2.6421e-05	3.86049e-05	3.18909e-05	2.6332e-05	2.53961e-05	2.71174e-05	3.27925e-05	3.60232e-05	2.17351e-05	3.63498e-05	4.98328e-05	3.18318e-05	4.08048e-05	2.12255e-05	1.59227e-05	1.2088e-05	1.73185e-05
Campylobacter avium	4.87728e-05	4.16576e-05	3.5594e-05	2.21038e-05	4.59086e-05	3.64228e-05	3.49087e-05	4.00907e-05	4.02931e-05	5.65832e-05	3.09673e-05	4.41948e-05	2.68429e-05	2.7318e-05	2.60072e-05	2.24516e-05	4.11943e-06	1.23123e-05	8.26357e-06	1.20975e-05
Dermabacter vaginalis	4.87728e-05	5.83206e-05	2.63765e-05	2.79751e-05	4.74736e-05	4.21296e-05	2.87395e-05	3.41809e-05	3.95271e-05	4.3509e-05	3.93938e-05	3.18782e-05	3.46721e-05	4.30784e-05	3.07481e-05	3.15391e-05	2.79283e-06	1.00905e-05	1.30441e-05	1.69364e-05
Muriicola sp. MMS17-SY002	4.87728e-05	5.13777e-05	7.50169e-05	3.91997e-05	3.07796e-05	6.96564e-05	5.88331e-05	6.35702e-05	3.17136e-05	2.05757e-05	2.88607e-05	3.60803e-05	3.00119e-05	3.9476e-05	3.07481e-05	3.20737e-05	4.37776e-05	3.35117e-05	5.29278e-05	8.03526e-05
Mycobacterium kansasii	4.87728e-05	4.13799e-05	2.43911e-05	2.91839e-05	2.31282e-05	1.96381e-05	1.79057e-05	1.77294e-05	1.99167e-05	2.29333e-05	2.11716e-05	2.31841e-05	1.67768e-05	1.80119e-05	2.16727e-05	1.3364e-05	2.30409e-06	1.52747e-05	1.40003e-05	1.50263e-05
Staphylococcus xylosus	4.87728e-05	4.77674e-05	5.58727e-05	1.98589e-05	2.43455e-05	3.39051e-05	3.62629e-05	2.45975e-05	2.40533e-05	2.93632e-05	1.72743e-05	1.56493e-05	1.80817e-05	1.93627e-05	1.92345e-05	1.92442e-05	7.19154e-06	1.44415e-05	1.54344e-05	2.82698e-05
Weissella cibaria	4.87728e-05	7.08179e-05	6.6792e-05	6.8211e-05	7.47753e-05	6.86494e-05	6.28958e-05	6.61258e-05	6.72573e-05	7.35152e-05	7.23625e-05	6.52054e-05	6.5616e-05	6.5293e-05	6.81336e-05	6.77111e-05	1.02637e-05	3.22156e-05	2.41761e-05	2.89065e-05
Agromyces aureus	4.85941e-05	4.38793e-05	4.56625e-05	4.33442e-05	4.72997e-05	4.07868e-05	4.58929e-05	3.84935e-05	3.84546e-05	5.65832e-05	3.78139e-05	4.9701e-05	6.0583e-05	5.82383e-05	7.20617e-05	5.73762e-05	3.96582e-05	3.26785e-05	3.74251e-05	4.49516e-05
Bacillus amyloliquefaciens	4.85941e-05	3.69364e-05	4.38189e-05	2.84932e-05	7.23408e-05	5.87464e-05	6.62061e-05	7.02786e-05	7.89009e-05	5.95838e-05	8.1105e-05	7.5928e-05	5.94645e-05	5.14839e-05	5.32336e-05	6.52164e-05	7.54065e-06	1.36083e-05	2.09662e-05	2.11387e-05
Dictyoglomus turgidum	4.85941e-05	6.24864e-05	4.02737e-05	5.62956e-05	5.16471e-05	6.36139e-05	6.27453e-05	3.54587e-05	3.61565e-05	5.65832e-05	4.24484e-05	4.47744e-05	6.48704e-05	6.73944e-05	5.7839e-05	6.64637e-05	7.0519e-06	1.18494e-05	1.12002e-05	1.36256e-05
Helicobacter hepaticus	4.85941e-05	4.69342e-05	5.62981e-05	4.7316e-05	4.20829e-05	4.85077e-05	5.10088e-05	4.87158e-05	4.68809e-05	3.70791e-05	4.03418e-05	4.27457e-05	2.88934e-05	3.18209e-05	2.51945e-05	2.65499e-05	1.52209e-05	2.03662e-05	1.96004e-05	2.76331e-05
Indioceanicola profundi	4.85941e-05	5.44326e-05	5.16184e-05	3.8509e-05	6.13853e-05	5.70679e-05	6.15416e-05	5.90979e-05	5.39284e-05	5.18679e-05	5.56148e-05	5.43378e-05	3.35536e-05	4.11271e-05	4.21263e-05	5.25652e-05	6.56316e-06	2.22177e-05	2.68395e-05	2.39402e-05
Streptomyces peucetius	4.85941e-05	5.19331e-05	6.39558e-05	4.35169e-05	4.3474e-05	4.8172e-05	5.50714e-05	5.35076e-05	5.16303e-05	5.16536e-05	4.88736e-05	6.27421e-05	4.43654e-05	3.81251e-05	4.82218e-05	5.70198e-05	5.23656e-06	1.65707e-05	1.85077e-05	1.73185e-05
Synechococcus sp. PCC 6312	4.85941e-05	4.05467e-05	7.61514e-05	4.43803e-05	4.76475e-05	5.48859e-05	6.1692e-05	5.71812e-05	4.58085e-05	7.03003e-05	5.50882e-05	5.59317e-05	7.45637e-05	6.57433e-05	6.40699e-05	8.1966e-05	1.98989e-05	3.24933e-05	3.61958e-05	4.55883e-05
Tessaracoccus sp. Marseille-P5995	4.85941e-05	5.55434e-05	5.92761e-05	5.83679e-05	5.26905e-05	5.22004e-05	4.86013e-05	6.34104e-05	5.62265e-05	4.99389e-05	5.20336e-05	4.62234e-05	7.58685e-05	7.27979e-05	7.82926e-05	7.60858e-05	1.63381e-05	5.24893e-05	4.54155e-05	4.57156e-05
Aeromonas veronii	4.84154e-05	5.77652e-05	4.19754e-05	4.05812e-05	4.6778e-05	3.57514e-05	4.87518e-05	4.56811e-05	4.90258e-05	3.30068e-05	5.48775e-05	5.79603e-05	5.48043e-05	4.53298e-05	6.75917e-05	5.8089e-05	1.07524e-05	1.28677e-05	1.12002e-05	2.012e-05
Geobacillus thermodenitrificans	4.84154e-05	3.97136e-05	4.01319e-05	3.40192e-05	5.26905e-05	5.25361e-05	4.7548e-05	4.20074e-05	4.56553e-05	4.26517e-05	4.85576e-05	4.72377e-05	3.42993e-05	2.98697e-05	3.54891e-05	3.17173e-05	2.58337e-06	1.77741e-05	1.52296e-05	1.42623e-05
Muricauda lutaonensis	4.84154e-05	5.24886e-05	2.62346e-05	2.53848e-05	3.80832e-05	4.33045e-05	4.40872e-05	4.50422e-05	2.98751e-05	2.2076e-05	2.84394e-05	2.72414e-05	2.4606e-05	3.78249e-05	2.66845e-05	3.11827e-05	1.75948e-05	2.24028e-05	2.42444e-05	3.14534e-05
Nitratireductor basaltis	4.84154e-05	6.05424e-05	5.38874e-05	5.95767e-05	2.92145e-05	3.81012e-05	4.00246e-05	5.54242e-05	5.23963e-05	8.29458e-05	6.04601e-05	6.18727e-05	5.68548e-05	3.10705e-05	3.80627e-05	5.57725e-05	5.0271e-06	1.259e-05	1.46149e-05	1.77005e-05
Parvibaculum lavamentivorans	4.84154e-05	3.8325e-05	2.8929e-05	2.74571e-05	3.77354e-05	3.67585e-05	3.91218e-05	2.68336e-05	3.30924e-05	3.68648e-05	3.57072e-05	3.76742e-05	4.58566e-05	3.67742e-05	2.60072e-05	4.43686e-05	5.51584e-06	1.71261e-05	1.96687e-05	2.19028e-05
Silvanigrellales bacterium RF1110005	4.84154e-05	5.55434e-05	5.45964e-05	4.92155e-05	5.96464e-05	5.85785e-05	6.50023e-05	5.54242e-05	4.48893e-05	4.58667e-05	4.18165e-05	6.39013e-05	5.07033e-05	4.65306e-05	4.57836e-05	5.55943e-05	1.22186e-05	3.83255e-05	2.71127e-05	3.69291e-05
Azorhizobium caulinodans	4.82368e-05	4.91559e-05	3.8572e-05	4.47257e-05	6.15592e-05	5.55573e-05	4.18302e-05	4.55214e-05	4.71873e-05	6.72997e-05	5.04536e-05	5.14398e-05	5.53635e-05	7.18973e-05	3.98236e-05	5.61289e-05	4.60817e-06	2.22177e-05	2.0215e-05	1.98653e-05
Paracoccus denitrificans	4.82368e-05	5.22108e-05	4.70806e-05	3.45372e-05	4.55608e-05	3.55835e-05	3.05451e-05	3.08267e-05	4.45828e-05	3.90081e-05	4.24484e-05	4.28906e-05	4.95848e-05	3.52732e-05	4.26681e-05	4.40122e-05	2.65319e-06	2.08291e-05	1.75515e-05	1.98653e-05
Tessaracoccus flavus	4.82368e-05	4.13799e-05	5.09094e-05	4.09266e-05	4.27784e-05	3.54157e-05	4.61938e-05	3.9931e-05	3.92206e-05	4.88673e-05	4.8663e-05	4.56438e-05	5.42451e-05	6.12403e-05	4.4429e-05	6.12963e-05	7.0519e-06	2.40691e-05	1.70052e-05	2.30488e-05
Chelativorans sp. BNC1	4.80581e-05	5.24886e-05	5.23275e-05	5.07697e-05	6.53849e-05	6.14319e-05	6.12406e-05	5.35076e-05	3.95271e-05	4.26517e-05	4.50817e-05	4.65132e-05	6.07694e-05	5.05833e-05	8.24917e-05	6.02272e-05	2.21332e-05	2.69389e-05	2.43127e-05	3.5401e-05
Cyanobium gracile	4.80581e-05	4.55456e-05	4.18336e-05	4.90428e-05	4.45174e-05	4.44794e-05	3.92723e-05	4.61602e-05	5.00983e-05	4.75813e-05	4.56084e-05	5.68011e-05	3.05711e-05	2.89691e-05	3.79272e-05	2.26297e-05	6.91226e-06	2.36989e-05	1.80979e-05	1.75731e-05
Prosthecochloris sp. HL-130-GSB	4.80581e-05	4.0269e-05	3.43178e-05	2.52122e-05	4.53869e-05	4.43116e-05	4.63443e-05	5.14311e-05	3.3552e-05	6.32274e-05	4.46604e-05	3.89783e-05	4.60431e-05	4.93825e-05	4.40227e-05	4.34776e-05	2.33201e-05	2.73092e-05	3.30543e-05	3.76931e-05
Variovorax sp. PMC12	4.80581e-05	3.27706e-05	4.11246e-05	2.90113e-05	2.69539e-05	3.10517e-05	2.93413e-05	3.62574e-05	3.41649e-05	3.30068e-05	3.74979e-05	3.56456e-05	3.65362e-05	3.69243e-05	3.576e-05	3.97357e-05	4.53835e-06	7.68361e-06	7.78551e-06	1.14607e-05
Dechloromonas sp. HYN0024	4.78795e-05	4.2213e-05	3.16234e-05	2.29672e-05	3.75616e-05	3.37372e-05	3.15984e-05	3.19448e-05	3.53905e-05	4.37234e-05	3.69712e-05	3.60803e-05	5.3313e-05	2.98697e-05	5.60781e-05	4.47249e-05	1.50813e-05	1.27752e-05	1.12685e-05	1.64271e-05
Rubrobacter indicoceani	4.78795e-05	5.83206e-05	5.64399e-05	6.30304e-05	7.3558e-05	7.50275e-05	5.83817e-05	6.24521e-05	6.49592e-05	6.19414e-05	6.4568e-05	5.73807e-05	4.88392e-05	4.2478e-05	4.45645e-05	4.79323e-05	9.77491e-06	1.65707e-05	2.38346e-05	2.69964e-05
Streptomyces fungicidicus	4.78795e-05	4.36016e-05	5.19021e-05	4.93882e-05	6.5211e-05	3.64228e-05	4.99555e-05	5.97368e-05	6.58784e-05	6.85857e-05	7.84717e-05	7.10014e-05	6.24471e-05	4.47294e-05	6.21736e-05	6.11181e-05	4.32889e-06	3.85106e-05	2.71127e-05	2.81425e-05
Clostridium ljungdahlii	4.77008e-05	3.80473e-05	4.94913e-05	6.80383e-05	5.65162e-05	4.64936e-05	4.90527e-05	3.94518e-05	5.54604e-05	5.46542e-05	5.23496e-05	6.7234e-05	6.72937e-05	6.10902e-05	6.96236e-05	4.77541e-05	3.56086e-06	3.44374e-05	2.39029e-05	2.99253e-05
Corynebacterium diphtheriae	4.77008e-05	6.05424e-05	5.7858e-05	7.66726e-05	5.59945e-05	6.21033e-05	6.18425e-05	5.73409e-05	4.74938e-05	4.07227e-05	4.72937e-05	5.37582e-05	6.00237e-05	5.98894e-05	7.20617e-05	6.53946e-05	3.17685e-05	6.20243e-05	4.52789e-05	4.48242e-05
Dehalogenimonas formicexedens	4.77008e-05	5.4988e-05	5.68654e-05	5.85406e-05	7.89488e-05	6.54603e-05	6.74098e-05	5.89382e-05	5.79117e-05	4.37234e-05	6.204e-05	6.89728e-05	5.25674e-05	4.74312e-05	4.33454e-05	5.57725e-05	5.0271e-06	2.11994e-05	2.15126e-05	2.62324e-05
Dyella thiooxydans	4.77008e-05	4.2213e-05	3.87138e-05	2.98747e-05	4.27784e-05	3.89405e-05	3.41563e-05	3.96116e-05	3.52373e-05	4.6724e-05	3.181e-05	3.66599e-05	4.04508e-05	3.25714e-05	3.37281e-05	3.3321e-05	2.00386e-05	2.34211e-05	2.43809e-05	3.03073e-05
Pantoea ananatis	4.77008e-05	3.86027e-05	2.93544e-05	3.88544e-05	4.57347e-05	3.60871e-05	4.19807e-05	2.97087e-05	3.75354e-05	3.66505e-05	3.58126e-05	3.18782e-05	2.38604e-05	2.65675e-05	1.85573e-05	1.49677e-05	1.94102e-05	3.31414e-05	3.52397e-05	3.43822e-05
Streptomyces atratus	4.77008e-05	4.83228e-05	3.03471e-05	3.54006e-05	3.28664e-05	2.18201e-05	4.19807e-05	3.32226e-05	3.43181e-05	2.48623e-05	3.22313e-05	3.37619e-05	4.04508e-05	5.91389e-05	4.45645e-05	5.29215e-05	2.93247e-06	1.91627e-05	1.58442e-05	1.68091e-05
Bordetella sp. J329	4.75222e-05	4.19353e-05	3.51686e-05	4.28261e-05	5.25166e-05	4.73328e-05	3.03946e-05	3.22643e-05	4.2438e-05	3.98654e-05	4.00258e-05	3.56456e-05	4.54838e-05	3.82752e-05	4.00945e-05	4.82887e-05	2.84171e-05	3.46225e-05	1.91223e-05	2.33035e-05
Haemophilus influenzae	4.75222e-05	3.55478e-05	4.18336e-05	3.91997e-05	3.06057e-05	2.7359e-05	4.01751e-05	3.72157e-05	3.66162e-05	4.39377e-05	4.31858e-05	3.63701e-05	4.26877e-05	3.36221e-05	5.82454e-05	3.3321e-05	3.90997e-06	1.28677e-05	1.05173e-05	1.45169e-05
Lactobacillus allii	4.75222e-05	6.60967e-05	5.75744e-05	6.63114e-05	8.83392e-05	8.30842e-05	7.58361e-05	7.55495e-05	7.13938e-05	9.04473e-05	7.49958e-05	7.28851e-05	8.38841e-05	8.22541e-05	5.94645e-05	8.69553e-05	1.1311e-05	3.60111e-05	2.57468e-05	3.78205e-05
Corynebacterium provencense	4.73435e-05	3.69364e-05	3.54522e-05	3.03927e-05	3.93005e-05	4.69971e-05	4.19807e-05	3.56185e-05	3.90674e-05	4.4795e-05	3.32846e-05	4.33253e-05	3.37401e-05	2.94194e-05	2.85809e-05	3.54592e-05	4.25907e-06	1.37935e-05	1.2771e-05	2.17754e-05
Halomonas huangheensis	4.73435e-05	5.08223e-05	5.51637e-05	6.92471e-05	6.5211e-05	5.95856e-05	5.64256e-05	6.03757e-05	6.29675e-05	5.87265e-05	6.94132e-05	6.52054e-05	5.38722e-05	6.12403e-05	5.83808e-05	5.84453e-05	4.67799e-06	3.453e-05	2.8342e-05	2.89065e-05
Methanosphaerula palustris	4.73435e-05	6.80407e-05	4.58043e-05	5.97494e-05	6.92106e-05	6.96564e-05	7.20744e-05	7.28342e-05	7.09342e-05	9.92349e-05	7.72077e-05	7.63627e-05	5.61091e-05	5.56867e-05	5.74327e-05	5.95145e-05	9.00688e-06	2.74944e-05	1.83028e-05	2.31762e-05
Methylomonas denitrificans	4.73435e-05	5.72097e-05	5.82835e-05	6.68295e-05	4.57347e-05	5.53895e-05	6.15416e-05	5.28687e-05	6.26611e-05	5.31539e-05	3.97098e-05	6.88279e-05	4.06372e-05	5.20843e-05	4.25327e-05	4.65068e-05	6.91226e-06	1.87924e-05	1.63223e-05	1.17154e-05
Steroidobacter denitrificans	4.73435e-05	3.55478e-05	4.84986e-05	4.74887e-05	4.57347e-05	3.87726e-05	4.36358e-05	3.05073e-05	2.74238e-05	4.00797e-05	3.25473e-05	3.27476e-05	6.78529e-05	7.33983e-05	8.00536e-05	7.21657e-05	1.37547e-05	3.43448e-05	2.86152e-05	2.81425e-05
Streptomyces sp. P3	4.73435e-05	5.35994e-05	5.75744e-05	5.68137e-05	7.32102e-05	6.93207e-05	4.54415e-05	3.75352e-05	5.00983e-05	7.52299e-05	5.02429e-05	5.01357e-05	5.12625e-05	5.10336e-05	4.94409e-05	5.4347e-05	2.55544e-05	3.23082e-05	3.65373e-05	3.60377e-05
Streptomyces xiamenensis	4.73435e-05	6.80407e-05	5.53055e-05	5.26692e-05	6.90367e-05	5.84107e-05	5.53724e-05	8.14593e-05	8.16586e-05	6.45134e-05	6.53053e-05	9.08528e-05	5.42451e-05	6.25912e-05	6.35281e-05	5.50598e-05	4.32889e-06	2.36063e-05	2.33565e-05	2.41949e-05
Sulfurivermis fontis	4.73435e-05	4.94337e-05	3.20488e-05	4.21354e-05	5.87769e-05	5.0354e-05	5.32658e-05	3.72157e-05	4.90258e-05	4.7367e-05	3.86565e-05	4.60785e-05	3.22488e-05	3.46728e-05	3.08836e-05	3.047e-05	9.63527e-06	2.43469e-05	1.96004e-05	2.50863e-05
Agrobacterium vitis	4.71649e-05	6.3875e-05	5.38874e-05	7.13193e-05	7.96444e-05	8.74482e-05	7.50837e-05	9.04038e-05	0.000101269	0.000101807	9.89059e-05	9.33161e-05	5.83461e-05	5.4636e-05	5.59427e-05	6.04054e-05	5.51584e-06	2.86053e-05	2.7181e-05	3.71837e-05
Chlorobium phaeovibrioides	4.71649e-05	3.41592e-05	3.1907e-05	4.26535e-05	3.54748e-05	2.40021e-05	2.93413e-05	3.25837e-05	2.94155e-05	3.57931e-05	3.03354e-05	2.91251e-05	1.30486e-05	1.80119e-05	1.30036e-05	1.85314e-05	2.79283e-06	7.96133e-06	8.40016e-06	9.55062e-06
Enterobacter cloacae	4.71649e-05	4.63788e-05	6.28213e-05	6.16489e-05	5.72118e-05	4.95148e-05	5.02564e-05	5.46256e-05	6.00566e-05	5.95838e-05	5.77214e-05	7.17259e-05	3.65362e-05	3.70744e-05	2.384e-05	4.49031e-05	2.35296e-05	3.70295e-05	3.08006e-05	2.71238e-05
Fervidobacterium islandicum	4.71649e-05	3.91581e-05	3.17652e-05	4.1272e-05	5.63423e-05	4.8172e-05	5.34163e-05	3.60976e-05	4.27444e-05	4.02941e-05	4.62404e-05	3.62252e-05	2.31147e-05	2.83687e-05	1.788e-05	3.17173e-05	5.23656e-06	2.24028e-05	1.6254e-05	2.69964e-05
Nocardia terpenica	4.71649e-05	4.38793e-05	5.64399e-05	4.23081e-05	4.48652e-05	4.599e-05	4.90527e-05	4.32852e-05	4.05995e-05	4.7367e-05	4.6135e-05	4.34702e-05	5.01441e-05	5.14839e-05	5.83808e-05	5.38125e-05	3.97979e-06	3.5826e-05	3.2303e-05	3.24721e-05
Rhodanobacter denitrificans	4.71649e-05	5.3044e-05	4.86404e-05	5.19785e-05	6.17331e-05	5.10254e-05	7.23753e-05	6.21327e-05	7.30791e-05	0.000113166	5.78268e-05	5.85399e-05	4.62295e-05	5.3135e-05	4.19909e-05	4.43686e-05	5.3762e-06	1.85147e-05	1.59808e-05	1.83372e-05
Rhodococcus ruber	4.71649e-05	4.88782e-05	3.98483e-05	4.86975e-05	4.24306e-05	3.74298e-05	3.70152e-05	4.69589e-05	6.09759e-05	3.06492e-05	5.08749e-05	5.07153e-05	1.7336e-05	2.47663e-05	1.86927e-05	2.20952e-05	2.44373e-06	1.01831e-05	8.46845e-06	8.78657e-06
Sulfuritortus calidifontis	4.71649e-05	4.61011e-05	2.05623e-05	1.95135e-05	2.78234e-05	2.2995e-05	2.61815e-05	2.23614e-05	1.96103e-05	1.77894e-05	2.41208e-05	2.40535e-05	3.5977e-05	4.80316e-05	4.11781e-05	5.04269e-05	2.54846e-05	1.18494e-05	1.10636e-05	1.93559e-05
Thioalkalivibrio paradoxus	4.71649e-05	5.33217e-05	4.5237e-05	2.62483e-05	3.59965e-05	3.42408e-05	3.05451e-05	3.59379e-05	3.00283e-05	4.6081e-05	3.41273e-05	3.55007e-05	3.35536e-05	1.62107e-05	2.49236e-05	2.9579e-05	1.86422e-05	1.61078e-05	1.63223e-05	2.15207e-05
Vibrio natriegens	4.71649e-05	4.36016e-05	4.99167e-05	3.83363e-05	5.21688e-05	6.42853e-05	4.64947e-05	5.59034e-05	5.57669e-05	4.02941e-05	4.6451e-05	5.79603e-05	3.48585e-05	3.76748e-05	3.73854e-05	4.18739e-05	1.4034e-05	3.21231e-05	2.91615e-05	3.36182e-05
Bacillus sonorensis	4.69862e-05	4.58233e-05	4.38189e-05	5.42234e-05	5.47773e-05	4.599e-05	5.50714e-05	6.06951e-05	4.82598e-05	6.7514e-05	5.36135e-05	6.53503e-05	8.03423e-05	7.35484e-05	8.08663e-05	6.16527e-05	5.16674e-06	1.66633e-05	1.23612e-05	2.29215e-05
Cyanothece sp. PCC 7822	4.69862e-05	5.35994e-05	3.65867e-05	4.4553e-05	6.13853e-05	5.16968e-05	5.91341e-05	4.88756e-05	5.00983e-05	7.58729e-05	5.79321e-05	4.69479e-05	8.07152e-05	8.06031e-05	8.4659e-05	7.59077e-05	1.07524e-05	3.66592e-05	2.21272e-05	2.69964e-05
Gemmatimonas aurantiaca	4.69862e-05	6.7763e-05	3.94229e-05	4.4553e-05	6.90367e-05	5.52216e-05	5.41686e-05	6.29313e-05	5.66861e-05	5.25109e-05	5.54042e-05	6.20176e-05	4.32469e-05	5.08835e-05	3.79272e-05	4.08048e-05	3.00229e-06	1.56449e-05	1.00392e-05	1.70638e-05
Gordonia phthalatica	4.69862e-05	4.0269e-05	4.90659e-05	3.02201e-05	3.53009e-05	3.37372e-05	4.95041e-05	3.76949e-05	3.60033e-05	3.81508e-05	3.32846e-05	3.7964e-05	3.56041e-05	2.23647e-05	2.57363e-05	2.69062e-05	5.93477e-06	2.4532e-05	1.441e-05	1.87192e-05
Shinella sp. HZN7	4.69862e-05	3.74918e-05	4.55207e-05	3.02201e-05	3.63443e-05	3.82691e-05	4.499e-05	3.67365e-05	4.3204e-05	5.01533e-05	4.01312e-05	4.20212e-05	3.97051e-05	3.30217e-05	3.874e-05	3.51028e-05	2.73698e-05	2.66612e-05	2.91615e-05	3.5401e-05
Thalassospira marina	4.69862e-05	5.4988e-05	6.3814e-05	6.5448e-05	5.19949e-05	7.13349e-05	5.56733e-05	6.19729e-05	6.86361e-05	5.50829e-05	5.70895e-05	5.07153e-05	5.59227e-05	4.89322e-05	5.51299e-05	5.04269e-05	1.22186e-05	1.98108e-05	2.39029e-05	3.28541e-05
Verminephrobacter eiseniae	4.69862e-05	3.41592e-05	4.0841e-05	4.10993e-05	4.27784e-05	4.9347e-05	4.5291e-05	5.97368e-05	4.79534e-05	4.77956e-05	5.16122e-05	4.56438e-05	3.76546e-05	4.17275e-05	3.94172e-05	4.6685e-05	1.53606e-05	1.86073e-05	1.84394e-05	2.35582e-05
Verrucosispora maris	4.69862e-05	6.80407e-05	4.62297e-05	5.76771e-05	8.19051e-05	7.35169e-05	6.54538e-05	5.22298e-05	6.58784e-05	5.22966e-05	5.98281e-05	6.59299e-05	5.94645e-05	6.5293e-05	7.23327e-05	6.46819e-05	5.72531e-06	3.5826e-05	2.39029e-05	3.14534e-05
Anoxybacillus gonensis	4.68076e-05	4.08244e-05	3.68703e-05	3.79909e-05	3.53009e-05	3.2898e-05	3.53601e-05	3.35421e-05	2.74238e-05	4.30804e-05	3.43379e-05	2.52127e-05	5.81596e-05	4.8632e-05	5.26918e-05	6.05836e-05	4.67799e-06	1.93479e-05	2.59517e-05	2.16481e-05
Macrococcus canis	4.68076e-05	6.16532e-05	6.53739e-05	7.18374e-05	7.37319e-05	7.75452e-05	7.8394e-05	7.37925e-05	6.94022e-05	5.55115e-05	6.05654e-05	8.01302e-05	5.46179e-05	3.67742e-05	5.13372e-05	5.00705e-05	1.47322e-05	2.90681e-05	3.14835e-05	4.30415e-05
Tenacibaculum maritimum	4.68076e-05	3.30483e-05	2.35403e-05	1.91682e-05	2.03458e-05	3.62549e-05	3.09965e-05	3.59379e-05	2.61982e-05	1.9504e-05	2.34888e-05	2.88353e-05	1.2303e-05	1.29085e-05	1.96409e-05	1.08694e-05	1.74552e-06	1.01831e-05	6.62451e-06	7.38581e-06
Wenzhouxiangella marina	4.68076e-05	5.05445e-05	5.95597e-05	5.02516e-05	4.60825e-05	4.69971e-05	4.58929e-05	3.64171e-05	2.71174e-05	3.36498e-05	3.10727e-05	3.46313e-05	4.71615e-05	5.98894e-05	4.51063e-05	5.73762e-05	9.00688e-06	2.27731e-05	2.28785e-05	2.55957e-05
Xanthomonas campestris	4.68076e-05	4.30462e-05	4.87823e-05	4.24808e-05	4.36479e-05	5.05219e-05	4.5291e-05	4.79172e-05	6.05162e-05	4.3509e-05	4.85576e-05	4.89765e-05	2.90798e-05	3.75247e-05	2.81745e-05	2.79754e-05	6.98208e-06	2.07365e-05	1.52978e-05	2.17754e-05
Nocardia asteroides	4.66289e-05	4.86005e-05	4.14082e-05	4.55891e-05	5.54728e-05	4.1626e-05	4.58929e-05	4.00907e-05	5.71457e-05	5.50829e-05	4.8347e-05	4.54989e-05	4.62295e-05	4.57801e-05	3.79272e-05	4.54377e-05	3.56086e-06	1.37935e-05	1.63223e-05	1.92286e-05
Stenotrophomonas acidaminiphila	4.66289e-05	4.91559e-05	4.43862e-05	2.95293e-05	3.63443e-05	4.76685e-05	5.53724e-05	5.25492e-05	5.08643e-05	3.53645e-05	3.09673e-05	5.01357e-05	1.7336e-05	1.96629e-05	3.69791e-05	2.29861e-05	3.07212e-06	1.64781e-05	1.13368e-05	1.70638e-05
Rubrivivax gelatinosus	4.64502e-05	6.19309e-05	7.14717e-05	5.64683e-05	5.92986e-05	6.5796e-05	7.1322e-05	8.24176e-05	7.26195e-05	7.0729e-05	5.52988e-05	8.25935e-05	6.85986e-05	5.79381e-05	6.78627e-05	7.35912e-05	2.95342e-05	4.42502e-05	3.71519e-05	4.50789e-05
Rummeliibacillus stabekisii	4.64502e-05	5.60989e-05	7.91294e-05	6.47573e-05	7.61665e-05	7.62025e-05	8.20053e-05	6.27716e-05	6.44996e-05	4.56523e-05	5.63521e-05	5.12949e-05	0.000102711	0.000109122	9.86108e-05	0.000111189	1.86422e-05	3.93438e-05	5.33376e-05	6.26521e-05
Thiolapillus brandeum	4.64502e-05	3.6381e-05	4.02737e-05	3.71275e-05	4.017e-05	4.39759e-05	4.76985e-05	4.632e-05	4.44296e-05	4.75813e-05	4.18165e-05	4.14416e-05	3.56041e-05	3.7975e-05	4.72736e-05	4.02703e-05	1.79439e-05	2.194e-05	1.75515e-05	1.91012e-05
Asaia bogorensis	4.62716e-05	4.4157e-05	4.89241e-05	4.69706e-05	3.61704e-05	4.63257e-05	4.5291e-05	5.11117e-05	4.21316e-05	4.09371e-05	3.64446e-05	4.40499e-05	1.71496e-05	1.87624e-05	1.66609e-05	2.01351e-05	2.58337e-06	1.3886e-05	8.94651e-06	9.42328e-06
Geobacillus thermoleovorans	4.62716e-05	7.05402e-05	4.06992e-05	7.82268e-05	8.99043e-05	7.16706e-05	8.59175e-05	5.97368e-05	7.61432e-05	4.65096e-05	7.8261e-05	7.33198e-05	0.000100475	0.000134188	0.000143582	6.78892e-05	3.3514e-06	3.35117e-05	2.92981e-05	3.27268e-05
Nocardia cyriacigeorgica	4.62716e-05	6.19309e-05	4.70806e-05	6.51026e-05	7.00801e-05	5.65644e-05	5.95855e-05	5.35076e-05	5.85246e-05	7.52299e-05	5.64575e-05	5.6946e-05	5.53635e-05	6.04898e-05	5.97354e-05	5.70198e-05	5.09692e-06	3.27711e-05	2.67712e-05	2.63597e-05
Paracoccus yeei	4.62716e-05	5.47103e-05	3.92811e-05	5.49142e-05	4.03439e-05	4.46473e-05	4.0476e-05	2.4917e-05	3.90674e-05	4.2866e-05	4.09738e-05	3.55007e-05	3.95187e-05	3.69243e-05	4.07718e-05	4.61504e-05	3.49104e-06	2.53652e-05	1.82345e-05	2.24121e-05
Photobacterium damselae	4.62716e-05	6.30418e-05	5.47382e-05	5.9404e-05	6.93845e-05	6.88172e-05	5.40182e-05	5.75007e-05	6.14355e-05	3.90081e-05	5.56148e-05	7.52035e-05	3.98916e-05	5.28348e-05	3.65727e-05	4.9536e-05	3.22572e-05	4.87863e-05	4.65082e-05	4.46969e-05
Paraburkholderia phymatum	4.60929e-05	5.16554e-05	4.32517e-05	3.74729e-05	2.99101e-05	2.92053e-05	3.18993e-05	3.78546e-05	1.50142e-05	2.76486e-05	2.53848e-05	1.53595e-05	3.20624e-05	2.50665e-05	3.33218e-05	3.22518e-05	4.18925e-06	2.18474e-05	1.42734e-05	1.34982e-05
Cyanothece sp. PCC 7424	4.59143e-05	3.61032e-05	4.50952e-05	3.19469e-05	4.86909e-05	4.75007e-05	5.0106e-05	4.37644e-05	5.11707e-05	3.45072e-05	4.18165e-05	5.92644e-05	3.22488e-05	3.9476e-05	2.60072e-05	3.51028e-05	4.60817e-06	2.75869e-05	2.02833e-05	1.84645e-05
Flavobacteriaceae bacterium 3519-10	4.59143e-05	4.36016e-05	3.53104e-05	3.38465e-05	3.28664e-05	4.17939e-05	4.25826e-05	5.89382e-05	3.67694e-05	2.03614e-05	3.43379e-05	3.73844e-05	3.2808e-05	2.68677e-05	2.89872e-05	3.27864e-05	1.95498e-06	1.1942e-05	9.56116e-06	9.8053e-06
Herbaspirillum rubrisubalbicans	4.59143e-05	6.08201e-05	5.07676e-05	4.86975e-05	3.40836e-05	4.01154e-05	3.53601e-05	3.91324e-05	3.33988e-05	4.11514e-05	3.2126e-05	3.41966e-05	5.14489e-05	6.079e-05	5.24209e-05	5.18524e-05	6.56316e-06	1.6293e-05	1.2771e-05	1.84645e-05
Lactobacillus casei	4.59143e-05	7.33173e-05	6.42394e-05	7.01105e-05	5.23427e-05	6.04249e-05	6.95164e-05	6.34104e-05	4.67277e-05	6.77283e-05	5.17176e-05	5.30337e-05	8.57482e-05	9.02094e-05	6.81336e-05	9.26572e-05	1.02637e-05	1.81444e-05	1.68686e-05	2.5723e-05
Mariprofundus ferrinatatus	4.59143e-05	5.33217e-05	3.92811e-05	3.38465e-05	3.87788e-05	4.90113e-05	5.34163e-05	6.37299e-05	2.92623e-05	3.25782e-05	3.29686e-05	3.33272e-05	2.29283e-05	2.29651e-05	3.35927e-05	2.17388e-05	5.86495e-06	2.17548e-05	1.29076e-05	1.65544e-05
Myxococcus stipitatus	4.59143e-05	4.4157e-05	3.47432e-05	4.97336e-05	7.54709e-05	5.0354e-05	6.425e-05	5.03131e-05	5.77585e-05	6.15128e-05	5.29815e-05	5.68011e-05	4.73479e-05	5.25346e-05	4.10427e-05	4.47249e-05	5.16674e-06	5.10081e-05	3.44885e-05	3.92212e-05
Sedimentisphaera salicampi	4.59143e-05	4.61011e-05	5.30365e-05	2.9702e-05	3.91266e-05	4.11225e-05	4.9805e-05	4.08894e-05	3.73822e-05	4.2866e-05	3.58126e-05	3.15884e-05	4.21285e-05	3.97762e-05	3.96881e-05	4.41904e-05	1.38943e-05	1.86999e-05	1.9054e-05	2.73784e-05
Lactobacillales bacterium	4.57356e-05	5.94315e-05	3.87138e-05	5.6641e-05	6.50371e-05	4.14582e-05	6.30463e-05	6.26118e-05	6.54188e-05	4.801e-05	6.89919e-05	7.0132e-05	3.84003e-05	5.64372e-05	6.77272e-05	4.27649e-05	2.72301e-06	1.13866e-05	1.14734e-05	1.31162e-05
Lactobacillus curieae	4.57356e-05	5.16554e-05	4.80732e-05	5.76771e-05	5.40817e-05	6.12641e-05	5.17611e-05	5.12714e-05	4.88726e-05	5.52972e-05	5.21389e-05	3.72395e-05	7.58685e-05	0.000104319	6.81336e-05	8.73116e-05	1.15903e-05	2.09216e-05	2.52005e-05	3.38729e-05
Rhodovulum sp. P5	4.57356e-05	4.94337e-05	4.25427e-05	4.81794e-05	5.30383e-05	4.96827e-05	4.90527e-05	4.52019e-05	4.68809e-05	5.35825e-05	4.41337e-05	4.98459e-05	3.05711e-05	2.05635e-05	2.27563e-05	3.15391e-05	4.46853e-06	8.7945e-06	9.69774e-06	1.15881e-05
Gordonia sp. YC-JH1	4.5557e-05	3.1382e-05	5.36038e-05	3.73002e-05	4.22567e-05	3.84369e-05	3.55105e-05	3.65768e-05	4.35104e-05	4.77956e-05	3.65499e-05	3.95579e-05	3.00119e-05	3.3472e-05	2.19436e-05	3.9023e-05	5.30638e-06	9.90538e-06	6.89769e-06	1.13334e-05
Halorubrum sp. BOL3-1	4.5557e-05	5.22108e-05	3.5594e-05	4.31715e-05	4.10395e-05	3.59192e-05	3.74666e-05	5.86187e-05	5.82182e-05	5.74405e-05	5.08749e-05	5.2599e-05	1.36079e-05	1.24582e-05	1.74736e-05	1.47895e-05	2.51355e-06	2.86978e-06	4.98546e-06	6.36708e-06
Oceanithermus profundus	4.5557e-05	5.05445e-05	5.87089e-05	5.68137e-05	7.87749e-05	6.61316e-05	7.65884e-05	7.93829e-05	6.98618e-05	7.84448e-05	7.22571e-05	7.37545e-05	4.62295e-05	6.079e-05	4.86281e-05	4.75759e-05	1.41038e-05	3.89735e-05	3.12786e-05	3.60377e-05
Paraburkholderia caribensis	4.5557e-05	4.47125e-05	3.23324e-05	3.97178e-05	3.42575e-05	3.22266e-05	3.26516e-05	2.50767e-05	3.07943e-05	3.96511e-05	3.47593e-05	3.30374e-05	6.24471e-05	6.24411e-05	7.05717e-05	7.09184e-05	3.28158e-06	2.86978e-05	2.45858e-05	2.0884e-05
Streptomyces brunneus	4.5557e-05	3.88804e-05	4.93495e-05	3.55733e-05	3.30403e-05	3.60871e-05	4.60433e-05	4.23269e-05	4.397e-05	4.3509e-05	4.00258e-05	5.36133e-05	5.85325e-05	4.54799e-05	6.21736e-05	6.82456e-05	7.75011e-06	1.9533e-05	1.96004e-05	2.45769e-05
Betaproteobacteria bacterium GR16-43	4.53783e-05	4.13799e-05	5.3462e-05	3.9027e-05	2.64322e-05	4.8172e-05	2.93413e-05	4.50422e-05	2.8343e-05	4.52237e-05	4.60297e-05	3.30374e-05	4.52974e-05	4.00764e-05	4.79509e-05	5.39907e-05	4.37078e-05	2.97161e-05	2.92981e-05	4.22774e-05
Methylobacterium nodulans	4.53783e-05	5.02668e-05	4.94913e-05	4.66252e-05	6.1907e-05	6.31104e-05	6.71089e-05	6.16535e-05	6.25079e-05	6.30131e-05	6.34093e-05	6.33217e-05	4.88392e-05	4.83318e-05	5.41818e-05	5.79108e-05	7.40101e-06	2.77721e-05	2.26053e-05	2.19028e-05
Simiduia agarivorans	4.53783e-05	4.91559e-05	5.06258e-05	3.45372e-05	5.0256e-05	5.3711e-05	4.37863e-05	4.53616e-05	4.27444e-05	5.37969e-05	4.39231e-05	3.68048e-05	4.97712e-05	4.87821e-05	5.95999e-05	5.45252e-05	9.98438e-06	1.54598e-05	1.76198e-05	2.35582e-05
Winogradskyella sp. PG-2	4.53783e-05	4.55456e-05	3.03471e-05	2.55575e-05	2.52149e-05	4.48151e-05	4.64947e-05	4.96742e-05	3.63097e-05	1.39315e-05	1.8117e-05	3.49211e-05	1.88273e-05	2.16142e-05	2.03182e-05	1.92442e-05	2.93247e-06	1.20346e-05	7.03428e-06	8.40455e-06
Caldicellulosiruptor saccharolyticus	4.51997e-05	4.16576e-05	6.50903e-05	5.14604e-05	5.61684e-05	5.94178e-05	6.36481e-05	4.99936e-05	5.62265e-05	6.45134e-05	5.30869e-05	4.95561e-05	9.0222e-05	8.75076e-05	9.46826e-05	9.74683e-05	1.07524e-05	2.41617e-05	2.17175e-05	2.97979e-05
Capnocytophaga cynodegmi	4.51997e-05	4.72119e-05	4.80732e-05	3.98905e-05	2.3476e-05	4.599e-05	4.96546e-05	4.87158e-05	3.56969e-05	1.07165e-05	1.64317e-05	4.01375e-05	1.2303e-05	1.14075e-05	1.24618e-05	1.37204e-05	1.38245e-05	8.97964e-06	8.94651e-06	7.51315e-06
Immundisolibacter cernigliae	4.51997e-05	4.13799e-05	4.66551e-05	4.59345e-05	4.62564e-05	4.96827e-05	3.55105e-05	4.42436e-05	4.21316e-05	3.40785e-05	2.90714e-05	3.34721e-05	2.4606e-05	3.3472e-05	3.65727e-05	3.27864e-05	7.19154e-06	2.37914e-05	1.50247e-05	1.4899e-05
Weissella soli	4.51997e-05	6.55413e-05	5.62981e-05	5.47415e-05	5.96464e-05	4.54865e-05	6.33472e-05	4.72783e-05	5.17835e-05	4.4795e-05	4.6451e-05	6.27421e-05	7.54957e-05	6.91956e-05	7.80217e-05	8.30351e-05	1.22885e-05	2.16622e-05	2.92298e-05	3.74384e-05
Dehalogenimonas lykanthroporepellens	4.5021e-05	5.6932e-05	4.02737e-05	4.43803e-05	5.61684e-05	5.11933e-05	6.07892e-05	4.44033e-05	3.23264e-05	2.87202e-05	3.0546e-05	2.73863e-05	4.08236e-05	5.14839e-05	3.10191e-05	4.56159e-05	1.4802e-05	2.54578e-05	2.56785e-05	3.99853e-05
Nocardioides sp. 603	4.5021e-05	4.4157e-05	4.77896e-05	3.5228e-05	4.62564e-05	4.61579e-05	5.40182e-05	5.07922e-05	5.9597e-05	5.18679e-05	5.78268e-05	5.41929e-05	7.64277e-05	4.563e-05	6.31218e-05	6.59292e-05	4.46853e-06	2.27731e-05	1.80296e-05	1.97379e-05
Pararhodospirillum photometricum	4.5021e-05	4.49902e-05	4.49534e-05	4.09266e-05	5.07777e-05	3.32337e-05	3.94227e-05	2.98684e-05	3.04879e-05	3.19352e-05	3.46539e-05	2.4778e-05	3.09439e-05	3.84253e-05	4.57836e-05	3.26082e-05	7.19154e-06	2.36989e-05	2.13077e-05	2.15207e-05
Trueperella bialowiezensis	4.5021e-05	3.52701e-05	5.00585e-05	4.85248e-05	5.72118e-05	5.79072e-05	4.79994e-05	3.54587e-05	3.7995e-05	5.03676e-05	3.99205e-05	3.76742e-05	5.48043e-05	6.01896e-05	5.75681e-05	4.72196e-05	5.86495e-06	3.17528e-05	2.73176e-05	3.83298e-05
Sphingopyxis sp. 113P3	4.48424e-05	3.1382e-05	4.24009e-05	4.42076e-05	4.72997e-05	3.67585e-05	4.01751e-05	2.82712e-05	2.66578e-05	3.40785e-05	2.54901e-05	2.81108e-05	6.00237e-05	5.65873e-05	6.56954e-05	6.48601e-05	3.00229e-06	2.01811e-05	2.97762e-05	3.27268e-05
Actinobacteria bacterium IMCC26256	4.46637e-05	5.3044e-05	6.22541e-05	5.56049e-05	6.22548e-05	7.016e-05	6.21434e-05	5.52645e-05	5.4388e-05	4.6724e-05	5.64575e-05	4.76724e-05	8.18336e-05	6.79948e-05	8.79099e-05	7.89368e-05	1.2847e-05	3.46225e-05	3.2986e-05	3.80751e-05
Candidatus Symbiobacter mobilis	4.46637e-05	4.66565e-05	4.73642e-05	5.80225e-05	7.09496e-05	5.05219e-05	7.40304e-05	6.18132e-05	5.53072e-05	7.52299e-05	6.37253e-05	5.79603e-05	4.38061e-05	5.73377e-05	4.48354e-05	5.22088e-05	2.19237e-05	2.41617e-05	2.1376e-05	2.0502e-05
Chryseobacterium gallinarum	4.46637e-05	3.88804e-05	3.99901e-05	3.48826e-05	2.79973e-05	3.15552e-05	2.93413e-05	2.65142e-05	1.94571e-05	1.47888e-05	1.72743e-05	2.26045e-05	1.08117e-05	1.56103e-05	1.01591e-05	1.08694e-05	7.21249e-05	4.74903e-05	5.5523e-05	5.56483e-05
Georgenia sp. ZLJ0423	4.46637e-05	5.13777e-05	4.77896e-05	4.04085e-05	4.97343e-05	3.7262e-05	4.22816e-05	4.37644e-05	4.44296e-05	4.4795e-05	3.96045e-05	5.24541e-05	3.87731e-05	6.00395e-05	4.30745e-05	4.3834e-05	1.43831e-05	3.80478e-05	3.71519e-05	4.67344e-05
Hydrogenophaga crassostreae	4.46637e-05	3.80473e-05	2.62346e-05	2.79751e-05	3.73877e-05	3.67585e-05	3.49087e-05	3.64171e-05	3.17136e-05	2.95776e-05	3.1178e-05	4.30355e-05	3.20624e-05	4.42791e-05	3.61663e-05	3.97357e-05	8.65778e-06	2.39766e-05	2.11028e-05	1.97379e-05
Luteipulveratus mongoliensis	4.46637e-05	6.22087e-05	6.46649e-05	4.31715e-05	5.79074e-05	5.3711e-05	6.99678e-05	4.7438e-05	5.00983e-05	6.90143e-05	5.70895e-05	4.5354e-05	9.30182e-05	8.64569e-05	8.26272e-05	8.17878e-05	6.63298e-06	2.37914e-05	2.1376e-05	2.90339e-05
Lysobacter maris	4.46637e-05	4.72119e-05	4.26845e-05	3.02201e-05	3.11274e-05	2.26593e-05	2.79871e-05	3.2424e-05	2.98751e-05	3.57931e-05	3.76032e-05	4.14416e-05	4.90256e-05	4.44292e-05	5.40463e-05	5.45252e-05	7.88975e-06	1.34232e-05	1.14734e-05	1.5281e-05
Maricaulis maris	4.46637e-05	4.2213e-05	3.44596e-05	2.50395e-05	3.72138e-05	4.43116e-05	4.58929e-05	4.12088e-05	3.43181e-05	2.87202e-05	3.29686e-05	3.41966e-05	2.01322e-05	2.16142e-05	2.50591e-05	2.6728e-05	7.75011e-06	1.53672e-05	1.161e-05	1.70638e-05
Myxococcus xanthus	4.46637e-05	4.99891e-05	4.04155e-05	4.67979e-05	4.59086e-05	3.0716e-05	4.21312e-05	3.80143e-05	2.88027e-05	3.02206e-05	3.94992e-05	4.31804e-05	2.70293e-05	2.44661e-05	3.25091e-05	2.7619e-05	2.65319e-06	3.24008e-05	2.44492e-05	2.25395e-05
Streptomyces puniciscabiei	4.46637e-05	4.44348e-05	3.31833e-05	3.2983e-05	3.77354e-05	3.23944e-05	3.17488e-05	2.12433e-05	3.32456e-05	3.12922e-05	2.88607e-05	3.66599e-05	1.75225e-05	2.04134e-05	1.39518e-05	2.29861e-05	4.18925e-06	1.37009e-05	1.80296e-05	1.74458e-05
Acidipropionibacterium jensenii	4.4485e-05	4.69342e-05	3.87138e-05	6.18216e-05	6.59066e-05	5.0354e-05	5.462e-05	5.17506e-05	5.2856e-05	6.83713e-05	6.22507e-05	5.47725e-05	8.85443e-05	0.000109572	7.73445e-05	7.37694e-05	4.88746e-06	4.36948e-05	2.69761e-05	2.94159e-05
Chryseobacterium piperi	4.4485e-05	4.16576e-05	3.87138e-05	3.71275e-05	2.24326e-05	2.53449e-05	3.5661e-05	3.2424e-05	3.52373e-05	3.21495e-05	2.67541e-05	3.14435e-05	1.75225e-05	1.75616e-05	1.55773e-05	1.22949e-05	2.51355e-06	6.01729e-06	4.02934e-06	2.54683e-06
Deinococcus gobiensis	4.4485e-05	3.99913e-05	4.25427e-05	4.07539e-05	4.99082e-05	5.22004e-05	6.22939e-05	4.69589e-05	6.28143e-05	4.05084e-05	4.36071e-05	5.86848e-05	8.57482e-05	8.8108e-05	7.38227e-05	9.23009e-05	5.58566e-06	1.87924e-05	1.83711e-05	1.78278e-05
Macrococcus sp. IME1552	4.4485e-05	5.3044e-05	7.54423e-05	6.70022e-05	5.6864e-05	6.62995e-05	5.4921e-05	5.60631e-05	4.41232e-05	7.03003e-05	5.05589e-05	4.91214e-05	6.00237e-05	7.06965e-05	8.03245e-05	6.25436e-05	1.62682e-05	2.83275e-05	3.45567e-05	4.76258e-05
Microbacterium sp. No. 7	4.4485e-05	6.63744e-05	7.07626e-05	4.81794e-05	6.45154e-05	5.85785e-05	5.9736e-05	5.11117e-05	6.08226e-05	6.8157e-05	6.1408e-05	6.63646e-05	7.58685e-05	5.67374e-05	6.14963e-05	6.96711e-05	7.75011e-06	4.0825e-05	3.62641e-05	4.45696e-05
Mycoplasma penetrans	4.4485e-05	3.44369e-05	4.86404e-05	3.41918e-05	6.08636e-05	6.29426e-05	6.36481e-05	5.92576e-05	3.70758e-05	4.11514e-05	4.37124e-05	4.12967e-05	4.49246e-05	6.04898e-05	4.99827e-05	6.34346e-05	2.98833e-05	4.37873e-05	5.12888e-05	6.94012e-05
Rhizobium sp. ACO-34A	4.4485e-05	3.33261e-05	4.2259e-05	4.47257e-05	4.55608e-05	4.43116e-05	4.16797e-05	3.45004e-05	3.98335e-05	2.91489e-05	4.07631e-05	3.41966e-05	4.77207e-05	4.84819e-05	4.52418e-05	3.93793e-05	3.28856e-05	3.43448e-05	4.2274e-05	4.92812e-05
Sulfuriflexus mobilis	4.4485e-05	4.4157e-05	3.36087e-05	5.56049e-05	3.66921e-05	5.16968e-05	4.40872e-05	4.42436e-05	4.65745e-05	6.04411e-05	4.48711e-05	4.10069e-05	3.65362e-05	2.70178e-05	2.91227e-05	2.94009e-05	9.28617e-06	9.72023e-06	9.0148e-06	8.78657e-06
Alteromonas mediterranea	4.43064e-05	3.72141e-05	4.59461e-05	3.67821e-05	3.77354e-05	3.91083e-05	4.34854e-05	4.64797e-05	3.1254e-05	3.98654e-05	3.3074e-05	4.36151e-05	3.67226e-05	3.25714e-05	2.74972e-05	3.97357e-05	6.21405e-06	1.24049e-05	1.55027e-05	1.41349e-05
Colwellia sp. Arc7-635	4.43064e-05	4.30462e-05	5.03422e-05	4.23081e-05	2.5041e-05	4.14582e-05	4.64947e-05	5.57437e-05	4.58085e-05	5.05819e-05	4.43444e-05	4.76724e-05	1.65904e-05	8.85583e-06	7.85636e-06	1.88878e-05	9.91455e-06	5.73957e-06	1.16783e-05	1.92286e-05
Helicobacter felis	4.43064e-05	3.16598e-05	4.48116e-05	3.60914e-05	4.88648e-05	5.72358e-05	4.31844e-05	3.94518e-05	3.26328e-05	2.95776e-05	3.50753e-05	2.76761e-05	4.39926e-05	4.72811e-05	2.56009e-05	3.97357e-05	1.24281e-05	1.80519e-05	2.34248e-05	3.14534e-05
Helicobacter bilis	4.41277e-05	4.0269e-05	5.53055e-05	5.18058e-05	5.11254e-05	5.95856e-05	5.85322e-05	5.51048e-05	5.05579e-05	2.59339e-05	3.09673e-05	6.60748e-05	3.87731e-05	4.51797e-05	3.50827e-05	4.13394e-05	7.81993e-06	1.3238e-05	1.18832e-05	1.20975e-05
Methylomonas methanica	4.41277e-05	5.63766e-05	2.76527e-05	4.42076e-05	5.92986e-05	5.05219e-05	5.29649e-05	5.78201e-05	4.56553e-05	6.64423e-05	4.8663e-05	5.91195e-05	4.0078e-05	4.83318e-05	4.45645e-05	3.26082e-05	1.1311e-05	2.17548e-05	1.73467e-05	2.34309e-05
Plantactinospora sp. KBS50	4.41277e-05	4.69342e-05	4.11246e-05	5.16331e-05	5.89508e-05	4.8172e-05	5.08583e-05	4.29658e-05	4.50425e-05	6.02268e-05	4.79257e-05	4.94112e-05	4.30605e-05	5.89888e-05	5.70263e-05	4.97142e-05	4.18925e-06	2.74018e-05	1.99418e-05	2.4959e-05
Sphingobium yanoikuyae	4.41277e-05	4.55456e-05	4.67969e-05	2.83205e-05	3.89527e-05	4.09546e-05	3.7918e-05	3.29032e-05	4.25912e-05	2.82916e-05	3.77085e-05	3.41966e-05	3.54177e-05	3.96261e-05	3.06127e-05	4.11612e-05	1.05429e-05	8.60935e-06	1.20197e-05	1.19701e-05
Streptomyces tirandamycinicus	4.41277e-05	5.63766e-05	2.822e-05	4.33442e-05	4.62564e-05	5.06897e-05	2.73852e-05	4.80769e-05	4.55021e-05	3.57931e-05	4.95056e-05	3.24578e-05	3.24352e-05	4.08269e-05	2.07245e-05	2.56589e-05	1.6757e-06	2.11994e-05	1.73467e-05	1.74458e-05
Vibrio mediterranei	4.41277e-05	4.99891e-05	6.22541e-05	5.85406e-05	5.91247e-05	6.05927e-05	4.78489e-05	4.95145e-05	5.53072e-05	6.04411e-05	5.79321e-05	5.66562e-05	7.25132e-05	6.93457e-05	8.03245e-05	6.96711e-05	7.95957e-06	2.42543e-05	1.83028e-05	2.58503e-05
Campylobacter curvus	4.39491e-05	5.11e-05	4.7506e-05	4.09266e-05	4.92126e-05	5.06897e-05	4.86013e-05	4.90353e-05	3.56969e-05	5.05819e-05	4.09738e-05	3.41966e-05	3.09439e-05	3.18209e-05	3.08836e-05	3.3321e-05	2.17841e-05	2.42543e-05	1.87125e-05	2.52136e-05
Methanobacterium paludis	4.39491e-05	4.4157e-05	4.18336e-05	5.43961e-05	6.59066e-05	4.75007e-05	5.80808e-05	7.2355e-05	7.6756e-05	5.33682e-05	5.88801e-05	7.86811e-05	7.10219e-05	7.23476e-05	7.58545e-05	6.39691e-05	4.04961e-06	2.84201e-05	1.93272e-05	2.03747e-05
Methylococcus capsulatus	4.39491e-05	4.77674e-05	4.31099e-05	4.59345e-05	3.6866e-05	4.63257e-05	4.10779e-05	4.36047e-05	3.78418e-05	4.86529e-05	3.65499e-05	3.92681e-05	6.93442e-05	7.15971e-05	8.27626e-05	6.27218e-05	1.33358e-05	2.15697e-05	1.81662e-05	2.34309e-05
Thauera sp. K11	4.39491e-05	4.86005e-05	5.51637e-05	4.57618e-05	4.29523e-05	4.98505e-05	4.42377e-05	3.33823e-05	4.50425e-05	4.11514e-05	3.62339e-05	3.34721e-05	9.46958e-05	7.70007e-05	9.46826e-05	9.17663e-05	2.15048e-05	2.48097e-05	3.12103e-05	3.89665e-05
Thiohalobacter thiocyanaticus	4.39491e-05	5.08223e-05	3.91393e-05	2.86659e-05	3.39097e-05	3.55835e-05	4.66452e-05	4.04102e-05	3.23264e-05	4.02941e-05	4.13951e-05	3.33272e-05	7.17675e-05	4.69809e-05	6.01418e-05	6.52164e-05	1.57097e-05	1.87924e-05	1.88491e-05	2.48316e-05
Candidatus Nucleicultrix amoebiphila	4.37704e-05	5.19331e-05	3.74375e-05	3.76456e-05	3.19969e-05	4.24652e-05	3.98741e-05	4.2806e-05	3.44713e-05	3.30068e-05	3.2126e-05	4.56438e-05	4.02644e-05	3.87255e-05	2.92582e-05	3.63501e-05	5.3762e-06	1.64781e-05	1.15417e-05	1.27342e-05
Cyanothece sp. PCC 7425	4.37704e-05	4.13799e-05	3.13398e-05	3.86817e-05	7.47753e-05	7.30134e-05	6.60556e-05	8.01815e-05	9.25362e-05	5.10106e-05	5.81428e-05	0.000112443	3.87731e-05	4.77314e-05	5.12018e-05	4.15176e-05	5.0271e-06	1.9533e-05	1.73467e-05	2.21574e-05
Glutamicibacter nicotianae	4.37704e-05	3.36038e-05	2.26894e-05	2.76298e-05	3.26925e-05	2.24915e-05	2.10656e-05	9.74317e-06	1.34821e-05	1.05022e-05	1.08491e-05	1.36207e-05	1.19302e-05	1.3659e-05	1.28682e-05	1.53241e-05	2.16445e-06	1.54598e-05	1.31807e-05	1.40076e-05
Haloterrigena daqingensis	4.37704e-05	3.94358e-05	2.75109e-05	3.73002e-05	2.38238e-05	3.02124e-05	3.00937e-05	3.25837e-05	4.07527e-05	3.08635e-05	3.22313e-05	4.15865e-05	1.67768e-05	2.34154e-05	9.48181e-06	2.38771e-05	3.14194e-06	5.64699e-06	7.64892e-06	9.1686e-06
Lacinutrix sp. Bg11-31	4.37704e-05	4.58233e-05	4.53788e-05	3.38465e-05	1.93025e-05	2.0813e-05	2.69338e-05	2.84309e-05	3.41649e-05	3.32212e-05	3.76032e-05	3.05741e-05	3.22488e-05	1.44095e-05	2.73618e-05	3.51028e-05	6.63298e-06	6.20243e-06	9.15139e-06	8.2772e-06
Nostoc sp. PCC 7524	4.37704e-05	4.05467e-05	3.00635e-05	3.35011e-05	3.86049e-05	3.34015e-05	3.05451e-05	2.85906e-05	5.20899e-05	3.90081e-05	3.56019e-05	4.33253e-05	3.37401e-05	3.18209e-05	4.2939e-05	2.99354e-05	6.98208e-06	1.08311e-05	9.90263e-06	1.05694e-05
Cupriavidus metallidurans	4.35918e-05	6.55413e-05	6.04106e-05	4.88701e-05	6.22548e-05	4.75007e-05	5.26639e-05	4.90353e-05	5.02515e-05	5.80835e-05	4.49764e-05	4.52091e-05	2.25555e-05	2.62673e-05	2.39754e-05	2.29861e-05	6.77262e-06	1.08311e-05	1.09953e-05	1.87192e-05
Jannaschia sp. CCS1	4.35918e-05	4.2213e-05	4.38189e-05	4.54164e-05	4.88648e-05	4.69971e-05	4.54415e-05	6.11743e-05	6.52656e-05	5.18679e-05	5.86694e-05	7.08565e-05	3.91459e-05	3.70744e-05	3.34572e-05	3.59938e-05	1.87818e-05	2.84201e-05	2.81371e-05	3.11987e-05
Marinovum algicola	4.35918e-05	4.49902e-05	4.87823e-05	4.83521e-05	5.16471e-05	4.24652e-05	5.14602e-05	4.31255e-05	5.57669e-05	5.42255e-05	5.82481e-05	4.88316e-05	3.57906e-05	3.032e-05	2.79036e-05	2.7619e-05	6.84244e-06	2.96236e-05	1.88491e-05	2.90339e-05
Modestobacter marinus	4.35918e-05	5.3044e-05	4.46698e-05	4.36896e-05	6.32982e-05	6.99921e-05	5.73285e-05	5.57437e-05	6.00566e-05	5.22966e-05	5.16122e-05	5.37582e-05	6.99034e-05	6.49928e-05	6.48827e-05	5.64853e-05	5.16674e-06	3.46225e-05	2.99128e-05	3.24721e-05
Phyllobacterium zundukense	4.35918e-05	2.9438e-05	2.55256e-05	2.83205e-05	4.12134e-05	4.02832e-05	3.35545e-05	5.12714e-05	4.41232e-05	4.13657e-05	4.94003e-05	4.56438e-05	3.35536e-05	3.31718e-05	2.72263e-05	3.47465e-05	7.81993e-06	1.86073e-05	2.02833e-05	1.70638e-05
Synechococcus sp. PCC 7502	4.35918e-05	5.33217e-05	4.58043e-05	6.23397e-05	5.42556e-05	5.23682e-05	5.92845e-05	5.06325e-05	5.40816e-05	4.95103e-05	5.44562e-05	5.4048e-05	2.72157e-05	3.1971e-05	2.56009e-05	2.79754e-05	1.30565e-05	2.26805e-05	1.98735e-05	2.06293e-05
Alcanivorax pacificus	4.34131e-05	4.99891e-05	4.56625e-05	4.64525e-05	4.90387e-05	5.72358e-05	5.47705e-05	5.68618e-05	4.35104e-05	3.64361e-05	4.63457e-05	4.10069e-05	7.75462e-05	7.64003e-05	7.04363e-05	7.64422e-05	6.98208e-06	2.64761e-05	2.30834e-05	2.22848e-05
Microbacterium oxydans	4.34131e-05	3.77695e-05	4.4528e-05	5.97494e-05	5.28644e-05	4.14582e-05	3.49087e-05	4.42436e-05	5.39284e-05	3.87938e-05	4.82416e-05	6.10032e-05	8.6121e-05	7.92522e-05	8.99417e-05	0.000100497	3.84014e-06	1.79593e-05	1.33173e-05	1.80825e-05
Microbacterium sp. XT11	4.34131e-05	2.91603e-05	2.31148e-05	1.7614e-05	2.55627e-05	1.84632e-05	3.03946e-05	2.17225e-05	2.89559e-05	2.76486e-05	3.76032e-05	3.12986e-05	3.37401e-05	3.15208e-05	3.576e-05	2.70844e-05	3.14194e-06	1.29603e-05	1.49564e-05	1.66818e-05
Staphylococcus aureus	4.34131e-05	5.74875e-05	7.67186e-05	6.30304e-05	8.72958e-05	0.000100037	9.0281e-05	6.43688e-05	6.66445e-05	6.27987e-05	6.1724e-05	5.63664e-05	6.59888e-05	8.75076e-05	4.25327e-05	7.12748e-05	4.54533e-05	4.94343e-05	6.41963e-05	9.77984e-05
Burkholderia insecticola	4.32345e-05	5.55434e-05	3.36087e-05	2.83205e-05	3.39097e-05	3.82691e-05	3.85199e-05	4.34449e-05	4.397e-05	3.23639e-05	3.2758e-05	4.98459e-05	4.34333e-05	3.88756e-05	2.79036e-05	4.9536e-05	4.11943e-06	9.53508e-06	9.35627e-06	1.4899e-05
Cellulomonas fimi	4.32345e-05	4.69342e-05	6.0127e-05	5.88859e-05	5.33861e-05	6.49567e-05	4.87518e-05	4.58408e-05	5.59201e-05	6.17271e-05	4.78203e-05	5.76705e-05	5.36858e-05	2.86689e-05	4.99827e-05	4.57941e-05	1.1311e-05	2.49949e-05	2.74542e-05	3.94759e-05
Cellulomonas gilvus	4.32345e-05	5.55434e-05	5.24693e-05	6.63114e-05	6.10375e-05	6.26069e-05	3.88208e-05	5.70215e-05	5.46944e-05	4.50093e-05	4.91896e-05	5.94093e-05	4.86528e-05	5.94391e-05	5.98708e-05	5.59507e-05	3.00229e-06	2.83275e-05	2.23321e-05	2.6105e-05
Nostocales cyanobacterium HT-58-2	4.32345e-05	4.33239e-05	4.19754e-05	3.95451e-05	5.40817e-05	5.1529e-05	5.41686e-05	4.53616e-05	3.38585e-05	3.30068e-05	4.05525e-05	3.33272e-05	3.16896e-05	2.7318e-05	2.45172e-05	2.4768e-05	4.53835e-06	2.67538e-05	1.65954e-05	2.03747e-05
Halomicronema hongdechloris	4.30558e-05	5.4988e-05	5.51637e-05	4.93882e-05	5.75596e-05	5.45502e-05	6.62061e-05	4.72783e-05	2.94155e-05	6.70853e-05	4.16058e-05	3.81089e-05	4.69751e-05	4.81817e-05	7.20617e-05	3.27864e-05	3.03721e-05	4.38799e-05	3.89276e-05	4.1386e-05
Leisingera sp. NJS204	4.30558e-05	6.63744e-05	4.90659e-05	7.51184e-05	4.6778e-05	4.78363e-05	6.09397e-05	5.11117e-05	5.19367e-05	6.5585e-05	5.11909e-05	4.81071e-05	5.12625e-05	6.04898e-05	6.00063e-05	5.29215e-05	3.63068e-06	1.56449e-05	1.11319e-05	1.92286e-05
Vibrio anguillarum	4.30558e-05	3.77695e-05	1.91442e-05	2.40034e-05	1.46073e-05	2.43378e-05	3.14479e-05	1.86877e-05	1.22565e-05	4.4152e-05	1.4325e-05	1.55044e-05	4.99576e-05	5.19342e-05	4.4429e-05	6.16527e-05	4.60817e-06	1.61078e-05	1.07222e-05	9.93265e-06
Actinoalloteichus sp. AHMU CJ021	4.28771e-05	4.16576e-05	2.70855e-05	4.29988e-05	6.57327e-05	5.63965e-05	5.9736e-05	4.4563e-05	7.1547e-05	4.801e-05	5.73001e-05	6.15829e-05	6.71073e-05	8.49559e-05	5.72972e-05	6.39691e-05	2.85567e-05	4.09175e-05	3.50348e-05	3.66744e-05
Geminocystis sp. NIES-3708	4.28771e-05	4.08244e-05	3.43178e-05	3.95451e-05	3.54748e-05	3.62549e-05	2.45263e-05	4.83964e-05	4.18251e-05	4.95103e-05	4.78203e-05	4.0862e-05	1.67768e-05	1.53101e-05	2.65491e-05	1.53241e-05	1.25677e-06	1.49969e-05	9.15139e-06	9.55062e-06
Methanosarcina lacustris	4.28771e-05	3.1382e-05	2.2973e-05	3.45372e-05	3.6866e-05	3.40729e-05	3.86704e-05	2.26808e-05	2.48193e-05	4.2866e-05	2.78074e-05	3.20231e-05	2.66565e-05	9.68137e-05	4.48354e-05	5.98708e-05	4.32889e-06	1.43489e-05	1.49564e-05	1.37529e-05
Sphingomonas panacis	4.28771e-05	5.66543e-05	6.28213e-05	5.57776e-05	5.6864e-05	4.66614e-05	4.61938e-05	6.21327e-05	5.89842e-05	7.52299e-05	5.81428e-05	5.88297e-05	8.14608e-05	6.63437e-05	7.73445e-05	7.87586e-05	6.00459e-06	1.84222e-05	2.17175e-05	2.17754e-05
Streptomyces violaceusniger	4.28771e-05	3.36038e-05	5.91343e-05	2.79751e-05	2.38238e-05	2.18201e-05	2.54292e-05	3.16254e-05	2.92623e-05	3.55788e-05	3.51806e-05	3.31823e-05	3.85867e-05	1.56103e-05	2.54654e-05	3.68847e-05	4.95728e-06	1.70335e-05	1.7415e-05	1.57904e-05
Piscirickettsia salmonis	4.26985e-05	3.91581e-05	5.00585e-05	2.33126e-05	3.6866e-05	4.28009e-05	4.57424e-05	4.67991e-05	3.53905e-05	2.95776e-05	3.79192e-05	2.89802e-05	4.32469e-05	5.04332e-05	4.172e-05	4.79323e-05	1.62682e-05	2.09216e-05	1.57076e-05	2.43222e-05
Pseudoalteromonas luteoviolacea	4.26985e-05	5.60989e-05	3.04889e-05	4.97336e-05	5.28644e-05	5.5893e-05	7.44819e-05	6.14938e-05	6.17419e-05	5.05819e-05	4.66617e-05	6.21625e-05	5.66684e-05	5.47861e-05	5.30981e-05	5.00705e-05	2.79283e-06	1.67558e-05	1.40003e-05	1.57904e-05
Sedimenticola thiotaurini	4.26985e-05	4.99891e-05	5.45964e-05	6.07855e-05	4.55608e-05	4.80042e-05	4.61938e-05	4.69589e-05	5.16303e-05	3.57931e-05	4.7083e-05	4.5354e-05	5.38722e-05	4.57801e-05	5.37754e-05	4.08048e-05	2.6113e-05	2.3884e-05	2.36297e-05	3.32362e-05
Brachyspira intermedia	4.25198e-05	4.97114e-05	4.94913e-05	4.09266e-05	5.07777e-05	6.54603e-05	6.50023e-05	5.90979e-05	6.18951e-05	8.48747e-05	6.77279e-05	6.02787e-05	9.39502e-05	9.89151e-05	0.000142769	0.000103348	1.17299e-05	2.29583e-05	2.34248e-05	4.04946e-05
Helicobacter cinaedi	4.25198e-05	3.05489e-05	3.1907e-05	3.48826e-05	4.90387e-05	4.96827e-05	4.9805e-05	5.25492e-05	4.74938e-05	5.95838e-05	5.29815e-05	4.76724e-05	6.58024e-05	6.84451e-05	8.66908e-05	6.37909e-05	2.17841e-05	4.83234e-05	3.83129e-05	3.37455e-05
Methylocystis bryophila	4.25198e-05	5.13777e-05	5.45964e-05	4.43803e-05	5.07777e-05	3.69263e-05	5.32658e-05	4.58408e-05	4.71873e-05	6.47277e-05	5.48775e-05	5.50623e-05	8.50026e-05	7.42989e-05	8.6149e-05	7.76895e-05	5.44602e-06	3.50854e-05	3.27128e-05	3.75658e-05
Sulfuricaulis limicola	4.25198e-05	3.30483e-05	5.13348e-05	3.71275e-05	4.79953e-05	4.78363e-05	5.13097e-05	4.72783e-05	3.11007e-05	3.08635e-05	2.73861e-05	2.46331e-05	2.79614e-05	3.31718e-05	2.77682e-05	3.01136e-05	1.63381e-05	1.70335e-05	1.93272e-05	2.24121e-05
Zobellella denitrificans	4.25198e-05	4.16576e-05	2.51002e-05	3.86817e-05	5.89508e-05	3.84369e-05	4.42377e-05	2.81114e-05	3.56969e-05	3.98654e-05	3.39166e-05	3.17333e-05	4.54838e-05	5.08835e-05	5.39109e-05	5.36343e-05	4.32889e-06	2.44394e-05	2.11028e-05	1.85919e-05
Lysobacter enzymogenes	4.23412e-05	4.0269e-05	3.98483e-05	3.2983e-05	3.86049e-05	4.11225e-05	4.76985e-05	3.41809e-05	3.70758e-05	3.85794e-05	3.78139e-05	3.62252e-05	3.93323e-05	3.33219e-05	3.33218e-05	4.84669e-05	3.40726e-05	2.62909e-05	3.70836e-05	4.03673e-05
Nocardia farcinica	4.23412e-05	4.55456e-05	4.8215e-05	4.29988e-05	4.1909e-05	3.89405e-05	4.3034e-05	4.56811e-05	4.65745e-05	4.6724e-05	4.52924e-05	4.91214e-05	3.82139e-05	4.62304e-05	4.10427e-05	4.56159e-05	3.00229e-06	3.49003e-05	2.15126e-05	2.78878e-05
Rhodobacter capsulatus	4.23412e-05	4.16576e-05	3.61613e-05	4.24808e-05	5.1821e-05	4.69971e-05	4.39368e-05	2.97087e-05	5.10175e-05	4.24374e-05	4.56084e-05	4.76724e-05	2.23691e-05	2.92693e-05	2.42463e-05	2.81535e-05	4.29398e-05	3.82329e-05	4.63033e-05	3.74384e-05
Streptococcus lutetiensis	4.23412e-05	5.4988e-05	4.70806e-05	4.33442e-05	5.99941e-05	5.85785e-05	5.9736e-05	5.52645e-05	7.04746e-05	4.97246e-05	6.72013e-05	6.76687e-05	3.42993e-05	3.3472e-05	4.21263e-05	3.26082e-05	2.0248e-06	1.37009e-05	9.0148e-06	1.45169e-05
Streptomyces sp. MK-45	4.23412e-05	3.8325e-05	4.49534e-05	6.07855e-05	5.26905e-05	3.77655e-05	3.92723e-05	4.80769e-05	5.79117e-05	6.17271e-05	5.56148e-05	5.24541e-05	7.23267e-05	7.67005e-05	7.13845e-05	8.14315e-05	2.16445e-06	3.32339e-05	2.19224e-05	1.75731e-05
Tetragenococcus osmophilus	4.23412e-05	4.99891e-05	5.38874e-05	5.24966e-05	4.99082e-05	6.15998e-05	6.28958e-05	4.44033e-05	4.71873e-05	5.20822e-05	4.57137e-05	4.62234e-05	4.49246e-05	4.78815e-05	5.7839e-05	4.04484e-05	2.31805e-05	4.00844e-05	4.69862e-05	6.36708e-05
Comamonas serinivorans	4.21625e-05	3.94358e-05	4.24009e-05	3.2983e-05	3.11274e-05	3.22266e-05	3.62629e-05	4.36047e-05	2.98751e-05	4.84386e-05	3.67606e-05	4.30355e-05	4.43654e-05	3.4973e-05	5.32336e-05	4.88232e-05	1.84327e-05	2.62909e-05	1.72101e-05	2.02473e-05
Devosia sp. H5989	4.21625e-05	5.63766e-05	4.48116e-05	3.47099e-05	3.75616e-05	3.62549e-05	3.32535e-05	3.76949e-05	3.01815e-05	4.5438e-05	3.2758e-05	3.82538e-05	8.46297e-05	8.12035e-05	8.58781e-05	8.78462e-05	4.46853e-06	2.44394e-05	2.01467e-05	2.10114e-05
Hyphomonas sp. Mor2	4.21625e-05	4.36016e-05	4.46698e-05	4.92155e-05	3.5127e-05	4.69971e-05	4.37863e-05	4.05699e-05	3.95271e-05	3.68648e-05	4.11845e-05	4.27457e-05	5.77868e-05	5.6137e-05	6.28508e-05	5.7198e-05	2.65319e-06	1.92553e-05	1.72101e-05	1.5663e-05
Microbacterium lemovicicum	4.21625e-05	5.11e-05	3.97065e-05	4.33442e-05	3.87788e-05	4.04511e-05	4.64947e-05	4.79172e-05	4.09059e-05	5.01533e-05	3.85512e-05	4.0862e-05	4.0078e-05	4.65306e-05	3.73854e-05	4.9536e-05	2.44373e-06	1.8885e-05	1.5093e-05	1.54083e-05
Brachybacterium saurashtrense	4.19839e-05	4.36016e-05	2.92126e-05	4.38623e-05	3.53009e-05	3.08838e-05	3.65638e-05	3.84935e-05	2.91091e-05	2.97919e-05	3.31793e-05	3.9413e-05	4.66023e-05	6.079e-05	4.38872e-05	5.8089e-05	2.65319e-06	2.66612e-05	1.63906e-05	2.0884e-05
Chryseobacterium carnis	4.19839e-05	4.97114e-05	3.51686e-05	3.19469e-05	6.55588e-05	5.82428e-05	5.31153e-05	7.10772e-05	4.68809e-05	4.3509e-05	4.78203e-05	5.115e-05	3.37401e-05	3.25714e-05	3.21027e-05	3.18955e-05	5.72531e-06	1.1942e-05	1.60491e-05	1.78278e-05
Glaesserella parasuis	4.19839e-05	3.19375e-05	4.0841e-05	3.45372e-05	4.60825e-05	4.98505e-05	5.56733e-05	3.59379e-05	4.42764e-05	3.77221e-05	4.84523e-05	4.36151e-05	2.88934e-05	2.98697e-05	2.16727e-05	2.99354e-05	6.84244e-06	9.25736e-06	1.11319e-05	1.27342e-05
Lactobacillus amylolyticus	4.19839e-05	3.1382e-05	3.34669e-05	4.59345e-05	5.32122e-05	5.75715e-05	4.70966e-05	3.89727e-05	4.68809e-05	4.30804e-05	4.50817e-05	4.75275e-05	3.95187e-05	4.23279e-05	4.41581e-05	3.99139e-05	1.06128e-05	2.99013e-05	2.59517e-05	3.37455e-05
Massilia violaceinigra	4.19839e-05	5.99869e-05	5.20439e-05	6.07855e-05	5.80813e-05	4.61579e-05	4.81499e-05	4.58408e-05	5.27027e-05	7.26579e-05	5.96174e-05	4.28906e-05	5.87189e-05	4.66807e-05	6.62372e-05	5.04269e-05	7.95957e-06	3.13825e-05	2.45858e-05	3.60377e-05
Microbulbifer sp. A4B17	4.19839e-05	3.97136e-05	3.74375e-05	3.45372e-05	4.29523e-05	4.95148e-05	4.10779e-05	4.64797e-05	3.86078e-05	4.20087e-05	3.89725e-05	3.95579e-05	3.48585e-05	1.71113e-05	2.45172e-05	2.26297e-05	1.15903e-05	2.13845e-05	1.89857e-05	2.50863e-05
Anoxybacillus amylolyticus	4.18052e-05	3.33261e-05	3.14816e-05	3.50553e-05	3.94744e-05	4.76685e-05	3.23507e-05	3.83338e-05	3.60033e-05	4.65096e-05	4.17111e-05	3.69497e-05	4.58566e-05	5.7788e-05	4.48354e-05	4.43686e-05	9.84473e-06	1.47192e-05	1.68003e-05	2.5341e-05
Caulobacter mirabilis	4.18052e-05	5.47103e-05	5.02003e-05	4.80067e-05	4.78214e-05	3.39051e-05	5.25135e-05	5.11117e-05	4.79534e-05	4.45807e-05	4.29751e-05	4.85418e-05	5.79732e-05	5.86886e-05	7.03008e-05	7.50167e-05	4.46853e-06	1.93479e-05	1.7893e-05	1.50263e-05
Deinococcus proteolyticus	4.18052e-05	5.08223e-05	5.60145e-05	4.33442e-05	6.08636e-05	5.18647e-05	5.19116e-05	4.53616e-05	5.91374e-05	6.00124e-05	5.74055e-05	4.44846e-05	8.72395e-05	7.05464e-05	7.30099e-05	8.64207e-05	7.0519e-06	1.86073e-05	1.63223e-05	2.76331e-05
Gloeocapsa sp. PCC 7428	4.18052e-05	4.36016e-05	4.49534e-05	4.19627e-05	3.44314e-05	4.12903e-05	3.77676e-05	3.05073e-05	3.29392e-05	3.32212e-05	2.98087e-05	2.73863e-05	2.21827e-05	2.79184e-05	2.73618e-05	2.69062e-05	2.35994e-05	4.59165e-05	4.08398e-05	4.41875e-05
Hydrogenophilus thermoluteolus	4.18052e-05	3.74918e-05	4.73642e-05	4.88701e-05	3.65182e-05	4.31366e-05	2.96423e-05	3.91324e-05	3.37052e-05	3.75078e-05	3.13887e-05	3.39068e-05	3.70954e-05	4.0977e-05	2.84454e-05	3.74193e-05	3.32347e-05	1.84222e-05	1.6732e-05	2.64871e-05
Ornithinimicrobium sp. AMA3305	4.18052e-05	4.88782e-05	3.14816e-05	4.29988e-05	5.23427e-05	4.04511e-05	4.09274e-05	5.8459e-05	6.81765e-05	3.08635e-05	5.77214e-05	7.47688e-05	6.33791e-05	7.12969e-05	3.9959e-05	5.84453e-05	3.07212e-06	2.00885e-05	1.80296e-05	1.87192e-05
Acinetobacter baumannii	4.16266e-05	4.0269e-05	3.95647e-05	3.59187e-05	4.62564e-05	4.7165e-05	5.68771e-05	4.08894e-05	3.96803e-05	4.11514e-05	4.40284e-05	3.34721e-05	8.77987e-05	0.000102217	9.88817e-05	0.000103705	2.23427e-06	2.3236e-05	1.50247e-05	1.85919e-05
Lysobacter antibioticus	4.16266e-05	2.19397e-05	2.08459e-05	2.15858e-05	2.59105e-05	3.20587e-05	2.24198e-05	2.98684e-05	2.1602e-05	3.92224e-05	2.35942e-05	2.75312e-05	4.25013e-05	4.11271e-05	4.05009e-05	5.25652e-05	6.84244e-06	2.26805e-05	2.09662e-05	2.52136e-05
Mesorhizobium sp. Pch-S	4.16266e-05	3.55478e-05	5.7858e-05	5.83679e-05	3.6866e-05	5.06897e-05	4.31844e-05	3.2424e-05	3.07943e-05	4.5438e-05	2.79127e-05	3.14435e-05	4.58566e-05	5.17841e-05	4.23972e-05	4.57941e-05	8.44832e-06	1.99959e-05	2.49273e-05	2.29215e-05
Pelagibacterium halotolerans	4.16266e-05	4.88782e-05	5.91343e-05	6.19943e-05	5.66901e-05	5.42145e-05	4.48396e-05	3.8174e-05	5.37752e-05	5.61545e-05	5.23496e-05	4.52091e-05	5.72276e-05	4.29283e-05	5.10663e-05	5.63071e-05	7.68029e-06	1.74038e-05	1.9737e-05	2.29215e-05
Salinibacterium sp. CGMCC 1.16371	4.16266e-05	4.49902e-05	3.1198e-05	2.76298e-05	3.82571e-05	4.02832e-05	3.74666e-05	3.01878e-05	4.70341e-05	2.67913e-05	2.61221e-05	3.9413e-05	2.42332e-05	2.49164e-05	3.34572e-05	2.88663e-05	1.60588e-06	9.72023e-06	1.13368e-05	1.38802e-05
Xylanimicrobium sp. FW10M-9	4.16266e-05	6.30418e-05	4.5237e-05	5.12878e-05	6.5211e-05	4.73328e-05	4.96546e-05	6.88411e-05	7.24663e-05	7.15863e-05	7.52064e-05	6.83932e-05	4.77207e-05	4.20277e-05	4.768e-05	4.27649e-05	3.77032e-06	1.90702e-05	2.02833e-05	2.15207e-05
Bacillus velezensis	4.12693e-05	4.49902e-05	5.84253e-05	5.76771e-05	4.1909e-05	4.90113e-05	4.10779e-05	3.57782e-05	3.81482e-05	4.05084e-05	2.9914e-05	2.73863e-05	6.22607e-05	3.82752e-05	4.619e-05	4.68632e-05	1.36151e-05	3.54557e-05	3.66739e-05	4.55883e-05
Basilea psittacipulmonis	4.12693e-05	4.47125e-05	3.8572e-05	4.93882e-05	2.46932e-05	4.29688e-05	3.5661e-05	1.24585e-05	1.96103e-05	1.32885e-05	1.64317e-05	1.36207e-05	3.56041e-05	4.15774e-05	3.07481e-05	4.3834e-05	2.47166e-05	8.60935e-06	1.22929e-05	1.38802e-05
Maribacter sp. MJ134	4.12693e-05	4.2213e-05	3.75794e-05	3.35011e-05	3.25186e-05	2.66876e-05	2.6031e-05	2.92295e-05	2.14488e-05	2.03614e-05	2.86501e-05	2.23147e-05	3.52313e-05	2.4316e-05	3.33218e-05	2.35207e-05	3.21176e-06	1.43489e-05	1.28393e-05	1.12061e-05
Massilia sp. NR 4-1	4.12693e-05	4.33239e-05	4.90659e-05	4.99063e-05	4.5213e-05	3.23944e-05	3.76171e-05	2.58753e-05	2.84963e-05	3.42928e-05	3.023e-05	2.21698e-05	4.04508e-05	4.59302e-05	4.47e-05	4.6685e-05	8.93706e-06	1.55524e-05	1.8576e-05	1.91012e-05
Methylobacterium sp. 17SD2-17	4.12693e-05	4.38793e-05	3.95647e-05	3.35011e-05	4.3474e-05	3.60871e-05	4.10779e-05	3.57782e-05	4.02931e-05	4.58667e-05	4.52924e-05	3.81089e-05	3.11303e-05	3.46728e-05	3.61663e-05	2.81535e-05	4.18925e-06	1.71261e-05	2.00101e-05	2.02473e-05
Neorhizobium galegae	4.12693e-05	4.52679e-05	4.77896e-05	4.05812e-05	5.14732e-05	5.55573e-05	4.93536e-05	4.18477e-05	4.50425e-05	3.70791e-05	3.92885e-05	3.44864e-05	4.36197e-05	5.65873e-05	4.95763e-05	4.56159e-05	2.43675e-05	3.40671e-05	3.07323e-05	4.08767e-05
Rhodothermaceae bacterium	4.12693e-05	5.88761e-05	6.33886e-05	6.04401e-05	5.70379e-05	5.1529e-05	6.54538e-05	4.87158e-05	5.37752e-05	6.27987e-05	9.34287e-05	7.11463e-05	0.000109049	0.000113175	0.000122722	0.000105487	1.18695e-05	5.19338e-05	5.73669e-05	4.08767e-05
[truncated: 2,580 more rows]

## Sheet: top 250
Table S2 – Species relative abundance for each sample. Tab 1 contains abundances for each bacterial taxa, tab 2 contains the relative abundance of the top 250 most abundant taxa, and tab 3 contains the relative abundance of the top 25 most abundant taxa.
[truncated: 251 more rows]

[truncated: 1 more sheets: top 25]
